# Supplementary material for: Maternal Disorders among Women Aged 15 to 49 Years Global Trends, Inequalities, and Projections from the GBD Study 2021
Source: Research Square preprint supplement (doi:10.21203/rs.3.rs-5848433/v1), 2025-04-04
Supplement: Supplementary file 1 [file 186c448a4431e1e91386002d.xlsx]

## Sheet: Table S7
measure	location	cause	sex	age	year	val
Incidence	Global	Maternal sepsis and other maternal infections	Female	15 to 19	1992	1453.1961906072
Incidence	Global	Maternal sepsis and other maternal infections	Female	15 to 19	1993	1433.94318005047
Incidence	Global	Maternal sepsis and other maternal infections	Female	15 to 19	1994	1415.91445365146
Incidence	Global	Maternal sepsis and other maternal infections	Female	15 to 19	1995	1399.36608924439
Incidence	Global	Maternal sepsis and other maternal infections	Female	15 to 19	1996	1381.34879134946
Incidence	Global	Maternal sepsis and other maternal infections	Female	15 to 19	1997	1358.98353892465
Incidence	Global	Maternal sepsis and other maternal infections	Female	15 to 19	1998	1333.61502423677
Incidence	Global	Maternal sepsis and other maternal infections	Female	15 to 19	1999	1306.98236834795
Incidence	Global	Maternal sepsis and other maternal infections	Female	15 to 19	2000	1280.9253867793
Incidence	Global	Maternal sepsis and other maternal infections	Female	15 to 19	2001	1253.62746858671
Incidence	Global	Maternal sepsis and other maternal infections	Female	15 to 19	2002	1225.25236938577
Incidence	Global	Maternal sepsis and other maternal infections	Female	15 to 19	2003	1199.30899873706
Incidence	Global	Maternal sepsis and other maternal infections	Female	15 to 19	2004	1177.97674410815
Incidence	Global	Maternal sepsis and other maternal infections	Female	15 to 19	2005	1162.59684779211
Incidence	Global	Maternal sepsis and other maternal infections	Female	15 to 19	2006	1152.84311513582
Incidence	Global	Maternal sepsis and other maternal infections	Female	15 to 19	2007	1145.31879466545
Incidence	Global	Maternal sepsis and other maternal infections	Female	15 to 19	2008	1138.15602572702
Incidence	Global	Maternal sepsis and other maternal infections	Female	15 to 19	2009	1129.6423485406
Incidence	Global	Maternal sepsis and other maternal infections	Female	15 to 19	2010	1118.09453225321
Incidence	Global	Maternal sepsis and other maternal infections	Female	15 to 19	2011	1099.00486332378
Incidence	Global	Maternal sepsis and other maternal infections	Female	15 to 19	2012	1071.43615088737
Incidence	Global	Maternal sepsis and other maternal infections	Female	15 to 19	2013	1038.97082693148
Incidence	Global	Maternal sepsis and other maternal infections	Female	15 to 19	2014	1005.21976598282
Incidence	Global	Maternal sepsis and other maternal infections	Female	15 to 19	2015	973.586287523666
Incidence	Global	Maternal sepsis and other maternal infections	Female	15 to 19	2016	941.191482791096
Incidence	Global	Maternal sepsis and other maternal infections	Female	15 to 19	2017	904.898691987116
Incidence	Global	Maternal sepsis and other maternal infections	Female	15 to 19	2018	868.157837958542
Incidence	Global	Maternal sepsis and other maternal infections	Female	15 to 19	2019	834.411023710567
Incidence	Global	Maternal sepsis and other maternal infections	Female	15 to 19	2020	803.97156545503
Incidence	Global	Maternal sepsis and other maternal infections	Female	15 to 19	2021	784.097210401357
Incidence	Global	Maternal sepsis and other maternal infections	Female	15 to 19	2022	826.911976433616
Incidence	Global	Maternal sepsis and other maternal infections	Female	15 to 19	2023	822.997936914704
Incidence	Global	Maternal sepsis and other maternal infections	Female	15 to 19	2024	819.083897395793
Incidence	Global	Maternal sepsis and other maternal infections	Female	15 to 19	2025	816.196600943553
Incidence	Global	Maternal sepsis and other maternal infections	Female	15 to 19	2026	813.309304491313
Incidence	Global	Maternal sepsis and other maternal infections	Female	15 to 19	2027	810.422008039072
Incidence	Global	Maternal sepsis and other maternal infections	Female	15 to 19	2028	807.534711586832
Incidence	Global	Maternal sepsis and other maternal infections	Female	15 to 19	2029	804.647415134592
Incidence	Global	Maternal sepsis and other maternal infections	Female	15 to 19	2030	802.74527526442
Incidence	Global	Maternal sepsis and other maternal infections	Female	15 to 19	2031	800.843135394247
Incidence	Global	Maternal sepsis and other maternal infections	Female	15 to 19	2032	798.940995524075
Incidence	Global	Maternal sepsis and other maternal infections	Female	15 to 19	2033	797.038855653903
Incidence	Global	Maternal sepsis and other maternal infections	Female	15 to 19	2034	795.13671578373
Incidence	Global	Maternal sepsis and other maternal infections	Female	15 to 19	2035	794.192414715905
Incidence	Global	Maternal sepsis and other maternal infections	Female	15 to 19	2036	793.248113648079
Incidence	Global	Maternal sepsis and other maternal infections	Female	15 to 19	2037	792.303812580253
Incidence	Global	Maternal sepsis and other maternal infections	Female	15 to 19	2038	791.359511512428
Incidence	Global	Maternal sepsis and other maternal infections	Female	15 to 19	2039	790.415210444602
Incidence	Global	Maternal sepsis and other maternal infections	Female	15 to 19	2040	789.47540050573
Incidence	Global	Maternal sepsis and other maternal infections	Female	15 to 19	2041	788.535590566857
Incidence	Global	Maternal sepsis and other maternal infections	Female	15 to 19	2042	787.595780627985
Incidence	Global	Maternal sepsis and other maternal infections	Female	15 to 19	2043	786.655970689112
Incidence	Global	Maternal sepsis and other maternal infections	Female	15 to 19	2044	785.71616075024
Incidence	Global	Maternal sepsis and other maternal infections	Female	20 to 24	1992	3585.86325250895
Incidence	Global	Maternal sepsis and other maternal infections	Female	20 to 24	1993	3497.57336571518
Incidence	Global	Maternal sepsis and other maternal infections	Female	20 to 24	1994	3421.36008508999
Incidence	Global	Maternal sepsis and other maternal infections	Female	20 to 24	1995	3358.96453530471
Incidence	Global	Maternal sepsis and other maternal infections	Female	20 to 24	1996	3304.36490722105
Incidence	Global	Maternal sepsis and other maternal infections	Female	20 to 24	1997	3251.08740607335
Incidence	Global	Maternal sepsis and other maternal infections	Female	20 to 24	1998	3201.74291375563
Incidence	Global	Maternal sepsis and other maternal infections	Female	20 to 24	1999	3157.25106991198
Incidence	Global	Maternal sepsis and other maternal infections	Female	20 to 24	2000	3118.90439681955
Incidence	Global	Maternal sepsis and other maternal infections	Female	20 to 24	2001	3081.49760388398
Incidence	Global	Maternal sepsis and other maternal infections	Female	20 to 24	2002	3040.27352068968
Incidence	Global	Maternal sepsis and other maternal infections	Female	20 to 24	2003	2996.71759682701
Incidence	Global	Maternal sepsis and other maternal infections	Female	20 to 24	2004	2952.04261349204
Incidence	Global	Maternal sepsis and other maternal infections	Female	20 to 24	2005	2907.80867719461
Incidence	Global	Maternal sepsis and other maternal infections	Female	20 to 24	2006	2858.14089964019
Incidence	Global	Maternal sepsis and other maternal infections	Female	20 to 24	2007	2800.10753427131
Incidence	Global	Maternal sepsis and other maternal infections	Female	20 to 24	2008	2740.63116450626
Incidence	Global	Maternal sepsis and other maternal infections	Female	20 to 24	2009	2687.71880172109
Incidence	Global	Maternal sepsis and other maternal infections	Female	20 to 24	2010	2648.49896558866
Incidence	Global	Maternal sepsis and other maternal infections	Female	20 to 24	2011	2619.21033100615
Incidence	Global	Maternal sepsis and other maternal infections	Female	20 to 24	2012	2590.13099813283
Incidence	Global	Maternal sepsis and other maternal infections	Female	20 to 24	2013	2560.11197153161
Incidence	Global	Maternal sepsis and other maternal infections	Female	20 to 24	2014	2527.52034972878
Incidence	Global	Maternal sepsis and other maternal infections	Female	20 to 24	2015	2491.01198274417
Incidence	Global	Maternal sepsis and other maternal infections	Female	20 to 24	2016	2439.48183099868
Incidence	Global	Maternal sepsis and other maternal infections	Female	20 to 24	2017	2370.20301502339
Incidence	Global	Maternal sepsis and other maternal infections	Female	20 to 24	2018	2293.69165446614
Incidence	Global	Maternal sepsis and other maternal infections	Female	20 to 24	2019	2220.20958692672
Incidence	Global	Maternal sepsis and other maternal infections	Female	20 to 24	2020	2153.05012154425
Incidence	Global	Maternal sepsis and other maternal infections	Female	20 to 24	2021	2098.90204574441
Incidence	Global	Maternal sepsis and other maternal infections	Female	20 to 24	2022	2083.65114682274
Incidence	Global	Maternal sepsis and other maternal infections	Female	20 to 24	2023	2035.80069869201
Incidence	Global	Maternal sepsis and other maternal infections	Female	20 to 24	2024	1987.95025056128
Incidence	Global	Maternal sepsis and other maternal infections	Female	20 to 24	2025	1982.07462430053
Incidence	Global	Maternal sepsis and other maternal infections	Female	20 to 24	2026	1976.19899803978
Incidence	Global	Maternal sepsis and other maternal infections	Female	20 to 24	2027	1970.32337177903
Incidence	Global	Maternal sepsis and other maternal infections	Female	20 to 24	2028	1964.44774551828
Incidence	Global	Maternal sepsis and other maternal infections	Female	20 to 24	2029	1958.57211925753
Incidence	Global	Maternal sepsis and other maternal infections	Female	20 to 24	2030	1954.69377946946
Incidence	Global	Maternal sepsis and other maternal infections	Female	20 to 24	2031	1950.8154396814
Incidence	Global	Maternal sepsis and other maternal infections	Female	20 to 24	2032	1946.93709989333
Incidence	Global	Maternal sepsis and other maternal infections	Female	20 to 24	2033	1943.05876010527
Incidence	Global	Maternal sepsis and other maternal infections	Female	20 to 24	2034	1939.1804203172
Incidence	Global	Maternal sepsis and other maternal infections	Female	20 to 24	2035	1937.25280455261
Incidence	Global	Maternal sepsis and other maternal infections	Female	20 to 24	2036	1935.32518878801
Incidence	Global	Maternal sepsis and other maternal infections	Female	20 to 24	2037	1933.39757302342
Incidence	Global	Maternal sepsis and other maternal infections	Female	20 to 24	2038	1931.46995725883
Incidence	Global	Maternal sepsis and other maternal infections	Female	20 to 24	2039	1929.54234149424
Incidence	Global	Maternal sepsis and other maternal infections	Female	20 to 24	2040	1927.6223978401
Incidence	Global	Maternal sepsis and other maternal infections	Female	20 to 24	2041	1925.70245418597
Incidence	Global	Maternal sepsis and other maternal infections	Female	20 to 24	2042	1923.78251053183
Incidence	Global	Maternal sepsis and other maternal infections	Female	20 to 24	2043	1921.8625668777
Incidence	Global	Maternal sepsis and other maternal infections	Female	20 to 24	2044	1919.94262322356
Incidence	Global	Maternal sepsis and other maternal infections	Female	25 to 29	1992	2259.78080198654
Incidence	Global	Maternal sepsis and other maternal infections	Female	25 to 29	1993	2198.32
Incidence	Global	Maternal sepsis and other maternal infections	Female	25 to 29	1994	2149.6698371443
Incidence	Global	Maternal sepsis and other maternal infections	Female	25 to 29	1995	2115.50622710189
Incidence	Global	Maternal sepsis and other maternal infections	Female	25 to 29	1996	2089.4459452531
Incidence	Global	Maternal sepsis and other maternal infections	Female	25 to 29	1997	2066.19071174122
Incidence	Global	Maternal sepsis and other maternal infections	Female	25 to 29	1998	2044.99866811122
Incidence	Global	Maternal sepsis and other maternal infections	Female	25 to 29	1999	2026.40327796725
Incidence	Global	Maternal sepsis and other maternal infections	Female	25 to 29	2000	2011.54774910167
Incidence	Global	Maternal sepsis and other maternal infections	Female	25 to 29	2001	1998.55693325165
Incidence	Global	Maternal sepsis and other maternal infections	Female	25 to 29	2002	1985.33333758574
Incidence	Global	Maternal sepsis and other maternal infections	Female	25 to 29	2003	1972.67812324733
Incidence	Global	Maternal sepsis and other maternal infections	Female	25 to 29	2004	1960.21852168903
Incidence	Global	Maternal sepsis and other maternal infections	Female	25 to 29	2005	1949.37777026966
Incidence	Global	Maternal sepsis and other maternal infections	Female	25 to 29	2006	1937.25304690321
Incidence	Global	Maternal sepsis and other maternal infections	Female	25 to 29	2007	1920.66088776475
Incidence	Global	Maternal sepsis and other maternal infections	Female	25 to 29	2008	1901.56427314817
Incidence	Global	Maternal sepsis and other maternal infections	Female	25 to 29	2009	1882.76581008315
Incidence	Global	Maternal sepsis and other maternal infections	Female	25 to 29	2010	1867.30507177679
Incidence	Global	Maternal sepsis and other maternal infections	Female	25 to 29	2011	1860.40556416655
Incidence	Global	Maternal sepsis and other maternal infections	Female	25 to 29	2012	1863.37655109117
Incidence	Global	Maternal sepsis and other maternal infections	Female	25 to 29	2013	1871.39189624246
Incidence	Global	Maternal sepsis and other maternal infections	Female	25 to 29	2014	1877.30224260042
Incidence	Global	Maternal sepsis and other maternal infections	Female	25 to 29	2015	1872.60839178519
Incidence	Global	Maternal sepsis and other maternal infections	Female	25 to 29	2016	1853.21969810787
Incidence	Global	Maternal sepsis and other maternal infections	Female	25 to 29	2017	1824.48319253429
Incidence	Global	Maternal sepsis and other maternal infections	Female	25 to 29	2018	1792.61917085493
Incidence	Global	Maternal sepsis and other maternal infections	Female	25 to 29	2019	1763.34065937698
Incidence	Global	Maternal sepsis and other maternal infections	Female	25 to 29	2020	1732.24395217958
Incidence	Global	Maternal sepsis and other maternal infections	Female	25 to 29	2021	1730.13569356626
Incidence	Global	Maternal sepsis and other maternal infections	Female	25 to 29	2022	1620.96374560248
Incidence	Global	Maternal sepsis and other maternal infections	Female	25 to 29	2023	1571.62469457478
Incidence	Global	Maternal sepsis and other maternal infections	Female	25 to 29	2024	1522.28564354708
Incidence	Global	Maternal sepsis and other maternal infections	Female	25 to 29	2025	1484.01688164245
Incidence	Global	Maternal sepsis and other maternal infections	Female	25 to 29	2026	1445.74811973781
Incidence	Global	Maternal sepsis and other maternal infections	Female	25 to 29	2027	1407.47935783318
Incidence	Global	Maternal sepsis and other maternal infections	Female	25 to 29	2028	1369.21059592855
Incidence	Global	Maternal sepsis and other maternal infections	Female	25 to 29	2029	1330.94183402392
Incidence	Global	Maternal sepsis and other maternal infections	Female	25 to 29	2030	1328.09552042118
Incidence	Global	Maternal sepsis and other maternal infections	Female	25 to 29	2031	1325.24920681843
Incidence	Global	Maternal sepsis and other maternal infections	Female	25 to 29	2032	1322.40289321569
Incidence	Global	Maternal sepsis and other maternal infections	Female	25 to 29	2033	1319.55657961295
Incidence	Global	Maternal sepsis and other maternal infections	Female	25 to 29	2034	1316.71026601021
Incidence	Global	Maternal sepsis and other maternal infections	Female	25 to 29	2035	1315.29626920571
Incidence	Global	Maternal sepsis and other maternal infections	Female	25 to 29	2036	1313.88227240122
Incidence	Global	Maternal sepsis and other maternal infections	Female	25 to 29	2037	1312.46827559672
Incidence	Global	Maternal sepsis and other maternal infections	Female	25 to 29	2038	1311.05427879223
Incidence	Global	Maternal sepsis and other maternal infections	Female	25 to 29	2039	1309.64028198773
Incidence	Global	Maternal sepsis and other maternal infections	Female	25 to 29	2040	1308.23236560227
Incidence	Global	Maternal sepsis and other maternal infections	Female	25 to 29	2041	1306.82444921682
Incidence	Global	Maternal sepsis and other maternal infections	Female	25 to 29	2042	1305.41653283136
Incidence	Global	Maternal sepsis and other maternal infections	Female	25 to 29	2043	1304.0086164459
Incidence	Global	Maternal sepsis and other maternal infections	Female	25 to 29	2044	1302.60070006044
Incidence	Global	Maternal sepsis and other maternal infections	Female	30 to 34	1992	1137.60610737223
Incidence	Global	Maternal sepsis and other maternal infections	Female	30 to 34	1993	1102.59406909295
Incidence	Global	Maternal sepsis and other maternal infections	Female	30 to 34	1994	1071.51107650883
Incidence	Global	Maternal sepsis and other maternal infections	Female	30 to 34	1995	1049.33260928825
Incidence	Global	Maternal sepsis and other maternal infections	Female	30 to 34	1996	1036.05430864511
Incidence	Global	Maternal sepsis and other maternal infections	Female	30 to 34	1997	1027.73007784585
Incidence	Global	Maternal sepsis and other maternal infections	Female	30 to 34	1998	1024.31613287649
Incidence	Global	Maternal sepsis and other maternal infections	Female	30 to 34	1999	1023.45231072908
Incidence	Global	Maternal sepsis and other maternal infections	Female	30 to 34	2000	1023.58333178941
Incidence	Global	Maternal sepsis and other maternal infections	Female	30 to 34	2001	1023.65023534192
Incidence	Global	Maternal sepsis and other maternal infections	Female	30 to 34	2002	1023.99534685661
Incidence	Global	Maternal sepsis and other maternal infections	Female	30 to 34	2003	1024.15959564985
Incidence	Global	Maternal sepsis and other maternal infections	Female	30 to 34	2004	1024.50212188738
Incidence	Global	Maternal sepsis and other maternal infections	Female	30 to 34	2005	1026.25585119133
Incidence	Global	Maternal sepsis and other maternal infections	Female	30 to 34	2006	1028.85194213906
Incidence	Global	Maternal sepsis and other maternal infections	Female	30 to 34	2007	1031.37210016927
Incidence	Global	Maternal sepsis and other maternal infections	Female	30 to 34	2008	1034.25441451963
Incidence	Global	Maternal sepsis and other maternal infections	Female	30 to 34	2009	1037.69245239446
Incidence	Global	Maternal sepsis and other maternal infections	Female	30 to 34	2010	1042.91006340527
Incidence	Global	Maternal sepsis and other maternal infections	Female	30 to 34	2011	1052.55483112336
Incidence	Global	Maternal sepsis and other maternal infections	Female	30 to 34	2012	1065.31767681514
Incidence	Global	Maternal sepsis and other maternal infections	Female	30 to 34	2013	1077.48118703601
Incidence	Global	Maternal sepsis and other maternal infections	Female	30 to 34	2014	1085.89199511343
Incidence	Global	Maternal sepsis and other maternal infections	Female	30 to 34	2015	1087.56040264948
Incidence	Global	Maternal sepsis and other maternal infections	Female	30 to 34	2016	1081.9180701458
Incidence	Global	Maternal sepsis and other maternal infections	Female	30 to 34	2017	1072.54824373422
Incidence	Global	Maternal sepsis and other maternal infections	Female	30 to 34	2018	1062.23
Incidence	Global	Maternal sepsis and other maternal infections	Female	30 to 34	2019	1053.43863688488
Incidence	Global	Maternal sepsis and other maternal infections	Female	30 to 34	2020	1042.35097943967
Incidence	Global	Maternal sepsis and other maternal infections	Female	30 to 34	2021	1049.84851445652
Incidence	Global	Maternal sepsis and other maternal infections	Female	30 to 34	2022	994.622338943786
Incidence	Global	Maternal sepsis and other maternal infections	Female	30 to 34	2023	974.185347182503
Incidence	Global	Maternal sepsis and other maternal infections	Female	30 to 34	2024	953.748355421219
Incidence	Global	Maternal sepsis and other maternal infections	Female	30 to 34	2025	927.512470246869
Incidence	Global	Maternal sepsis and other maternal infections	Female	30 to 34	2026	901.276585072519
Incidence	Global	Maternal sepsis and other maternal infections	Female	30 to 34	2027	875.040699898169
Incidence	Global	Maternal sepsis and other maternal infections	Female	30 to 34	2028	848.804814723819
Incidence	Global	Maternal sepsis and other maternal infections	Female	30 to 34	2029	822.568929549469
Incidence	Global	Maternal sepsis and other maternal infections	Female	30 to 34	2030	800.206348915716
Incidence	Global	Maternal sepsis and other maternal infections	Female	30 to 34	2031	777.843768281963
Incidence	Global	Maternal sepsis and other maternal infections	Female	30 to 34	2032	755.481187648211
Incidence	Global	Maternal sepsis and other maternal infections	Female	30 to 34	2033	733.118607014458
Incidence	Global	Maternal sepsis and other maternal infections	Female	30 to 34	2034	710.756026380705
Incidence	Global	Maternal sepsis and other maternal infections	Female	30 to 34	2035	709.892829199699
Incidence	Global	Maternal sepsis and other maternal infections	Female	30 to 34	2036	709.029632018693
Incidence	Global	Maternal sepsis and other maternal infections	Female	30 to 34	2037	708.166434837687
Incidence	Global	Maternal sepsis and other maternal infections	Female	30 to 34	2038	707.303237656681
Incidence	Global	Maternal sepsis and other maternal infections	Female	30 to 34	2039	706.440040475675
Incidence	Global	Maternal sepsis and other maternal infections	Female	30 to 34	2040	705.58104173079
Incidence	Global	Maternal sepsis and other maternal infections	Female	30 to 34	2041	704.722042985905
Incidence	Global	Maternal sepsis and other maternal infections	Female	30 to 34	2042	703.863044241021
Incidence	Global	Maternal sepsis and other maternal infections	Female	30 to 34	2043	703.004045496136
Incidence	Global	Maternal sepsis and other maternal infections	Female	30 to 34	2044	702.145046751252
Incidence	Global	Maternal sepsis and other maternal infections	Female	35 to 39	1992	597.451225202031
Incidence	Global	Maternal sepsis and other maternal infections	Female	35 to 39	1993	586.064394211644
Incidence	Global	Maternal sepsis and other maternal infections	Female	35 to 39	1994	580.59355535447
Incidence	Global	Maternal sepsis and other maternal infections	Female	35 to 39	1995	580.077267192014
Incidence	Global	Maternal sepsis and other maternal infections	Female	35 to 39	1996	578.734238181322
Incidence	Global	Maternal sepsis and other maternal infections	Female	35 to 39	1997	571.648381892826
Incidence	Global	Maternal sepsis and other maternal infections	Female	35 to 39	1998	559.28410560882
Incidence	Global	Maternal sepsis and other maternal infections	Female	35 to 39	1999	545.98809654998
Incidence	Global	Maternal sepsis and other maternal infections	Female	35 to 39	2000	534.954438387048
Incidence	Global	Maternal sepsis and other maternal infections	Female	35 to 39	2001	527.789243697504
Incidence	Global	Maternal sepsis and other maternal infections	Female	35 to 39	2002	523.865293345411
Incidence	Global	Maternal sepsis and other maternal infections	Female	35 to 39	2003	523.283600602022
Incidence	Global	Maternal sepsis and other maternal infections	Female	35 to 39	2004	524.380598357518
Incidence	Global	Maternal sepsis and other maternal infections	Female	35 to 39	2005	525.97567921421
Incidence	Global	Maternal sepsis and other maternal infections	Female	35 to 39	2006	526.92008679116
Incidence	Global	Maternal sepsis and other maternal infections	Female	35 to 39	2007	527.638035513299
Incidence	Global	Maternal sepsis and other maternal infections	Female	35 to 39	2008	528.412932210004
Incidence	Global	Maternal sepsis and other maternal infections	Female	35 to 39	2009	530.267840967399
Incidence	Global	Maternal sepsis and other maternal infections	Female	35 to 39	2010	534.356759172075
Incidence	Global	Maternal sepsis and other maternal infections	Female	35 to 39	2011	541.904208065777
Incidence	Global	Maternal sepsis and other maternal infections	Female	35 to 39	2012	551.773590133427
Incidence	Global	Maternal sepsis and other maternal infections	Female	35 to 39	2013	561.693308559763
Incidence	Global	Maternal sepsis and other maternal infections	Female	35 to 39	2014	569.397824291247
Incidence	Global	Maternal sepsis and other maternal infections	Female	35 to 39	2015	573.371839482103
Incidence	Global	Maternal sepsis and other maternal infections	Female	35 to 39	2016	573.343129906213
Incidence	Global	Maternal sepsis and other maternal infections	Female	35 to 39	2017	570.36676401387
Incidence	Global	Maternal sepsis and other maternal infections	Female	35 to 39	2018	565.519172980671
Incidence	Global	Maternal sepsis and other maternal infections	Female	35 to 39	2019	560.116803320096
Incidence	Global	Maternal sepsis and other maternal infections	Female	35 to 39	2020	553.449378265409
Incidence	Global	Maternal sepsis and other maternal infections	Female	35 to 39	2021	548.676456469438
Incidence	Global	Maternal sepsis and other maternal infections	Female	35 to 39	2022	543.376908255152
Incidence	Global	Maternal sepsis and other maternal infections	Female	35 to 39	2023	538.033410562761
Incidence	Global	Maternal sepsis and other maternal infections	Female	35 to 39	2024	532.689912870369
Incidence	Global	Maternal sepsis and other maternal infections	Female	35 to 39	2025	524.61669726493
Incidence	Global	Maternal sepsis and other maternal infections	Female	35 to 39	2026	516.543481659491
Incidence	Global	Maternal sepsis and other maternal infections	Female	35 to 39	2027	508.470266054052
Incidence	Global	Maternal sepsis and other maternal infections	Female	35 to 39	2028	500.397050448613
Incidence	Global	Maternal sepsis and other maternal infections	Female	35 to 39	2029	492.323834843174
Incidence	Global	Maternal sepsis and other maternal infections	Female	35 to 39	2030	477.557749653843
Incidence	Global	Maternal sepsis and other maternal infections	Female	35 to 39	2031	462.791664464512
Incidence	Global	Maternal sepsis and other maternal infections	Female	35 to 39	2032	448.025579275181
Incidence	Global	Maternal sepsis and other maternal infections	Female	35 to 39	2033	433.259494085851
Incidence	Global	Maternal sepsis and other maternal infections	Female	35 to 39	2034	418.49340889652
Incidence	Global	Maternal sepsis and other maternal infections	Female	35 to 39	2035	406.074474478177
Incidence	Global	Maternal sepsis and other maternal infections	Female	35 to 39	2036	393.655540059835
Incidence	Global	Maternal sepsis and other maternal infections	Female	35 to 39	2037	381.236605641492
Incidence	Global	Maternal sepsis and other maternal infections	Female	35 to 39	2038	368.817671223149
Incidence	Global	Maternal sepsis and other maternal infections	Female	35 to 39	2039	356.398736804807
Incidence	Global	Maternal sepsis and other maternal infections	Female	35 to 39	2040	355.902000442206
Incidence	Global	Maternal sepsis and other maternal infections	Female	35 to 39	2041	355.405264079605
Incidence	Global	Maternal sepsis and other maternal infections	Female	35 to 39	2042	354.908527717004
Incidence	Global	Maternal sepsis and other maternal infections	Female	35 to 39	2043	354.411791354403
Incidence	Global	Maternal sepsis and other maternal infections	Female	35 to 39	2044	353.915054991802
Incidence	Global	Maternal sepsis and other maternal infections	Female	40 to 44	1992	289.73783481005
Incidence	Global	Maternal sepsis and other maternal infections	Female	40 to 44	1993	279.31413356932
Incidence	Global	Maternal sepsis and other maternal infections	Female	40 to 44	1994	272.180442174615
Incidence	Global	Maternal sepsis and other maternal infections	Female	40 to 44	1995	265.163229222035
Incidence	Global	Maternal sepsis and other maternal infections	Female	40 to 44	1996	259.984915202357
Incidence	Global	Maternal sepsis and other maternal infections	Female	40 to 44	1997	256.201797663862
Incidence	Global	Maternal sepsis and other maternal infections	Female	40 to 44	1998	254.190303433565
Incidence	Global	Maternal sepsis and other maternal infections	Female	40 to 44	1999	253.433648284877
Incidence	Global	Maternal sepsis and other maternal infections	Female	40 to 44	2000	253.249541884318
Incidence	Global	Maternal sepsis and other maternal infections	Female	40 to 44	2001	252.096743959142
Incidence	Global	Maternal sepsis and other maternal infections	Female	40 to 44	2002	248.935666887117
Incidence	Global	Maternal sepsis and other maternal infections	Female	40 to 44	2003	243.800015014301
Incidence	Global	Maternal sepsis and other maternal infections	Female	40 to 44	2004	238.270997594696
Incidence	Global	Maternal sepsis and other maternal infections	Female	40 to 44	2005	233.473502049439
Incidence	Global	Maternal sepsis and other maternal infections	Female	40 to 44	2006	229.862646272214
Incidence	Global	Maternal sepsis and other maternal infections	Female	40 to 44	2007	227.252440163333
Incidence	Global	Maternal sepsis and other maternal infections	Female	40 to 44	2008	226.082215134608
Incidence	Global	Maternal sepsis and other maternal infections	Female	40 to 44	2009	226.02576815223
Incidence	Global	Maternal sepsis and other maternal infections	Female	40 to 44	2010	226.931712891444
Incidence	Global	Maternal sepsis and other maternal infections	Female	40 to 44	2011	228.500050516877
Incidence	Global	Maternal sepsis and other maternal infections	Female	40 to 44	2012	230.596786635185
Incidence	Global	Maternal sepsis and other maternal infections	Female	40 to 44	2013	232.786654917125
Incidence	Global	Maternal sepsis and other maternal infections	Female	40 to 44	2014	234.857936416498
Incidence	Global	Maternal sepsis and other maternal infections	Female	40 to 44	2015	236.666243193066
Incidence	Global	Maternal sepsis and other maternal infections	Female	40 to 44	2016	237.918562031983
Incidence	Global	Maternal sepsis and other maternal infections	Female	40 to 44	2017	238.482240002324
Incidence	Global	Maternal sepsis and other maternal infections	Female	40 to 44	2018	238.537960956862
Incidence	Global	Maternal sepsis and other maternal infections	Female	40 to 44	2019	238.312312775521
Incidence	Global	Maternal sepsis and other maternal infections	Female	40 to 44	2020	237.731900818006
Incidence	Global	Maternal sepsis and other maternal infections	Female	40 to 44	2021	236.390408052796
Incidence	Global	Maternal sepsis and other maternal infections	Female	40 to 44	2022	244.213510176952
Incidence	Global	Maternal sepsis and other maternal infections	Female	40 to 44	2023	246.32391530162
Incidence	Global	Maternal sepsis and other maternal infections	Female	40 to 44	2024	248.434320426289
Incidence	Global	Maternal sepsis and other maternal infections	Female	40 to 44	2025	245.050491404067
Incidence	Global	Maternal sepsis and other maternal infections	Female	40 to 44	2026	241.666662381844
Incidence	Global	Maternal sepsis and other maternal infections	Female	40 to 44	2027	238.282833359622
Incidence	Global	Maternal sepsis and other maternal infections	Female	40 to 44	2028	234.899004337399
Incidence	Global	Maternal sepsis and other maternal infections	Female	40 to 44	2029	231.515175315177
Incidence	Global	Maternal sepsis and other maternal infections	Female	40 to 44	2030	227.721963880824
Incidence	Global	Maternal sepsis and other maternal infections	Female	40 to 44	2031	223.928752446472
Incidence	Global	Maternal sepsis and other maternal infections	Female	40 to 44	2032	220.135541012119
Incidence	Global	Maternal sepsis and other maternal infections	Female	40 to 44	2033	216.342329577766
Incidence	Global	Maternal sepsis and other maternal infections	Female	40 to 44	2034	212.549118143414
Incidence	Global	Maternal sepsis and other maternal infections	Female	40 to 44	2035	205.378961962108
Incidence	Global	Maternal sepsis and other maternal infections	Female	40 to 44	2036	198.208805780802
Incidence	Global	Maternal sepsis and other maternal infections	Female	40 to 44	2037	191.038649599497
Incidence	Global	Maternal sepsis and other maternal infections	Female	40 to 44	2038	183.868493418191
Incidence	Global	Maternal sepsis and other maternal infections	Female	40 to 44	2039	176.698337236885
Incidence	Global	Maternal sepsis and other maternal infections	Female	40 to 44	2040	170.541538757464
Incidence	Global	Maternal sepsis and other maternal infections	Female	40 to 44	2041	164.384740278043
Incidence	Global	Maternal sepsis and other maternal infections	Female	40 to 44	2042	158.227941798622
Incidence	Global	Maternal sepsis and other maternal infections	Female	40 to 44	2043	152.071143319201
Incidence	Global	Maternal sepsis and other maternal infections	Female	40 to 44	2044	145.91434483978
Incidence	Global	Maternal sepsis and other maternal infections	Female	45 to 49	1992	120.956602711705
Incidence	Global	Maternal sepsis and other maternal infections	Female	45 to 49	1993	113.952235973568
Incidence	Global	Maternal sepsis and other maternal infections	Female	45 to 49	1994	106.354811380514
Incidence	Global	Maternal sepsis and other maternal infections	Female	45 to 49	1995	101.412153128964
Incidence	Global	Maternal sepsis and other maternal infections	Female	45 to 49	1996	97.7974927596555
Incidence	Global	Maternal sepsis and other maternal infections	Female	45 to 49	1997	95.226232820033
Incidence	Global	Maternal sepsis and other maternal infections	Female	45 to 49	1998	92.4227056022288
Incidence	Global	Maternal sepsis and other maternal infections	Female	45 to 49	1999	90.3724065724731
Incidence	Global	Maternal sepsis and other maternal infections	Female	45 to 49	2000	87.6076441397898
Incidence	Global	Maternal sepsis and other maternal infections	Female	45 to 49	2001	85.5636220266811
Incidence	Global	Maternal sepsis and other maternal infections	Female	45 to 49	2002	84.323093347722
Incidence	Global	Maternal sepsis and other maternal infections	Female	45 to 49	2003	83.7697190906009
Incidence	Global	Maternal sepsis and other maternal infections	Female	45 to 49	2004	83.5060936134073
Incidence	Global	Maternal sepsis and other maternal infections	Female	45 to 49	2005	83.1298886841563
Incidence	Global	Maternal sepsis and other maternal infections	Female	45 to 49	2006	82.1527991058748
Incidence	Global	Maternal sepsis and other maternal infections	Female	45 to 49	2007	80.4686552329133
Incidence	Global	Maternal sepsis and other maternal infections	Female	45 to 49	2008	78.2850747290377
Incidence	Global	Maternal sepsis and other maternal infections	Female	45 to 49	2009	76.1140496691997
Incidence	Global	Maternal sepsis and other maternal infections	Female	45 to 49	2010	74.3021560678666
Incidence	Global	Maternal sepsis and other maternal infections	Female	45 to 49	2011	72.9263035019594
Incidence	Global	Maternal sepsis and other maternal infections	Female	45 to 49	2012	71.7216015435326
Incidence	Global	Maternal sepsis and other maternal infections	Female	45 to 49	2013	70.7619456813664
Incidence	Global	Maternal sepsis and other maternal infections	Female	45 to 49	2014	69.9573079654098
Incidence	Global	Maternal sepsis and other maternal infections	Female	45 to 49	2015	69.2411399110356
Incidence	Global	Maternal sepsis and other maternal infections	Female	45 to 49	2016	68.4529662648094
Incidence	Global	Maternal sepsis and other maternal infections	Female	45 to 49	2017	67.7076572644606
Incidence	Global	Maternal sepsis and other maternal infections	Female	45 to 49	2018	67.0042720965041
Incidence	Global	Maternal sepsis and other maternal infections	Female	45 to 49	2019	66.3841842585376
Incidence	Global	Maternal sepsis and other maternal infections	Female	45 to 49	2020	65.9177733847305
Incidence	Global	Maternal sepsis and other maternal infections	Female	45 to 49	2021	65.2247984588875
Incidence	Global	Maternal sepsis and other maternal infections	Female	45 to 49	2022	71.8943407578236
Incidence	Global	Maternal sepsis and other maternal infections	Female	45 to 49	2023	73.7122623959797
Incidence	Global	Maternal sepsis and other maternal infections	Female	45 to 49	2024	75.5301840341358
Incidence	Global	Maternal sepsis and other maternal infections	Female	45 to 49	2025	76.0814921940486
Incidence	Global	Maternal sepsis and other maternal infections	Female	45 to 49	2026	76.6328003539615
Incidence	Global	Maternal sepsis and other maternal infections	Female	45 to 49	2027	77.1841085138743
Incidence	Global	Maternal sepsis and other maternal infections	Female	45 to 49	2028	77.7354166737871
Incidence	Global	Maternal sepsis and other maternal infections	Female	45 to 49	2029	78.2867
Incidence	Global	Maternal sepsis and other maternal infections	Female	45 to 49	2030	77.0916257666207
Incidence	Global	Maternal sepsis and other maternal infections	Female	45 to 49	2031	75.8965266995415
Incidence	Global	Maternal sepsis and other maternal infections	Female	45 to 49	2032	74.7014276324622
Incidence	Global	Maternal sepsis and other maternal infections	Female	45 to 49	2033	73.506328565383
Incidence	Global	Maternal sepsis and other maternal infections	Female	45 to 49	2034	72.3112294983037
Incidence	Global	Maternal sepsis and other maternal infections	Female	45 to 49	2035	70.9572463960353
Incidence	Global	Maternal sepsis and other maternal infections	Female	45 to 49	2036	69.6032632937669
Incidence	Global	Maternal sepsis and other maternal infections	Female	45 to 49	2037	68.2492801914985
Incidence	Global	Maternal sepsis and other maternal infections	Female	45 to 49	2038	66.8952970892301
Incidence	Global	Maternal sepsis and other maternal infections	Female	45 to 49	2039	65.5413139869617
Incidence	Global	Maternal sepsis and other maternal infections	Female	45 to 49	2040	62.7970700420206
Incidence	Global	Maternal sepsis and other maternal infections	Female	45 to 49	2041	60.0528260970795
Incidence	Global	Maternal sepsis and other maternal infections	Female	45 to 49	2042	57.3085821521384
Incidence	Global	Maternal sepsis and other maternal infections	Female	45 to 49	2043	54.5643382071973
Incidence	Global	Maternal sepsis and other maternal infections	Female	45 to 49	2044	51.8200942622562
Incidence	Global	Maternal hemorrhage	Female	15 to 19	1992	666.804193682969
Incidence	Global	Maternal hemorrhage	Female	15 to 19	1993	660.893607618557
Incidence	Global	Maternal hemorrhage	Female	15 to 19	1994	655.419389405206
Incidence	Global	Maternal hemorrhage	Female	15 to 19	1995	650.717470653835
Incidence	Global	Maternal hemorrhage	Female	15 to 19	1996	646.058078334798
Incidence	Global	Maternal hemorrhage	Female	15 to 19	1997	640.094847650356
Incidence	Global	Maternal hemorrhage	Female	15 to 19	1998	632.819243560523
Incidence	Global	Maternal hemorrhage	Female	15 to 19	1999	624.534439506386
Incidence	Global	Maternal hemorrhage	Female	15 to 19	2000	615.679354546234
Incidence	Global	Maternal hemorrhage	Female	15 to 19	2001	605.151652028047
Incidence	Global	Maternal hemorrhage	Female	15 to 19	2002	593.373229227857
Incidence	Global	Maternal hemorrhage	Female	15 to 19	2003	582.256323835691
Incidence	Global	Maternal hemorrhage	Female	15 to 19	2004	573.047052724878
Incidence	Global	Maternal hemorrhage	Female	15 to 19	2005	566.654894911347
Incidence	Global	Maternal hemorrhage	Female	15 to 19	2006	563.11802315512
Incidence	Global	Maternal hemorrhage	Female	15 to 19	2007	560.883684257178
Incidence	Global	Maternal hemorrhage	Female	15 to 19	2008	559.117638017597
Incidence	Global	Maternal hemorrhage	Female	15 to 19	2009	556.987283492803
Incidence	Global	Maternal hemorrhage	Female	15 to 19	2010	553.816433843183
Incidence	Global	Maternal hemorrhage	Female	15 to 19	2011	547.151899369639
Incidence	Global	Maternal hemorrhage	Female	15 to 19	2012	536.183033194283
Incidence	Global	Maternal hemorrhage	Female	15 to 19	2013	522.683991721598
Incidence	Global	Maternal hemorrhage	Female	15 to 19	2014	508.402529214686
Incidence	Global	Maternal hemorrhage	Female	15 to 19	2015	494.937978100464
Incidence	Global	Maternal hemorrhage	Female	15 to 19	2016	481.362995386082
Incidence	Global	Maternal hemorrhage	Female	15 to 19	2017	466.215288217601
Incidence	Global	Maternal hemorrhage	Female	15 to 19	2018	450.67268254518
Incidence	Global	Maternal hemorrhage	Female	15 to 19	2019	435.981894792057
Incidence	Global	Maternal hemorrhage	Female	15 to 19	2020	421.633017643932
Incidence	Global	Maternal hemorrhage	Female	15 to 19	2021	411.575761426757
Incidence	Global	Maternal hemorrhage	Female	15 to 19	2022	429.232283020513
Incidence	Global	Maternal hemorrhage	Female	15 to 19	2023	426.639866811933
Incidence	Global	Maternal hemorrhage	Female	15 to 19	2024	424.047450603353
Incidence	Global	Maternal hemorrhage	Female	15 to 19	2025	422.143810245531
Incidence	Global	Maternal hemorrhage	Female	15 to 19	2026	420.24016988771
Incidence	Global	Maternal hemorrhage	Female	15 to 19	2027	418.336529529888
Incidence	Global	Maternal hemorrhage	Female	15 to 19	2028	416.432889172067
Incidence	Global	Maternal hemorrhage	Female	15 to 19	2029	414.529248814246
Incidence	Global	Maternal hemorrhage	Female	15 to 19	2030	413.27926074909
Incidence	Global	Maternal hemorrhage	Female	15 to 19	2031	412.029272683935
Incidence	Global	Maternal hemorrhage	Female	15 to 19	2032	410.77928461878
Incidence	Global	Maternal hemorrhage	Female	15 to 19	2033	409.529296553625
Incidence	Global	Maternal hemorrhage	Female	15 to 19	2034	408.279308488469
Incidence	Global	Maternal hemorrhage	Female	15 to 19	2035	407.659994100273
Incidence	Global	Maternal hemorrhage	Female	15 to 19	2036	407.040679712077
Incidence	Global	Maternal hemorrhage	Female	15 to 19	2037	406.42136532388
Incidence	Global	Maternal hemorrhage	Female	15 to 19	2038	405.802050935684
Incidence	Global	Maternal hemorrhage	Female	15 to 19	2039	405.182736547487
Incidence	Global	Maternal hemorrhage	Female	15 to 19	2040	404.567185597054
Incidence	Global	Maternal hemorrhage	Female	15 to 19	2041	403.95163464662
Incidence	Global	Maternal hemorrhage	Female	15 to 19	2042	403.336083696186
Incidence	Global	Maternal hemorrhage	Female	15 to 19	2043	402.720532745752
Incidence	Global	Maternal hemorrhage	Female	15 to 19	2044	402.104981795318
Incidence	Global	Maternal hemorrhage	Female	20 to 24	1992	1692.63019831901
Incidence	Global	Maternal hemorrhage	Female	20 to 24	1993	1653.19893950729
Incidence	Global	Maternal hemorrhage	Female	20 to 24	1994	1620.25734173419
Incidence	Global	Maternal hemorrhage	Female	20 to 24	1995	1595.19506673284
Incidence	Global	Maternal hemorrhage	Female	20 to 24	1996	1579.04350352464
Incidence	Global	Maternal hemorrhage	Female	20 to 24	1997	1569.27598680794
Incidence	Global	Maternal hemorrhage	Female	20 to 24	1998	1563.08954108754
Incidence	Global	Maternal hemorrhage	Female	20 to 24	1999	1556.8039661844
Incidence	Global	Maternal hemorrhage	Female	20 to 24	2000	1546.6195170018
Incidence	Global	Maternal hemorrhage	Female	20 to 24	2001	1528.94582632579
Incidence	Global	Maternal hemorrhage	Female	20 to 24	2002	1504.97592878506
Incidence	Global	Maternal hemorrhage	Female	20 to 24	2003	1477.78460786053
Incidence	Global	Maternal hemorrhage	Female	20 to 24	2004	1450.30334489806
Incidence	Global	Maternal hemorrhage	Female	20 to 24	2005	1425.99507091703
Incidence	Global	Maternal hemorrhage	Female	20 to 24	2006	1403.48073924979
Incidence	Global	Maternal hemorrhage	Female	20 to 24	2007	1380.68914552589
Incidence	Global	Maternal hemorrhage	Female	20 to 24	2008	1359.23513065705
Incidence	Global	Maternal hemorrhage	Female	20 to 24	2009	1340.29385092081
Incidence	Global	Maternal hemorrhage	Female	20 to 24	2010	1324.85052205926
Incidence	Global	Maternal hemorrhage	Female	20 to 24	2011	1312.03355075008
Incidence	Global	Maternal hemorrhage	Female	20 to 24	2012	1299.36798962464
Incidence	Global	Maternal hemorrhage	Female	20 to 24	2013	1286.58087852385
Incidence	Global	Maternal hemorrhage	Female	20 to 24	2014	1273.0887149443
Incidence	Global	Maternal hemorrhage	Female	20 to 24	2015	1258.4304716019
Incidence	Global	Maternal hemorrhage	Female	20 to 24	2016	1238.14558775795
Incidence	Global	Maternal hemorrhage	Female	20 to 24	2017	1210.96908627393
Incidence	Global	Maternal hemorrhage	Female	20 to 24	2018	1181.11748265571
Incidence	Global	Maternal hemorrhage	Female	20 to 24	2019	1152.43885396891
Incidence	Global	Maternal hemorrhage	Female	20 to 24	2020	1122.27739828674
Incidence	Global	Maternal hemorrhage	Female	20 to 24	2021	1097.00769276879
Incidence	Global	Maternal hemorrhage	Female	20 to 24	2022	1089.47325576419
Incidence	Global	Maternal hemorrhage	Female	20 to 24	2023	1068.3787521124
Incidence	Global	Maternal hemorrhage	Female	20 to 24	2024	1047.28424846061
Incidence	Global	Maternal hemorrhage	Female	20 to 24	2025	1043.3545804223
Incidence	Global	Maternal hemorrhage	Female	20 to 24	2026	1039.42491238399
Incidence	Global	Maternal hemorrhage	Female	20 to 24	2027	1035.49524434568
Incidence	Global	Maternal hemorrhage	Female	20 to 24	2028	1031.56557630737
Incidence	Global	Maternal hemorrhage	Female	20 to 24	2029	1027.63590826906
Incidence	Global	Maternal hemorrhage	Female	20 to 24	2030	1025.04906162319
Incidence	Global	Maternal hemorrhage	Female	20 to 24	2031	1022.46221497732
Incidence	Global	Maternal hemorrhage	Female	20 to 24	2032	1019.87536833145
Incidence	Global	Maternal hemorrhage	Female	20 to 24	2033	1017.28852168558
Incidence	Global	Maternal hemorrhage	Female	20 to 24	2034	1014.70167503971
Incidence	Global	Maternal hemorrhage	Female	20 to 24	2035	1013.41805653269
Incidence	Global	Maternal hemorrhage	Female	20 to 24	2036	1012.13443802567
Incidence	Global	Maternal hemorrhage	Female	20 to 24	2037	1010.85081951865
Incidence	Global	Maternal hemorrhage	Female	20 to 24	2038	1009.56720101163
Incidence	Global	Maternal hemorrhage	Female	20 to 24	2039	1008.28358250461
Incidence	Global	Maternal hemorrhage	Female	20 to 24	2040	1007.00646744514
Incidence	Global	Maternal hemorrhage	Female	20 to 24	2041	1005.72935238567
Incidence	Global	Maternal hemorrhage	Female	20 to 24	2042	1004.45223732619
Incidence	Global	Maternal hemorrhage	Female	20 to 24	2043	1003.17512226672
Incidence	Global	Maternal hemorrhage	Female	20 to 24	2044	1001.89800720725
Incidence	Global	Maternal hemorrhage	Female	25 to 29	1992	1658.33043614378
Incidence	Global	Maternal hemorrhage	Female	25 to 29	1993	1615.42137980154
Incidence	Global	Maternal hemorrhage	Female	25 to 29	1994	1582.67131752456
Incidence	Global	Maternal hemorrhage	Female	25 to 29	1995	1561.79727958494
Incidence	Global	Maternal hemorrhage	Female	25 to 29	1996	1549.04170063548
Incidence	Global	Maternal hemorrhage	Female	25 to 29	1997	1540.39674990088
Incidence	Global	Maternal hemorrhage	Female	25 to 29	1998	1533.24326380829
Incidence	Global	Maternal hemorrhage	Female	25 to 29	1999	1527.12581075905
Incidence	Global	Maternal hemorrhage	Female	25 to 29	2000	1522.0853149042
Incidence	Global	Maternal hemorrhage	Female	25 to 29	2001	1514.6215822477
Incidence	Global	Maternal hemorrhage	Female	25 to 29	2002	1503.45535120534
Incidence	Global	Maternal hemorrhage	Female	25 to 29	2003	1491.45773195125
Incidence	Global	Maternal hemorrhage	Female	25 to 29	2004	1480.04366080555
Incidence	Global	Maternal hemorrhage	Female	25 to 29	2005	1471.33349195955
Incidence	Global	Maternal hemorrhage	Female	25 to 29	2006	1466.24334168361
Incidence	Global	Maternal hemorrhage	Female	25 to 29	2007	1462.19060307848
Incidence	Global	Maternal hemorrhage	Female	25 to 29	2008	1457.91423510918
Incidence	Global	Maternal hemorrhage	Female	25 to 29	2009	1453.5142779393
Incidence	Global	Maternal hemorrhage	Female	25 to 29	2010	1449.72111107708
Incidence	Global	Maternal hemorrhage	Female	25 to 29	2011	1448.49562823825
Incidence	Global	Maternal hemorrhage	Female	25 to 29	2012	1451.40775457176
Incidence	Global	Maternal hemorrhage	Female	25 to 29	2013	1455.97414280096
Incidence	Global	Maternal hemorrhage	Female	25 to 29	2014	1458.02537756773
Incidence	Global	Maternal hemorrhage	Female	25 to 29	2015	1452.78227154793
Incidence	Global	Maternal hemorrhage	Female	25 to 29	2016	1440.00436236465
Incidence	Global	Maternal hemorrhage	Female	25 to 29	2017	1423.02532318641
Incidence	Global	Maternal hemorrhage	Female	25 to 29	2018	1403.91163225427
Incidence	Global	Maternal hemorrhage	Female	25 to 29	2019	1384.45396087087
Incidence	Global	Maternal hemorrhage	Female	25 to 29	2020	1358.29236185088
Incidence	Global	Maternal hemorrhage	Female	25 to 29	2021	1350.56223263638
Incidence	Global	Maternal hemorrhage	Female	25 to 29	2022	1295.34544828261
Incidence	Global	Maternal hemorrhage	Female	25 to 29	2023	1265.67234627992
Incidence	Global	Maternal hemorrhage	Female	25 to 29	2024	1235.99924427724
Incidence	Global	Maternal hemorrhage	Female	25 to 29	2025	1212.34260625132
Incidence	Global	Maternal hemorrhage	Female	25 to 29	2026	1188.6859682254
Incidence	Global	Maternal hemorrhage	Female	25 to 29	2027	1165.02933019948
Incidence	Global	Maternal hemorrhage	Female	25 to 29	2028	1141.37269217356
Incidence	Global	Maternal hemorrhage	Female	25 to 29	2029	1117.71605414764
Incidence	Global	Maternal hemorrhage	Female	25 to 29	2030	1114.94910562274
Incidence	Global	Maternal hemorrhage	Female	25 to 29	2031	1112.18215709784
Incidence	Global	Maternal hemorrhage	Female	25 to 29	2032	1109.41520857294
Incidence	Global	Maternal hemorrhage	Female	25 to 29	2033	1106.64826004804
Incidence	Global	Maternal hemorrhage	Female	25 to 29	2034	1103.88131152314
Incidence	Global	Maternal hemorrhage	Female	25 to 29	2035	1102.50815015629
Incidence	Global	Maternal hemorrhage	Female	25 to 29	2036	1101.13498878945
Incidence	Global	Maternal hemorrhage	Female	25 to 29	2037	1099.76182742261
Incidence	Global	Maternal hemorrhage	Female	25 to 29	2038	1098.38866605576
Incidence	Global	Maternal hemorrhage	Female	25 to 29	2039	1097.01550468892
Incidence	Global	Maternal hemorrhage	Female	25 to 29	2040	1095.64918435487
Incidence	Global	Maternal hemorrhage	Female	25 to 29	2041	1094.28286402082
Incidence	Global	Maternal hemorrhage	Female	25 to 29	2042	1092.91654368676
Incidence	Global	Maternal hemorrhage	Female	25 to 29	2043	1091.55022335271
Incidence	Global	Maternal hemorrhage	Female	25 to 29	2044	1090.18390301866
Incidence	Global	Maternal hemorrhage	Female	30 to 34	1992	1165.35713589059
Incidence	Global	Maternal hemorrhage	Female	30 to 34	1993	1135.70689002591
Incidence	Global	Maternal hemorrhage	Female	30 to 34	1994	1106.98408225962
Incidence	Global	Maternal hemorrhage	Female	30 to 34	1995	1084.54849373815
Incidence	Global	Maternal hemorrhage	Female	30 to 34	1996	1070.18968841577
Incidence	Global	Maternal hemorrhage	Female	30 to 34	1997	1061.67164159533
Incidence	Global	Maternal hemorrhage	Female	30 to 34	1998	1059.29916481711
Incidence	Global	Maternal hemorrhage	Female	30 to 34	1999	1060.18434352975
Incidence	Global	Maternal hemorrhage	Female	30 to 34	2000	1062.25093726284
Incidence	Global	Maternal hemorrhage	Female	30 to 34	2001	1063.66205627768
Incidence	Global	Maternal hemorrhage	Female	30 to 34	2002	1064.62313888381
Incidence	Global	Maternal hemorrhage	Female	30 to 34	2003	1064.78721588717
Incidence	Global	Maternal hemorrhage	Female	30 to 34	2004	1064.98371977456
Incidence	Global	Maternal hemorrhage	Female	30 to 34	2005	1066.58763528159
Incidence	Global	Maternal hemorrhage	Female	30 to 34	2006	1069.9296158676
Incidence	Global	Maternal hemorrhage	Female	30 to 34	2007	1074.25790884971
Incidence	Global	Maternal hemorrhage	Female	30 to 34	2008	1078.8493539798
Incidence	Global	Maternal hemorrhage	Female	30 to 34	2009	1083.37080339995
Incidence	Global	Maternal hemorrhage	Female	30 to 34	2010	1088.98620397302
Incidence	Global	Maternal hemorrhage	Female	30 to 34	2011	1096.85101920366
Incidence	Global	Maternal hemorrhage	Female	30 to 34	2012	1104.53833521107
Incidence	Global	Maternal hemorrhage	Female	30 to 34	2013	1110.15778196999
Incidence	Global	Maternal hemorrhage	Female	30 to 34	2014	1112.37462858533
Incidence	Global	Maternal hemorrhage	Female	30 to 34	2015	1109.71453497382
Incidence	Global	Maternal hemorrhage	Female	30 to 34	2016	1102.91106434914
Incidence	Global	Maternal hemorrhage	Female	30 to 34	2017	1095.2315300034
Incidence	Global	Maternal hemorrhage	Female	30 to 34	2018	1087.70928251532
Incidence	Global	Maternal hemorrhage	Female	30 to 34	2019	1080.82228318276
Incidence	Global	Maternal hemorrhage	Female	30 to 34	2020	1069.69811622228
Incidence	Global	Maternal hemorrhage	Female	30 to 34	2021	1069.62228231941
Incidence	Global	Maternal hemorrhage	Female	30 to 34	2022	1036.04198653117
Incidence	Global	Maternal hemorrhage	Female	30 to 34	2023	1021.23134685881
Incidence	Global	Maternal hemorrhage	Female	30 to 34	2024	1006.42070718645
Incidence	Global	Maternal hemorrhage	Female	30 to 34	2025	986.894801290509
Incidence	Global	Maternal hemorrhage	Female	30 to 34	2026	967.368895394573
Incidence	Global	Maternal hemorrhage	Female	30 to 34	2027	947.842989498636
Incidence	Global	Maternal hemorrhage	Female	30 to 34	2028	928.317
Incidence	Global	Maternal hemorrhage	Female	30 to 34	2029	908.791177706763
Incidence	Global	Maternal hemorrhage	Female	30 to 34	2030	891.424912287073
Incidence	Global	Maternal hemorrhage	Female	30 to 34	2031	874.058646867382
Incidence	Global	Maternal hemorrhage	Female	30 to 34	2032	856.692381447691
Incidence	Global	Maternal hemorrhage	Female	30 to 34	2033	839.326
Incidence	Global	Maternal hemorrhage	Female	30 to 34	2034	821.95985060831
Incidence	Global	Maternal hemorrhage	Female	30 to 34	2035	820.87542853457
Incidence	Global	Maternal hemorrhage	Female	30 to 34	2036	819.79100646083
Incidence	Global	Maternal hemorrhage	Female	30 to 34	2037	818.70658438709
Incidence	Global	Maternal hemorrhage	Female	30 to 34	2038	817.62216231335
Incidence	Global	Maternal hemorrhage	Female	30 to 34	2039	816.53774023961
Incidence	Global	Maternal hemorrhage	Female	30 to 34	2040	815.459048498241
Incidence	Global	Maternal hemorrhage	Female	30 to 34	2041	814.380356756872
Incidence	Global	Maternal hemorrhage	Female	30 to 34	2042	813.301665015503
Incidence	Global	Maternal hemorrhage	Female	30 to 34	2043	812.222973274134
Incidence	Global	Maternal hemorrhage	Female	30 to 34	2044	811.144281532765
Incidence	Global	Maternal hemorrhage	Female	35 to 39	1992	663.608447109816
Incidence	Global	Maternal hemorrhage	Female	35 to 39	1993	655.108596229477
Incidence	Global	Maternal hemorrhage	Female	35 to 39	1994	651.963567670509
Incidence	Global	Maternal hemorrhage	Female	35 to 39	1995	652.306293424476
Incidence	Global	Maternal hemorrhage	Female	35 to 39	1996	650.843917788391
Incidence	Global	Maternal hemorrhage	Female	35 to 39	1997	643.511076351468
Incidence	Global	Maternal hemorrhage	Female	35 to 39	1998	630.485741687245
Incidence	Global	Maternal hemorrhage	Female	35 to 39	1999	616.313
Incidence	Global	Maternal hemorrhage	Female	35 to 39	2000	604.348045582391
Incidence	Global	Maternal hemorrhage	Female	35 to 39	2001	596.476560516364
Incidence	Global	Maternal hemorrhage	Female	35 to 39	2002	592.299647776661
Incidence	Global	Maternal hemorrhage	Female	35 to 39	2003	591.874804878413
Incidence	Global	Maternal hemorrhage	Female	35 to 39	2004	592.813449530976
Incidence	Global	Maternal hemorrhage	Female	35 to 39	2005	593.240624555796
Incidence	Global	Maternal hemorrhage	Female	35 to 39	2006	591.360894680165
Incidence	Global	Maternal hemorrhage	Female	35 to 39	2007	587.782696701016
Incidence	Global	Maternal hemorrhage	Female	35 to 39	2008	583.53205247432
Incidence	Global	Maternal hemorrhage	Female	35 to 39	2009	580.646196694337
Incidence	Global	Maternal hemorrhage	Female	35 to 39	2010	581.475464440967
Incidence	Global	Maternal hemorrhage	Female	35 to 39	2011	586.356
Incidence	Global	Maternal hemorrhage	Female	35 to 39	2012	592.902264415854
Incidence	Global	Maternal hemorrhage	Female	35 to 39	2013	599.295148423664
Incidence	Global	Maternal hemorrhage	Female	35 to 39	2014	603.809447995367
Incidence	Global	Maternal hemorrhage	Female	35 to 39	2015	605.319036796881
Incidence	Global	Maternal hemorrhage	Female	35 to 39	2016	604.388400102238
Incidence	Global	Maternal hemorrhage	Female	35 to 39	2017	601.621226718888
Incidence	Global	Maternal hemorrhage	Female	35 to 39	2018	597.057821732007
Incidence	Global	Maternal hemorrhage	Female	35 to 39	2019	591.048999772026
Incidence	Global	Maternal hemorrhage	Female	35 to 39	2020	583.794989580171
Incidence	Global	Maternal hemorrhage	Female	35 to 39	2021	574.725021718632
Incidence	Global	Maternal hemorrhage	Female	35 to 39	2022	579.590269477793
Incidence	Global	Maternal hemorrhage	Female	35 to 39	2023	576.325888582346
Incidence	Global	Maternal hemorrhage	Female	35 to 39	2024	573.062
Incidence	Global	Maternal hemorrhage	Female	35 to 39	2025	566.576321134867
Incidence	Global	Maternal hemorrhage	Female	35 to 39	2026	560.091134582835
Incidence	Global	Maternal hemorrhage	Female	35 to 39	2027	553.605948030802
Incidence	Global	Maternal hemorrhage	Female	35 to 39	2028	547.12076147877
Incidence	Global	Maternal hemorrhage	Female	35 to 39	2029	540.635574926737
Incidence	Global	Maternal hemorrhage	Female	35 to 39	2030	529.532772431321
Incidence	Global	Maternal hemorrhage	Female	35 to 39	2031	518.429969935904
Incidence	Global	Maternal hemorrhage	Female	35 to 39	2032	507.327167440487
Incidence	Global	Maternal hemorrhage	Female	35 to 39	2033	496.22436494507
Incidence	Global	Maternal hemorrhage	Female	35 to 39	2034	485.121562449654
Incidence	Global	Maternal hemorrhage	Female	35 to 39	2035	475.31989312001
Incidence	Global	Maternal hemorrhage	Female	35 to 39	2036	465.518223790367
Incidence	Global	Maternal hemorrhage	Female	35 to 39	2037	455.716554460724
Incidence	Global	Maternal hemorrhage	Female	35 to 39	2038	445.91488513108
Incidence	Global	Maternal hemorrhage	Female	35 to 39	2039	436.113215801437
Incidence	Global	Maternal hemorrhage	Female	35 to 39	2040	435.460322837137
Incidence	Global	Maternal hemorrhage	Female	35 to 39	2041	434.807429872838
Incidence	Global	Maternal hemorrhage	Female	35 to 39	2042	434.154536908538
Incidence	Global	Maternal hemorrhage	Female	35 to 39	2043	433.501643944238
Incidence	Global	Maternal hemorrhage	Female	35 to 39	2044	432.848750979938
Incidence	Global	Maternal hemorrhage	Female	40 to 44	1992	308.835372123122
Incidence	Global	Maternal hemorrhage	Female	40 to 44	1993	298.916882710054
Incidence	Global	Maternal hemorrhage	Female	40 to 44	1994	292.268535538046
Incidence	Global	Maternal hemorrhage	Female	40 to 44	1995	284.938207589166
Incidence	Global	Maternal hemorrhage	Female	40 to 44	1996	279.906082689892
Incidence	Global	Maternal hemorrhage	Female	40 to 44	1997	276.854198361818
Incidence	Global	Maternal hemorrhage	Female	40 to 44	1998	276.046427981119
Incidence	Global	Maternal hemorrhage	Female	40 to 44	1999	276.78821843568
Incidence	Global	Maternal hemorrhage	Female	40 to 44	2000	278.12456298757
Incidence	Global	Maternal hemorrhage	Female	40 to 44	2001	277.884374818979
Incidence	Global	Maternal hemorrhage	Female	40 to 44	2002	274.608156760769
Incidence	Global	Maternal hemorrhage	Female	40 to 44	2003	268.426735041812
Incidence	Global	Maternal hemorrhage	Female	40 to 44	2004	261.243616944707
Incidence	Global	Maternal hemorrhage	Female	40 to 44	2005	254.397604067704
Incidence	Global	Maternal hemorrhage	Female	40 to 44	2006	248.101418890595
Incidence	Global	Maternal hemorrhage	Female	40 to 44	2007	242.161553880704
Incidence	Global	Maternal hemorrhage	Female	40 to 44	2008	237.590595380667
Incidence	Global	Maternal hemorrhage	Female	40 to 44	2009	234.464626400422
Incidence	Global	Maternal hemorrhage	Female	40 to 44	2010	233.112781675194
Incidence	Global	Maternal hemorrhage	Female	40 to 44	2011	232.971851070427
Incidence	Global	Maternal hemorrhage	Female	40 to 44	2012	233.347846166114
Incidence	Global	Maternal hemorrhage	Female	40 to 44	2013	233.849947781769
Incidence	Global	Maternal hemorrhage	Female	40 to 44	2014	234.432212541793
Incidence	Global	Maternal hemorrhage	Female	40 to 44	2015	235.137728099856
Incidence	Global	Maternal hemorrhage	Female	40 to 44	2016	235.893002022145
Incidence	Global	Maternal hemorrhage	Female	40 to 44	2017	236.528592371317
Incidence	Global	Maternal hemorrhage	Female	40 to 44	2018	236.889475029844
Incidence	Global	Maternal hemorrhage	Female	40 to 44	2019	236.823767565962
Incidence	Global	Maternal hemorrhage	Female	40 to 44	2020	236.546335036454
Incidence	Global	Maternal hemorrhage	Female	40 to 44	2021	234.95543892825
Incidence	Global	Maternal hemorrhage	Female	40 to 44	2022	238.575826057751
Incidence	Global	Maternal hemorrhage	Female	40 to 44	2023	239.320434062485
Incidence	Global	Maternal hemorrhage	Female	40 to 44	2024	240.065042067218
Incidence	Global	Maternal hemorrhage	Female	40 to 44	2025	237.795749497051
Incidence	Global	Maternal hemorrhage	Female	40 to 44	2026	235.526456926885
Incidence	Global	Maternal hemorrhage	Female	40 to 44	2027	233.257164356718
Incidence	Global	Maternal hemorrhage	Female	40 to 44	2028	230.987871786551
Incidence	Global	Maternal hemorrhage	Female	40 to 44	2029	228.718579216385
Incidence	Global	Maternal hemorrhage	Female	40 to 44	2030	225.993507162853
Incidence	Global	Maternal hemorrhage	Female	40 to 44	2031	223.268435109322
Incidence	Global	Maternal hemorrhage	Female	40 to 44	2032	220.543363055791
Incidence	Global	Maternal hemorrhage	Female	40 to 44	2033	217.81829100226
Incidence	Global	Maternal hemorrhage	Female	40 to 44	2034	215.093218948729
Incidence	Global	Maternal hemorrhage	Female	40 to 44	2035	210.163999531825
Incidence	Global	Maternal hemorrhage	Female	40 to 44	2036	205.234780114921
Incidence	Global	Maternal hemorrhage	Female	40 to 44	2037	200.305560698017
Incidence	Global	Maternal hemorrhage	Female	40 to 44	2038	195.376341281112
Incidence	Global	Maternal hemorrhage	Female	40 to 44	2039	190.447121864208
Incidence	Global	Maternal hemorrhage	Female	40 to 44	2040	185.847987925554
Incidence	Global	Maternal hemorrhage	Female	40 to 44	2041	181.248853986901
Incidence	Global	Maternal hemorrhage	Female	40 to 44	2042	176.649720048247
Incidence	Global	Maternal hemorrhage	Female	40 to 44	2043	172.050586109593
Incidence	Global	Maternal hemorrhage	Female	40 to 44	2044	167.45145217094
Incidence	Global	Maternal hemorrhage	Female	45 to 49	1992	115.612639471895
Incidence	Global	Maternal hemorrhage	Female	45 to 49	1993	108.837414281385
Incidence	Global	Maternal hemorrhage	Female	45 to 49	1994	101.585504992884
Incidence	Global	Maternal hemorrhage	Female	45 to 49	1995	97.4217989655729
Incidence	Global	Maternal hemorrhage	Female	45 to 49	1996	94.5451011174498
Incidence	Global	Maternal hemorrhage	Female	45 to 49	1997	92.9137863756333
Incidence	Global	Maternal hemorrhage	Female	45 to 49	1998	91.1290379792051
Incidence	Global	Maternal hemorrhage	Female	45 to 49	1999	90.0709436768435
Incidence	Global	Maternal hemorrhage	Female	45 to 49	2000	87.8870215481149
Incidence	Global	Maternal hemorrhage	Female	45 to 49	2001	86.2011791344649
Incidence	Global	Maternal hemorrhage	Female	45 to 49	2002	85.032546857505
Incidence	Global	Maternal hemorrhage	Female	45 to 49	2003	84.3441019450694
Incidence	Global	Maternal hemorrhage	Female	45 to 49	2004	83.777
Incidence	Global	Maternal hemorrhage	Female	45 to 49	2005	82.9784815460888
Incidence	Global	Maternal hemorrhage	Female	45 to 49	2006	81.1461451029806
Incidence	Global	Maternal hemorrhage	Female	45 to 49	2007	78.0054366207378
Incidence	Global	Maternal hemorrhage	Female	45 to 49	2008	74.0302169243651
Incidence	Global	Maternal hemorrhage	Female	45 to 49	2009	70.1444008229198
Incidence	Global	Maternal hemorrhage	Female	45 to 49	2010	67.2003085984567
Incidence	Global	Maternal hemorrhage	Female	45 to 49	2011	65.2256042835806
Incidence	Global	Maternal hemorrhage	Female	45 to 49	2012	63.6000715313834
Incidence	Global	Maternal hemorrhage	Female	45 to 49	2013	62.4212248462613
Incidence	Global	Maternal hemorrhage	Female	45 to 49	2014	61.5434909142072
Incidence	Global	Maternal hemorrhage	Female	45 to 49	2015	60.8557701631905
Incidence	Global	Maternal hemorrhage	Female	45 to 49	2016	60.1778152218377
Incidence	Global	Maternal hemorrhage	Female	45 to 49	2017	59.5572645662653
Incidence	Global	Maternal hemorrhage	Female	45 to 49	2018	58.9648794967215
Incidence	Global	Maternal hemorrhage	Female	45 to 49	2019	58.4481481738663
Incidence	Global	Maternal hemorrhage	Female	45 to 49	2020	58.0253904907253
Incidence	Global	Maternal hemorrhage	Female	45 to 49	2021	57.5910090188084
Incidence	Global	Maternal hemorrhage	Female	45 to 49	2022	60.3188847063907
Incidence	Global	Maternal hemorrhage	Female	45 to 49	2023	60.9213458848666
Incidence	Global	Maternal hemorrhage	Female	45 to 49	2024	61.5238070633426
Incidence	Global	Maternal hemorrhage	Female	45 to 49	2025	61.7862658665595
Incidence	Global	Maternal hemorrhage	Female	45 to 49	2026	62.0487246697765
Incidence	Global	Maternal hemorrhage	Female	45 to 49	2027	62.3111834729935
Incidence	Global	Maternal hemorrhage	Female	45 to 49	2028	62.5736422762105
Incidence	Global	Maternal hemorrhage	Female	45 to 49	2029	62.8361010794274
Incidence	Global	Maternal hemorrhage	Female	45 to 49	2030	62.196818936066
Incidence	Global	Maternal hemorrhage	Female	45 to 49	2031	61.5575367927046
Incidence	Global	Maternal hemorrhage	Female	45 to 49	2032	60.9182546493431
Incidence	Global	Maternal hemorrhage	Female	45 to 49	2033	60.2789725059817
Incidence	Global	Maternal hemorrhage	Female	45 to 49	2034	59.6396903626202
Incidence	Global	Maternal hemorrhage	Female	45 to 49	2035	58.8424900989561
Incidence	Global	Maternal hemorrhage	Female	45 to 49	2036	58.0452898352919
Incidence	Global	Maternal hemorrhage	Female	45 to 49	2037	57.2480895716277
Incidence	Global	Maternal hemorrhage	Female	45 to 49	2038	56.4508893079636
Incidence	Global	Maternal hemorrhage	Female	45 to 49	2039	55.6536890442994
Incidence	Global	Maternal hemorrhage	Female	45 to 49	2040	54.0070812797529
Incidence	Global	Maternal hemorrhage	Female	45 to 49	2041	52.3604735152064
Incidence	Global	Maternal hemorrhage	Female	45 to 49	2042	50.7138657506599
Incidence	Global	Maternal hemorrhage	Female	45 to 49	2043	49.0672579861134
Incidence	Global	Maternal hemorrhage	Female	45 to 49	2044	47.4206502215668
Incidence	Global	Maternal hypertensive disorders	Female	15 to 19	1992	709.085168223239
Incidence	Global	Maternal hypertensive disorders	Female	15 to 19	1993	704.761624887757
Incidence	Global	Maternal hypertensive disorders	Female	15 to 19	1994	701.297925405923
Incidence	Global	Maternal hypertensive disorders	Female	15 to 19	1995	698.765116705042
Incidence	Global	Maternal hypertensive disorders	Female	15 to 19	1996	695.896683668994
Incidence	Global	Maternal hypertensive disorders	Female	15 to 19	1997	691.190176399035
Incidence	Global	Maternal hypertensive disorders	Female	15 to 19	1998	684.918482121836
Incidence	Global	Maternal hypertensive disorders	Female	15 to 19	1999	677.595708690779
Incidence	Global	Maternal hypertensive disorders	Female	15 to 19	2000	669.646244752391
Incidence	Global	Maternal hypertensive disorders	Female	15 to 19	2001	660.931145599252
Incidence	Global	Maternal hypertensive disorders	Female	15 to 19	2002	651.943863218692
Incidence	Global	Maternal hypertensive disorders	Female	15 to 19	2003	643.341734089868
Incidence	Global	Maternal hypertensive disorders	Female	15 to 19	2004	635.24134987768
Incidence	Global	Maternal hypertensive disorders	Female	15 to 19	2005	627.262462577314
Incidence	Global	Maternal hypertensive disorders	Female	15 to 19	2006	617.912986746669
Incidence	Global	Maternal hypertensive disorders	Female	15 to 19	2007	606.611529437584
Incidence	Global	Maternal hypertensive disorders	Female	15 to 19	2008	594.978620874117
Incidence	Global	Maternal hypertensive disorders	Female	15 to 19	2009	584.747856330892
Incidence	Global	Maternal hypertensive disorders	Female	15 to 19	2010	578.020774965782
Incidence	Global	Maternal hypertensive disorders	Female	15 to 19	2011	571.950782399938
Incidence	Global	Maternal hypertensive disorders	Female	15 to 19	2012	563.04546979619
Incidence	Global	Maternal hypertensive disorders	Female	15 to 19	2013	552.542218814925
Incidence	Global	Maternal hypertensive disorders	Female	15 to 19	2014	541.669610015837
Incidence	Global	Maternal hypertensive disorders	Female	15 to 19	2015	531.533167333576
Incidence	Global	Maternal hypertensive disorders	Female	15 to 19	2016	520.206770433173
Incidence	Global	Maternal hypertensive disorders	Female	15 to 19	2017	506.153988326773
Incidence	Global	Maternal hypertensive disorders	Female	15 to 19	2018	491.661765333015
Incidence	Global	Maternal hypertensive disorders	Female	15 to 19	2019	479.104905870153
Incidence	Global	Maternal hypertensive disorders	Female	15 to 19	2020	468.021649301897
Incidence	Global	Maternal hypertensive disorders	Female	15 to 19	2021	460.593182236271
Incidence	Global	Maternal hypertensive disorders	Female	15 to 19	2022	484.074650636239
Incidence	Global	Maternal hypertensive disorders	Female	15 to 19	2023	485.12040326173
Incidence	Global	Maternal hypertensive disorders	Female	15 to 19	2024	486.166155887221
Incidence	Global	Maternal hypertensive disorders	Female	15 to 19	2025	486.956423160532
Incidence	Global	Maternal hypertensive disorders	Female	15 to 19	2026	487.746690433842
Incidence	Global	Maternal hypertensive disorders	Female	15 to 19	2027	488.536957707152
Incidence	Global	Maternal hypertensive disorders	Female	15 to 19	2028	489.327224980463
Incidence	Global	Maternal hypertensive disorders	Female	15 to 19	2029	490.117492253773
Incidence	Global	Maternal hypertensive disorders	Female	15 to 19	2030	490.647185572247
Incidence	Global	Maternal hypertensive disorders	Female	15 to 19	2031	491.17687889072
Incidence	Global	Maternal hypertensive disorders	Female	15 to 19	2032	491.706572209193
Incidence	Global	Maternal hypertensive disorders	Female	15 to 19	2033	492.236265527667
Incidence	Global	Maternal hypertensive disorders	Female	15 to 19	2034	492.76595884614
Incidence	Global	Maternal hypertensive disorders	Female	15 to 19	2035	493.031662813898
Incidence	Global	Maternal hypertensive disorders	Female	15 to 19	2036	493.297366781656
Incidence	Global	Maternal hypertensive disorders	Female	15 to 19	2037	493.563070749414
Incidence	Global	Maternal hypertensive disorders	Female	15 to 19	2038	493.828774717171
Incidence	Global	Maternal hypertensive disorders	Female	15 to 19	2039	494.094478684929
Incidence	Global	Maternal hypertensive disorders	Female	15 to 19	2040	494.360755424085
Incidence	Global	Maternal hypertensive disorders	Female	15 to 19	2041	494.627032163241
Incidence	Global	Maternal hypertensive disorders	Female	15 to 19	2042	494.893308902397
Incidence	Global	Maternal hypertensive disorders	Female	15 to 19	2043	495.159585641553
Incidence	Global	Maternal hypertensive disorders	Female	15 to 19	2044	495.425862380709
Incidence	Global	Maternal hypertensive disorders	Female	20 to 24	1992	1697.19645226045
Incidence	Global	Maternal hypertensive disorders	Female	20 to 24	1993	1674.55552180568
Incidence	Global	Maternal hypertensive disorders	Female	20 to 24	1994	1659.21976939356
Incidence	Global	Maternal hypertensive disorders	Female	20 to 24	1995	1654.38709409983
Incidence	Global	Maternal hypertensive disorders	Female	20 to 24	1996	1670.17294430292
Incidence	Global	Maternal hypertensive disorders	Female	20 to 24	1997	1706.63356255814
Incidence	Global	Maternal hypertensive disorders	Female	20 to 24	1998	1751.7297930557
Incidence	Global	Maternal hypertensive disorders	Female	20 to 24	1999	1791.38492954336
Incidence	Global	Maternal hypertensive disorders	Female	20 to 24	2000	1811.47583972254
Incidence	Global	Maternal hypertensive disorders	Female	20 to 24	2001	1814.74078889572
Incidence	Global	Maternal hypertensive disorders	Female	20 to 24	2002	1812.0367945601
Incidence	Global	Maternal hypertensive disorders	Female	20 to 24	2003	1801.15337925273
Incidence	Global	Maternal hypertensive disorders	Female	20 to 24	2004	1780.19046546526
Incidence	Global	Maternal hypertensive disorders	Female	20 to 24	2005	1747.64239704171
Incidence	Global	Maternal hypertensive disorders	Female	20 to 24	2006	1691.10257968088
Incidence	Global	Maternal hypertensive disorders	Female	20 to 24	2007	1613.22910293363
Incidence	Global	Maternal hypertensive disorders	Female	20 to 24	2008	1533.22279338748
Incidence	Global	Maternal hypertensive disorders	Female	20 to 24	2009	1468.45514777315
Incidence	Global	Maternal hypertensive disorders	Female	20 to 24	2010	1435.0345601123
Incidence	Global	Maternal hypertensive disorders	Female	20 to 24	2011	1426.10176791462
Incidence	Global	Maternal hypertensive disorders	Female	20 to 24	2012	1422.3141147015
Incidence	Global	Maternal hypertensive disorders	Female	20 to 24	2013	1422.63138017396
Incidence	Global	Maternal hypertensive disorders	Female	20 to 24	2014	1425.57029147867
Incidence	Global	Maternal hypertensive disorders	Female	20 to 24	2015	1429.46625701444
Incidence	Global	Maternal hypertensive disorders	Female	20 to 24	2016	1426.54820480652
Incidence	Global	Maternal hypertensive disorders	Female	20 to 24	2017	1413.3297794796
Incidence	Global	Maternal hypertensive disorders	Female	20 to 24	2018	1395.40122159171
Incidence	Global	Maternal hypertensive disorders	Female	20 to 24	2019	1378.17788676968
Incidence	Global	Maternal hypertensive disorders	Female	20 to 24	2020	1350.37122849159
Incidence	Global	Maternal hypertensive disorders	Female	20 to 24	2021	1341.94659843406
Incidence	Global	Maternal hypertensive disorders	Female	20 to 24	2022	1307.6497626162
Incidence	Global	Maternal hypertensive disorders	Female	20 to 24	2023	1284.91903437347
Incidence	Global	Maternal hypertensive disorders	Female	20 to 24	2024	1262.18830613075
Incidence	Global	Maternal hypertensive disorders	Female	20 to 24	2025	1263.88264811666
Incidence	Global	Maternal hypertensive disorders	Female	20 to 24	2026	1265.57699010258
Incidence	Global	Maternal hypertensive disorders	Female	20 to 24	2027	1267.27133208849
Incidence	Global	Maternal hypertensive disorders	Female	20 to 24	2028	1268.9656740744
Incidence	Global	Maternal hypertensive disorders	Female	20 to 24	2029	1270.66001606031
Incidence	Global	Maternal hypertensive disorders	Female	20 to 24	2030	1271.7946227144
Incidence	Global	Maternal hypertensive disorders	Female	20 to 24	2031	1272.92922936849
Incidence	Global	Maternal hypertensive disorders	Female	20 to 24	2032	1274.06383602258
Incidence	Global	Maternal hypertensive disorders	Female	20 to 24	2033	1275.19844267667
Incidence	Global	Maternal hypertensive disorders	Female	20 to 24	2034	1276.33304933075
Incidence	Global	Maternal hypertensive disorders	Female	20 to 24	2035	1276.90187030783
Incidence	Global	Maternal hypertensive disorders	Female	20 to 24	2036	1277.4706912849
Incidence	Global	Maternal hypertensive disorders	Female	20 to 24	2037	1278.03951226198
Incidence	Global	Maternal hypertensive disorders	Female	20 to 24	2038	1278.60833323905
Incidence	Global	Maternal hypertensive disorders	Female	20 to 24	2039	1279.17715421613
Incidence	Global	Maternal hypertensive disorders	Female	20 to 24	2040	1279.74698876314
Incidence	Global	Maternal hypertensive disorders	Female	20 to 24	2041	1280.31682331014
Incidence	Global	Maternal hypertensive disorders	Female	20 to 24	2042	1280.88665785715
Incidence	Global	Maternal hypertensive disorders	Female	20 to 24	2043	1281.45649240416
Incidence	Global	Maternal hypertensive disorders	Female	20 to 24	2044	1282.02632695117
Incidence	Global	Maternal hypertensive disorders	Female	25 to 29	1992	1743.50391956423
Incidence	Global	Maternal hypertensive disorders	Female	25 to 29	1993	1712.03622278164
Incidence	Global	Maternal hypertensive disorders	Female	25 to 29	1994	1690.72792605302
Incidence	Global	Maternal hypertensive disorders	Female	25 to 29	1995	1679.6336668198
Incidence	Global	Maternal hypertensive disorders	Female	25 to 29	1996	1679.13658287579
Incidence	Global	Maternal hypertensive disorders	Female	25 to 29	1997	1686.78468217724
Incidence	Global	Maternal hypertensive disorders	Female	25 to 29	1998	1699.10834533123
Incidence	Global	Maternal hypertensive disorders	Female	25 to 29	1999	1714.03041064365
Incidence	Global	Maternal hypertensive disorders	Female	25 to 29	2000	1730.33351985802
Incidence	Global	Maternal hypertensive disorders	Female	25 to 29	2001	1746.89012884568
Incidence	Global	Maternal hypertensive disorders	Female	25 to 29	2002	1763.10712882729
Incidence	Global	Maternal hypertensive disorders	Female	25 to 29	2003	1776.91700516431
Incidence	Global	Maternal hypertensive disorders	Female	25 to 29	2004	1784.34160003592
Incidence	Global	Maternal hypertensive disorders	Female	25 to 29	2005	1783.11918567308
Incidence	Global	Maternal hypertensive disorders	Female	25 to 29	2006	1766.6252008764
Incidence	Global	Maternal hypertensive disorders	Female	25 to 29	2007	1734.09837686094
Incidence	Global	Maternal hypertensive disorders	Female	25 to 29	2008	1694.35041571305
Incidence	Global	Maternal hypertensive disorders	Female	25 to 29	2009	1658.37962300561
Incidence	Global	Maternal hypertensive disorders	Female	25 to 29	2010	1637.98122412653
Incidence	Global	Maternal hypertensive disorders	Female	25 to 29	2011	1627.85795030509
Incidence	Global	Maternal hypertensive disorders	Female	25 to 29	2012	1617.8124216546
Incidence	Global	Maternal hypertensive disorders	Female	25 to 29	2013	1610.04863733861
Incidence	Global	Maternal hypertensive disorders	Female	25 to 29	2014	1605.26147610166
Incidence	Global	Maternal hypertensive disorders	Female	25 to 29	2015	1602.87696841531
Incidence	Global	Maternal hypertensive disorders	Female	25 to 29	2016	1600.91398214033
Incidence	Global	Maternal hypertensive disorders	Female	25 to 29	2017	1597.71991083397
Incidence	Global	Maternal hypertensive disorders	Female	25 to 29	2018	1595.58022189579
Incidence	Global	Maternal hypertensive disorders	Female	25 to 29	2019	1597.04387248695
Incidence	Global	Maternal hypertensive disorders	Female	25 to 29	2020	1584.29860145918
Incidence	Global	Maternal hypertensive disorders	Female	25 to 29	2021	1605.07765945757
Incidence	Global	Maternal hypertensive disorders	Female	25 to 29	2022	1530.61246027314
Incidence	Global	Maternal hypertensive disorders	Female	25 to 29	2023	1508.8352071788
Incidence	Global	Maternal hypertensive disorders	Female	25 to 29	2024	1487.05795408445
Incidence	Global	Maternal hypertensive disorders	Female	25 to 29	2025	1461.04115468424
Incidence	Global	Maternal hypertensive disorders	Female	25 to 29	2026	1435.02435528403
Incidence	Global	Maternal hypertensive disorders	Female	25 to 29	2027	1409.00755588382
Incidence	Global	Maternal hypertensive disorders	Female	25 to 29	2028	1382.99075648362
Incidence	Global	Maternal hypertensive disorders	Female	25 to 29	2029	1356.97395708341
Incidence	Global	Maternal hypertensive disorders	Female	25 to 29	2030	1358.16978568193
Incidence	Global	Maternal hypertensive disorders	Female	25 to 29	2031	1359.36561428045
Incidence	Global	Maternal hypertensive disorders	Female	25 to 29	2032	1360.56144287897
Incidence	Global	Maternal hypertensive disorders	Female	25 to 29	2033	1361.75727147749
Incidence	Global	Maternal hypertensive disorders	Female	25 to 29	2034	1362.95310007601
Incidence	Global	Maternal hypertensive disorders	Female	25 to 29	2035	1363.5525930196
Incidence	Global	Maternal hypertensive disorders	Female	25 to 29	2036	1364.15208596319
Incidence	Global	Maternal hypertensive disorders	Female	25 to 29	2037	1364.75157890678
Incidence	Global	Maternal hypertensive disorders	Female	25 to 29	2038	1365.35107185037
Incidence	Global	Maternal hypertensive disorders	Female	25 to 29	2039	1365.95056479396
Incidence	Global	Maternal hypertensive disorders	Female	25 to 29	2040	1366.55111201833
Incidence	Global	Maternal hypertensive disorders	Female	25 to 29	2041	1367.15165924271
Incidence	Global	Maternal hypertensive disorders	Female	25 to 29	2042	1367.75220646708
Incidence	Global	Maternal hypertensive disorders	Female	25 to 29	2043	1368.35275369145
Incidence	Global	Maternal hypertensive disorders	Female	25 to 29	2044	1368.95330091583
Incidence	Global	Maternal hypertensive disorders	Female	30 to 34	1992	1469.14590463037
Incidence	Global	Maternal hypertensive disorders	Female	30 to 34	1993	1437.48960753254
Incidence	Global	Maternal hypertensive disorders	Female	30 to 34	1994	1404.36231965514
Incidence	Global	Maternal hypertensive disorders	Female	30 to 34	1995	1376.30914735977
Incidence	Global	Maternal hypertensive disorders	Female	30 to 34	1996	1353.93375617326
Incidence	Global	Maternal hypertensive disorders	Female	30 to 34	1997	1335.72319152037
Incidence	Global	Maternal hypertensive disorders	Female	30 to 34	1998	1325.04617362311
Incidence	Global	Maternal hypertensive disorders	Female	30 to 34	1999	1322.03035368071
Incidence	Global	Maternal hypertensive disorders	Female	30 to 34	2000	1327.36618579969
Incidence	Global	Maternal hypertensive disorders	Female	30 to 34	2001	1336.21613533411
Incidence	Global	Maternal hypertensive disorders	Female	30 to 34	2002	1342.8677499878
Incidence	Global	Maternal hypertensive disorders	Female	30 to 34	2003	1348.59457496825
Incidence	Global	Maternal hypertensive disorders	Female	30 to 34	2004	1355.20167539512
Incidence	Global	Maternal hypertensive disorders	Female	30 to 34	2005	1365.05028416624
Incidence	Global	Maternal hypertensive disorders	Female	30 to 34	2006	1377.67326298436
Incidence	Global	Maternal hypertensive disorders	Female	30 to 34	2007	1391.0096026354
Incidence	Global	Maternal hypertensive disorders	Female	30 to 34	2008	1404.14408254617
Incidence	Global	Maternal hypertensive disorders	Female	30 to 34	2009	1416.41782361451
Incidence	Global	Maternal hypertensive disorders	Female	30 to 34	2010	1429.86814790942
Incidence	Global	Maternal hypertensive disorders	Female	30 to 34	2011	1444.52649971125
Incidence	Global	Maternal hypertensive disorders	Female	30 to 34	2012	1456.50524532538
Incidence	Global	Maternal hypertensive disorders	Female	30 to 34	2013	1464.17889462933
Incidence	Global	Maternal hypertensive disorders	Female	30 to 34	2014	1466.69893871008
Incidence	Global	Maternal hypertensive disorders	Female	30 to 34	2015	1463.16011392884
Incidence	Global	Maternal hypertensive disorders	Female	30 to 34	2016	1452.71676958414
Incidence	Global	Maternal hypertensive disorders	Female	30 to 34	2017	1438.9469457049
Incidence	Global	Maternal hypertensive disorders	Female	30 to 34	2018	1426.90456711819
Incidence	Global	Maternal hypertensive disorders	Female	30 to 34	2019	1420.48199165527
Incidence	Global	Maternal hypertensive disorders	Female	30 to 34	2020	1413.66620967739
Incidence	Global	Maternal hypertensive disorders	Female	30 to 34	2021	1434.35605089737
Incidence	Global	Maternal hypertensive disorders	Female	30 to 34	2022	1381.72461822889
Incidence	Global	Maternal hypertensive disorders	Female	30 to 34	2023	1366.70438571567
Incidence	Global	Maternal hypertensive disorders	Female	30 to 34	2024	1351.68415320244
Incidence	Global	Maternal hypertensive disorders	Female	30 to 34	2025	1336.53369023869
Incidence	Global	Maternal hypertensive disorders	Female	30 to 34	2026	1321.38322727495
Incidence	Global	Maternal hypertensive disorders	Female	30 to 34	2027	1306.2327643112
Incidence	Global	Maternal hypertensive disorders	Female	30 to 34	2028	1291.08230134745
Incidence	Global	Maternal hypertensive disorders	Female	30 to 34	2029	1275.93183838371
Incidence	Global	Maternal hypertensive disorders	Female	30 to 34	2030	1252.41417719823
Incidence	Global	Maternal hypertensive disorders	Female	30 to 34	2031	1228.89651601276
Incidence	Global	Maternal hypertensive disorders	Female	30 to 34	2032	1205.37885482728
Incidence	Global	Maternal hypertensive disorders	Female	30 to 34	2033	1181.86119364181
Incidence	Global	Maternal hypertensive disorders	Female	30 to 34	2034	1158.34353245633
Incidence	Global	Maternal hypertensive disorders	Female	30 to 34	2035	1158.86989123543
Incidence	Global	Maternal hypertensive disorders	Female	30 to 34	2036	1159.39625001453
Incidence	Global	Maternal hypertensive disorders	Female	30 to 34	2037	1159.92260879363
Incidence	Global	Maternal hypertensive disorders	Female	30 to 34	2038	1160.44896757273
Incidence	Global	Maternal hypertensive disorders	Female	30 to 34	2039	1160.97532635183
Incidence	Global	Maternal hypertensive disorders	Female	30 to 34	2040	1161.50264141979
Incidence	Global	Maternal hypertensive disorders	Female	30 to 34	2041	1162.02995648776
Incidence	Global	Maternal hypertensive disorders	Female	30 to 34	2042	1162.55727155572
Incidence	Global	Maternal hypertensive disorders	Female	30 to 34	2043	1163.08458662368
Incidence	Global	Maternal hypertensive disorders	Female	30 to 34	2044	1163.61190169165
Incidence	Global	Maternal hypertensive disorders	Female	35 to 39	1992	950.744300789527
Incidence	Global	Maternal hypertensive disorders	Female	35 to 39	1993	944.83513169415
Incidence	Global	Maternal hypertensive disorders	Female	35 to 39	1994	944.978463998928
Incidence	Global	Maternal hypertensive disorders	Female	35 to 39	1995	948.439560998232
Incidence	Global	Maternal hypertensive disorders	Female	35 to 39	1996	947.348411629716
Incidence	Global	Maternal hypertensive disorders	Female	35 to 39	1997	935.259384596169
Incidence	Global	Maternal hypertensive disorders	Female	35 to 39	1998	912.664027938272
Incidence	Global	Maternal hypertensive disorders	Female	35 to 39	1999	887.535945266227
Incidence	Global	Maternal hypertensive disorders	Female	35 to 39	2000	866.617327744346
Incidence	Global	Maternal hypertensive disorders	Female	35 to 39	2001	852.306167475803
Incidence	Global	Maternal hypertensive disorders	Female	35 to 39	2002	843.722675847178
Incidence	Global	Maternal hypertensive disorders	Female	35 to 39	2003	841.824006864469
Incidence	Global	Maternal hypertensive disorders	Female	35 to 39	2004	844.354115265033
Incidence	Global	Maternal hypertensive disorders	Female	35 to 39	2005	849.60943340243
Incidence	Global	Maternal hypertensive disorders	Female	35 to 39	2006	856.052433981262
Incidence	Global	Maternal hypertensive disorders	Female	35 to 39	2007	863.303336582555
Incidence	Global	Maternal hypertensive disorders	Female	35 to 39	2008	871.271074565411
Incidence	Global	Maternal hypertensive disorders	Female	35 to 39	2009	880.693407414552
Incidence	Global	Maternal hypertensive disorders	Female	35 to 39	2010	892.770140769375
Incidence	Global	Maternal hypertensive disorders	Female	35 to 39	2011	907.331182203388
Incidence	Global	Maternal hypertensive disorders	Female	35 to 39	2012	922.194296023239
Incidence	Global	Maternal hypertensive disorders	Female	35 to 39	2013	935.643960547609
Incidence	Global	Maternal hypertensive disorders	Female	35 to 39	2014	945.877032078536
Incidence	Global	Maternal hypertensive disorders	Female	35 to 39	2015	952.413862641884
Incidence	Global	Maternal hypertensive disorders	Female	35 to 39	2016	954.321196484379
Incidence	Global	Maternal hypertensive disorders	Female	35 to 39	2017	951.15837620626
Incidence	Global	Maternal hypertensive disorders	Female	35 to 39	2018	944.472929428605
Incidence	Global	Maternal hypertensive disorders	Female	35 to 39	2019	936.665431040837
Incidence	Global	Maternal hypertensive disorders	Female	35 to 39	2020	927.332184362278
Incidence	Global	Maternal hypertensive disorders	Female	35 to 39	2021	925.670290006346
Incidence	Global	Maternal hypertensive disorders	Female	35 to 39	2022	920.391586387152
Incidence	Global	Maternal hypertensive disorders	Female	35 to 39	2023	914.924079391353
Incidence	Global	Maternal hypertensive disorders	Female	35 to 39	2024	909.456572395554
Incidence	Global	Maternal hypertensive disorders	Female	35 to 39	2025	903.779955839919
Incidence	Global	Maternal hypertensive disorders	Female	35 to 39	2026	898.103339284284
Incidence	Global	Maternal hypertensive disorders	Female	35 to 39	2027	892.426722728649
Incidence	Global	Maternal hypertensive disorders	Female	35 to 39	2028	886.750106173014
Incidence	Global	Maternal hypertensive disorders	Female	35 to 39	2029	881.073489617379
Incidence	Global	Maternal hypertensive disorders	Female	35 to 39	2030	869.936031411149
Incidence	Global	Maternal hypertensive disorders	Female	35 to 39	2031	858.798573204919
Incidence	Global	Maternal hypertensive disorders	Female	35 to 39	2032	847.661114998689
Incidence	Global	Maternal hypertensive disorders	Female	35 to 39	2033	836.523656792459
Incidence	Global	Maternal hypertensive disorders	Female	35 to 39	2034	825.386198586229
Incidence	Global	Maternal hypertensive disorders	Female	35 to 39	2035	808.477717660686
Incidence	Global	Maternal hypertensive disorders	Female	35 to 39	2036	791.569236735144
Incidence	Global	Maternal hypertensive disorders	Female	35 to 39	2037	774.660755809601
Incidence	Global	Maternal hypertensive disorders	Female	35 to 39	2038	757.752274884059
Incidence	Global	Maternal hypertensive disorders	Female	35 to 39	2039	740.843793958516
Incidence	Global	Maternal hypertensive disorders	Female	35 to 39	2040	741.211948497845
Incidence	Global	Maternal hypertensive disorders	Female	35 to 39	2041	741.580103037174
Incidence	Global	Maternal hypertensive disorders	Female	35 to 39	2042	741.948257576503
Incidence	Global	Maternal hypertensive disorders	Female	35 to 39	2043	742.316412115832
Incidence	Global	Maternal hypertensive disorders	Female	35 to 39	2044	742.684566655161
Incidence	Global	Maternal hypertensive disorders	Female	40 to 44	1992	441.93971137965
Incidence	Global	Maternal hypertensive disorders	Female	40 to 44	1993	430.101560089378
Incidence	Global	Maternal hypertensive disorders	Female	40 to 44	1994	422.357105034901
Incidence	Global	Maternal hypertensive disorders	Female	40 to 44	1995	413.293797735871
Incidence	Global	Maternal hypertensive disorders	Female	40 to 44	1996	405.773349516866
Incidence	Global	Maternal hypertensive disorders	Female	40 to 44	1997	399.758179337543
Incidence	Global	Maternal hypertensive disorders	Female	40 to 44	1998	396.216521354058
Incidence	Global	Maternal hypertensive disorders	Female	40 to 44	1999	394.687540091152
Incidence	Global	Maternal hypertensive disorders	Female	40 to 44	2000	394.465836060353
Incidence	Global	Maternal hypertensive disorders	Female	40 to 44	2001	392.826513663774
Incidence	Global	Maternal hypertensive disorders	Female	40 to 44	2002	387.685340423805
Incidence	Global	Maternal hypertensive disorders	Female	40 to 44	2003	379.232174495525
Incidence	Global	Maternal hypertensive disorders	Female	40 to 44	2004	370.23399130822
Incidence	Global	Maternal hypertensive disorders	Female	40 to 44	2005	362.747830129569
Incidence	Global	Maternal hypertensive disorders	Female	40 to 44	2006	357.560971114441
Incidence	Global	Maternal hypertensive disorders	Female	40 to 44	2007	354.324
Incidence	Global	Maternal hypertensive disorders	Female	40 to 44	2008	353.582168312771
Incidence	Global	Maternal hypertensive disorders	Female	40 to 44	2009	354.574554933353
Incidence	Global	Maternal hypertensive disorders	Female	40 to 44	2010	356.75997368304
Incidence	Global	Maternal hypertensive disorders	Female	40 to 44	2011	359.148573747117
Incidence	Global	Maternal hypertensive disorders	Female	40 to 44	2012	361.365211284071
Incidence	Global	Maternal hypertensive disorders	Female	40 to 44	2013	363.426055956685
Incidence	Global	Maternal hypertensive disorders	Female	40 to 44	2014	365.607454520207
Incidence	Global	Maternal hypertensive disorders	Female	40 to 44	2015	368.407520062129
Incidence	Global	Maternal hypertensive disorders	Female	40 to 44	2016	370.988715482503
Incidence	Global	Maternal hypertensive disorders	Female	40 to 44	2017	372.35231802514
Incidence	Global	Maternal hypertensive disorders	Female	40 to 44	2018	372.972011519846
Incidence	Global	Maternal hypertensive disorders	Female	40 to 44	2019	373.407928940822
Incidence	Global	Maternal hypertensive disorders	Female	40 to 44	2020	373.913278914712
Incidence	Global	Maternal hypertensive disorders	Female	40 to 44	2021	377.027095176423
Incidence	Global	Maternal hypertensive disorders	Female	40 to 44	2022	398.326511514888
Incidence	Global	Maternal hypertensive disorders	Female	40 to 44	2023	406.451401239872
Incidence	Global	Maternal hypertensive disorders	Female	40 to 44	2024	414.576290964856
Incidence	Global	Maternal hypertensive disorders	Female	40 to 44	2025	409.061195128763
Incidence	Global	Maternal hypertensive disorders	Female	40 to 44	2026	403.54609929267
Incidence	Global	Maternal hypertensive disorders	Female	40 to 44	2027	398.031003456577
Incidence	Global	Maternal hypertensive disorders	Female	40 to 44	2028	392.515907620483
Incidence	Global	Maternal hypertensive disorders	Female	40 to 44	2029	387.00081178439
Incidence	Global	Maternal hypertensive disorders	Female	40 to 44	2030	383.929797803845
Incidence	Global	Maternal hypertensive disorders	Female	40 to 44	2031	380.858783823299
Incidence	Global	Maternal hypertensive disorders	Female	40 to 44	2032	377.787769842754
Incidence	Global	Maternal hypertensive disorders	Female	40 to 44	2033	374.716755862209
Incidence	Global	Maternal hypertensive disorders	Female	40 to 44	2034	371.645741881663
Incidence	Global	Maternal hypertensive disorders	Female	40 to 44	2035	365.891009946134
Incidence	Global	Maternal hypertensive disorders	Female	40 to 44	2036	360.136278010606
Incidence	Global	Maternal hypertensive disorders	Female	40 to 44	2037	354.381546075077
Incidence	Global	Maternal hypertensive disorders	Female	40 to 44	2038	348.626814139548
Incidence	Global	Maternal hypertensive disorders	Female	40 to 44	2039	342.872082204019
Incidence	Global	Maternal hypertensive disorders	Female	40 to 44	2040	334.567487031067
Incidence	Global	Maternal hypertensive disorders	Female	40 to 44	2041	326.262891858114
Incidence	Global	Maternal hypertensive disorders	Female	40 to 44	2042	317.958296685162
Incidence	Global	Maternal hypertensive disorders	Female	40 to 44	2043	309.65370151221
Incidence	Global	Maternal hypertensive disorders	Female	40 to 44	2044	301.349106339257
Incidence	Global	Maternal hypertensive disorders	Female	45 to 49	1992	149.685515815179
Incidence	Global	Maternal hypertensive disorders	Female	45 to 49	1993	142.179347878502
Incidence	Global	Maternal hypertensive disorders	Female	45 to 49	1994	133.445892065129
Incidence	Global	Maternal hypertensive disorders	Female	45 to 49	1995	127.549261609344
Incidence	Global	Maternal hypertensive disorders	Female	45 to 49	1996	122.892175664664
Incidence	Global	Maternal hypertensive disorders	Female	45 to 49	1997	119.362062836954
Incidence	Global	Maternal hypertensive disorders	Female	45 to 49	1998	115.338779372842
Incidence	Global	Maternal hypertensive disorders	Female	45 to 49	1999	112.379784925436
Incidence	Global	Maternal hypertensive disorders	Female	45 to 49	2000	108.890686847962
Incidence	Global	Maternal hypertensive disorders	Female	45 to 49	2001	106.336788057701
Incidence	Global	Maternal hypertensive disorders	Female	45 to 49	2002	104.665319848557
Incidence	Global	Maternal hypertensive disorders	Female	45 to 49	2003	103.86589480503
Incidence	Global	Maternal hypertensive disorders	Female	45 to 49	2004	103.500259509098
Incidence	Global	Maternal hypertensive disorders	Female	45 to 49	2005	103.080821220795
Incidence	Global	Maternal hypertensive disorders	Female	45 to 49	2006	101.898912283857
Incidence	Global	Maternal hypertensive disorders	Female	45 to 49	2007	99.7012359120283
Incidence	Global	Maternal hypertensive disorders	Female	45 to 49	2008	96.6800756608577
Incidence	Global	Maternal hypertensive disorders	Female	45 to 49	2009	93.6048421879563
Incidence	Global	Maternal hypertensive disorders	Female	45 to 49	2010	91.1073773291323
Incidence	Global	Maternal hypertensive disorders	Female	45 to 49	2011	89.2418486307208
Incidence	Global	Maternal hypertensive disorders	Female	45 to 49	2012	87.6000830535029
Incidence	Global	Maternal hypertensive disorders	Female	45 to 49	2013	86.4002874593472
Incidence	Global	Maternal hypertensive disorders	Female	45 to 49	2014	85.5425671874127
Incidence	Global	Maternal hypertensive disorders	Female	45 to 49	2015	84.9760436243593
Incidence	Global	Maternal hypertensive disorders	Female	45 to 49	2016	84.1572437640693
Incidence	Global	Maternal hypertensive disorders	Female	45 to 49	2017	83.0111196712257
Incidence	Global	Maternal hypertensive disorders	Female	45 to 49	2018	81.8569024568174
Incidence	Global	Maternal hypertensive disorders	Female	45 to 49	2019	81.1269713878394
Incidence	Global	Maternal hypertensive disorders	Female	45 to 49	2020	80.7846403925776
Incidence	Global	Maternal hypertensive disorders	Female	45 to 49	2021	81.2530512751991
Incidence	Global	Maternal hypertensive disorders	Female	45 to 49	2022	94.879529179312
Incidence	Global	Maternal hypertensive disorders	Female	45 to 49	2023	99.3059709485525
Incidence	Global	Maternal hypertensive disorders	Female	45 to 49	2024	103.732412717793
Incidence	Global	Maternal hypertensive disorders	Female	45 to 49	2025	104.946927495159
Incidence	Global	Maternal hypertensive disorders	Female	45 to 49	2026	106.161442272525
Incidence	Global	Maternal hypertensive disorders	Female	45 to 49	2027	107.375957049892
Incidence	Global	Maternal hypertensive disorders	Female	45 to 49	2028	108.590471827258
Incidence	Global	Maternal hypertensive disorders	Female	45 to 49	2029	109.804986604624
Incidence	Global	Maternal hypertensive disorders	Female	45 to 49	2030	107.841256927994
Incidence	Global	Maternal hypertensive disorders	Female	45 to 49	2031	105.877527251364
Incidence	Global	Maternal hypertensive disorders	Female	45 to 49	2032	103.913797574734
Incidence	Global	Maternal hypertensive disorders	Female	45 to 49	2033	101.950067898104
Incidence	Global	Maternal hypertensive disorders	Female	45 to 49	2034	99.9863382214741
Incidence	Global	Maternal hypertensive disorders	Female	45 to 49	2035	98.8805623355254
Incidence	Global	Maternal hypertensive disorders	Female	45 to 49	2036	97.7747864495766
Incidence	Global	Maternal hypertensive disorders	Female	45 to 49	2037	96.6690105636278
Incidence	Global	Maternal hypertensive disorders	Female	45 to 49	2038	95.563234677679
Incidence	Global	Maternal hypertensive disorders	Female	45 to 49	2039	94.4574587917303
Incidence	Global	Maternal hypertensive disorders	Female	45 to 49	2040	92.5531602406373
Incidence	Global	Maternal hypertensive disorders	Female	45 to 49	2041	90.6488616895444
Incidence	Global	Maternal hypertensive disorders	Female	45 to 49	2042	88.7445631384514
Incidence	Global	Maternal hypertensive disorders	Female	45 to 49	2043	86.8402645873584
Incidence	Global	Maternal hypertensive disorders	Female	45 to 49	2044	84.9359660362655
Incidence	Global	Maternal obstructed labor and uterine rupture	Female	15 to 19	1992	760.709538947657
Incidence	Global	Maternal obstructed labor and uterine rupture	Female	15 to 19	1993	742.223801719829
Incidence	Global	Maternal obstructed labor and uterine rupture	Female	15 to 19	1994	726.695903889855
Incidence	Global	Maternal obstructed labor and uterine rupture	Female	15 to 19	1995	714.945649560644
Incidence	Global	Maternal obstructed labor and uterine rupture	Female	15 to 19	1996	704.404913627731
Incidence	Global	Maternal obstructed labor and uterine rupture	Female	15 to 19	1997	691.902495584291
Incidence	Global	Maternal obstructed labor and uterine rupture	Female	15 to 19	1998	678.017014195412
Incidence	Global	Maternal obstructed labor and uterine rupture	Female	15 to 19	1999	663.565323699445
Incidence	Global	Maternal obstructed labor and uterine rupture	Female	15 to 19	2000	649.519777170017
Incidence	Global	Maternal obstructed labor and uterine rupture	Female	15 to 19	2001	634.557000410382
Incidence	Global	Maternal obstructed labor and uterine rupture	Female	15 to 19	2002	618.415632006509
Incidence	Global	Maternal obstructed labor and uterine rupture	Female	15 to 19	2003	603.025173622433
Incidence	Global	Maternal obstructed labor and uterine rupture	Female	15 to 19	2004	589.625262287343
Incidence	Global	Maternal obstructed labor and uterine rupture	Female	15 to 19	2005	578.938569084101
Incidence	Global	Maternal obstructed labor and uterine rupture	Female	15 to 19	2006	570.238981876769
Incidence	Global	Maternal obstructed labor and uterine rupture	Female	15 to 19	2007	561.725854773771
Incidence	Global	Maternal obstructed labor and uterine rupture	Female	15 to 19	2008	553.200657428781
Incidence	Global	Maternal obstructed labor and uterine rupture	Female	15 to 19	2009	544.52775319505
Incidence	Global	Maternal obstructed labor and uterine rupture	Female	15 to 19	2010	535.665486559054
Incidence	Global	Maternal obstructed labor and uterine rupture	Female	15 to 19	2011	524.166954414654
Incidence	Global	Maternal obstructed labor and uterine rupture	Female	15 to 19	2012	508.907554034215
Incidence	Global	Maternal obstructed labor and uterine rupture	Female	15 to 19	2013	491.618384813062
Incidence	Global	Maternal obstructed labor and uterine rupture	Female	15 to 19	2014	474.066945316993
Incidence	Global	Maternal obstructed labor and uterine rupture	Female	15 to 19	2015	457.930998281693
Incidence	Global	Maternal obstructed labor and uterine rupture	Female	15 to 19	2016	441.709397358948
Incidence	Global	Maternal obstructed labor and uterine rupture	Female	15 to 19	2017	423.794067093557
Incidence	Global	Maternal obstructed labor and uterine rupture	Female	15 to 19	2018	406.035687994562
Incidence	Global	Maternal obstructed labor and uterine rupture	Female	15 to 19	2019	390.292032569044
Incidence	Global	Maternal obstructed labor and uterine rupture	Female	15 to 19	2020	376.217015354132
Incidence	Global	Maternal obstructed labor and uterine rupture	Female	15 to 19	2021	365.981554698295
Incidence	Global	Maternal obstructed labor and uterine rupture	Female	15 to 19	2022	391.389031660235
Incidence	Global	Maternal obstructed labor and uterine rupture	Female	15 to 19	2023	391.102606976724
Incidence	Global	Maternal obstructed labor and uterine rupture	Female	15 to 19	2024	390.816182293214
Incidence	Global	Maternal obstructed labor and uterine rupture	Female	15 to 19	2025	390.601913303615
Incidence	Global	Maternal obstructed labor and uterine rupture	Female	15 to 19	2026	390.387644314016
Incidence	Global	Maternal obstructed labor and uterine rupture	Female	15 to 19	2027	390.173375324417
Incidence	Global	Maternal obstructed labor and uterine rupture	Female	15 to 19	2028	389.959106334818
Incidence	Global	Maternal obstructed labor and uterine rupture	Female	15 to 19	2029	389.744837345219
Incidence	Global	Maternal obstructed labor and uterine rupture	Female	15 to 19	2030	389.602252599149
Incidence	Global	Maternal obstructed labor and uterine rupture	Female	15 to 19	2031	389.45966785308
Incidence	Global	Maternal obstructed labor and uterine rupture	Female	15 to 19	2032	389.317083107011
Incidence	Global	Maternal obstructed labor and uterine rupture	Female	15 to 19	2033	389.174498360941
Incidence	Global	Maternal obstructed labor and uterine rupture	Female	15 to 19	2034	389.031913614872
Incidence	Global	Maternal obstructed labor and uterine rupture	Female	15 to 19	2035	388.960699529888
Incidence	Global	Maternal obstructed labor and uterine rupture	Female	15 to 19	2036	388.889485444903
Incidence	Global	Maternal obstructed labor and uterine rupture	Female	15 to 19	2037	388.818271359918
Incidence	Global	Maternal obstructed labor and uterine rupture	Female	15 to 19	2038	388.747057274934
Incidence	Global	Maternal obstructed labor and uterine rupture	Female	15 to 19	2039	388.675843189949
Incidence	Global	Maternal obstructed labor and uterine rupture	Female	15 to 19	2040	388.604681258778
Incidence	Global	Maternal obstructed labor and uterine rupture	Female	15 to 19	2041	388.533519327608
Incidence	Global	Maternal obstructed labor and uterine rupture	Female	15 to 19	2042	388.462357396437
Incidence	Global	Maternal obstructed labor and uterine rupture	Female	15 to 19	2043	388.391195465266
Incidence	Global	Maternal obstructed labor and uterine rupture	Female	15 to 19	2044	388.320033534095
Incidence	Global	Maternal obstructed labor and uterine rupture	Female	20 to 24	1992	2210.81784916621
Incidence	Global	Maternal obstructed labor and uterine rupture	Female	20 to 24	1993	2150.51083191171
Incidence	Global	Maternal obstructed labor and uterine rupture	Female	20 to 24	1994	2098.55889780319
Incidence	Global	Maternal obstructed labor and uterine rupture	Female	20 to 24	1995	2056.95708724502
Incidence	Global	Maternal obstructed labor and uterine rupture	Female	20 to 24	1996	2020.31753836157
Incidence	Global	Maternal obstructed labor and uterine rupture	Female	20 to 24	1997	1983.48910706444
Incidence	Global	Maternal obstructed labor and uterine rupture	Female	20 to 24	1998	1948.57769626297
Incidence	Global	Maternal obstructed labor and uterine rupture	Female	20 to 24	1999	1916.94361494278
Incidence	Global	Maternal obstructed labor and uterine rupture	Female	20 to 24	2000	1890.00489409593
Incidence	Global	Maternal obstructed labor and uterine rupture	Female	20 to 24	2001	1863.53528579272
Incidence	Global	Maternal obstructed labor and uterine rupture	Female	20 to 24	2002	1833.07961382711
Incidence	Global	Maternal obstructed labor and uterine rupture	Female	20 to 24	2003	1800.32706032195
Incidence	Global	Maternal obstructed labor and uterine rupture	Female	20 to 24	2004	1766.86837813726
Incidence	Global	Maternal obstructed labor and uterine rupture	Female	20 to 24	2005	1734.21189128499
Incidence	Global	Maternal obstructed labor and uterine rupture	Female	20 to 24	2006	1694.92332968007
Incidence	Global	Maternal obstructed labor and uterine rupture	Female	20 to 24	2007	1645.50792264056
Incidence	Global	Maternal obstructed labor and uterine rupture	Female	20 to 24	2008	1593.44486783489
Incidence	Global	Maternal obstructed labor and uterine rupture	Female	20 to 24	2009	1548.01386123097
Incidence	Global	Maternal obstructed labor and uterine rupture	Female	20 to 24	2010	1519.00449143722
Incidence	Global	Maternal obstructed labor and uterine rupture	Female	20 to 24	2011	1501.92773734023
Incidence	Global	Maternal obstructed labor and uterine rupture	Female	20 to 24	2012	1484.92309228548
Incidence	Global	Maternal obstructed labor and uterine rupture	Female	20 to 24	2013	1467.67836788475
Incidence	Global	Maternal obstructed labor and uterine rupture	Female	20 to 24	2014	1449.40593398859
Incidence	Global	Maternal obstructed labor and uterine rupture	Female	20 to 24	2015	1429.29282335352
Incidence	Global	Maternal obstructed labor and uterine rupture	Female	20 to 24	2016	1401.18691816023
Incidence	Global	Maternal obstructed labor and uterine rupture	Female	20 to 24	2017	1363.71557938952
Incidence	Global	Maternal obstructed labor and uterine rupture	Female	20 to 24	2018	1322.73961649095
Incidence	Global	Maternal obstructed labor and uterine rupture	Female	20 to 24	2019	1284.03886508179
Incidence	Global	Maternal obstructed labor and uterine rupture	Female	20 to 24	2020	1246.53863547002
Incidence	Global	Maternal obstructed labor and uterine rupture	Female	20 to 24	2021	1213.20768997085
Incidence	Global	Maternal obstructed labor and uterine rupture	Female	20 to 24	2022	1203.55596842428
Incidence	Global	Maternal obstructed labor and uterine rupture	Female	20 to 24	2023	1176.06066585633
Incidence	Global	Maternal obstructed labor and uterine rupture	Female	20 to 24	2024	1148.56536328838
Incidence	Global	Maternal obstructed labor and uterine rupture	Female	20 to 24	2025	1148.0576736203
Incidence	Global	Maternal obstructed labor and uterine rupture	Female	20 to 24	2026	1147.54998395221
Incidence	Global	Maternal obstructed labor and uterine rupture	Female	20 to 24	2027	1147.04229428412
Incidence	Global	Maternal obstructed labor and uterine rupture	Female	20 to 24	2028	1146.53460461604
Incidence	Global	Maternal obstructed labor and uterine rupture	Female	20 to 24	2029	1146.02691494795
Incidence	Global	Maternal obstructed labor and uterine rupture	Female	20 to 24	2030	1145.68895415083
Incidence	Global	Maternal obstructed labor and uterine rupture	Female	20 to 24	2031	1145.35099335371
Incidence	Global	Maternal obstructed labor and uterine rupture	Female	20 to 24	2032	1145.01303255658
Incidence	Global	Maternal obstructed labor and uterine rupture	Female	20 to 24	2033	1144.67507175946
Incidence	Global	Maternal obstructed labor and uterine rupture	Female	20 to 24	2034	1144.33711096234
Incidence	Global	Maternal obstructed labor and uterine rupture	Female	20 to 24	2035	1144.16828012579
Incidence	Global	Maternal obstructed labor and uterine rupture	Female	20 to 24	2036	1143.99944928923
Incidence	Global	Maternal obstructed labor and uterine rupture	Female	20 to 24	2037	1143.83061845268
Incidence	Global	Maternal obstructed labor and uterine rupture	Female	20 to 24	2038	1143.66178761613
Incidence	Global	Maternal obstructed labor and uterine rupture	Female	20 to 24	2039	1143.49295677957
Incidence	Global	Maternal obstructed labor and uterine rupture	Female	20 to 24	2040	1143.32422559218
Incidence	Global	Maternal obstructed labor and uterine rupture	Female	20 to 24	2041	1143.15549440479
Incidence	Global	Maternal obstructed labor and uterine rupture	Female	20 to 24	2042	1142.98676321739
Incidence	Global	Maternal obstructed labor and uterine rupture	Female	20 to 24	2043	1142.82
Incidence	Global	Maternal obstructed labor and uterine rupture	Female	20 to 24	2044	1142.6493008426
Incidence	Global	Maternal obstructed labor and uterine rupture	Female	25 to 29	1992	1921.40842711437
Incidence	Global	Maternal obstructed labor and uterine rupture	Female	25 to 29	1993	1872.79567804877
Incidence	Global	Maternal obstructed labor and uterine rupture	Female	25 to 29	1994	1832.87814885187
Incidence	Global	Maternal obstructed labor and uterine rupture	Female	25 to 29	1995	1802.42661786089
Incidence	Global	Maternal obstructed labor and uterine rupture	Female	25 to 29	1996	1774.80862886373
Incidence	Global	Maternal obstructed labor and uterine rupture	Female	25 to 29	1997	1744.43551805967
Incidence	Global	Maternal obstructed labor and uterine rupture	Female	25 to 29	1998	1713.27095343588
Incidence	Global	Maternal obstructed labor and uterine rupture	Female	25 to 29	1999	1684.11776342498
Incidence	Global	Maternal obstructed labor and uterine rupture	Female	25 to 29	2000	1660.7235640718
Incidence	Global	Maternal obstructed labor and uterine rupture	Female	25 to 29	2001	1639.75493202799
Incidence	Global	Maternal obstructed labor and uterine rupture	Female	25 to 29	2002	1617.48680704031
Incidence	Global	Maternal obstructed labor and uterine rupture	Female	25 to 29	2003	1595.75667534777
Incidence	Global	Maternal obstructed labor and uterine rupture	Female	25 to 29	2004	1575.81279593202
Incidence	Global	Maternal obstructed labor and uterine rupture	Female	25 to 29	2005	1559.55954487235
Incidence	Global	Maternal obstructed labor and uterine rupture	Female	25 to 29	2006	1541.48403638901
Incidence	Global	Maternal obstructed labor and uterine rupture	Female	25 to 29	2007	1516.8796279562
Incidence	Global	Maternal obstructed labor and uterine rupture	Female	25 to 29	2008	1489.9197910966
Incidence	Global	Maternal obstructed labor and uterine rupture	Female	25 to 29	2009	1465.10177584571
Incidence	Global	Maternal obstructed labor and uterine rupture	Female	25 to 29	2010	1447.49048664154
Incidence	Global	Maternal obstructed labor and uterine rupture	Female	25 to 29	2011	1439.3227686846
Incidence	Global	Maternal obstructed labor and uterine rupture	Female	25 to 29	2012	1438.74481692157
Incidence	Global	Maternal obstructed labor and uterine rupture	Female	25 to 29	2013	1442.50459684946
Incidence	Global	Maternal obstructed labor and uterine rupture	Female	25 to 29	2014	1445.73450996368
Incidence	Global	Maternal obstructed labor and uterine rupture	Female	25 to 29	2015	1442.37641220015
Incidence	Global	Maternal obstructed labor and uterine rupture	Female	25 to 29	2016	1430.46203607328
Incidence	Global	Maternal obstructed labor and uterine rupture	Female	25 to 29	2017	1413.83845919342
Incidence	Global	Maternal obstructed labor and uterine rupture	Female	25 to 29	2018	1396.46045621505
Incidence	Global	Maternal obstructed labor and uterine rupture	Female	25 to 29	2019	1382.03467081549
Incidence	Global	Maternal obstructed labor and uterine rupture	Female	25 to 29	2020	1366.02295158223
Incidence	Global	Maternal obstructed labor and uterine rupture	Female	25 to 29	2021	1366.68884981411
Incidence	Global	Maternal obstructed labor and uterine rupture	Female	25 to 29	2022	1279.85620734485
Incidence	Global	Maternal obstructed labor and uterine rupture	Female	25 to 29	2023	1244.73554161405
Incidence	Global	Maternal obstructed labor and uterine rupture	Female	25 to 29	2024	1209.61487588325
Incidence	Global	Maternal obstructed labor and uterine rupture	Female	25 to 29	2025	1180.32575433263
Incidence	Global	Maternal obstructed labor and uterine rupture	Female	25 to 29	2026	1151.03663278202
Incidence	Global	Maternal obstructed labor and uterine rupture	Female	25 to 29	2027	1121.7475112314
Incidence	Global	Maternal obstructed labor and uterine rupture	Female	25 to 29	2028	1092.45838968078
Incidence	Global	Maternal obstructed labor and uterine rupture	Female	25 to 29	2029	1063.16926813016
Incidence	Global	Maternal obstructed labor and uterine rupture	Female	25 to 29	2030	1062.8510033894
Incidence	Global	Maternal obstructed labor and uterine rupture	Female	25 to 29	2031	1062.53273864863
Incidence	Global	Maternal obstructed labor and uterine rupture	Female	25 to 29	2032	1062.21447390787
Incidence	Global	Maternal obstructed labor and uterine rupture	Female	25 to 29	2033	1061.8962091671
Incidence	Global	Maternal obstructed labor and uterine rupture	Female	25 to 29	2034	1061.57794442634
Incidence	Global	Maternal obstructed labor and uterine rupture	Female	25 to 29	2035	1061.41895503125
Incidence	Global	Maternal obstructed labor and uterine rupture	Female	25 to 29	2036	1061.25996563616
Incidence	Global	Maternal obstructed labor and uterine rupture	Female	25 to 29	2037	1061.10097624107
Incidence	Global	Maternal obstructed labor and uterine rupture	Female	25 to 29	2038	1060.94198684598
Incidence	Global	Maternal obstructed labor and uterine rupture	Female	25 to 29	2039	1060.78299745089
Incidence	Global	Maternal obstructed labor and uterine rupture	Female	25 to 29	2040	1060.62410331556
Incidence	Global	Maternal obstructed labor and uterine rupture	Female	25 to 29	2041	1060.46520918023
Incidence	Global	Maternal obstructed labor and uterine rupture	Female	25 to 29	2042	1060.3063150449
Incidence	Global	Maternal obstructed labor and uterine rupture	Female	25 to 29	2043	1060.14742090957
Incidence	Global	Maternal obstructed labor and uterine rupture	Female	25 to 29	2044	1059.98852677424
Incidence	Global	Maternal obstructed labor and uterine rupture	Female	30 to 34	1992	1184.10551377795
Incidence	Global	Maternal obstructed labor and uterine rupture	Female	30 to 34	1993	1158.55992834109
Incidence	Global	Maternal obstructed labor and uterine rupture	Female	30 to 34	1994	1132.49768079148
Incidence	Global	Maternal obstructed labor and uterine rupture	Female	30 to 34	1995	1110.1680446017
Incidence	Global	Maternal obstructed labor and uterine rupture	Female	30 to 34	1996	1090.68902297631
Incidence	Global	Maternal obstructed labor and uterine rupture	Female	30 to 34	1997	1072.48170452679
Incidence	Global	Maternal obstructed labor and uterine rupture	Female	30 to 34	1998	1057.70376904578
Incidence	Global	Maternal obstructed labor and uterine rupture	Female	30 to 34	1999	1046.20063121399
Incidence	Global	Maternal obstructed labor and uterine rupture	Female	30 to 34	2000	1038.41458688772
Incidence	Global	Maternal obstructed labor and uterine rupture	Female	30 to 34	2001	1032.99453281157
Incidence	Global	Maternal obstructed labor and uterine rupture	Female	30 to 34	2002	1027.02081525819
Incidence	Global	Maternal obstructed labor and uterine rupture	Female	30 to 34	2003	1020.72821141647
Incidence	Global	Maternal obstructed labor and uterine rupture	Female	30 to 34	2004	1014.7897138709
Incidence	Global	Maternal obstructed labor and uterine rupture	Female	30 to 34	2005	1010.69895414072
Incidence	Global	Maternal obstructed labor and uterine rupture	Female	30 to 34	2006	1005.3846429478
Incidence	Global	Maternal obstructed labor and uterine rupture	Female	30 to 34	2007	997.578593587224
Incidence	Global	Maternal obstructed labor and uterine rupture	Female	30 to 34	2008	989.633462806016
Incidence	Global	Maternal obstructed labor and uterine rupture	Female	30 to 34	2009	983.864602621306
Incidence	Global	Maternal obstructed labor and uterine rupture	Female	30 to 34	2010	983.208476773074
Incidence	Global	Maternal obstructed labor and uterine rupture	Female	30 to 34	2011	989.125348145315
Incidence	Global	Maternal obstructed labor and uterine rupture	Female	30 to 34	2012	997.822790970505
Incidence	Global	Maternal obstructed labor and uterine rupture	Female	30 to 34	2013	1006.02865711069
Incidence	Global	Maternal obstructed labor and uterine rupture	Female	30 to 34	2014	1010.7716022711
Incidence	Global	Maternal obstructed labor and uterine rupture	Female	30 to 34	2015	1009.63177152364
Incidence	Global	Maternal obstructed labor and uterine rupture	Female	30 to 34	2016	1003.48729613316
Incidence	Global	Maternal obstructed labor and uterine rupture	Female	30 to 34	2017	996.201034126355
Incidence	Global	Maternal obstructed labor and uterine rupture	Female	30 to 34	2018	989.245747095744
Incidence	Global	Maternal obstructed labor and uterine rupture	Female	30 to 34	2019	983.824052304052
Incidence	Global	Maternal obstructed labor and uterine rupture	Female	30 to 34	2020	976.427936137304
Incidence	Global	Maternal obstructed labor and uterine rupture	Female	30 to 34	2021	988.958612472621
Incidence	Global	Maternal obstructed labor and uterine rupture	Female	30 to 34	2022	946.521466639412
Incidence	Global	Maternal obstructed labor and uterine rupture	Female	30 to 34	2023	933.077329642499
Incidence	Global	Maternal obstructed labor and uterine rupture	Female	30 to 34	2024	919.633192645586
Incidence	Global	Maternal obstructed labor and uterine rupture	Female	30 to 34	2025	896.800779265735
Incidence	Global	Maternal obstructed labor and uterine rupture	Female	30 to 34	2026	873.968365885885
Incidence	Global	Maternal obstructed labor and uterine rupture	Female	30 to 34	2027	851.135952506034
Incidence	Global	Maternal obstructed labor and uterine rupture	Female	30 to 34	2028	828.303539126184
Incidence	Global	Maternal obstructed labor and uterine rupture	Female	30 to 34	2029	805.471125746333
Incidence	Global	Maternal obstructed labor and uterine rupture	Female	30 to 34	2030	784.520507686001
Incidence	Global	Maternal obstructed labor and uterine rupture	Female	30 to 34	2031	763.56988962567
Incidence	Global	Maternal obstructed labor and uterine rupture	Female	30 to 34	2032	742.619271565338
Incidence	Global	Maternal obstructed labor and uterine rupture	Female	30 to 34	2033	721.668653505007
Incidence	Global	Maternal obstructed labor and uterine rupture	Female	30 to 34	2034	700.718035444675
Incidence	Global	Maternal obstructed labor and uterine rupture	Female	30 to 34	2035	700.604002586123
Incidence	Global	Maternal obstructed labor and uterine rupture	Female	30 to 34	2036	700.489969727572
Incidence	Global	Maternal obstructed labor and uterine rupture	Female	30 to 34	2037	700.37593686902
Incidence	Global	Maternal obstructed labor and uterine rupture	Female	30 to 34	2038	700.261904010468
Incidence	Global	Maternal obstructed labor and uterine rupture	Female	30 to 34	2039	700.147871151917
Incidence	Global	Maternal obstructed labor and uterine rupture	Female	30 to 34	2040	700.033912534979
Incidence	Global	Maternal obstructed labor and uterine rupture	Female	30 to 34	2041	699.919953918041
Incidence	Global	Maternal obstructed labor and uterine rupture	Female	30 to 34	2042	699.805995301104
Incidence	Global	Maternal obstructed labor and uterine rupture	Female	30 to 34	2043	699.692036684166
Incidence	Global	Maternal obstructed labor and uterine rupture	Female	30 to 34	2044	699.578078067229
Incidence	Global	Maternal obstructed labor and uterine rupture	Female	35 to 39	1992	571.749719816652
Incidence	Global	Maternal obstructed labor and uterine rupture	Female	35 to 39	1993	566.218796611437
Incidence	Global	Maternal obstructed labor and uterine rupture	Female	35 to 39	1994	564.81059614521
Incidence	Global	Maternal obstructed labor and uterine rupture	Female	35 to 39	1995	566.098229389547
Incidence	Global	Maternal obstructed labor and uterine rupture	Female	35 to 39	1996	564.11877697266
Incidence	Global	Maternal obstructed labor and uterine rupture	Female	35 to 39	1997	554.749563212616
Incidence	Global	Maternal obstructed labor and uterine rupture	Female	35 to 39	1998	539.365268519206
Incidence	Global	Maternal obstructed labor and uterine rupture	Female	35 to 39	1999	523.139804833075
Incidence	Global	Maternal obstructed labor and uterine rupture	Female	35 to 39	2000	509.685698877486
Incidence	Global	Maternal obstructed labor and uterine rupture	Female	35 to 39	2001	500.335617050506
Incidence	Global	Maternal obstructed labor and uterine rupture	Female	35 to 39	2002	494.31104765814
Incidence	Global	Maternal obstructed labor and uterine rupture	Female	35 to 39	2003	491.578593017344
Incidence	Global	Maternal obstructed labor and uterine rupture	Female	35 to 39	2004	490.520518541134
Incidence	Global	Maternal obstructed labor and uterine rupture	Female	35 to 39	2005	489.916139482181
Incidence	Global	Maternal obstructed labor and uterine rupture	Female	35 to 39	2006	487.900319446939
Incidence	Global	Maternal obstructed labor and uterine rupture	Female	35 to 39	2007	483.803906904002
Incidence	Global	Maternal obstructed labor and uterine rupture	Female	35 to 39	2008	479.015580638162
Incidence	Global	Maternal obstructed labor and uterine rupture	Female	35 to 39	2009	475.494319093247
Incidence	Global	Maternal obstructed labor and uterine rupture	Female	35 to 39	2010	475.406795731691
Incidence	Global	Maternal obstructed labor and uterine rupture	Female	35 to 39	2011	479.198023368761
Incidence	Global	Maternal obstructed labor and uterine rupture	Female	35 to 39	2012	485.154755123121
Incidence	Global	Maternal obstructed labor and uterine rupture	Female	35 to 39	2013	491.520476568444
Incidence	Global	Maternal obstructed labor and uterine rupture	Female	35 to 39	2014	496.761198775952
Incidence	Global	Maternal obstructed labor and uterine rupture	Female	35 to 39	2015	499.746752652678
Incidence	Global	Maternal obstructed labor and uterine rupture	Female	35 to 39	2016	501.160227868877
Incidence	Global	Maternal obstructed labor and uterine rupture	Female	35 to 39	2017	501.550101663258
Incidence	Global	Maternal obstructed labor and uterine rupture	Female	35 to 39	2018	500.301210103336
Incidence	Global	Maternal obstructed labor and uterine rupture	Female	35 to 39	2019	496.846819930005
Incidence	Global	Maternal obstructed labor and uterine rupture	Female	35 to 39	2020	490.191369532606
Incidence	Global	Maternal obstructed labor and uterine rupture	Female	35 to 39	2021	490.10792766468
Incidence	Global	Maternal obstructed labor and uterine rupture	Female	35 to 39	2022	485.731406594967
Incidence	Global	Maternal obstructed labor and uterine rupture	Female	35 to 39	2023	482.418682047957
Incidence	Global	Maternal obstructed labor and uterine rupture	Female	35 to 39	2024	479.105957500948
Incidence	Global	Maternal obstructed labor and uterine rupture	Female	35 to 39	2025	473.510200075807
Incidence	Global	Maternal obstructed labor and uterine rupture	Female	35 to 39	2026	467.914442650667
Incidence	Global	Maternal obstructed labor and uterine rupture	Female	35 to 39	2027	462.318685225526
Incidence	Global	Maternal obstructed labor and uterine rupture	Female	35 to 39	2028	456.722927800385
Incidence	Global	Maternal obstructed labor and uterine rupture	Female	35 to 39	2029	451.127170375245
Incidence	Global	Maternal obstructed labor and uterine rupture	Female	35 to 39	2030	438.385998990136
Incidence	Global	Maternal obstructed labor and uterine rupture	Female	35 to 39	2031	425.644827605026
Incidence	Global	Maternal obstructed labor and uterine rupture	Female	35 to 39	2032	412.903656219917
Incidence	Global	Maternal obstructed labor and uterine rupture	Female	35 to 39	2033	400.162484834808
Incidence	Global	Maternal obstructed labor and uterine rupture	Female	35 to 39	2034	387.421313449699
Incidence	Global	Maternal obstructed labor and uterine rupture	Female	35 to 39	2035	375.918805594059
Incidence	Global	Maternal obstructed labor and uterine rupture	Female	35 to 39	2036	364.416297738419
Incidence	Global	Maternal obstructed labor and uterine rupture	Female	35 to 39	2037	352.913789882779
Incidence	Global	Maternal obstructed labor and uterine rupture	Female	35 to 39	2038	341.411282027139
Incidence	Global	Maternal obstructed labor and uterine rupture	Female	35 to 39	2039	329.908774171499
Incidence	Global	Maternal obstructed labor and uterine rupture	Female	35 to 39	2040	329.846359386844
Incidence	Global	Maternal obstructed labor and uterine rupture	Female	35 to 39	2041	329.783944602189
Incidence	Global	Maternal obstructed labor and uterine rupture	Female	35 to 39	2042	329.721529817534
Incidence	Global	Maternal obstructed labor and uterine rupture	Female	35 to 39	2043	329.659115032879
Incidence	Global	Maternal obstructed labor and uterine rupture	Female	35 to 39	2044	329.596700248224
Incidence	Global	Maternal obstructed labor and uterine rupture	Female	40 to 44	1992	215.155412624759
Incidence	Global	Maternal obstructed labor and uterine rupture	Female	40 to 44	1993	207.71064265246
Incidence	Global	Maternal obstructed labor and uterine rupture	Female	40 to 44	1994	202.32515093752
Incidence	Global	Maternal obstructed labor and uterine rupture	Female	40 to 44	1995	197.143553363985
Incidence	Global	Maternal obstructed labor and uterine rupture	Female	40 to 44	1996	192.318561962994
Incidence	Global	Maternal obstructed labor and uterine rupture	Female	40 to 44	1997	188.216874343512
Incidence	Global	Maternal obstructed labor and uterine rupture	Female	40 to 44	1998	185.334995335996
Incidence	Global	Maternal obstructed labor and uterine rupture	Female	40 to 44	1999	183.465034429505
Incidence	Global	Maternal obstructed labor and uterine rupture	Female	40 to 44	2000	182.36867145162
Incidence	Global	Maternal obstructed labor and uterine rupture	Female	40 to 44	2001	180.827185729102
Incidence	Global	Maternal obstructed labor and uterine rupture	Female	40 to 44	2002	177.802115155345
Incidence	Global	Maternal obstructed labor and uterine rupture	Female	40 to 44	2003	173.361222109498
Incidence	Global	Maternal obstructed labor and uterine rupture	Female	40 to 44	2004	168.700101504406
Incidence	Global	Maternal obstructed labor and uterine rupture	Female	40 to 44	2005	164.531263241693
Incidence	Global	Maternal obstructed labor and uterine rupture	Female	40 to 44	2006	160.869135041899
Incidence	Global	Maternal obstructed labor and uterine rupture	Female	40 to 44	2007	157.599975735246
Incidence	Global	Maternal obstructed labor and uterine rupture	Female	40 to 44	2008	155.261543488988
Incidence	Global	Maternal obstructed labor and uterine rupture	Female	40 to 44	2009	153.845674159567
Incidence	Global	Maternal obstructed labor and uterine rupture	Female	40 to 44	2010	153.450600387812
Incidence	Global	Maternal obstructed labor and uterine rupture	Female	40 to 44	2011	154.023750930818
Incidence	Global	Maternal obstructed labor and uterine rupture	Female	40 to 44	2012	155.217080732781
Incidence	Global	Maternal obstructed labor and uterine rupture	Female	40 to 44	2013	156.600443193322
Incidence	Global	Maternal obstructed labor and uterine rupture	Female	40 to 44	2014	157.93825779371
Incidence	Global	Maternal obstructed labor and uterine rupture	Female	40 to 44	2015	159.066247039398
Incidence	Global	Maternal obstructed labor and uterine rupture	Female	40 to 44	2016	160.004037250285
Incidence	Global	Maternal obstructed labor and uterine rupture	Female	40 to 44	2017	160.834025053237
Incidence	Global	Maternal obstructed labor and uterine rupture	Female	40 to 44	2018	161.370575896584
Incidence	Global	Maternal obstructed labor and uterine rupture	Female	40 to 44	2019	161.471077468472
Incidence	Global	Maternal obstructed labor and uterine rupture	Female	40 to 44	2020	160.810921482937
Incidence	Global	Maternal obstructed labor and uterine rupture	Female	40 to 44	2021	161.67862804801
Incidence	Global	Maternal obstructed labor and uterine rupture	Female	40 to 44	2022	166.366322854107
Incidence	Global	Maternal obstructed labor and uterine rupture	Female	40 to 44	2023	168.076877977504
Incidence	Global	Maternal obstructed labor and uterine rupture	Female	40 to 44	2024	169.787433100901
Incidence	Global	Maternal obstructed labor and uterine rupture	Female	40 to 44	2025	167.867492874518
Incidence	Global	Maternal obstructed labor and uterine rupture	Female	40 to 44	2026	165.947552648135
Incidence	Global	Maternal obstructed labor and uterine rupture	Female	40 to 44	2027	164.027612421753
Incidence	Global	Maternal obstructed labor and uterine rupture	Female	40 to 44	2028	162.10767219537
Incidence	Global	Maternal obstructed labor and uterine rupture	Female	40 to 44	2029	160.187731968987
Incidence	Global	Maternal obstructed labor and uterine rupture	Female	40 to 44	2030	157.905091542198
Incidence	Global	Maternal obstructed labor and uterine rupture	Female	40 to 44	2031	155.622451115409
Incidence	Global	Maternal obstructed labor and uterine rupture	Female	40 to 44	2032	153.33981068862
Incidence	Global	Maternal obstructed labor and uterine rupture	Female	40 to 44	2033	151.057170261831
Incidence	Global	Maternal obstructed labor and uterine rupture	Female	40 to 44	2034	148.774529835042
Incidence	Global	Maternal obstructed labor and uterine rupture	Female	40 to 44	2035	143.634839403448
Incidence	Global	Maternal obstructed labor and uterine rupture	Female	40 to 44	2036	138.495148971854
Incidence	Global	Maternal obstructed labor and uterine rupture	Female	40 to 44	2037	133.35545854026
Incidence	Global	Maternal obstructed labor and uterine rupture	Female	40 to 44	2038	128.215768108666
Incidence	Global	Maternal obstructed labor and uterine rupture	Female	40 to 44	2039	123.076077677072
Incidence	Global	Maternal obstructed labor and uterine rupture	Female	40 to 44	2040	118.554314740112
Incidence	Global	Maternal obstructed labor and uterine rupture	Female	40 to 44	2041	114.032551803152
Incidence	Global	Maternal obstructed labor and uterine rupture	Female	40 to 44	2042	109.510788866192
Incidence	Global	Maternal obstructed labor and uterine rupture	Female	40 to 44	2043	104.989025929232
Incidence	Global	Maternal obstructed labor and uterine rupture	Female	40 to 44	2044	100.467262992273
Incidence	Global	Maternal obstructed labor and uterine rupture	Female	45 to 49	1992	67.2406424179651
Incidence	Global	Maternal obstructed labor and uterine rupture	Female	45 to 49	1993	63.2890701904388
Incidence	Global	Maternal obstructed labor and uterine rupture	Female	45 to 49	1994	59.0393707909695
Incidence	Global	Maternal obstructed labor and uterine rupture	Female	45 to 49	1995	55.8313726739364
Incidence	Global	Maternal obstructed labor and uterine rupture	Female	45 to 49	1996	53.5044894053912
Incidence	Global	Maternal obstructed labor and uterine rupture	Female	45 to 49	1997	51.5758358947017
Incidence	Global	Maternal obstructed labor and uterine rupture	Female	45 to 49	1998	49.4118895268215
Incidence	Global	Maternal obstructed labor and uterine rupture	Female	45 to 49	1999	47.6795755732998
Incidence	Global	Maternal obstructed labor and uterine rupture	Female	45 to 49	2000	46.0108411701756
Incidence	Global	Maternal obstructed labor and uterine rupture	Female	45 to 49	2001	44.6127358322149
Incidence	Global	Maternal obstructed labor and uterine rupture	Female	45 to 49	2002	43.7049670806974
Incidence	Global	Maternal obstructed labor and uterine rupture	Female	45 to 49	2003	43.1819638466539
Incidence	Global	Maternal obstructed labor and uterine rupture	Female	45 to 49	2004	42.7887260945186
Incidence	Global	Maternal obstructed labor and uterine rupture	Female	45 to 49	2005	42.2838492965429
Incidence	Global	Maternal obstructed labor and uterine rupture	Female	45 to 49	2006	41.3438941553246
Incidence	Global	Maternal obstructed labor and uterine rupture	Female	45 to 49	2007	39.9198813114058
Incidence	Global	Maternal obstructed labor and uterine rupture	Female	45 to 49	2008	38.1861336003444
Incidence	Global	Maternal obstructed labor and uterine rupture	Female	45 to 49	2009	36.5188197127807
Incidence	Global	Maternal obstructed labor and uterine rupture	Female	45 to 49	2010	35.2350846552893
Incidence	Global	Maternal obstructed labor and uterine rupture	Female	45 to 49	2011	34.4056508593436
Incidence	Global	Maternal obstructed labor and uterine rupture	Female	45 to 49	2012	33.8197581730464
Incidence	Global	Maternal obstructed labor and uterine rupture	Female	45 to 49	2013	33.4766671547215
Incidence	Global	Maternal obstructed labor and uterine rupture	Female	45 to 49	2014	33.2545457338284
Incidence	Global	Maternal obstructed labor and uterine rupture	Female	45 to 49	2015	33.0349725394951
Incidence	Global	Maternal obstructed labor and uterine rupture	Female	45 to 49	2016	32.7221448349345
Incidence	Global	Maternal obstructed labor and uterine rupture	Female	45 to 49	2017	32.3781449716272
Incidence	Global	Maternal obstructed labor and uterine rupture	Female	45 to 49	2018	31.9811646702006
Incidence	Global	Maternal obstructed labor and uterine rupture	Female	45 to 49	2019	31.5516432823438
Incidence	Global	Maternal obstructed labor and uterine rupture	Female	45 to 49	2020	30.9825330670769
Incidence	Global	Maternal obstructed labor and uterine rupture	Female	45 to 49	2021	30.5532405847519
Incidence	Global	Maternal obstructed labor and uterine rupture	Female	45 to 49	2022	34.8519979386579
Incidence	Global	Maternal obstructed labor and uterine rupture	Female	45 to 49	2023	35.9746902628459
Incidence	Global	Maternal obstructed labor and uterine rupture	Female	45 to 49	2024	37.0973825870338
Incidence	Global	Maternal obstructed labor and uterine rupture	Female	45 to 49	2025	37.4132579143933
Incidence	Global	Maternal obstructed labor and uterine rupture	Female	45 to 49	2026	37.7291332417527
Incidence	Global	Maternal obstructed labor and uterine rupture	Female	45 to 49	2027	38.0450085691122
Incidence	Global	Maternal obstructed labor and uterine rupture	Female	45 to 49	2028	38.3608838964717
Incidence	Global	Maternal obstructed labor and uterine rupture	Female	45 to 49	2029	38.6767592238311
Incidence	Global	Maternal obstructed labor and uterine rupture	Female	45 to 49	2030	38.1040594645495
Incidence	Global	Maternal obstructed labor and uterine rupture	Female	45 to 49	2031	37.5313597052679
Incidence	Global	Maternal obstructed labor and uterine rupture	Female	45 to 49	2032	36.9586599459863
Incidence	Global	Maternal obstructed labor and uterine rupture	Female	45 to 49	2033	36.3859601867047
Incidence	Global	Maternal obstructed labor and uterine rupture	Female	45 to 49	2034	35.8132604274231
Incidence	Global	Maternal obstructed labor and uterine rupture	Female	45 to 49	2035	35.1414404682431
Incidence	Global	Maternal obstructed labor and uterine rupture	Female	45 to 49	2036	34.4696205090631
Incidence	Global	Maternal obstructed labor and uterine rupture	Female	45 to 49	2037	33.797800549883
Incidence	Global	Maternal obstructed labor and uterine rupture	Female	45 to 49	2038	33.125980590703
Incidence	Global	Maternal obstructed labor and uterine rupture	Female	45 to 49	2039	32.454160631523
Incidence	Global	Maternal obstructed labor and uterine rupture	Female	45 to 49	2040	30.9735699750712
Incidence	Global	Maternal obstructed labor and uterine rupture	Female	45 to 49	2041	29.4929793186195
Incidence	Global	Maternal obstructed labor and uterine rupture	Female	45 to 49	2042	28.0123886621678
Incidence	Global	Maternal obstructed labor and uterine rupture	Female	45 to 49	2043	26.5317980057161
Incidence	Global	Maternal obstructed labor and uterine rupture	Female	45 to 49	2044	25.0512073492644
Incidence	Global	Ectopic pregnancy	Female	15 to 19	1992	279.868781056487
Incidence	Global	Ectopic pregnancy	Female	15 to 19	1993	276.079427739859
Incidence	Global	Ectopic pregnancy	Female	15 to 19	1994	272.594205902696
Incidence	Global	Ectopic pregnancy	Female	15 to 19	1995	269.517155393017
Incidence	Global	Ectopic pregnancy	Female	15 to 19	1996	266.353741183421
Incidence	Global	Ectopic pregnancy	Female	15 to 19	1997	262.567045417375
Incidence	Global	Ectopic pregnancy	Female	15 to 19	1998	258.347617839092
Incidence	Global	Ectopic pregnancy	Female	15 to 19	1999	253.977966811909
Incidence	Global	Ectopic pregnancy	Female	15 to 19	2000	249.802142239836
Incidence	Global	Ectopic pregnancy	Female	15 to 19	2001	245.249346900494
Incidence	Global	Ectopic pregnancy	Female	15 to 19	2002	240.205930974786
Incidence	Global	Ectopic pregnancy	Female	15 to 19	2003	235.427656602841
Incidence	Global	Ectopic pregnancy	Female	15 to 19	2004	231.457751764566
Incidence	Global	Ectopic pregnancy	Female	15 to 19	2005	228.682687261255
Incidence	Global	Ectopic pregnancy	Female	15 to 19	2006	227.107481905967
Incidence	Global	Ectopic pregnancy	Female	15 to 19	2007	226.092055547678
Incidence	Global	Ectopic pregnancy	Female	15 to 19	2008	225.291353105579
Incidence	Global	Ectopic pregnancy	Female	15 to 19	2009	224.362981153649
Incidence	Global	Ectopic pregnancy	Female	15 to 19	2010	223.000622403415
Incidence	Global	Ectopic pregnancy	Female	15 to 19	2011	220.211380344061
Incidence	Global	Ectopic pregnancy	Female	15 to 19	2012	215.719454507718
Incidence	Global	Ectopic pregnancy	Female	15 to 19	2013	210.237251922528
Incidence	Global	Ectopic pregnancy	Female	15 to 19	2014	204.477349212767
Incidence	Global	Ectopic pregnancy	Female	15 to 19	2015	199.129159670561
Incidence	Global	Ectopic pregnancy	Female	15 to 19	2016	194.009318974784
Incidence	Global	Ectopic pregnancy	Female	15 to 19	2017	188.471850638184
Incidence	Global	Ectopic pregnancy	Female	15 to 19	2018	182.676214967358
Incidence	Global	Ectopic pregnancy	Female	15 to 19	2019	176.769971968808
Incidence	Global	Ectopic pregnancy	Female	15 to 19	2020	169.835390015853
Incidence	Global	Ectopic pregnancy	Female	15 to 19	2021	166.120895665226
Incidence	Global	Ectopic pregnancy	Female	15 to 19	2022	173.890000787217
Incidence	Global	Ectopic pregnancy	Female	15 to 19	2023	172.957081103411
Incidence	Global	Ectopic pregnancy	Female	15 to 19	2024	172.024161419606
Incidence	Global	Ectopic pregnancy	Female	15 to 19	2025	171.337488184179
Incidence	Global	Ectopic pregnancy	Female	15 to 19	2026	170.650814948753
Incidence	Global	Ectopic pregnancy	Female	15 to 19	2027	169.964141713326
Incidence	Global	Ectopic pregnancy	Female	15 to 19	2028	169.277
Incidence	Global	Ectopic pregnancy	Female	15 to 19	2029	168.590795242473
Incidence	Global	Ectopic pregnancy	Female	15 to 19	2030	168.139136906968
Incidence	Global	Ectopic pregnancy	Female	15 to 19	2031	167.687478571462
Incidence	Global	Ectopic pregnancy	Female	15 to 19	2032	167.235820235956
Incidence	Global	Ectopic pregnancy	Female	15 to 19	2033	166.78416190045
Incidence	Global	Ectopic pregnancy	Female	15 to 19	2034	166.332503564944
Incidence	Global	Ectopic pregnancy	Female	15 to 19	2035	166.108496738597
Incidence	Global	Ectopic pregnancy	Female	15 to 19	2036	165.884489912249
Incidence	Global	Ectopic pregnancy	Female	15 to 19	2037	165.660483085902
Incidence	Global	Ectopic pregnancy	Female	15 to 19	2038	165.436476259554
Incidence	Global	Ectopic pregnancy	Female	15 to 19	2039	165.212469433207
Incidence	Global	Ectopic pregnancy	Female	15 to 19	2040	164.989670952124
Incidence	Global	Ectopic pregnancy	Female	15 to 19	2041	164.766872471042
Incidence	Global	Ectopic pregnancy	Female	15 to 19	2042	164.544073989959
Incidence	Global	Ectopic pregnancy	Female	15 to 19	2043	164.321275508877
Incidence	Global	Ectopic pregnancy	Female	15 to 19	2044	164.098477027794
Incidence	Global	Ectopic pregnancy	Female	20 to 24	1992	848.237417250552
Incidence	Global	Ectopic pregnancy	Female	20 to 24	1993	825.826849436589
Incidence	Global	Ectopic pregnancy	Female	20 to 24	1994	805.673149127304
Incidence	Global	Ectopic pregnancy	Female	20 to 24	1995	787.744536745679
Incidence	Global	Ectopic pregnancy	Female	20 to 24	1996	770.920457945562
Incidence	Global	Ectopic pregnancy	Female	20 to 24	1997	754.080440664508
Incidence	Global	Ectopic pregnancy	Female	20 to 24	1998	738.070371556621
Incidence	Global	Ectopic pregnancy	Female	20 to 24	1999	723.596240940822
Incidence	Global	Ectopic pregnancy	Female	20 to 24	2000	711.010467567668
Incidence	Global	Ectopic pregnancy	Female	20 to 24	2001	698.496611990834
Incidence	Global	Ectopic pregnancy	Female	20 to 24	2002	684.859926292202
Incidence	Global	Ectopic pregnancy	Female	20 to 24	2003	671.26978557706
Incidence	Global	Ectopic pregnancy	Female	20 to 24	2004	658.767571551152
Incidence	Global	Ectopic pregnancy	Female	20 to 24	2005	648.263458685346
Incidence	Global	Ectopic pregnancy	Female	20 to 24	2006	637.338209211363
Incidence	Global	Ectopic pregnancy	Female	20 to 24	2007	624.021242202769
Incidence	Global	Ectopic pregnancy	Female	20 to 24	2008	609.940183249161
Incidence	Global	Ectopic pregnancy	Female	20 to 24	2009	597.611311525105
Incidence	Global	Ectopic pregnancy	Female	20 to 24	2010	589.944214873052
Incidence	Global	Ectopic pregnancy	Female	20 to 24	2011	585.179877836207
Incidence	Global	Ectopic pregnancy	Female	20 to 24	2012	579.461439282187
Incidence	Global	Ectopic pregnancy	Female	20 to 24	2013	572.900870068185
Incidence	Global	Ectopic pregnancy	Female	20 to 24	2014	565.591887554184
Incidence	Global	Ectopic pregnancy	Female	20 to 24	2015	557.734589080491
Incidence	Global	Ectopic pregnancy	Female	20 to 24	2016	547.830948453916
Incidence	Global	Ectopic pregnancy	Female	20 to 24	2017	535.114233265174
Incidence	Global	Ectopic pregnancy	Female	20 to 24	2018	520.772524548025
Incidence	Global	Ectopic pregnancy	Female	20 to 24	2019	505.731230037569
Incidence	Global	Ectopic pregnancy	Female	20 to 24	2020	486.842774725189
Incidence	Global	Ectopic pregnancy	Female	20 to 24	2021	473.764499711241
Incidence	Global	Ectopic pregnancy	Female	20 to 24	2022	482.94769912024
Incidence	Global	Ectopic pregnancy	Female	20 to 24	2023	475.783130991979
Incidence	Global	Ectopic pregnancy	Female	20 to 24	2024	468.618562863717
Incidence	Global	Ectopic pregnancy	Female	20 to 24	2025	467.085468281987
Incidence	Global	Ectopic pregnancy	Female	20 to 24	2026	465.552373700258
Incidence	Global	Ectopic pregnancy	Female	20 to 24	2027	464.019279118528
Incidence	Global	Ectopic pregnancy	Female	20 to 24	2028	462.486184536798
Incidence	Global	Ectopic pregnancy	Female	20 to 24	2029	460.953089955069
Incidence	Global	Ectopic pregnancy	Female	20 to 24	2030	459.942221508348
Incidence	Global	Ectopic pregnancy	Female	20 to 24	2031	458.931353061627
Incidence	Global	Ectopic pregnancy	Female	20 to 24	2032	457.920484614907
Incidence	Global	Ectopic pregnancy	Female	20 to 24	2033	456.909616168186
Incidence	Global	Ectopic pregnancy	Female	20 to 24	2034	455.898747721465
Incidence	Global	Ectopic pregnancy	Female	20 to 24	2035	455.396649737012
Incidence	Global	Ectopic pregnancy	Female	20 to 24	2036	454.894551752559
Incidence	Global	Ectopic pregnancy	Female	20 to 24	2037	454.392453768105
Incidence	Global	Ectopic pregnancy	Female	20 to 24	2038	453.890355783652
Incidence	Global	Ectopic pregnancy	Female	20 to 24	2039	453.388257799198
Incidence	Global	Ectopic pregnancy	Female	20 to 24	2040	452.888374170423
Incidence	Global	Ectopic pregnancy	Female	20 to 24	2041	452.388490541647
Incidence	Global	Ectopic pregnancy	Female	20 to 24	2042	451.888606912871
Incidence	Global	Ectopic pregnancy	Female	20 to 24	2043	451.388723284095
Incidence	Global	Ectopic pregnancy	Female	20 to 24	2044	450.888839655319
Incidence	Global	Ectopic pregnancy	Female	25 to 29	1992	1023.74515245986
Incidence	Global	Ectopic pregnancy	Female	25 to 29	1993	998.895651459262
Incidence	Global	Ectopic pregnancy	Female	25 to 29	1994	976.588736391078
Incidence	Global	Ectopic pregnancy	Female	25 to 29	1995	958.499519589597
Incidence	Global	Ectopic pregnancy	Female	25 to 29	1996	942.477733814909
Incidence	Global	Ectopic pregnancy	Female	25 to 29	1997	927.527975368968
Incidence	Global	Ectopic pregnancy	Female	25 to 29	1998	913.598919650176
Incidence	Global	Ectopic pregnancy	Female	25 to 29	1999	900.801264546542
Incidence	Global	Ectopic pregnancy	Female	25 to 29	2000	889.469409292569
Incidence	Global	Ectopic pregnancy	Female	25 to 29	2001	877.816859170111
Incidence	Global	Ectopic pregnancy	Female	25 to 29	2002	864.260782212242
Incidence	Global	Ectopic pregnancy	Female	25 to 29	2003	850.180672615306
Incidence	Global	Ectopic pregnancy	Female	25 to 29	2004	836.861223240669
Incidence	Global	Ectopic pregnancy	Female	25 to 29	2005	825.552410266032
Incidence	Global	Ectopic pregnancy	Female	25 to 29	2006	814.265586002635
Incidence	Global	Ectopic pregnancy	Female	25 to 29	2007	801.495181243049
Incidence	Global	Ectopic pregnancy	Female	25 to 29	2008	789.105732685881
Incidence	Global	Ectopic pregnancy	Female	25 to 29	2009	778.968740117617
Incidence	Global	Ectopic pregnancy	Female	25 to 29	2010	773.111861699982
Incidence	Global	Ectopic pregnancy	Female	25 to 29	2011	774.465850331411
Incidence	Global	Ectopic pregnancy	Female	25 to 29	2012	782.660486023735
Incidence	Global	Ectopic pregnancy	Female	25 to 29	2013	793.543412644943
Incidence	Global	Ectopic pregnancy	Female	25 to 29	2014	802.055814435552
Incidence	Global	Ectopic pregnancy	Female	25 to 29	2015	802.681851172088
Incidence	Global	Ectopic pregnancy	Female	25 to 29	2016	794.708071327951
Incidence	Global	Ectopic pregnancy	Female	25 to 29	2017	782.01726429905
Incidence	Global	Ectopic pregnancy	Female	25 to 29	2018	766.932799129503
Incidence	Global	Ectopic pregnancy	Female	25 to 29	2019	751.610617382747
Incidence	Global	Ectopic pregnancy	Female	25 to 29	2020	730.052572016454
Incidence	Global	Ectopic pregnancy	Female	25 to 29	2021	721.730128602336
Incidence	Global	Ectopic pregnancy	Female	25 to 29	2022	700.669006398309
Incidence	Global	Ectopic pregnancy	Female	25 to 29	2023	683.982426202558
Incidence	Global	Ectopic pregnancy	Female	25 to 29	2024	667.295846006807
Incidence	Global	Ectopic pregnancy	Female	25 to 29	2025	656.87455320449
Incidence	Global	Ectopic pregnancy	Female	25 to 29	2026	646.453260402173
Incidence	Global	Ectopic pregnancy	Female	25 to 29	2027	636.031967599856
Incidence	Global	Ectopic pregnancy	Female	25 to 29	2028	625.61067479754
Incidence	Global	Ectopic pregnancy	Female	25 to 29	2029	615.189381995223
Incidence	Global	Ectopic pregnancy	Female	25 to 29	2030	613.915633635827
Incidence	Global	Ectopic pregnancy	Female	25 to 29	2031	612.641885276431
Incidence	Global	Ectopic pregnancy	Female	25 to 29	2032	611.368136917036
Incidence	Global	Ectopic pregnancy	Female	25 to 29	2033	610.09438855764
Incidence	Global	Ectopic pregnancy	Female	25 to 29	2034	608.820640198244
Incidence	Global	Ectopic pregnancy	Female	25 to 29	2035	608.187734302322
Incidence	Global	Ectopic pregnancy	Female	25 to 29	2036	607.554828406401
Incidence	Global	Ectopic pregnancy	Female	25 to 29	2037	606.921922510479
Incidence	Global	Ectopic pregnancy	Female	25 to 29	2038	606.289016614557
Incidence	Global	Ectopic pregnancy	Female	25 to 29	2039	605.656110718636
Incidence	Global	Ectopic pregnancy	Female	25 to 29	2040	605.025839338784
Incidence	Global	Ectopic pregnancy	Female	25 to 29	2041	604.395567958933
Incidence	Global	Ectopic pregnancy	Female	25 to 29	2042	603.765296579082
Incidence	Global	Ectopic pregnancy	Female	25 to 29	2043	603.135025199231
Incidence	Global	Ectopic pregnancy	Female	25 to 29	2044	602.50475381938
Incidence	Global	Ectopic pregnancy	Female	30 to 34	1992	793.846805809344
Incidence	Global	Ectopic pregnancy	Female	30 to 34	1993	774.225833429072
Incidence	Global	Ectopic pregnancy	Female	30 to 34	1994	758.597989490194
Incidence	Global	Ectopic pregnancy	Female	30 to 34	1995	749.331919062965
Incidence	Global	Ectopic pregnancy	Female	30 to 34	1996	745.795011454206
Incidence	Global	Ectopic pregnancy	Female	30 to 34	1997	744.357238988156
Incidence	Global	Ectopic pregnancy	Female	30 to 34	1998	744.412729003139
Incidence	Global	Ectopic pregnancy	Female	30 to 34	1999	744.492014670435
Incidence	Global	Ectopic pregnancy	Female	30 to 34	2000	743.689399219977
Incidence	Global	Ectopic pregnancy	Female	30 to 34	2001	741.553361808294
Incidence	Global	Ectopic pregnancy	Female	30 to 34	2002	739.460811838805
Incidence	Global	Ectopic pregnancy	Female	30 to 34	2003	737.439699221695
Incidence	Global	Ectopic pregnancy	Female	30 to 34	2004	735.66855209734
Incidence	Global	Ectopic pregnancy	Female	30 to 34	2005	734.705459838127
Incidence	Global	Ectopic pregnancy	Female	30 to 34	2006	733.529112074942
Incidence	Global	Ectopic pregnancy	Female	30 to 34	2007	731.036477442099
Incidence	Global	Ectopic pregnancy	Female	30 to 34	2008	728.292703443625
Incidence	Global	Ectopic pregnancy	Female	30 to 34	2009	726.459606886601
Incidence	Global	Ectopic pregnancy	Female	30 to 34	2010	726.664275456145
Incidence	Global	Ectopic pregnancy	Female	30 to 34	2011	732.545583295932
Incidence	Global	Ectopic pregnancy	Female	30 to 34	2012	743.865600313659
Incidence	Global	Ectopic pregnancy	Female	30 to 34	2013	756.802757647058
Incidence	Global	Ectopic pregnancy	Female	30 to 34	2014	768.007840464877
Incidence	Global	Ectopic pregnancy	Female	30 to 34	2015	773.757812099203
Incidence	Global	Ectopic pregnancy	Female	30 to 34	2016	774.87851919143
Incidence	Global	Ectopic pregnancy	Female	30 to 34	2017	774.763750640938
Incidence	Global	Ectopic pregnancy	Female	30 to 34	2018	772.528844019713
Incidence	Global	Ectopic pregnancy	Female	30 to 34	2019	767.65237585934
Incidence	Global	Ectopic pregnancy	Female	30 to 34	2020	753.515119763157
Incidence	Global	Ectopic pregnancy	Female	30 to 34	2021	746.389878475236
Incidence	Global	Ectopic pregnancy	Female	30 to 34	2022	719.902738152259
Incidence	Global	Ectopic pregnancy	Female	30 to 34	2023	705.59261399801
Incidence	Global	Ectopic pregnancy	Female	30 to 34	2024	691.282489843761
Incidence	Global	Ectopic pregnancy	Female	30 to 34	2025	677.228516417787
Incidence	Global	Ectopic pregnancy	Female	30 to 34	2026	663.174542991813
Incidence	Global	Ectopic pregnancy	Female	30 to 34	2027	649.120569565839
Incidence	Global	Ectopic pregnancy	Female	30 to 34	2028	635.066596139864
Incidence	Global	Ectopic pregnancy	Female	30 to 34	2029	621.01262271389
Incidence	Global	Ectopic pregnancy	Female	30 to 34	2030	611.782791783771
Incidence	Global	Ectopic pregnancy	Female	30 to 34	2031	602.552960853651
Incidence	Global	Ectopic pregnancy	Female	30 to 34	2032	593.323129923532
Incidence	Global	Ectopic pregnancy	Female	30 to 34	2033	584.093298993412
Incidence	Global	Ectopic pregnancy	Female	30 to 34	2034	574.863468063293
Incidence	Global	Ectopic pregnancy	Female	30 to 34	2035	574.258978272846
Incidence	Global	Ectopic pregnancy	Female	30 to 34	2036	573.654488482399
Incidence	Global	Ectopic pregnancy	Female	30 to 34	2037	573.049998691952
Incidence	Global	Ectopic pregnancy	Female	30 to 34	2038	572.445508901505
Incidence	Global	Ectopic pregnancy	Female	30 to 34	2039	571.841019111057
Incidence	Global	Ectopic pregnancy	Female	30 to 34	2040	571.239074570214
Incidence	Global	Ectopic pregnancy	Female	30 to 34	2041	570.637130029371
Incidence	Global	Ectopic pregnancy	Female	30 to 34	2042	570.035185488527
Incidence	Global	Ectopic pregnancy	Female	30 to 34	2043	569.433240947684
Incidence	Global	Ectopic pregnancy	Female	30 to 34	2044	568.83129640684
Incidence	Global	Ectopic pregnancy	Female	35 to 39	1992	527.151297663931
Incidence	Global	Ectopic pregnancy	Female	35 to 39	1993	509.56935968957
Incidence	Global	Ectopic pregnancy	Female	35 to 39	1994	499.165352540089
Incidence	Global	Ectopic pregnancy	Female	35 to 39	1995	495.855386771067
Incidence	Global	Ectopic pregnancy	Female	35 to 39	1996	494.120116902503
Incidence	Global	Ectopic pregnancy	Female	35 to 39	1997	489.098634024461
Incidence	Global	Ectopic pregnancy	Female	35 to 39	1998	481.407018436457
Incidence	Global	Ectopic pregnancy	Female	35 to 39	1999	473.730651302327
Incidence	Global	Ectopic pregnancy	Female	35 to 39	2000	467.934107830841
Incidence	Global	Ectopic pregnancy	Female	35 to 39	2001	464.977323761794
Incidence	Global	Ectopic pregnancy	Female	35 to 39	2002	464.231547931125
Incidence	Global	Ectopic pregnancy	Female	35 to 39	2003	465.611837181962
Incidence	Global	Ectopic pregnancy	Female	35 to 39	2004	468.015408393078
Incidence	Global	Ectopic pregnancy	Female	35 to 39	2005	470.839139718717
Incidence	Global	Ectopic pregnancy	Female	35 to 39	2006	473.325633131401
Incidence	Global	Ectopic pregnancy	Female	35 to 39	2007	476.069805214793
Incidence	Global	Ectopic pregnancy	Female	35 to 39	2008	479.108424309863
Incidence	Global	Ectopic pregnancy	Female	35 to 39	2009	482.787166658221
Incidence	Global	Ectopic pregnancy	Female	35 to 39	2010	487.582976902963
Incidence	Global	Ectopic pregnancy	Female	35 to 39	2011	495.250389319978
Incidence	Global	Ectopic pregnancy	Female	35 to 39	2012	504.685679298049
Incidence	Global	Ectopic pregnancy	Female	35 to 39	2013	513.074763795264
Incidence	Global	Ectopic pregnancy	Female	35 to 39	2014	518.275339760752
Incidence	Global	Ectopic pregnancy	Female	35 to 39	2015	518.533908274594
Incidence	Global	Ectopic pregnancy	Female	35 to 39	2016	515.624164169324
Incidence	Global	Ectopic pregnancy	Female	35 to 39	2017	512.30731272386
Incidence	Global	Ectopic pregnancy	Female	35 to 39	2018	508.512139885637
Incidence	Global	Ectopic pregnancy	Female	35 to 39	2019	504.100753313384
Incidence	Global	Ectopic pregnancy	Female	35 to 39	2020	495.082495199889
Incidence	Global	Ectopic pregnancy	Female	35 to 39	2021	488.623160141078
Incidence	Global	Ectopic pregnancy	Female	35 to 39	2022	494.261347128539
Incidence	Global	Ectopic pregnancy	Female	35 to 39	2023	491.853899767257
Incidence	Global	Ectopic pregnancy	Female	35 to 39	2024	489.446452405975
Incidence	Global	Ectopic pregnancy	Female	35 to 39	2025	482.663318633216
Incidence	Global	Ectopic pregnancy	Female	35 to 39	2026	475.880184860457
Incidence	Global	Ectopic pregnancy	Female	35 to 39	2027	469.097051087698
Incidence	Global	Ectopic pregnancy	Female	35 to 39	2028	462.313917314939
Incidence	Global	Ectopic pregnancy	Female	35 to 39	2029	455.53078354218
Incidence	Global	Ectopic pregnancy	Female	35 to 39	2030	445.960236957214
Incidence	Global	Ectopic pregnancy	Female	35 to 39	2031	436.389690372248
Incidence	Global	Ectopic pregnancy	Female	35 to 39	2032	426.819143787282
Incidence	Global	Ectopic pregnancy	Female	35 to 39	2033	417.248597202316
Incidence	Global	Ectopic pregnancy	Female	35 to 39	2034	407.67805061735
Incidence	Global	Ectopic pregnancy	Female	35 to 39	2035	401.535743709706
Incidence	Global	Ectopic pregnancy	Female	35 to 39	2036	395.393436802061
Incidence	Global	Ectopic pregnancy	Female	35 to 39	2037	389.251129894417
Incidence	Global	Ectopic pregnancy	Female	35 to 39	2038	383.108822986773
Incidence	Global	Ectopic pregnancy	Female	35 to 39	2039	376.966516079129
Incidence	Global	Ectopic pregnancy	Female	35 to 39	2040	376.535296149856
Incidence	Global	Ectopic pregnancy	Female	35 to 39	2041	376.104076220584
Incidence	Global	Ectopic pregnancy	Female	35 to 39	2042	375.672856291311
Incidence	Global	Ectopic pregnancy	Female	35 to 39	2043	375.241636362039
Incidence	Global	Ectopic pregnancy	Female	35 to 39	2044	374.810416432766
Incidence	Global	Ectopic pregnancy	Female	40 to 44	1992	290.205972902607
Incidence	Global	Ectopic pregnancy	Female	40 to 44	1993	278.647578109653
Incidence	Global	Ectopic pregnancy	Female	40 to 44	1994	270.208736608141
Incidence	Global	Ectopic pregnancy	Female	40 to 44	1995	263.112909692999
Incidence	Global	Ectopic pregnancy	Female	40 to 44	1996	257.393252321851
Incidence	Global	Ectopic pregnancy	Female	40 to 44	1997	252.520868243719
Incidence	Global	Ectopic pregnancy	Female	40 to 44	1998	248.975723529953
Incidence	Global	Ectopic pregnancy	Female	40 to 44	1999	246.58038366656
Incidence	Global	Ectopic pregnancy	Female	40 to 44	2000	244.968417489406
Incidence	Global	Ectopic pregnancy	Female	40 to 44	2001	242.929234370866
Incidence	Global	Ectopic pregnancy	Female	40 to 44	2002	239.560221836241
Incidence	Global	Ectopic pregnancy	Female	40 to 44	2003	235.045138779244
Incidence	Global	Ectopic pregnancy	Female	40 to 44	2004	230.730236626285
Incidence	Global	Ectopic pregnancy	Female	40 to 44	2005	227.439901865677
Incidence	Global	Ectopic pregnancy	Female	40 to 44	2006	225.57375286329
Incidence	Global	Ectopic pregnancy	Female	40 to 44	2007	224.815583603381
Incidence	Global	Ectopic pregnancy	Female	40 to 44	2008	225.325343068357
Incidence	Global	Ectopic pregnancy	Female	40 to 44	2009	226.733354288811
Incidence	Global	Ectopic pregnancy	Female	40 to 44	2010	228.920523297724
Incidence	Global	Ectopic pregnancy	Female	40 to 44	2011	231.887338879396
Incidence	Global	Ectopic pregnancy	Female	40 to 44	2012	235.754678267353
Incidence	Global	Ectopic pregnancy	Female	40 to 44	2013	239.657702831592
Incidence	Global	Ectopic pregnancy	Female	40 to 44	2014	242.908350839031
Incidence	Global	Ectopic pregnancy	Female	40 to 44	2015	244.876975944969
Incidence	Global	Ectopic pregnancy	Female	40 to 44	2016	245.627646335372
Incidence	Global	Ectopic pregnancy	Female	40 to 44	2017	245.445022510994
Incidence	Global	Ectopic pregnancy	Female	40 to 44	2018	244.347833185925
Incidence	Global	Ectopic pregnancy	Female	40 to 44	2019	242.390517205323
Incidence	Global	Ectopic pregnancy	Female	40 to 44	2020	238.560346128514
Incidence	Global	Ectopic pregnancy	Female	40 to 44	2021	236.70990756964
Incidence	Global	Ectopic pregnancy	Female	40 to 44	2022	243.487973917621
Incidence	Global	Ectopic pregnancy	Female	40 to 44	2023	244.16591535272
Incidence	Global	Ectopic pregnancy	Female	40 to 44	2024	244.843856787819
Incidence	Global	Ectopic pregnancy	Female	40 to 44	2025	243.225
Incidence	Global	Ectopic pregnancy	Female	40 to 44	2026	241.605158408981
Incidence	Global	Ectopic pregnancy	Female	40 to 44	2027	239.985809219562
Incidence	Global	Ectopic pregnancy	Female	40 to 44	2028	238.366460030143
Incidence	Global	Ectopic pregnancy	Female	40 to 44	2029	236.747110840725
Incidence	Global	Ectopic pregnancy	Female	40 to 44	2030	233.249468973225
Incidence	Global	Ectopic pregnancy	Female	40 to 44	2031	229.751827105725
Incidence	Global	Ectopic pregnancy	Female	40 to 44	2032	226.254185238225
Incidence	Global	Ectopic pregnancy	Female	40 to 44	2033	222.756543370725
Incidence	Global	Ectopic pregnancy	Female	40 to 44	2034	219.258901503225
Incidence	Global	Ectopic pregnancy	Female	40 to 44	2035	214.217074091255
Incidence	Global	Ectopic pregnancy	Female	40 to 44	2036	209.175246679284
Incidence	Global	Ectopic pregnancy	Female	40 to 44	2037	204.133419267314
Incidence	Global	Ectopic pregnancy	Female	40 to 44	2038	199.091591855344
Incidence	Global	Ectopic pregnancy	Female	40 to 44	2039	194.049764443373
Incidence	Global	Ectopic pregnancy	Female	40 to 44	2040	190.67496740104
Incidence	Global	Ectopic pregnancy	Female	40 to 44	2041	187.300170358707
Incidence	Global	Ectopic pregnancy	Female	40 to 44	2042	183.925373316374
Incidence	Global	Ectopic pregnancy	Female	40 to 44	2043	180.550576274041
Incidence	Global	Ectopic pregnancy	Female	40 to 44	2044	177.175779231708
Incidence	Global	Ectopic pregnancy	Female	45 to 49	1992	129.678405430048
Incidence	Global	Ectopic pregnancy	Female	45 to 49	1993	121.91279970676
Incidence	Global	Ectopic pregnancy	Female	45 to 49	1994	113.803863069962
Incidence	Global	Ectopic pregnancy	Female	45 to 49	1995	108.295271458689
Incidence	Global	Ectopic pregnancy	Female	45 to 49	1996	104.422818127399
Incidence	Global	Ectopic pregnancy	Female	45 to 49	1997	101.393983296499
Incidence	Global	Ectopic pregnancy	Female	45 to 49	1998	98.0477733410765
Incidence	Global	Ectopic pregnancy	Female	45 to 49	1999	95.3973634602336
Incidence	Global	Ectopic pregnancy	Female	45 to 49	2000	92.2611028386571
Incidence	Global	Ectopic pregnancy	Female	45 to 49	2001	89.8562426906734
Incidence	Global	Ectopic pregnancy	Female	45 to 49	2002	88.4520922257368
Incidence	Global	Ectopic pregnancy	Female	45 to 49	2003	87.7016568607783
Incidence	Global	Ectopic pregnancy	Female	45 to 49	2004	87.0764063352134
Incidence	Global	Ectopic pregnancy	Female	45 to 49	2005	86.1346835456575
Incidence	Global	Ectopic pregnancy	Female	45 to 49	2006	84.4316095927579
Incidence	Global	Ectopic pregnancy	Female	45 to 49	2007	82.0075087297665
Incidence	Global	Ectopic pregnancy	Female	45 to 49	2008	79.2098823516414
Incidence	Global	Ectopic pregnancy	Female	45 to 49	2009	76.597728883115
Incidence	Global	Ectopic pregnancy	Female	45 to 49	2010	74.6252505181611
Incidence	Global	Ectopic pregnancy	Female	45 to 49	2011	73.3680032497597
Incidence	Global	Ectopic pregnancy	Female	45 to 49	2012	72.4044373310135
Incidence	Global	Ectopic pregnancy	Female	45 to 49	2013	71.7260085239346
Incidence	Global	Ectopic pregnancy	Female	45 to 49	2014	71.1925651390804
Incidence	Global	Ectopic pregnancy	Female	45 to 49	2015	70.6854161820723
Incidence	Global	Ectopic pregnancy	Female	45 to 49	2016	70.1057037497772
Incidence	Global	Ectopic pregnancy	Female	45 to 49	2017	69.6240269629478
Incidence	Global	Ectopic pregnancy	Female	45 to 49	2018	69.1264429257599
Incidence	Global	Ectopic pregnancy	Female	45 to 49	2019	68.5358658008718
Incidence	Global	Ectopic pregnancy	Female	45 to 49	2020	67.4657422706133
Incidence	Global	Ectopic pregnancy	Female	45 to 49	2021	67.0674724732077
Incidence	Global	Ectopic pregnancy	Female	45 to 49	2022	73.5556965040709
Incidence	Global	Ectopic pregnancy	Female	45 to 49	2023	75.2889323342971
Incidence	Global	Ectopic pregnancy	Female	45 to 49	2024	77.0221681645233
Incidence	Global	Ectopic pregnancy	Female	45 to 49	2025	77.0477333548714
Incidence	Global	Ectopic pregnancy	Female	45 to 49	2026	77.0732985452194
Incidence	Global	Ectopic pregnancy	Female	45 to 49	2027	77.0988637355674
Incidence	Global	Ectopic pregnancy	Female	45 to 49	2028	77.1244289259155
Incidence	Global	Ectopic pregnancy	Female	45 to 49	2029	77.1499941162635
Incidence	Global	Ectopic pregnancy	Female	45 to 49	2030	76.6272030185146
Incidence	Global	Ectopic pregnancy	Female	45 to 49	2031	76.1044119207656
Incidence	Global	Ectopic pregnancy	Female	45 to 49	2032	75.5816208230167
Incidence	Global	Ectopic pregnancy	Female	45 to 49	2033	75.0588297252678
Incidence	Global	Ectopic pregnancy	Female	45 to 49	2034	74.5360386275188
Incidence	Global	Ectopic pregnancy	Female	45 to 49	2035	73.2691801959867
Incidence	Global	Ectopic pregnancy	Female	45 to 49	2036	72.0023217644546
Incidence	Global	Ectopic pregnancy	Female	45 to 49	2037	70.7354633329225
Incidence	Global	Ectopic pregnancy	Female	45 to 49	2038	69.4686049013904
Incidence	Global	Ectopic pregnancy	Female	45 to 49	2039	68.2017464698583
Incidence	Global	Ectopic pregnancy	Female	45 to 49	2040	66.2458480690454
Incidence	Global	Ectopic pregnancy	Female	45 to 49	2041	64.2899496682326
Incidence	Global	Ectopic pregnancy	Female	45 to 49	2042	62.3340512674197
Incidence	Global	Ectopic pregnancy	Female	45 to 49	2043	60.3781528666068
Incidence	Global	Ectopic pregnancy	Female	45 to 49	2044	58.4222544657939
Incidence	Global	Maternal abortion and miscarriage	Female	15 to 19	1992	3088.46694821218
Incidence	Global	Maternal abortion and miscarriage	Female	15 to 19	1993	3037.13562168201
Incidence	Global	Maternal abortion and miscarriage	Female	15 to 19	1994	2989.61506515914
Incidence	Global	Maternal abortion and miscarriage	Female	15 to 19	1995	2946.6852904328
Incidence	Global	Maternal abortion and miscarriage	Female	15 to 19	1996	2902.24395142074
Incidence	Global	Maternal abortion and miscarriage	Female	15 to 19	1997	2851.30411598297
Incidence	Global	Maternal abortion and miscarriage	Female	15 to 19	1998	2795.90315575815
Incidence	Global	Maternal abortion and miscarriage	Female	15 to 19	1999	2738.43926720619
Incidence	Global	Maternal abortion and miscarriage	Female	15 to 19	2000	2681.27763024446
Incidence	Global	Maternal abortion and miscarriage	Female	15 to 19	2001	2625.05991361814
Incidence	Global	Maternal abortion and miscarriage	Female	15 to 19	2002	2572.69228255221
Incidence	Global	Maternal abortion and miscarriage	Female	15 to 19	2003	2527.91795178643
Incidence	Global	Maternal abortion and miscarriage	Female	15 to 19	2004	2491.92415695693
Incidence	Global	Maternal abortion and miscarriage	Female	15 to 19	2005	2463.75575313324
Incidence	Global	Maternal abortion and miscarriage	Female	15 to 19	2006	2447.08152540184
Incidence	Global	Maternal abortion and miscarriage	Female	15 to 19	2007	2440.10532171473
Incidence	Global	Maternal abortion and miscarriage	Female	15 to 19	2008	2435.97108881326
Incidence	Global	Maternal abortion and miscarriage	Female	15 to 19	2009	2427.68819657851
Incidence	Global	Maternal abortion and miscarriage	Female	15 to 19	2010	2407.82972589576
Incidence	Global	Maternal abortion and miscarriage	Female	15 to 19	2011	2363.01891538297
Incidence	Global	Maternal abortion and miscarriage	Female	15 to 19	2012	2292.85181691959
Incidence	Global	Maternal abortion and miscarriage	Female	15 to 19	2013	2208.58282102377
Incidence	Global	Maternal abortion and miscarriage	Female	15 to 19	2014	2121.54615665396
Incidence	Global	Maternal abortion and miscarriage	Female	15 to 19	2015	2043.00644662738
Incidence	Global	Maternal abortion and miscarriage	Female	15 to 19	2016	1968.42665023456
Incidence	Global	Maternal abortion and miscarriage	Female	15 to 19	2017	1888.77729000443
Incidence	Global	Maternal abortion and miscarriage	Female	15 to 19	2018	1809.6273530866
Incidence	Global	Maternal abortion and miscarriage	Female	15 to 19	2019	1736.61584785445
Incidence	Global	Maternal abortion and miscarriage	Female	15 to 19	2020	1672.42939920655
Incidence	Global	Maternal abortion and miscarriage	Female	15 to 19	2021	1625.32575343977
Incidence	Global	Maternal abortion and miscarriage	Female	15 to 19	2022	1730.48831322418
Incidence	Global	Maternal abortion and miscarriage	Female	15 to 19	2023	1725.46135498697
Incidence	Global	Maternal abortion and miscarriage	Female	15 to 19	2024	1720.43439674975
Incidence	Global	Maternal abortion and miscarriage	Female	15 to 19	2025	1716.70231731361
Incidence	Global	Maternal abortion and miscarriage	Female	15 to 19	2026	1712.97023787747
Incidence	Global	Maternal abortion and miscarriage	Female	15 to 19	2027	1709.23815844133
Incidence	Global	Maternal abortion and miscarriage	Female	15 to 19	2028	1705.50607900518
Incidence	Global	Maternal abortion and miscarriage	Female	15 to 19	2029	1701.77399956904
Incidence	Global	Maternal abortion and miscarriage	Female	15 to 19	2030	1699.30398970617
Incidence	Global	Maternal abortion and miscarriage	Female	15 to 19	2031	1696.8339798433
Incidence	Global	Maternal abortion and miscarriage	Female	15 to 19	2032	1694.36396998044
Incidence	Global	Maternal abortion and miscarriage	Female	15 to 19	2033	1691.89396011757
Incidence	Global	Maternal abortion and miscarriage	Female	15 to 19	2034	1689.4239502547
Incidence	Global	Maternal abortion and miscarriage	Female	15 to 19	2035	1688.19433464783
Incidence	Global	Maternal abortion and miscarriage	Female	15 to 19	2036	1686.96471904095
Incidence	Global	Maternal abortion and miscarriage	Female	15 to 19	2037	1685.73510343408
Incidence	Global	Maternal abortion and miscarriage	Female	15 to 19	2038	1684.50548782721
Incidence	Global	Maternal abortion and miscarriage	Female	15 to 19	2039	1683.27587222034
Incidence	Global	Maternal abortion and miscarriage	Female	15 to 19	2040	1682.04983903265
Incidence	Global	Maternal abortion and miscarriage	Female	15 to 19	2041	1680.82380584496
Incidence	Global	Maternal abortion and miscarriage	Female	15 to 19	2042	1679.59777265727
Incidence	Global	Maternal abortion and miscarriage	Female	15 to 19	2043	1678.37173946958
Incidence	Global	Maternal abortion and miscarriage	Female	15 to 19	2044	1677.14570628189
Incidence	Global	Maternal abortion and miscarriage	Female	20 to 24	1992	7305.47379522644
Incidence	Global	Maternal abortion and miscarriage	Female	20 to 24	1993	7128.77319502992
Incidence	Global	Maternal abortion and miscarriage	Female	20 to 24	1994	6971.88321835253
Incidence	Global	Maternal abortion and miscarriage	Female	20 to 24	1995	6834.84109183086
Incidence	Global	Maternal abortion and miscarriage	Female	20 to 24	1996	6709.71961191882
Incidence	Global	Maternal abortion and miscarriage	Female	20 to 24	1997	6585.44364637634
Incidence	Global	Maternal abortion and miscarriage	Female	20 to 24	1998	6465.88089900773
Incidence	Global	Maternal abortion and miscarriage	Female	20 to 24	1999	6353.84975883376
Incidence	Global	Maternal abortion and miscarriage	Female	20 to 24	2000	6252.17819196112
Incidence	Global	Maternal abortion and miscarriage	Female	20 to 24	2001	6152.84572529069
Incidence	Global	Maternal abortion and miscarriage	Female	20 to 24	2002	6053.32261949138
Incidence	Global	Maternal abortion and miscarriage	Female	20 to 24	2003	5956.12437196071
Incidence	Global	Maternal abortion and miscarriage	Female	20 to 24	2004	5862.06541652865
Incidence	Global	Maternal abortion and miscarriage	Female	20 to 24	2005	5770.74896858663
Incidence	Global	Maternal abortion and miscarriage	Female	20 to 24	2006	5668.02627762872
Incidence	Global	Maternal abortion and miscarriage	Female	20 to 24	2007	5548.18074979241
Incidence	Global	Maternal abortion and miscarriage	Female	20 to 24	2008	5425.46578523284
Incidence	Global	Maternal abortion and miscarriage	Female	20 to 24	2009	5319.43039442104
Incidence	Global	Maternal abortion and miscarriage	Female	20 to 24	2010	5249.36295825573
Incidence	Global	Maternal abortion and miscarriage	Female	20 to 24	2011	5196.06154002975
Incidence	Global	Maternal abortion and miscarriage	Female	20 to 24	2012	5129.22407340964
Incidence	Global	Maternal abortion and miscarriage	Female	20 to 24	2013	5054.06762657873
Incidence	Global	Maternal abortion and miscarriage	Female	20 to 24	2014	4974.07324265843
Incidence	Global	Maternal abortion and miscarriage	Female	20 to 24	2015	4894.31542413202
Incidence	Global	Maternal abortion and miscarriage	Female	20 to 24	2016	4793.30053220173
Incidence	Global	Maternal abortion and miscarriage	Female	20 to 24	2017	4660.10337949887
Incidence	Global	Maternal abortion and miscarriage	Female	20 to 24	2018	4515.36002380055
Incidence	Global	Maternal abortion and miscarriage	Female	20 to 24	2019	4377.43016717436
Incidence	Global	Maternal abortion and miscarriage	Female	20 to 24	2020	4253.42061792923
Incidence	Global	Maternal abortion and miscarriage	Female	20 to 24	2021	4116.24806536619
Incidence	Global	Maternal abortion and miscarriage	Female	20 to 24	2022	4079.05629283584
Incidence	Global	Maternal abortion and miscarriage	Female	20 to 24	2023	3977.25
Incidence	Global	Maternal abortion and miscarriage	Female	20 to 24	2024	3875.43569832616
Incidence	Global	Maternal abortion and miscarriage	Female	20 to 24	2025	3868.28447217561
Incidence	Global	Maternal abortion and miscarriage	Female	20 to 24	2026	3861.13324602506
Incidence	Global	Maternal abortion and miscarriage	Female	20 to 24	2027	3853.98201987451
Incidence	Global	Maternal abortion and miscarriage	Female	20 to 24	2028	3846.83079372396
Incidence	Global	Maternal abortion and miscarriage	Female	20 to 24	2029	3839.67956757341
Incidence	Global	Maternal abortion and miscarriage	Female	20 to 24	2030	3834.94148021623
Incidence	Global	Maternal abortion and miscarriage	Female	20 to 24	2031	3830.20339285905
Incidence	Global	Maternal abortion and miscarriage	Female	20 to 24	2032	3825.46530550187
Incidence	Global	Maternal abortion and miscarriage	Female	20 to 24	2033	3820.72721814469
Incidence	Global	Maternal abortion and miscarriage	Female	20 to 24	2034	3815.98913078752
Incidence	Global	Maternal abortion and miscarriage	Female	20 to 24	2035	3813.62887344401
Incidence	Global	Maternal abortion and miscarriage	Female	20 to 24	2036	3811.2686161005
Incidence	Global	Maternal abortion and miscarriage	Female	20 to 24	2037	3808.90835875699
Incidence	Global	Maternal abortion and miscarriage	Female	20 to 24	2038	3806.54810141349
Incidence	Global	Maternal abortion and miscarriage	Female	20 to 24	2039	3804.18784406998
Incidence	Global	Maternal abortion and miscarriage	Female	20 to 24	2040	3801.8334297867
Incidence	Global	Maternal abortion and miscarriage	Female	20 to 24	2041	3799.47901550341
Incidence	Global	Maternal abortion and miscarriage	Female	20 to 24	2042	3797.12460122013
Incidence	Global	Maternal abortion and miscarriage	Female	20 to 24	2043	3794.77018693685
Incidence	Global	Maternal abortion and miscarriage	Female	20 to 24	2044	3792.41577265356
Incidence	Global	Maternal abortion and miscarriage	Female	25 to 29	1992	4697.92370110036
Incidence	Global	Maternal abortion and miscarriage	Female	25 to 29	1993	4588.4641972343
Incidence	Global	Maternal abortion and miscarriage	Female	25 to 29	1994	4497.87699410917
Incidence	Global	Maternal abortion and miscarriage	Female	25 to 29	1995	4427.85431534532
Incidence	Global	Maternal abortion and miscarriage	Female	25 to 29	1996	4381.8695620549
Incidence	Global	Maternal abortion and miscarriage	Female	25 to 29	1997	4339.84386032975
Incidence	Global	Maternal abortion and miscarriage	Female	25 to 29	1998	4304.19288203412
Incidence	Global	Maternal abortion and miscarriage	Female	25 to 29	1999	4269.28501088254
Incidence	Global	Maternal abortion and miscarriage	Female	25 to 29	2000	4231.31202432422
Incidence	Global	Maternal abortion and miscarriage	Female	25 to 29	2001	4181.18964739049
Incidence	Global	Maternal abortion and miscarriage	Female	25 to 29	2002	4117.07
Incidence	Global	Maternal abortion and miscarriage	Female	25 to 29	2003	4050.66344959118
Incidence	Global	Maternal abortion and miscarriage	Female	25 to 29	2004	3990.60960744062
Incidence	Global	Maternal abortion and miscarriage	Female	25 to 29	2005	3944.74912383548
Incidence	Global	Maternal abortion and miscarriage	Female	25 to 29	2006	3893.52716235377
Incidence	Global	Maternal abortion and miscarriage	Female	25 to 29	2007	3823.88334264601
Incidence	Global	Maternal abortion and miscarriage	Female	25 to 29	2008	3748.12047359038
Incidence	Global	Maternal abortion and miscarriage	Female	25 to 29	2009	3678.36191977238
Incidence	Global	Maternal abortion and miscarriage	Female	25 to 29	2010	3628.08059244662
Incidence	Global	Maternal abortion and miscarriage	Female	25 to 29	2011	3599.06879771027
Incidence	Global	Maternal abortion and miscarriage	Female	25 to 29	2012	3583.15565550015
Incidence	Global	Maternal abortion and miscarriage	Female	25 to 29	2013	3576.12420827928
Incidence	Global	Maternal abortion and miscarriage	Female	25 to 29	2014	3569.8070967021
Incidence	Global	Maternal abortion and miscarriage	Female	25 to 29	2015	3553.01311010591
Incidence	Global	Maternal abortion and miscarriage	Female	25 to 29	2016	3521.38896691319
Incidence	Global	Maternal abortion and miscarriage	Female	25 to 29	2017	3481.12979101114
Incidence	Global	Maternal abortion and miscarriage	Female	25 to 29	2018	3441.54353146676
Incidence	Global	Maternal abortion and miscarriage	Female	25 to 29	2019	3410.71238646607
Incidence	Global	Maternal abortion and miscarriage	Female	25 to 29	2020	3397.60503786044
Incidence	Global	Maternal abortion and miscarriage	Female	25 to 29	2021	3372.03511869295
Incidence	Global	Maternal abortion and miscarriage	Female	25 to 29	2022	3151.87308577094
Incidence	Global	Maternal abortion and miscarriage	Female	25 to 29	2023	3062.15158833488
Incidence	Global	Maternal abortion and miscarriage	Female	25 to 29	2024	2972.43009089882
Incidence	Global	Maternal abortion and miscarriage	Female	25 to 29	2025	2889.58146547703
Incidence	Global	Maternal abortion and miscarriage	Female	25 to 29	2026	2806.73284005525
Incidence	Global	Maternal abortion and miscarriage	Female	25 to 29	2027	2723.88421463346
Incidence	Global	Maternal abortion and miscarriage	Female	25 to 29	2028	2641.03558921168
Incidence	Global	Maternal abortion and miscarriage	Female	25 to 29	2029	2558.18696378989
[truncated: 227 more rows]
