# Supplementary material for: Maternal Disorders among Women Aged 15 to 49 Years Global Trends, Inequalities, and Projections from the GBD Study 2021
Source: Research Square preprint supplement (doi:10.21203/rs.3.rs-5848433/v1), 2025-04-04
Supplement: Supplementary file 2 [file 3c2ed1807edb794eb0b5835e.xlsx]

## Sheet: Table S3
location	cause	joinpoint	Segment	Segment.Start	Segment.End	Test.Statistic	P.Value	APC_95CI
Global	Ectopic pregnancy	5	0	1990	1993	-4.35721	0.001	-1.08 (-1.6 to -0.55)
Global	Ectopic pregnancy	5	1	1993	1997	-1.74595	0.101	-0.43 (-0.96 to 0.1)
Global	Ectopic pregnancy	5	2	1997	2001	6.73859	<0.001	1.69 (1.15 to 2.23)
Global	Ectopic pregnancy	5	3	2001	2009	-9.61253	<0.001	-0.64 (-0.78 to -0.5)
Global	Ectopic pregnancy	5	4	2009	2016	0.598261	0.559	0.05 (-0.13 to 0.23)
Global	Ectopic pregnancy	5	5	2016	2021	-4.84568	<0.001	-0.54 (-0.77 to -0.3)
Global	Maternal abortion and miscarriage	4	0	1990	1999	-39.1191	<0.001	-3.35 (-3.53 to -3.17)
Global	Maternal abortion and miscarriage	4	1	1999	2003	-12.7262	<0.001	-5.89 (-6.83 to -4.94)
Global	Maternal abortion and miscarriage	4	2	2003	2008	-14.8527	<0.001	-4.38 (-4.99 to -3.77)
Global	Maternal abortion and miscarriage	4	3	2008	2011	-5.88716	<0.001	-5.46 (-7.34 to -3.55)
Global	Maternal abortion and miscarriage	4	4	2011	2021	-62.3182	<0.001	-4.52 (-4.67 to -4.37)
Global	Maternal hemorrhage	3	0	1990	2000	-57.0725	<0.001	-2.47 (-2.55 to -2.38)
Global	Maternal hemorrhage	3	1	2000	2012	-122.555	<0.001	-4.54 (-4.61 to -4.46)
Global	Maternal hemorrhage	3	2	2012	2015	-10.2485	<0.001	-5.6 (-6.69 to -4.49)
Global	Maternal hemorrhage	3	3	2015	2021	-48.8278	<0.001	-4.53 (-4.72 to -4.34)
Global	Maternal hypertensive disorders	4	0	1990	1992	-5.36917	<0.001	-3.17 (-4.38 to -1.94)
Global	Maternal hypertensive disorders	4	1	1992	1999	-15.9593	<0.001	-1.61 (-1.82 to -1.4)
Global	Maternal hypertensive disorders	4	2	1999	2012	-73.7036	<0.001	-2.58 (-2.65 to -2.51)
Global	Maternal hypertensive disorders	4	3	2012	2017	-9.32335	<0.001	-1.75 (-2.14 to -1.36)
Global	Maternal hypertensive disorders	4	4	2017	2021	-14.7659	<0.001	-2.76 (-3.15 to -2.37)
Global	Maternal obstructed labor and uterine rupture	3	0	1990	2000	-26.0405	<0.001	-1.99 (-2.14 to -1.83)
Global	Maternal obstructed labor and uterine rupture	3	1	2000	2004	-10.0001	<0.001	-4.83 (-5.8 to -3.84)
Global	Maternal obstructed labor and uterine rupture	3	2	2004	2011	-22.6276	<0.001	-3.71 (-4.05 to -3.38)
Global	Maternal obstructed labor and uterine rupture	3	3	2011	2021	-32.524	<0.001	-2.47 (-2.63 to -2.32)
Global	Maternal sepsis and other maternal infections	5	0	1990	1995	-3.23944	0.006	-0.49 (-0.82 to -0.17)
Global	Maternal sepsis and other maternal infections	5	1	1995	2000	6.83928	<0.001	1.48 (1.02 to 1.95)
Global	Maternal sepsis and other maternal infections	5	2	2000	2006	-13.3257	<0.001	-2.01 (-2.33 to -1.69)
Global	Maternal sepsis and other maternal infections	5	3	2006	2015	-70.5601	<0.001	-5.11 (-5.26 to -4.96)
Global	Maternal sepsis and other maternal infections	5	4	2015	2019	-11.709	<0.001	-3.91 (-4.61 to -3.21)
Global	Maternal sepsis and other maternal infections	5	5	2019	2021	-3.6704	0.002	-2.47 (-3.88 to -1.04)
High SDI	Ectopic pregnancy	5	0	1990	1996	-29.0827	<0.001	-7.71 (-8.25 to -7.16)
High SDI	Ectopic pregnancy	5	1	1996	2002	-9.92574	<0.001	-3.56 (-4.3 to -2.8)
High SDI	Ectopic pregnancy	5	2	2002	2008	-5.65263	<0.001	-2.04 (-2.8 to -1.28)
High SDI	Ectopic pregnancy	5	3	2008	2011	-3.18568	0.006	-5.06 (-8.31 to -1.71)
High SDI	Ectopic pregnancy	5	4	2011	2017	-5.82028	<0.001	-2.1 (-2.86 to -1.34)
High SDI	Ectopic pregnancy	5	5	2017	2021	-6.73562	<0.001	-3.42 (-4.47 to -2.35)
High SDI	Maternal abortion and miscarriage	5	0	1990	1996	-40.2736	<0.001	-6.38 (-6.71 to -6.05)
High SDI	Maternal abortion and miscarriage	5	1	1996	2000	-8.18828	<0.001	-3.89 (-4.87 to -2.89)
High SDI	Maternal abortion and miscarriage	5	2	2000	2003	-6.17733	<0.001	-5.81 (-7.73 to -3.84)
High SDI	Maternal abortion and miscarriage	5	3	2003	2008	-9.3881	<0.001	-2.83 (-3.47 to -2.2)
High SDI	Maternal abortion and miscarriage	5	4	2008	2011	-4.72555	<0.001	-4.47 (-6.42 to -2.48)
High SDI	Maternal abortion and miscarriage	5	5	2011	2021	-38.3835	<0.001	-2.85 (-3.01 to -2.7)
High SDI	Maternal hemorrhage	4	0	1990	1996	-53.0046	<0.001	-7.19 (-7.46 to -6.91)
High SDI	Maternal hemorrhage	4	1	1996	2002	-24.9707	<0.001	-4.54 (-4.91 to -4.17)
High SDI	Maternal hemorrhage	4	2	2002	2008	-5.88027	<0.001	-1.09 (-1.47 to -0.7)
High SDI	Maternal hemorrhage	4	3	2008	2011	-6.31849	<0.001	-5.12 (-6.77 to -3.45)
High SDI	Maternal hemorrhage	4	4	2011	2021	-54.79	<0.001	-3.49 (-3.62 to -3.36)
High SDI	Maternal hypertensive disorders	5	0	1990	1996	-20.8354	<0.001	-3.92 (-4.32 to -3.53)
High SDI	Maternal hypertensive disorders	5	1	1996	2000	-1.41532	0.177	-0.8 (-2 to 0.41)
High SDI	Maternal hypertensive disorders	5	2	2000	2003	-2.49376	0.025	-2.79 (-5.12 to -0.41)
High SDI	Maternal hypertensive disorders	5	3	2003	2008	-3.25635	0.005	-1.16 (-1.92 to -0.4)
High SDI	Maternal hypertensive disorders	5	4	2008	2011	-2.43487	0.028	-2.73 (-5.06 to -0.34)
High SDI	Maternal hypertensive disorders	5	5	2011	2021	-4.79207	<0.001	-0.42 (-0.61 to -0.24)
High SDI	Maternal obstructed labor and uterine rupture	4	0	1990	1995	-32.9344	<0.001	-3.78 (-4.02 to -3.54)
High SDI	Maternal obstructed labor and uterine rupture	4	1	1995	2006	-43.1818	<0.001	-1.74 (-1.83 to -1.66)
High SDI	Maternal obstructed labor and uterine rupture	4	2	2006	2010	-14.5073	<0.001	-3.73 (-4.25 to -3.19)
High SDI	Maternal obstructed labor and uterine rupture	4	3	2010	2019	-9.12311	<0.001	-0.52 (-0.64 to -0.4)
High SDI	Maternal obstructed labor and uterine rupture	4	4	2019	2021	6.62288	<0.001	3.53 (2.39 to 4.67)
High SDI	Maternal sepsis and other maternal infections	4	0	1990	1995	-22.4142	<0.001	-5.88 (-6.41 to -5.34)
High SDI	Maternal sepsis and other maternal infections	4	1	1995	2001	-9.60249	<0.001	-2.56 (-3.11 to -2.01)
High SDI	Maternal sepsis and other maternal infections	4	2	2001	2005	-0.915539	0.372	-0.55 (-1.81 to 0.72)
High SDI	Maternal sepsis and other maternal infections	4	3	2005	2019	-34.0607	<0.001	-2.13 (-2.26 to -2)
High SDI	Maternal sepsis and other maternal infections	4	4	2019	2021	0.186394	0.854	0.23 (-2.29 to 2.8)
High-middle SDI	Ectopic pregnancy	4	0	1990	1997	-13.1765	<0.001	-4.56 (-5.26 to -3.84)
High-middle SDI	Ectopic pregnancy	4	1	1997	2001	-1.03891	0.313	-1.37 (-4.07 to 1.42)
High-middle SDI	Ectopic pregnancy	4	2	2001	2013	-31.7757	<0.001	-5.52 (-5.87 to -5.16)
High-middle SDI	Ectopic pregnancy	4	3	2013	2016	-0.443558	0.663	-1.17 (-6.52 to 4.49)
High-middle SDI	Ectopic pregnancy	4	4	2016	2021	-9.58548	<0.001	-5.52 (-6.69 to -4.34)
High-middle SDI	Maternal abortion and miscarriage	5	0	1990	2000	-43.5532	<0.001	-6.47 (-6.78 to -6.16)
High-middle SDI	Maternal abortion and miscarriage	5	1	2000	2005	-13.9379	<0.001	-8.33 (-9.54 to -7.1)
High-middle SDI	Maternal abortion and miscarriage	5	2	2005	2009	-4.5852	<0.001	-4.42 (-6.41 to -2.39)
High-middle SDI	Maternal abortion and miscarriage	5	3	2009	2012	-4.30249	0.001	-8.14 (-11.92 to -4.19)
High-middle SDI	Maternal abortion and miscarriage	5	4	2012	2015	-1.66537	0.117	-3.23 (-7.22 to 0.92)
High-middle SDI	Maternal abortion and miscarriage	5	5	2015	2021	-17.8153	<0.001	-5.77 (-6.44 to -5.1)
High-middle SDI	Maternal hemorrhage	5	0	1990	1992	-5.6678	<0.001	-7.98 (-10.82 to -5.06)
High-middle SDI	Maternal hemorrhage	5	1	1992	2000	-25.5121	<0.001	-4.88 (-5.28 to -4.48)
High-middle SDI	Maternal hemorrhage	5	2	2000	2006	-25.2381	<0.001	-7.95 (-8.59 to -7.3)
High-middle SDI	Maternal hemorrhage	5	3	2006	2012	-21.8941	<0.001	-6.93 (-7.58 to -6.28)
High-middle SDI	Maternal hemorrhage	5	4	2012	2016	-6.73697	<0.001	-4.82 (-6.3 to -3.32)
High-middle SDI	Maternal hemorrhage	5	5	2016	2021	-22.323	<0.001	-7.07 (-7.71 to -6.41)
High-middle SDI	Maternal hypertensive disorders	5	0	1990	1992	-4.89096	<0.001	-8 (-11.28 to -4.6)
High-middle SDI	Maternal hypertensive disorders	5	1	1992	1999	-15.55	<0.001	-4.38 (-4.97 to -3.79)
High-middle SDI	Maternal hypertensive disorders	5	2	1999	2005	-14.1028	<0.001	-5.23 (-6 to -4.46)
High-middle SDI	Maternal hypertensive disorders	5	3	2005	2013	-18.3975	<0.001	-4.1 (-4.57 to -3.64)
High-middle SDI	Maternal hypertensive disorders	5	4	2013	2016	-1.57299	0.137	-2.65 (-6.12 to 0.96)
High-middle SDI	Maternal hypertensive disorders	5	5	2016	2021	-13.6817	<0.001	-5.08 (-5.85 to -4.31)
High-middle SDI	Maternal obstructed labor and uterine rupture	5	0	1990	1993	-9.58447	<0.001	-4.82 (-5.86 to -3.77)
High-middle SDI	Maternal obstructed labor and uterine rupture	5	1	1993	2000	-12.143	<0.001	-2.09 (-2.46 to -1.73)
High-middle SDI	Maternal obstructed labor and uterine rupture	5	2	2000	2006	-25.7203	<0.001	-5.76 (-6.22 to -5.29)
High-middle SDI	Maternal obstructed labor and uterine rupture	5	3	2006	2012	-17.3881	<0.001	-3.93 (-4.4 to -3.46)
High-middle SDI	Maternal obstructed labor and uterine rupture	5	4	2012	2016	-0.391869	0.701	-0.2 (-1.29 to 0.9)
High-middle SDI	Maternal obstructed labor and uterine rupture	5	5	2016	2021	-22.7114	<0.001	-5.1 (-5.57 to -4.64)
High-middle SDI	Maternal sepsis and other maternal infections	5	0	1990	1992	-7.1357	<0.001	-9.05 (-11.59 to -6.43)
High-middle SDI	Maternal sepsis and other maternal infections	5	1	1992	1997	-14.8379	<0.001	-6.04 (-6.88 to -5.2)
High-middle SDI	Maternal sepsis and other maternal infections	5	2	1997	2005	-29.5394	<0.001	-5.11 (-5.47 to -4.75)
High-middle SDI	Maternal sepsis and other maternal infections	5	3	2005	2012	-15.0141	<0.001	-3.32 (-3.78 to -2.85)
High-middle SDI	Maternal sepsis and other maternal infections	5	4	2012	2016	-1.94465	0.071	-1.28 (-2.67 to 0.12)
High-middle SDI	Maternal sepsis and other maternal infections	5	5	2016	2021	-18.7895	<0.001	-5.43 (-6.03 to -4.83)
Low SDI	Ectopic pregnancy	3	0	1990	2001	-20.0594	<0.001	-0.65 (-0.72 to -0.58)
Low SDI	Ectopic pregnancy	3	1	2001	2008	-19.3484	<0.001	-1.56 (-1.73 to -1.4)
Low SDI	Ectopic pregnancy	3	2	2008	2014	-3.44242	0.002	-0.37 (-0.59 to -0.15)
Low SDI	Ectopic pregnancy	3	3	2014	2021	-28.6519	<0.001	-1.83 (-1.96 to -1.7)
Low SDI	Maternal abortion and miscarriage	3	0	1990	1999	-50.3187	<0.001	-3.02 (-3.14 to -2.9)
Low SDI	Maternal abortion and miscarriage	3	1	1999	2006	-46.9177	<0.001	-5.16 (-5.38 to -4.94)
Low SDI	Maternal abortion and miscarriage	3	2	2006	2017	-111.973	<0.001	-5.66 (-5.76 to -5.55)
Low SDI	Maternal abortion and miscarriage	3	3	2017	2021	-31.9592	<0.001	-6.53 (-6.94 to -6.12)
Low SDI	Maternal hemorrhage	4	0	1990	1995	-13.062	<0.001	-1.49 (-1.73 to -1.25)
Low SDI	Maternal hemorrhage	4	1	1995	1999	-8.48612	<0.001	-2.16 (-2.69 to -1.63)
Low SDI	Maternal hemorrhage	4	2	1999	2007	-43.0403	<0.001	-2.92 (-3.06 to -2.78)
Low SDI	Maternal hemorrhage	4	3	2007	2012	-25.2807	<0.001	-4.03 (-4.36 to -3.7)
Low SDI	Maternal hemorrhage	4	4	2012	2021	-120.049	<0.001	-5.48 (-5.58 to -5.39)
Low SDI	Maternal hypertensive disorders	3	0	1990	1999	-31.13	<0.001	-1.8 (-1.92 to -1.68)
Low SDI	Maternal hypertensive disorders	3	1	1999	2007	-28.4085	<0.001	-2.4 (-2.57 to -2.22)
Low SDI	Maternal hypertensive disorders	3	2	2007	2017	-53.8157	<0.001	-3.09 (-3.21 to -2.97)
Low SDI	Maternal hypertensive disorders	3	3	2017	2021	-20.9779	<0.001	-4.15 (-4.55 to -3.75)
Low SDI	Maternal obstructed labor and uterine rupture	3	0	1990	1999	-28.5528	<0.001	-1.8 (-1.92 to -1.67)
Low SDI	Maternal obstructed labor and uterine rupture	3	1	1999	2002	-6.09808	<0.001	-4.15 (-5.52 to -2.75)
Low SDI	Maternal obstructed labor and uterine rupture	3	2	2002	2007	-14.3767	<0.001	-3.11 (-3.55 to -2.67)
Low SDI	Maternal obstructed labor and uterine rupture	3	3	2007	2021	-119.545	<0.001	-3.82 (-3.88 to -3.75)
Low SDI	Maternal sepsis and other maternal infections	5	0	1990	2000	4.22446	0.001	0.15 (0.08 to 0.23)
Low SDI	Maternal sepsis and other maternal infections	5	1	2000	2005	-15.1607	<0.001	-2.23 (-2.54 to -1.92)
Low SDI	Maternal sepsis and other maternal infections	5	2	2005	2008	-8.91481	<0.001	-4.1 (-5.06 to -3.14)
Low SDI	Maternal sepsis and other maternal infections	5	3	2008	2012	-24.2388	<0.001	-5.53 (-6.01 to -5.06)
Low SDI	Maternal sepsis and other maternal infections	5	4	2012	2015	-14.3259	<0.001	-6.51 (-7.44 to -5.57)
Low SDI	Maternal sepsis and other maternal infections	5	5	2015	2021	-61.9925	<0.001	-4.8 (-4.96 to -4.64)
Low-middle SDI	Ectopic pregnancy	4	0	1990	1992	-1.73111	0.101	-1.36 (-2.99 to 0.29)
Low-middle SDI	Ectopic pregnancy	4	1	1992	1997	0.64883	0.525	0.16 (-0.36 to 0.69)
Low-middle SDI	Ectopic pregnancy	4	2	1997	2001	6.6925	<0.001	2.69 (1.84 to 3.55)
Low-middle SDI	Ectopic pregnancy	4	3	2001	2011	-5.54191	<0.001	-0.4 (-0.55 to -0.25)
Low-middle SDI	Ectopic pregnancy	4	4	2011	2021	-34.415	<0.001	-2.1 (-2.23 to -1.98)
Low-middle SDI	Maternal abortion and miscarriage	4	0	1990	1998	-30.2347	<0.001	-4.91 (-5.25 to -4.58)
Low-middle SDI	Maternal abortion and miscarriage	4	1	1998	2003	-17.6686	<0.001	-8.18 (-9.11 to -7.24)
Low-middle SDI	Maternal abortion and miscarriage	4	2	2003	2007	-6.99374	<0.001	-5.2 (-6.71 to -3.67)
Low-middle SDI	Maternal abortion and miscarriage	4	3	2007	2019	-70.7281	<0.001	-7.03 (-7.23 to -6.82)
Low-middle SDI	Maternal abortion and miscarriage	4	4	2019	2021	-3.11501	0.006	-4.65 (-7.66 to -1.54)
Low-middle SDI	Maternal hemorrhage	4	0	1990	2000	-54.009	<0.001	-3.29 (-3.42 to -3.17)
Low-middle SDI	Maternal hemorrhage	4	1	2000	2012	-129.93	<0.001	-6.74 (-6.84 to -6.63)
Low-middle SDI	Maternal hemorrhage	4	2	2012	2015	-12.2359	<0.001	-9.28 (-10.79 to -7.75)
Low-middle SDI	Maternal hemorrhage	4	3	2015	2019	-18.7989	<0.001	-7.21 (-7.98 to -6.43)
Low-middle SDI	Maternal hemorrhage	4	4	2019	2021	-6.94841	<0.001	-5.38 (-6.95 to -3.79)
Low-middle SDI	Maternal hypertensive disorders	5	0	1990	1992	-5.45017	<0.001	-3.63 (-5.01 to -2.22)
Low-middle SDI	Maternal hypertensive disorders	5	1	1992	1999	-19.2038	<0.001	-2.18 (-2.41 to -1.94)
Low-middle SDI	Maternal hypertensive disorders	5	2	1999	2002	-7.26076	<0.001	-4.8 (-6.17 to -3.42)
Low-middle SDI	Maternal hypertensive disorders	5	3	2002	2014	-87.4167	<0.001	-3.92 (-4.01 to -3.82)
Low-middle SDI	Maternal hypertensive disorders	5	4	2014	2017	-4.54723	<0.001	-3.04 (-4.43 to -1.62)
Low-middle SDI	Maternal hypertensive disorders	5	5	2017	2021	-21.0415	<0.001	-4.41 (-4.85 to -3.97)
Low-middle SDI	Maternal obstructed labor and uterine rupture	3	0	1990	2000	-32.7744	<0.001	-3.4 (-3.61 to -3.18)
Low-middle SDI	Maternal obstructed labor and uterine rupture	3	1	2000	2008	-37.7876	<0.001	-6.61 (-6.96 to -6.26)
Low-middle SDI	Maternal obstructed labor and uterine rupture	3	2	2008	2014	-17.1628	<0.001	-5.07 (-5.66 to -4.47)
Low-middle SDI	Maternal obstructed labor and uterine rupture	3	3	2014	2021	-21.4976	<0.001	-3.82 (-4.18 to -3.45)
Low-middle SDI	Maternal sepsis and other maternal infections	5	0	1990	1996	-5.47311	<0.001	-1.03 (-1.43 to -0.63)
Low-middle SDI	Maternal sepsis and other maternal infections	5	1	1996	2000	4.09373	0.001	2.33 (1.11 to 3.56)
Low-middle SDI	Maternal sepsis and other maternal infections	5	2	2000	2007	-22.3456	<0.001	-4.16 (-4.54 to -3.77)
Low-middle SDI	Maternal sepsis and other maternal infections	5	3	2007	2015	-58.3469	<0.001	-8.39 (-8.68 to -8.1)
Low-middle SDI	Maternal sepsis and other maternal infections	5	4	2015	2019	-13.2692	<0.001	-7.18 (-8.29 to -6.07)
Low-middle SDI	Maternal sepsis and other maternal infections	5	5	2019	2021	-4.27548	0.001	-4.69 (-6.95 to -2.38)
Middle SDI	Ectopic pregnancy	3	0	1990	1996	-16.776	<0.001	-3.45 (-3.87 to -3.03)
Middle SDI	Ectopic pregnancy	3	1	1996	2004	7.93239	<0.001	1.32 (0.97 to 1.67)
Middle SDI	Ectopic pregnancy	3	2	2004	2012	-27.1507	<0.001	-4.39 (-4.72 to -4.06)
Middle SDI	Ectopic pregnancy	3	3	2012	2021	-21.4162	<0.001	-2.39 (-2.62 to -2.16)
Middle SDI	Maternal abortion and miscarriage	2	0	1990	1998	-24.0969	<0.001	-4.42 (-4.79 to -4.05)
Middle SDI	Maternal abortion and miscarriage	2	1	1998	2015	-100.004	<0.001	-6.39 (-6.51 to -6.26)
Middle SDI	Maternal abortion and miscarriage	2	2	2015	2021	-14.9539	<0.001	-4.26 (-4.83 to -3.68)
Middle SDI	Maternal hemorrhage	4	0	1990	1993	-10.2661	<0.001	-4.79 (-5.74 to -3.83)
Middle SDI	Maternal hemorrhage	4	1	1993	1997	-7.56193	<0.001	-3.55 (-4.51 to -2.58)
Middle SDI	Maternal hemorrhage	4	2	1997	2002	-19.134	<0.001	-5.62 (-6.22 to -5.02)
Middle SDI	Maternal hemorrhage	4	3	2002	2017	-159.894	<0.001	-6.91 (-7 to -6.83)
Middle SDI	Maternal hemorrhage	4	4	2017	2021	-18.0178	<0.001	-5.3 (-5.9 to -4.7)
Middle SDI	Maternal hypertensive disorders	3	0	1990	1993	-11.323	<0.001	-4.81 (-5.67 to -3.95)
Middle SDI	Maternal hypertensive disorders	3	1	1993	2005	-51.0712	<0.001	-2.95 (-3.07 to -2.84)
Middle SDI	Maternal hypertensive disorders	3	2	2005	2011	-21.5377	<0.001	-4.11 (-4.5 to -3.72)
Middle SDI	Maternal hypertensive disorders	3	3	2011	2021	-43.6774	<0.001	-2.92 (-3.06 to -2.78)
Middle SDI	Maternal obstructed labor and uterine rupture	5	0	1990	1993	-4.74111	<0.001	-2.83 (-4.08 to -1.57)
Middle SDI	Maternal obstructed labor and uterine rupture	5	1	1993	1999	-5.83393	<0.001	-1.57 (-2.14 to -1)
Middle SDI	Maternal obstructed labor and uterine rupture	5	2	1999	2005	-18.707	<0.001	-4.95 (-5.49 to -4.39)
Middle SDI	Maternal obstructed labor and uterine rupture	5	3	2005	2012	-17.7597	<0.001	-3.57 (-3.99 to -3.15)
Middle SDI	Maternal obstructed labor and uterine rupture	5	4	2012	2016	-3.48749	0.003	-2.09 (-3.35 to -0.82)
Middle SDI	Maternal obstructed labor and uterine rupture	5	5	2016	2021	-15.4532	<0.001	-4.1 (-4.66 to -3.55)
Middle SDI	Maternal sepsis and other maternal infections	4	0	1990	1995	-11.1543	<0.001	-3.84 (-4.54 to -3.13)
Middle SDI	Maternal sepsis and other maternal infections	4	1	1995	2003	-4.27389	<0.001	-0.89 (-1.33 to -0.45)
Middle SDI	Maternal sepsis and other maternal infections	4	2	2003	2006	-3.13453	0.006	-4.8 (-7.88 to -1.61)
Middle SDI	Maternal sepsis and other maternal infections	4	3	2006	2015	-38.2126	<0.001	-6.33 (-6.67 to -5.99)
Middle SDI	Maternal sepsis and other maternal infections	4	4	2015	2021	-13.0599	<0.001	-3.4 (-3.94 to -2.86)
