# Supplementary material for: Maternal Disorders among Women Aged 15 to 49 Years Global Trends, Inequalities, and Projections from the GBD Study 2021
Source: Research Square preprint supplement (doi:10.21203/rs.3.rs-5848433/v1), 2025-04-04
Supplement: Supplementary file 3 [file 41ce025a85570454e2e6f1c3.xlsx]

## Sheet: Table S4
location	cause	Overll difference	Aging	Population	Epidemiological change
Global	Ectopic pregnancy	107657	-16244.24 (-15.09%)	126871.23 (117.85%)	-2970.29 (-2.76%)
Low SDI	Ectopic pregnancy	107009	-750.76 (-0.7%)	174586.13 (163.15%)	-66826.44 (-62.45%)
Middle SDI	Ectopic pregnancy	-16535.2	-3116.78 (18.85%)	16079.36 (-97.24%)	-29497.79 (178.39%)
High-middle SDI	Ectopic pregnancy	-13887.3	-923.32 (6.65%)	1154.35 (-8.31%)	-14118.3 (101.66%)
High SDI	Ectopic pregnancy	-4584.07	-245.27 (5.35%)	305.95 (-6.67%)	-4644.75 (101.32%)
Low-middle SDI	Ectopic pregnancy	35535.6	-1717.27 (-4.83%)	49626.41 (139.65%)	-12373.56 (-34.82%)
Global	Maternal abortion and miscarriage	-1.79681e+06	-21203.4 (1.18%)	793272.57 (-44.15%)	-2568877.82 (142.97%)
Low SDI	Maternal abortion and miscarriage	-557887	303.77 (-0.05%)	1020598.33 (-182.94%)	-1578788.9 (282.99%)
Middle SDI	Maternal abortion and miscarriage	-277884	480.99 (-0.17%)	82954.1 (-29.85%)	-361319.52 (130.03%)
High-middle SDI	Maternal abortion and miscarriage	-61842.8	-3044.57 (4.92%)	3979.15 (-6.43%)	-62777.4 (101.51%)
High SDI	Maternal abortion and miscarriage	-8558.78	-428.62 (5.01%)	553.86 (-6.47%)	-8684.02 (101.46%)
Low-middle SDI	Maternal abortion and miscarriage	-889517	9846.5 (-1.11%)	571942.16 (-64.3%)	-1471306.06 (165.4%)
Global	Maternal hemorrhage	-4.11145e+06	-265791.02 (6.46%)	2050837.85 (-49.88%)	-5896497 (143.42%)
Low SDI	Maternal hemorrhage	-391831	-6656.61 (1.7%)	1961690.4 (-500.65%)	-2346865.28 (598.95%)
Middle SDI	Maternal hemorrhage	-1.20978e+06	-67298.6 (5.56%)	335961.25 (-27.77%)	-1478437.68 (122.21%)
High-middle SDI	Maternal hemorrhage	-170873	-9978.96 (5.84%)	10855.74 (-6.35%)	-171750.16 (100.51%)
High SDI	Maternal hemorrhage	-24110.7	-908.26 (3.77%)	1558.82 (-6.47%)	-24761.26 (102.7%)
Low-middle SDI	Maternal hemorrhage	-2.31359e+06	-63067.41 (2.73%)	1582916.94 (-68.42%)	-3833438.72 (165.69%)
Global	Maternal hypertensive disorders	-998259	-173474.54 (17.38%)	1160152.44 (-116.22%)	-1984936.89 (198.84%)
Low SDI	Maternal hypertensive disorders	59852.6	-7194.5 (-12.02%)	1162202.84 (1941.78%)	-1095155.77 (-1829.76%)
Middle SDI	Maternal hypertensive disorders	-355634	-37564.87 (10.56%)	173287.73 (-48.73%)	-491356.66 (138.16%)
High-middle SDI	Maternal hypertensive disorders	-103572	-9358.09 (9.04%)	8154.1 (-7.87%)	-102368.31 (98.84%)
High SDI	Maternal hypertensive disorders	-12655.8	-1345.28 (10.63%)	1874.76 (-14.81%)	-13185.31 (104.18%)
Low-middle SDI	Maternal hypertensive disorders	-586141	-32623.23 (5.57%)	822967.43 (-140.4%)	-1376485.67 (234.84%)
Global	Maternal obstructed labor and uterine rupture	-722077	-26695.53 (3.7%)	561318.08 (-77.74%)	-1256700.04 (174.04%)
Low SDI	Maternal obstructed labor and uterine rupture	-42523.4	-1127.16 (2.65%)	531235.81 (-1249.28%)	-572632.08 (1346.63%)
Middle SDI	Maternal obstructed labor and uterine rupture	-136365	-6784.7 (4.98%)	69929.23 (-51.28%)	-199509.26 (146.31%)
High-middle SDI	Maternal obstructed labor and uterine rupture	-24202.8	-2414.95 (9.98%)	2351.92 (-9.72%)	-24139.73 (99.74%)
High SDI	Maternal obstructed labor and uterine rupture	-4082.69	-539.26 (13.21%)	667.37 (-16.35%)	-4210.81 (103.14%)
Low-middle SDI	Maternal obstructed labor and uterine rupture	-515075	5986.17 (-1.16%)	476137.88 (-92.44%)	-997198.81 (193.6%)
Global	Maternal sepsis and other maternal infections	-529714	-89867.67 (16.97%)	553000.68 (-104.4%)	-992846.6 (187.43%)
Low SDI	Maternal sepsis and other maternal infections	-35706.7	-3640.87 (10.2%)	781307.89 (-2188.13%)	-813373.72 (2277.93%)
Middle SDI	Maternal sepsis and other maternal infections	-151502	-22650.19 (14.95%)	63130.24 (-41.67%)	-191982.22 (126.72%)
High-middle SDI	Maternal sepsis and other maternal infections	-39757.5	-4947.91 (12.45%)	3111.86 (-7.83%)	-37921.43 (95.38%)
High SDI	Maternal sepsis and other maternal infections	-6995.04	-773.86 (11.06%)	739.28 (-10.57%)	-6960.46 (99.51%)
Low-middle SDI	Maternal sepsis and other maternal infections	-295595	-18983.56 (6.42%)	297173.91 (-100.53%)	-573785.69 (194.11%)
