# Supplementary material for: Maternal Disorders among Women Aged 15 to 49 Years Global Trends, Inequalities, and Projections from the GBD Study 2021
Source: Research Square preprint supplement (doi:10.21203/rs.3.rs-5848433/v1), 2025-04-04
Supplement: Supplementary file 4 [file 512a9f53056f238ce5d8129f.xlsx]

## Sheet: Table S5
cause	measure	sex	location	age	1992 to 1996	1997 to 2001	2002 to 2006	2007 to 2011	2012 to 2016	2017 to 2021
Maternal sepsis and other maternal infections	Incidence	Female	Global	15 to 19	1416.55 (1028.18 to 1866.29)	1305.84 (949.27 to 1723.52)	1183.16 (858.13 to 1555.4)	1126.2 (822.7 to 1475.29)	1006.11 (735.15 to 1320)	838.65 (608.58 to 1106.02)
Maternal sepsis and other maternal infections	Incidence	Female	Global	20 to 24	3433.17 (2204.32 to 4772.4)	3161.51 (2045.14 to 4393.99)	2949.14 (1929.09 to 4076.34)	2698.09 (1772.93 to 3724.37)	2522.24 (1646.96 to 3491.29)	2227.2 (1438.28 to 3110.17)
Maternal sepsis and other maternal infections	Incidence	Female	Global	25 to 29	2161.61 (1503.79 to 3024.28)	2029.37 (1413.27 to 2829.92)	1960.79 (1379.87 to 2697.13)	1885.9 (1330.6 to 2591.42)	1867.58 (1307.36 to 2569.72)	1768.98 (1235.25 to 2445.55)
Maternal sepsis and other maternal infections	Incidence	Female	Global	30 to 34	1077.75 (712.62 to 1526.3)	1024.52 (683.21 to 1449.47)	1025.57 (692.68 to 1439.75)	1039.84 (706.05 to 1449.55)	1079.8 (734.6 to 1510.35)	1055.93 (711.05 to 1483.36)
Maternal sepsis and other maternal infections	Incidence	Female	Global	35 to 39	584.49 (381.07 to 863.79)	547.18 (357.79 to 809.49)	524.91 (345.8 to 773.48)	532.55 (352.85 to 781.02)	565.99 (374.44 to 828.19)	559.41 (368.36 to 822.97)
Maternal sepsis and other maternal infections	Incidence	Female	Global	40 to 44	272.81 (189.01 to 382.03)	253.81 (176.04 to 354.64)	238.53 (166.06 to 330.83)	226.97 (158.39 to 313.46)	234.59 (164.28 to 323.98)	237.88 (165.53 to 330.31)
Maternal sepsis and other maternal infections	Incidence	Female	Global	45 to 49	107.59 (70.93 to 149.1)	90.09 (59.07 to 124.09)	83.36 (54.53 to 114.8)	76.28 (49.9 to 105.13)	70.01 (45.76 to 96.52)	66.44 (43.19 to 91.86)
Maternal hemorrhage	Incidence	Female	Global	15 to 19	655.92 (441.18 to 948.79)	623.33 (422.29 to 898.23)	575.51 (392.68 to 827.56)	555.64 (382.89 to 799.13)	508.73 (347.02 to 732.92)	437.01 (295.87 to 632.38)
Maternal hemorrhage	Incidence	Female	Global	20 to 24	1627.88 (1073.08 to 2414.82)	1552.8 (1030.35 to 2298.25)	1451.47 (962.36 to 2122.1)	1342.99 (904.46 to 1955.23)	1271.36 (852.29 to 1850.9)	1152.76 (765.25 to 1687.25)
Maternal hemorrhage	Incidence	Female	Global	25 to 29	1592.85 (1043.12 to 2234.68)	1527.43 (1008.74 to 2135.58)	1482.37 (989.78 to 2072)	1454.22 (986.38 to 2009.33)	1451.61 (984.62 to 2001.77)	1384.36 (927.89 to 1914.53)
Maternal hemorrhage	Incidence	Female	Global	30 to 34	1110.99 (734.52 to 1563.58)	1061.43 (707.3 to 1489.93)	1066.19 (718.83 to 1491.1)	1084.55 (742 to 1495.51)	1107.92 (757.1 to 1523.37)	1080.47 (730.41 to 1494.05)
Maternal hemorrhage	Incidence	Female	Global	35 to 39	654.71 (418.01 to 961.12)	617.42 (396.35 to 908.68)	592.32 (383.86 to 859.5)	583.95 (385.03 to 834.23)	601.18 (397.07 to 853.86)	589.38 (385.91 to 847.53)
Maternal hemorrhage	Incidence	Female	Global	40 to 44	292.52 (199.54 to 411.88)	277.15 (191.17 to 387.81)	260.89 (181.06 to 362.28)	236 (165.69 to 324.79)	234.54 (165.01 to 323.9)	236.34 (164.42 to 329.01)
Maternal hemorrhage	Incidence	Female	Global	45 to 49	103.14 (70.06 to 142.83)	89.54 (61.72 to 121.7)	83.43 (57.81 to 112.65)	70.69 (49.02 to 95.34)	61.7 (42.69 to 83.31)	58.51 (40.3 to 79.26)
Maternal hypertensive disorders	Incidence	Female	Global	15 to 19	701.93 (489.63 to 994.01)	676.57 (476.61 to 954.67)	634.95 (452.71 to 885.62)	587.38 (421.51 to 808.13)	541.81 (387.65 to 749.51)	480.94 (342.41 to 668.46)
Maternal hypertensive disorders	Incidence	Female	Global	20 to 24	1671.05 (1126.93 to 2350.65)	1775.55 (1194.85 to 2492.62)	1765.19 (1220.65 to 2427.95)	1493.95 (1056.33 to 2000.3)	1425.28 (1000.31 to 1898.9)	1375.84 (953.96 to 1842.7)
Maternal hypertensive disorders	Incidence	Female	Global	25 to 29	1700.65 (1270.44 to 2249.06)	1715.58 (1280.39 to 2260.36)	1774.82 (1352.58 to 2286.46)	1669.43 (1307.45 to 2099.58)	1607.29 (1257.32 to 2029.98)	1595.94 (1232.15 to 2034.69)
Maternal hypertensive disorders	Incidence	Female	Global	30 to 34	1406.35 (1037.6 to 1867.54)	1329.28 (987.14 to 1749.63)	1357.97 (1035.6 to 1745.22)	1417.4 (1102.98 to 1784.98)	1460.61 (1130.68 to 1852.63)	1426.79 (1083.16 to 1841.99)
Maternal hypertensive disorders	Incidence	Female	Global	35 to 39	947.26 (686.62 to 1237.49)	889.45 (649.57 to 1163.51)	847.19 (635.75 to 1083.92)	883.2 (679.11 to 1108.11)	942.2 (724.16 to 1185.32)	936.79 (702.05 to 1198.69)
Maternal hypertensive disorders	Incidence	Female	Global	40 to 44	422.13 (309.78 to 537.78)	395.56 (293.37 to 501.01)	370.96 (281.79 to 459.56)	355.71 (275.48 to 432.45)	365.99 (283.21 to 444.55)	373.95 (284.95 to 456.86)
Maternal hypertensive disorders	Incidence	Female	Global	45 to 49	134.56 (102.72 to 165.16)	112.26 (85.92 to 137.1)	103.39 (80.19 to 124.21)	93.88 (74.34 to 111.51)	85.71 (67.94 to 101.65)	81.6 (64.41 to 96.92)
Maternal obstructed labor and uterine rupture	Incidence	Female	Global	15 to 19	729.65 (425.21 to 1083.17)	662.97 (386.51 to 978.28)	591.77 (346.89 to 866.15)	543.99 (321.15 to 793.24)	474.86 (280.29 to 697.46)	392.25 (230.02 to 580)
Maternal obstructed labor and uterine rupture	Incidence	Female	Global	20 to 24	2107.13 (1141.69 to 3363.35)	1920.1 (1047.51 to 3040.23)	1764.48 (976.79 to 2789.23)	1560.65 (887.66 to 2447.56)	1446.83 (824.57 to 2278.72)	1286.04 (730.59 to 2035.08)
Maternal obstructed labor and uterine rupture	Incidence	Female	Global	25 to 29	1840.07 (999.17 to 2891.68)	1688.19 (924.18 to 2652.69)	1577.74 (871.54 to 2473.28)	1470.93 (828.41 to 2267.92)	1439.96 (813.73 to 2222.6)	1385.22 (774.19 to 2157.97)
Maternal obstructed labor and uterine rupture	Incidence	Female	Global	30 to 34	1133.68 (640.63 to 1771.87)	1049.33 (591.03 to 1656.32)	1015.66 (581.69 to 1597)	988.66 (589.36 to 1514.37)	1005.6 (601.86 to 1542.53)	986.85 (576.91 to 1539.21)
Maternal obstructed labor and uterine rupture	Incidence	Female	Global	35 to 39	566.57 (309.1 to 884.85)	524.52 (290.17 to 821.5)	490.81 (277.72 to 762.39)	478.56 (275.8 to 728.22)	494.92 (287.32 to 753.27)	495.67 (280.57 to 761.8)
Maternal obstructed labor and uterine rupture	Incidence	Female	Global	40 to 44	202.58 (115.48 to 310.02)	184.01 (106.04 to 278.39)	168.76 (99.11 to 253.03)	154.81 (93 to 230.19)	157.78 (95.32 to 234.21)	161.23 (95.82 to 239.95)
Maternal obstructed labor and uterine rupture	Incidence	Female	Global	45 to 49	59.48 (32.68 to 95.34)	47.75 (26.36 to 76.28)	42.65 (23.86 to 67.62)	36.75 (21.2 to 57.5)	33.25 (19.2 to 52.11)	31.48 (18.06 to 49.27)
Ectopic pregnancy	Incidence	Female	Global	15 to 19	272.85 (181.79 to 380.74)	253.83 (169.16 to 354.33)	232.5 (155.27 to 323.9)	223.81 (149.82 to 309.44)	204.72 (137.09 to 284.59)	176.69 (118.01 to 245.59)
Ectopic pregnancy	Incidence	Female	Global	20 to 24	807.56 (538.06 to 1139.38)	724.86 (484.19 to 1022.81)	659.62 (442.92 to 934.54)	601.09 (403.1 to 849.54)	564.83 (376.6 to 801.63)	504.44 (333.43 to 721.57)
Ectopic pregnancy	Incidence	Female	Global	25 to 29	979.6 (615.43 to 1457.2)	901.72 (571.4 to 1332.97)	838.04 (534.85 to 1230.11)	783.15 (504.17 to 1148.32)	795.23 (510.51 to 1167.04)	750.73 (482.32 to 1106.07)
Ectopic pregnancy	Incidence	Female	Global	30 to 34	763.57 (536.55 to 1068.15)	743.69 (521.51 to 1034.41)	736.14 (517.91 to 1017.16)	729.01 (518.75 to 1002.8)	763.77 (547.11 to 1049.21)	762.83 (543.45 to 1049.61)
Ectopic pregnancy	Incidence	Female	Global	35 to 39	505 (309.03 to 772.46)	475.01 (292.08 to 728.78)	468.46 (291.45 to 716.98)	484.21 (306.9 to 721.03)	514.07 (327.19 to 754.52)	501.48 (317.69 to 743.46)
Ectopic pregnancy	Incidence	Female	Global	40 to 44	271.4 (179.35 to 370.22)	247.15 (164.27 to 336.17)	231.42 (154.82 to 314.14)	227.58 (155.23 to 308.81)	241.8 (166.25 to 327.02)	241.45 (165.47 to 326.34)
Ectopic pregnancy	Incidence	Female	Global	45 to 49	115.07 (67.33 to 176.44)	95.21 (55.77 to 145.73)	86.74 (50.75 to 132.5)	77 (45.99 to 116.91)	71.21 (42.8 to 107.79)	68.36 (40.93 to 103.65)
Maternal abortion and miscarriage	Incidence	Female	Global	15 to 19	2992.31 (2132.62 to 3955.95)	2736.27 (1944.47 to 3634.03)	2499.92 (1774.81 to 3310.28)	2415.18 (1738.77 to 3153.99)	2126.97 (1535.15 to 2772.32)	1745.57 (1244.69 to 2296.42)
Maternal abortion and miscarriage	Incidence	Female	Global	20 to 24	6989.19 (4483.28 to 9991.21)	6360.54 (4110.82 to 9019.28)	5858.14 (3810.85 to 8355.73)	5345.45 (3522.63 to 7553.89)	4970.33 (3267.62 to 7005.77)	4384.49 (2857.03 to 6254.95)
Maternal abortion and miscarriage	Incidence	Female	Global	25 to 29	4517.06 (3194.97 to 6206)	4264.78 (3005.68 to 5854.95)	3998.51 (2799.92 to 5553.67)	3693.16 (2593.77 to 5069.27)	3560.44 (2501.67 to 4857.05)	3421.04 (2407.41 to 4687.18)
Maternal abortion and miscarriage	Incidence	Female	Global	30 to 34	2472.45 (1689.95 to 3436.22)	2356.77 (1605.54 to 3266.21)	2269.05 (1528.33 to 3170.09)	2197.7 (1488.97 to 3062.89)	2200.64 (1490.99 to 3065.19)	2145.12 (1444.05 to 2991.06)
Maternal abortion and miscarriage	Incidence	Female	Global	35 to 39	1464.07 (1010.02 to 2059.44)	1398.64 (975.04 to 1955.68)	1326.8 (919.22 to 1869.52)	1338.75 (929.35 to 1871.38)	1391.72 (964.57 to 1942.73)	1380.93 (952.65 to 1942.58)
Maternal abortion and miscarriage	Incidence	Female	Global	40 to 44	566.2 (399.12 to 792.85)	530.65 (375.1 to 737.09)	500.72 (354.87 to 690.65)	486.09 (348.19 to 664.92)	501.18 (362.13 to 681.11)	508.26 (364.63 to 696.17)
Maternal abortion and miscarriage	Incidence	Female	Global	45 to 49	138.89 (99.83 to 185.89)	114.68 (82.05 to 154.52)	105.22 (74.67 to 141.34)	96.57 (69.46 to 129.42)	87.7 (63.22 to 117.69)	82.38 (59.16 to 110.69)
