# Supplementary material for: Maternal Disorders among Women Aged 15 to 49 Years Global Trends, Inequalities, and Projections from the GBD Study 2021
Source: Research Square preprint supplement (doi:10.21203/rs.3.rs-5848433/v1), 2025-04-04
Supplement: Supplementary file 5 [file 783561df76824737654fdb92.xlsx]

## Sheet: Table S6
age	sex	year	pred_val	pred_low	pred_up	measure	location	cause
15 to 19	Female	1990	1501.23807779568	1499.73535942931	1502.73872796162	Incidence	Global	Maternal sepsis and other maternal infections
15 to 19	Female	1991	1475.29838894921	1473.80797464304	1476.78676217326	Incidence	Global	Maternal sepsis and other maternal infections
15 to 19	Female	1992	1453.19538904209	1451.71513304638	1454.6736270154	Incidence	Global	Maternal sepsis and other maternal infections
15 to 19	Female	1993	1433.94305175175	1432.47276139145	1435.4113449735	Incidence	Global	Maternal sepsis and other maternal infections
15 to 19	Female	1994	1415.91486180058	1414.45648193136	1417.37126570674	Incidence	Global	Maternal sepsis and other maternal infections
15 to 19	Female	1995	1399.36650462171	1397.92229583069	1400.80875883872	Incidence	Global	Maternal sepsis and other maternal infections
15 to 19	Female	1996	1381.34975118785	1379.92266461993	1382.7749074759	Incidence	Global	Maternal sepsis and other maternal infections
15 to 19	Female	1997	1358.98514390371	1357.57899769352	1360.38938980803	Incidence	Global	Maternal sepsis and other maternal infections
15 to 19	Female	1998	1333.61768833808	1332.23557280839	1334.9979377294	Incidence	Global	Maternal sepsis and other maternal infections
15 to 19	Female	1999	1306.98610651478	1305.62993828558	1308.34044490092	Incidence	Global	Maternal sepsis and other maternal infections
15 to 19	Female	2000	1280.93000299623	1279.60059933218	1282.25761313557	Incidence	Global	Maternal sepsis and other maternal infections
15 to 19	Female	2001	1253.63292521822	1252.33214778932	1254.93194751227	Incidence	Global	Maternal sepsis and other maternal infections
15 to 19	Female	2002	1225.25856112196	1223.98657868107	1226.52882777233	Incidence	Global	Maternal sepsis and other maternal infections
15 to 19	Female	2003	1199.31601815049	1198.06955122634	1200.56080478589	Incidence	Global	Maternal sepsis and other maternal infections
15 to 19	Female	2004	1177.98361581695	1176.75730442101	1179.20827564385	Incidence	Global	Maternal sepsis and other maternal infections
15 to 19	Female	2005	1162.60280967281	1161.3900286572	1163.81395925656	Incidence	Global	Maternal sepsis and other maternal infections
15 to 19	Female	2006	1152.84710836994	1151.64089890145	1154.05	Incidence	Global	Maternal sepsis and other maternal infections
15 to 19	Female	2007	1145.32004389944	1144.11628276541	1146.52219274551	Incidence	Global	Maternal sepsis and other maternal infections
15 to 19	Female	2008	1138.15461787739	1136.95121605344	1139.35641350471	Incidence	Global	Maternal sepsis and other maternal infections
15 to 19	Female	2009	1129.63848727069	1128.43514734939	1130.84022812104	Incidence	Global	Maternal sepsis and other maternal infections
15 to 19	Female	2010	1118.08877735006	1116.88678172612	1119.28918439722	Incidence	Global	Maternal sepsis and other maternal infections
15 to 19	Female	2011	1098.99806801979	1097.80268606595	1100.19188131234	Incidence	Global	Maternal sepsis and other maternal infections
15 to 19	Female	2012	1071.43006410848	1070.24756573786	1072.61102466059	Incidence	Global	Maternal sepsis and other maternal infections
15 to 19	Female	2013	1038.96573108741	1037.80000323358	1040.12995871872	Incidence	Global	Maternal sepsis and other maternal infections
15 to 19	Female	2014	1005.21599355513	1004.06870147718	1006.36182550879	Incidence	Global	Maternal sepsis and other maternal infections
15 to 19	Female	2015	973.58305882312	972.45407343954	974.710622619121	Incidence	Global	Maternal sepsis and other maternal infections
15 to 19	Female	2016	941.188770165944	940.079375648325	942.296783407581	Incidence	Global	Maternal sepsis and other maternal infections
15 to 19	Female	2017	904.897345182016	903.810889677217	905.982465555555	Incidence	Global	Maternal sepsis and other maternal infections
15 to 19	Female	2018	868.157988307541	867.096135036947	869.218554294432	Incidence	Global	Maternal sepsis and other maternal infections
15 to 19	Female	2019	834.412045167368	833.37440675333	835.448441316227	Incidence	Global	Maternal sepsis and other maternal infections
15 to 19	Female	2020	803.973366892801	802.959111643688	804.986421349274	Incidence	Global	Maternal sepsis and other maternal infections
15 to 19	Female	2021	784.097023330943	783.100854179637	785.092019664401	Incidence	Global	Maternal sepsis and other maternal infections
15 to 19	Female	2022	757.467075131335	680.554458988603	840.383194264525	Incidence	Global	Maternal sepsis and other maternal infections
15 to 19	Female	2023	732.378985637661	647.209810876189	825.230920149513	Incidence	Global	Maternal sepsis and other maternal infections
15 to 19	Female	2024	708.297315711254	612.412302631036	814.447486599225	Incidence	Global	Maternal sepsis and other maternal infections
15 to 19	Female	2025	685.214035381873	576.946128633133	807.362461332272	Incidence	Global	Maternal sepsis and other maternal infections
15 to 19	Female	2026	663.118506663082	541.493894558576	803.371873009035	Incidence	Global	Maternal sepsis and other maternal infections
15 to 19	Female	2027	641.99791647925	506.575210821953	802.009827320671	Incidence	Global	Maternal sepsis and other maternal infections
15 to 19	Female	2028	621.837666427464	472.562231258908	802.939312309204	Incidence	Global	Maternal sepsis and other maternal infections
15 to 19	Female	2029	602.621722387043	439.712929047865	805.922781503886	Incidence	Global	Maternal sepsis and other maternal infections
15 to 19	Female	2030	584.332937301309	408.201	810.794993371315	Incidence	Global	Maternal sepsis and other maternal infections
15 to 19	Female	2031	566.953351900542	378.138490886651	817.442849276183	Incidence	Global	Maternal sepsis and other maternal infections
15 to 19	Female	2032	550.46447587468	349.591692194008	825.791470247489	Incidence	Global	Maternal sepsis and other maternal infections
15 to 19	Female	2033	534.847551247484	322.592831142192	835.794799828172	Incidence	Global	Maternal sepsis and other maternal infections
15 to 19	Female	2034	520.083797550661	297.148261758714	847.429272654284	Incidence	Global	Maternal sepsis and other maternal infections
15 to 19	Female	2035	506.154640837746	273.244625774946	860.689525695791	Incidence	Global	Maternal sepsis and other maternal infections
15 to 19	Female	2036	493.041928234967	250.853503270862	875.585478922922	Incidence	Global	Maternal sepsis and other maternal infections
15 to 19	Female	2037	480.728129812132	229.935013960033	892.14034463248	Incidence	Global	Maternal sepsis and other maternal infections
15 to 19	Female	2038	469.196529743692	210.440658250534	910.389285272896	Incidence	Global	Maternal sepsis and other maternal infections
15 to 19	Female	2039	458.431408887211	192.315592356158	930.378534345862	Incidence	Global	Maternal sepsis and other maternal infections
15 to 19	Female	2040	448.41822106014	175.50046900751	952.164856696489	Incidence	Global	Maternal sepsis and other maternal infections
15 to 19	Female	2041	439.143765447705	159.932938079492	975.815267241603	Incidence	Global	Maternal sepsis and other maternal infections
15 to 19	Female	2042	430.596357767438	145.548874334593	1001.40695313001	Incidence	Global	Maternal sepsis and other maternal infections
15 to 19	Female	2043	422.766002882525	132.283382492107	1029.02736224252	Incidence	Global	Maternal sepsis and other maternal infections
15 to 19	Female	2044	415.644571959778	120.07161802806	1058.7744331938	Incidence	Global	Maternal sepsis and other maternal infections
20 to 24	Female	1990	3791.73232498287	3789.2885527866	3794.17209082711	Incidence	Global	Maternal sepsis and other maternal infections
20 to 24	Female	1991	3684.28478174879	3681.88593108461	3686.67971138917	Incidence	Global	Maternal sepsis and other maternal infections
20 to 24	Female	1992	3585.84186626645	3583.48315349595	3588.19673524927	Incidence	Global	Maternal sepsis and other maternal infections
20 to 24	Female	1993	3497.55512289206	3495.23210743448	3499.87436369728	Incidence	Global	Maternal sepsis and other maternal infections
20 to 24	Female	1994	3421.34469342212	3419.05160461392	3423.63406643542	Incidence	Global	Maternal sepsis and other maternal infections
20 to 24	Female	1995	3358.95151182998	3356.68209605415	3361.21725921369	Incidence	Global	Maternal sepsis and other maternal infections
20 to 24	Female	1996	3304.35493505935	3302.10482038314	3306.60142137769	Incidence	Global	Maternal sepsis and other maternal infections
20 to 24	Female	1997	3251.08057191261	3248.84879345545	3253.30876066033	Incidence	Global	Maternal sepsis and other maternal infections
20 to 24	Female	1998	3201.73929706529	3199.52637201482	3203.94867038549	Incidence	Global	Maternal sepsis and other maternal infections
20 to 24	Female	1999	3157.24988122748	3155.05813873109	3159.43811088763	Incidence	Global	Maternal sepsis and other maternal infections
20 to 24	Female	2000	3118.9	3116.73629847383	3121.06960635622	Incidence	Global	Maternal sepsis and other maternal infections
20 to 24	Female	2001	3081.49899455239	3079.35636950555	3083.63818726119	Incidence	Global	Maternal sepsis and other maternal infections
20 to 24	Female	2002	3040.27558923845	3038.16241118143	3042.38538172611	Incidence	Global	Maternal sepsis and other maternal infections
20 to 24	Female	2003	2996.72048812091	2994.64005987847	2998.79758199294	Incidence	Global	Maternal sepsis and other maternal infections
20 to 24	Female	2004	2952.04631206026	2950.0012330395	2954.08811115026	Incidence	Global	Maternal sepsis and other maternal infections
20 to 24	Female	2005	2907.8123754133	2905.80451256237	2909.81701467156	Incidence	Global	Maternal sepsis and other maternal infections
20 to 24	Female	2006	2858.14519690165	2856.17839636441	2860.10883633358	Incidence	Global	Maternal sepsis and other maternal infections
20 to 24	Female	2007	2800.11324247542	2798.18956606955	2802.03382546825	Incidence	Global	Maternal sepsis and other maternal infections
20 to 24	Female	2008	2740.63829538092	2738.75508767817	2742.52	Incidence	Global	Maternal sepsis and other maternal infections
20 to 24	Female	2009	2687.7268087353	2685.87699711096	2689.57364741988	Incidence	Global	Maternal sepsis and other maternal infections
20 to 24	Female	2010	2648.50746199443	2646.67972768951	2650.33226134283	Incidence	Global	Maternal sepsis and other maternal infections
20 to 24	Female	2011	2619.21879473946	2617.40245362145	2621.03222370855	Incidence	Global	Maternal sepsis and other maternal infections
20 to 24	Female	2012	2590.13901252595	2588.32925068557	2591.94587977047	Incidence	Global	Maternal sepsis and other maternal infections
20 to 24	Female	2013	2560.11976647222	2558.31396663346	2561.92268690758	Incidence	Global	Maternal sepsis and other maternal infections
20 to 24	Female	2014	2527.52750748943	2525.72519642279	2529.32695497797	Incidence	Global	Maternal sepsis and other maternal infections
20 to 24	Female	2015	2491.01830040349	2489.22113386996	2492.81262265453	Incidence	Global	Maternal sepsis and other maternal infections
20 to 24	Female	2016	2439.48778943987	2437.70378289649	2441.26898549024	Incidence	Global	Maternal sepsis and other maternal infections
20 to 24	Female	2017	2370.20941632058	2368.44783571318	2371.96823725269	Incidence	Global	Maternal sepsis and other maternal infections
20 to 24	Female	2018	2293.69851224058	2291.96403682635	2295.43028704841	Incidence	Global	Maternal sepsis and other maternal infections
20 to 24	Female	2019	2220.21649685395	2218.50963309932	2221.92071885451	Incidence	Global	Maternal sepsis and other maternal infections
20 to 24	Female	2020	2153.05644883644	2151.37641392199	2154.73389780453	Incidence	Global	Maternal sepsis and other maternal infections
20 to 24	Female	2021	2098.9066202296	2097.24919873592	2100.56150203481	Incidence	Global	Maternal sepsis and other maternal infections
20 to 24	Female	2022	2076.65043861863	1895.67605443227	2269.68681104789	Incidence	Global	Maternal sepsis and other maternal infections
20 to 24	Female	2023	2007.66403392888	1820.95276937257	2207.6750823822	Incidence	Global	Maternal sepsis and other maternal infections
20 to 24	Female	2024	1940.73228106106	1743.26242017699	2153.73763303537	Incidence	Global	Maternal sepsis and other maternal infections
20 to 24	Female	2025	1876.19737611307	1662.65456271746	2108.84161176713	Incidence	Global	Maternal sepsis and other maternal infections
20 to 24	Female	2026	1814.22711323232	1579.29615606643	2073.55224940835	Incidence	Global	Maternal sepsis and other maternal infections
20 to 24	Female	2027	1754.74020007693	1493.65945304977	2047.66733820839	Incidence	Global	Maternal sepsis and other maternal infections
20 to 24	Female	2028	1697.71714263443	1407.12597174336	2030.06629605044	Incidence	Global	Maternal sepsis and other maternal infections
20 to 24	Female	2029	1643.13220145465	1320.97345441819	2019.67288833214	Incidence	Global	Maternal sepsis and other maternal infections
20 to 24	Female	2030	1590.95433881225	1236.23978323965	2015.59796396326	Incidence	Global	Maternal sepsis and other maternal infections
20 to 24	Female	2031	1541.14809002306	1153.71409438134	2017.15521074493	Incidence	Global	Maternal sepsis and other maternal infections
20 to 24	Female	2032	1493.67441055264	1073.9720472349	2023.8328219364	Incidence	Global	Maternal sepsis and other maternal infections
20 to 24	Female	2033	1448.4914760522	997.418363491415	2035.25773466972	Incidence	Global	Maternal sepsis and other maternal infections
20 to 24	Female	2034	1405.55543364493	924.324312818162	2051.16457958325	Incidence	Global	Maternal sepsis and other maternal infections
20 to 24	Female	2035	1364.82110387432	854.857689523497	2071.37172069271	Incidence	Global	Maternal sepsis and other maternal infections
20 to 24	Female	2036	1326.24263517434	789.106024331276	2095.76363040942	Incidence	Global	Maternal sepsis and other maternal infections
20 to 24	Female	2037	1289.77411417138	727.094462615399	2124.27818315287	Incidence	Global	Maternal sepsis and other maternal infections
20 to 24	Female	2038	1255.37013571301	668.799626764113	2156.89757328662	Incidence	Global	Maternal sepsis and other maternal infections
20 to 24	Female	2039	1222.98633693449	614.160488751477	2193.64185781461	Incidence	Global	Maternal sepsis and other maternal infections
20 to 24	Female	2040	1192.57990004417	563.087004935887	2234.56440055376	Incidence	Global	Maternal sepsis and other maternal infections
20 to 24	Female	2041	1164.11002886021	515.46705300653	2279.74870813205	Incidence	Global	Maternal sepsis and other maternal infections
20 to 24	Female	2042	1137.53840447466	471.172058195877	2329.30630209585	Incidence	Global	Maternal sepsis and other maternal infections
20 to 24	Female	2043	1112.82962577056	430.061588910661	2383.37537944114	Incidence	Global	Maternal sepsis and other maternal infections
20 to 24	Female	2044	1089.95164089288	391.987127679846	2442.12008881254	Incidence	Global	Maternal sepsis and other maternal infections
25 to 29	Female	1990	2411.37619715251	2409.32391612741	2413.42542653283	Incidence	Global	Maternal sepsis and other maternal infections
25 to 29	Female	1991	2332.44023024734	2330.4505916597	2334.42691319413	Incidence	Global	Maternal sepsis and other maternal infections
25 to 29	Female	1992	2259.77043607365	2257.8349136665	2261.70308820179	Incidence	Global	Maternal sepsis and other maternal infections
25 to 29	Female	1993	2198.31457713994	2196.42056681059	2200.20578582043	Incidence	Global	Maternal sepsis and other maternal infections
25 to 29	Female	1994	2149.66417984171	2147.80140989922	2151.52420116852	Incidence	Global	Maternal sepsis and other maternal infections
25 to 29	Female	1995	2115.50201008038	2113.66198775816	2117.33932174838	Incidence	Global	Maternal sepsis and other maternal infections
25 to 29	Female	1996	2089.4429164723	2087.62246565416	2091.26068745397	Incidence	Global	Maternal sepsis and other maternal infections
25 to 29	Female	1997	2066.18832084506	2064.38540977035	2067.98857965268	Incidence	Global	Maternal sepsis and other maternal infections
25 to 29	Female	1998	2044.99736821037	2043.21056266026	2046.78154672185	Incidence	Global	Maternal sepsis and other maternal infections
25 to 29	Female	1999	2026.40314390538	2024.63006635788	2028.17361622148	Incidence	Global	Maternal sepsis and other maternal infections
25 to 29	Female	2000	2011.54884748367	2009.78602030955	2013.30908626117	Incidence	Global	Maternal sepsis and other maternal infections
25 to 29	Female	2001	1998.55927587168	1996.80362242207	2000.31235418284	Incidence	Global	Maternal sepsis and other maternal infections
25 to 29	Female	2002	1985.33771714096	1983.58849261932	1987.08437931969	Incidence	Global	Maternal sepsis and other maternal infections
25 to 29	Female	2003	1972.68401637787	1970.94214333786	1974.42334031271	Incidence	Global	Maternal sepsis and other maternal infections
25 to 29	Female	2004	1960.22570164853	1958.4941905379	1961.95467923118	Incidence	Global	Maternal sepsis and other maternal infections
25 to 29	Female	2005	1949.38538614344	1947.66707917756	1951.10117653795	Incidence	Global	Maternal sepsis and other maternal infections
25 to 29	Female	2006	1937.26104318251	1935.55876036839	1938.96082943169	Incidence	Global	Maternal sepsis and other maternal infections
25 to 29	Female	2007	1920.66941370655	1918.98700432119	1922.34935224888	Incidence	Global	Maternal sepsis and other maternal infections
25 to 29	Female	2008	1901.57329892782	1899.91407375235	1903.2300831478	Incidence	Global	Maternal sepsis and other maternal infections
25 to 29	Female	2009	1882.77525750697	1881.1408087527	1884.40729638878	Incidence	Global	Maternal sepsis and other maternal infections
25 to 29	Female	2010	1867.31449963864	1865.70429449155	1868.92232377104	Incidence	Global	Maternal sepsis and other maternal infections
25 to 29	Female	2011	1860.41371634212	1858.82521319241	1861.9998606449	Incidence	Global	Maternal sepsis and other maternal infections
25 to 29	Female	2012	1863.38262956049	1861.81097845101	1864.95193478568	Incidence	Global	Maternal sepsis and other maternal infections
25 to 29	Female	2013	1871.39506812142	1869.8352825118	1872.95251410772	Incidence	Global	Maternal sepsis and other maternal infections
25 to 29	Female	2014	1877.30276998206	1875.75141493329	1878.85178991447	Incidence	Global	Maternal sepsis and other maternal infections
25 to 29	Female	2015	1872.60724176835	1871.06351318214	1874.14864444295	Incidence	Global	Maternal sepsis and other maternal infections
25 to 29	Female	2016	1853.21783200152	1851.68199690931	1854.75135802574	Incidence	Global	Maternal sepsis and other maternal infections
25 to 29	Female	2017	1824.48113382389	1822.95315690449	1826.00682335449	Incidence	Global	Maternal sepsis and other maternal infections
25 to 29	Female	2018	1792.61661125112	1791.09569794721	1794.13526002983	Incidence	Global	Maternal sepsis and other maternal infections
25 to 29	Female	2019	1763.33740935566	1761.82188175047	1764.85069279948	Incidence	Global	Maternal sepsis and other maternal infections
25 to 29	Female	2020	1732.23973081766	1730.73107720165	1733.74616321704	Incidence	Global	Maternal sepsis and other maternal infections
25 to 29	Female	2021	1730.12638186361	1728.61452263009	1731.63601842848	Incidence	Global	Maternal sepsis and other maternal infections
25 to 29	Female	2022	1608.77243573643	1469.10804314953	1757.60810685373	Incidence	Global	Maternal sepsis and other maternal infections
25 to 29	Female	2023	1560.93841478666	1416.21141688786	1715.82884187757	Incidence	Global	Maternal sepsis and other maternal infections
25 to 29	Female	2024	1512.40518536782	1359.24470119754	1677.34347761156	Incidence	Global	Maternal sepsis and other maternal infections
25 to 29	Female	2025	1464.2580941336	1299.6085105364	1643.07652404302	Incidence	Global	Maternal sepsis and other maternal infections
25 to 29	Female	2026	1417.12025642665	1238.47965012167	1613.25255638494	Incidence	Global	Maternal sepsis and other maternal infections
25 to 29	Female	2027	1371.20658930685	1176.75411250445	1587.53255467921	Incidence	Global	Maternal sepsis and other maternal infections
25 to 29	Female	2028	1326.51476913325	1115.22135924886	1565.17776118997	Incidence	Global	Maternal sepsis and other maternal infections
25 to 29	Female	2029	1283.25607290995	1054.49730030055	1546.06889559227	Incidence	Global	Maternal sepsis and other maternal infections
25 to 29	Female	2030	1241.6462191983	994.891337303948	1530.45831833864	Incidence	Global	Maternal sepsis and other maternal infections
25 to 29	Female	2031	1201.79008960926	936.460617637739	1518.70626889426	Incidence	Global	Maternal sepsis and other maternal infections
25 to 29	Female	2032	1163.62915580621	879.169726252704	1510.97258663357	Incidence	Global	Maternal sepsis and other maternal infections
25 to 29	Female	2033	1127.14365907341	823.29326593108	1507.08689299897	Incidence	Global	Maternal sepsis and other maternal infections
25 to 29	Female	2034	1092.31070626113	769.088942619311	1506.87142882787	Incidence	Global	Maternal sepsis and other maternal infections
25 to 29	Female	2035	1059.10482357399	716.778152243779	1510.16300654572	Incidence	Global	Maternal sepsis and other maternal infections
25 to 29	Female	2036	1027.49851652114	666.539020534147	1516.8222818681	Incidence	Global	Maternal sepsis and other maternal infections
25 to 29	Female	2037	997.462805436882	618.505807767104	1526.73700781917	Incidence	Global	Maternal sepsis and other maternal infections
25 to 29	Female	2038	968.967726936131	572.771505594251	1539.82249148178	Incidence	Global	Maternal sepsis and other maternal infections
25 to 29	Female	2039	941.982800586393	529.391943537828	1556.02077123084	Incidence	Global	Maternal sepsis and other maternal infections
25 to 29	Female	2040	916.477463634233	488.390484013896	1575.2992660236	Incidence	Global	Maternal sepsis and other maternal infections
25 to 29	Female	2041	892.421477147651	449.762779542726	1597.64928860857	Incidence	Global	Maternal sepsis and other maternal infections
25 to 29	Female	2042	869.785308685875	413.481302720115	1623.08463842023	Incidence	Global	Maternal sepsis and other maternal infections
25 to 29	Female	2043	848.540496417126	379.49950384959	1651.64038829198	Incidence	Global	Maternal sepsis and other maternal infections
25 to 29	Female	2044	828.659992746525	347.755535550008	1683.37190083262	Incidence	Global	Maternal sepsis and other maternal infections
30 to 34	Female	1990	1201.12561897683	1199.56747657245	1202.68195765793	Incidence	Global	Maternal sepsis and other maternal infections
30 to 34	Female	1991	1170.5441692702	1169.01674971972	1172.06982927352	Incidence	Global	Maternal sepsis and other maternal infections
30 to 34	Female	1992	1137.6203172829	1136.13103297828	1139.10789063098	Incidence	Global	Maternal sepsis and other maternal infections
30 to 34	Female	1993	1102.60962589062	1101.16644461564	1104.05114890496	Incidence	Global	Maternal sepsis and other maternal infections
30 to 34	Female	1994	1071.52703391897	1070.12902759908	1072.92342955324	Incidence	Global	Maternal sepsis and other maternal infections
30 to 34	Female	1995	1049.34774662362	1047.98710822139	1050.70680932359	Incidence	Global	Maternal sepsis and other maternal infections
30 to 34	Female	1996	1036.06744282582	1034.73447549398	1037.39885658287	Incidence	Global	Maternal sepsis and other maternal infections
30 to 34	Female	1997	1027.74106591141	1026.42875115865	1029.05184180099	Incidence	Global	Maternal sepsis and other maternal infections
30 to 34	Female	1998	1024.32510015536	1023.02521903115	1025.62344944497	Incidence	Global	Maternal sepsis and other maternal infections
30 to 34	Female	1999	1023.45898851442	1022.16696324123	1024.74948492283	Incidence	Global	Maternal sepsis and other maternal infections
30 to 34	Female	2000	1023.58877949022	1022.30264194346	1024.8733895313	Incidence	Global	Maternal sepsis and other maternal infections
30 to 34	Female	2001	1023.65440315597	1022.37464007763	1024.93264034459	Incidence	Global	Maternal sepsis and other maternal infections
30 to 34	Female	2002	1023.99836516276	1022.72427724183	1025.27092835848	Incidence	Global	Maternal sepsis and other maternal infections
30 to 34	Female	2003	1024.16	1022.89286195615	1025.42881745885	Incidence	Global	Maternal sepsis and other maternal infections
30 to 34	Female	2004	1024.50361857942	1023.23913983488	1025.76657477741	Incidence	Global	Maternal sepsis and other maternal infections
30 to 34	Female	2005	1026.25727767837	1024.99479710843	1027.51823432902	Incidence	Global	Maternal sepsis and other maternal infections
30 to 34	Female	2006	1028.85322582212	1027.59061930775	1030.11430548525	Incidence	Global	Maternal sepsis and other maternal infections
30 to 34	Female	2007	1031.37367204148	1030.11028707149	1032.63552712157	Incidence	Global	Maternal sepsis and other maternal infections
30 to 34	Female	2008	1034.25644766821	1032.99294330885	1035.51841891246	Incidence	Global	Maternal sepsis and other maternal infections
30 to 34	Female	2009	1037.69417794194	1036.43250457776	1038.95431499727	Incidence	Global	Maternal sepsis and other maternal infections
30 to 34	Female	2010	1042.91128579432	1041.65268343874	1044.16834719345	Incidence	Global	Maternal sepsis and other maternal infections
30 to 34	Female	2011	1052.55451778457	1051.29764424007	1053.8098407118	Incidence	Global	Maternal sepsis and other maternal infections
30 to 34	Female	2012	1065.31465517691	1064.0591450059	1066.56860197902	Incidence	Global	Maternal sepsis and other maternal infections
30 to 34	Female	2013	1077.47523176982	1076.2230942789	1078.72579491237	Incidence	Global	Maternal sepsis and other maternal infections
30 to 34	Female	2014	1085.88331411456	1084.63807602876	1087.12697242168	Incidence	Global	Maternal sepsis and other maternal infections
30 to 34	Female	2015	1087.55015622969	1086.3168688379	1088.78186740365	Incidence	Global	Maternal sepsis and other maternal infections
30 to 34	Female	2016	1081.90706340361	1080.69101770206	1083.12154592828	Incidence	Global	Maternal sepsis and other maternal infections
30 to 34	Female	2017	1072.53664971399	1071.3392750398	1073.73247850614	Incidence	Global	Maternal sepsis and other maternal infections
30 to 34	Female	2018	1062.21623258018	1061.03575656778	1063.39518011818	Incidence	Global	Maternal sepsis and other maternal infections
30 to 34	Female	2019	1053.42562000179	1052.2579441487	1054.59178147861	Incidence	Global	Maternal sepsis and other maternal infections
30 to 34	Female	2020	1042.33711477008	1041.17965909744	1043.49307102237	Incidence	Global	Maternal sepsis and other maternal infections
30 to 34	Female	2021	1049.82974404093	1048.66793696089	1050.99004283171	Incidence	Global	Maternal sepsis and other maternal infections
30 to 34	Female	2022	941.977048552946	860.593037688515	1028.71266684048	Incidence	Global	Maternal sepsis and other maternal infections
30 to 34	Female	2023	924.580174564696	839.23216660723	1015.91291476171	Incidence	Global	Maternal sepsis and other maternal infections
30 to 34	Female	2024	906.216957295779	814.743598942645	1004.7112093955	Incidence	Global	Maternal sepsis and other maternal infections
30 to 34	Female	2025	886.435377429891	786.902817292658	994.519820567847	Incidence	Global	Maternal sepsis and other maternal infections
30 to 34	Female	2026	864.841825589172	755.741218116166	984.606991835702	Incidence	Global	Maternal sepsis and other maternal infections
30 to 34	Female	2027	841.413394611454	721.750285007653	974.500185347817	Incidence	Global	Maternal sepsis and other maternal infections
30 to 34	Female	2028	816.93726087458	686.222423506273	964.498886481932	Incidence	Global	Maternal sepsis and other maternal infections
30 to 34	Female	2029	792.146957457726	650.232303725683	955.020583550208	Incidence	Global	Maternal sepsis and other maternal infections
30 to 34	Female	2030	767.601770277541	614.542193074251	946.450087017645	Incidence	Global	Maternal sepsis and other maternal infections
30 to 34	Female	2031	743.621784749965	579.604114011267	939.005358444142	Incidence	Global	Maternal sepsis and other maternal infections
30 to 34	Female	2032	720.314036833853	545.649104898845	932.685294754593	Incidence	Global	Maternal sepsis and other maternal infections
30 to 34	Female	2033	697.66984890049	512.837370042876	927.28520194068	Incidence	Global	Maternal sepsis and other maternal infections
30 to 34	Female	2034	675.794466815674	481.292182438535	922.897322713609	Incidence	Global	Maternal sepsis and other maternal infections
30 to 34	Female	2035	654.799252550145	451.044484877801	919.769674264212	Incidence	Global	Maternal sepsis and other maternal infections
30 to 34	Female	2036	634.738507567218	422.033889068852	918.17853348482	Incidence	Global	Maternal sepsis and other maternal infections
30 to 34	Female	2037	615.580914893077	394.158308079811	918.287002291336	Incidence	Global	Maternal sepsis and other maternal infections
30 to 34	Female	2038	597.314271192031	367.430755352165	920.122709996236	Incidence	Global	Maternal sepsis and other maternal infections
30 to 34	Female	2039	579.92520278163	341.869267111245	923.698066948117	Incidence	Global	Maternal sepsis and other maternal infections
30 to 34	Female	2040	563.399457480418	317.490470139081	929.018821336884	Incidence	Global	Maternal sepsis and other maternal infections
30 to 34	Female	2041	547.722183915523	294.305943546286	936.08946138332	Incidence	Global	Maternal sepsis and other maternal infections
30 to 34	Female	2042	532.878196381007	272.320351385365	944.916661564754	Incidence	Global	Maternal sepsis and other maternal infections
30 to 34	Female	2043	518.852224809179	251.530697288096	955.511530474018	Incidence	Global	Maternal sepsis and other maternal infections
30 to 34	Female	2044	505.62915025614	231.926290466274	967.891120384192	Incidence	Global	Maternal sepsis and other maternal infections
35 to 39	Female	1990	636.931955053959	635.744467967712	638.118564943069	Incidence	Global	Maternal sepsis and other maternal infections
35 to 39	Female	1991	615.154773923917	614.001682706963	616.307021914023	Incidence	Global	Maternal sepsis and other maternal infections
35 to 39	Female	1992	597.472732741584	596.347232383735	598.597417764619	Incidence	Global	Maternal sepsis and other maternal infections
35 to 39	Female	1993	586.084558358189	584.976960021476	587.191359301229	Incidence	Global	Maternal sepsis and other maternal infections
35 to 39	Female	1994	580.609361979224	579.511701660065	581.706232676149	Incidence	Global	Maternal sepsis and other maternal infections
35 to 39	Female	1995	580.08710373585	578.994662236348	581.178753555587	Incidence	Global	Maternal sepsis and other maternal infections
35 to 39	Female	1996	578.739262093721	577.655911106741	579.821818990698	Incidence	Global	Maternal sepsis and other maternal infections
35 to 39	Female	1997	571.651212840588	570.587	572.71484839515	Incidence	Global	Maternal sepsis and other maternal infections
35 to 39	Female	1998	559.288188320525	558.252434120824	560.323168021949	Incidence	Global	Maternal sepsis and other maternal infections
35 to 39	Female	1999	545.993651206683	544.988674893488	546.997867640215	Incidence	Global	Maternal sepsis and other maternal infections
35 to 39	Female	2000	534.961073639117	533.983312783199	535.938085851479	Incidence	Global	Maternal sepsis and other maternal infections
35 to 39	Female	2001	527.795121750722	526.837951463274	528.751549125386	Incidence	Global	Maternal sepsis and other maternal infections
35 to 39	Female	2002	523.870023614544	522.927650366088	524.811655244038	Incidence	Global	Maternal sepsis and other maternal infections
35 to 39	Female	2003	523.286189711399	522.351977779946	524.219657089356	Incidence	Global	Maternal sepsis and other maternal infections
35 to 39	Female	2004	524.381146965921	523.451529759555	525.310014720971	Incidence	Global	Maternal sepsis and other maternal infections
35 to 39	Female	2005	525.975117867448	525.048697463345	526.900783571562	Incidence	Global	Maternal sepsis and other maternal infections
35 to 39	Female	2006	526.918660805046	525.996312066729	527.840250751101	Incidence	Global	Maternal sepsis and other maternal infections
35 to 39	Female	2007	527.636044441526	526.717518276955	528.553808431943	Incidence	Global	Maternal sepsis and other maternal infections
35 to 39	Female	2008	528.41079354503	527.49572161096	529.325100028755	Incidence	Global	Maternal sepsis and other maternal infections
35 to 39	Female	2009	530.265703556546	529.352445399142	531.178191387008	Incidence	Global	Maternal sepsis and other maternal infections
35 to 39	Female	2010	534.353991023153	533.439441028968	535.267762333281	Incidence	Global	Maternal sepsis and other maternal infections
35 to 39	Female	2011	541.900077724267	540.979952054078	542.81941076445	Incidence	Global	Maternal sepsis and other maternal infections
35 to 39	Female	2012	551.767691261207	550.83957187893	552.69500025078	Incidence	Global	Maternal sepsis and other maternal infections
35 to 39	Female	2013	561.685508669018	560.750000485895	562.620188583172	Incidence	Global	Maternal sepsis and other maternal infections
35 to 39	Female	2014	569.388364031935	568.449010364936	570.326875083465	Incidence	Global	Maternal sepsis and other maternal infections
35 to 39	Female	2015	573.36149794394	572.423351663141	574.298793311742	Incidence	Global	Maternal sepsis and other maternal infections
35 to 39	Female	2016	573.332904584744	572.400351438074	574.264605224229	Incidence	Global	Maternal sepsis and other maternal infections
35 to 39	Female	2017	570.35729289784	569.433677984617	571.280058567431	Incidence	Global	Maternal sepsis and other maternal infections
35 to 39	Female	2018	565.510362385874	564.598245023098	566.421636724672	Incidence	Global	Maternal sepsis and other maternal infections
35 to 39	Female	2019	560.108281009878	559.208958463448	561.00676751381	Incidence	Global	Maternal sepsis and other maternal infections
35 to 39	Female	2020	553.44115476864	552.55636061169	554.325121868301	Incidence	Global	Maternal sepsis and other maternal infections
35 to 39	Female	2021	548.667843044017	547.796820303225	549.538044397204	Incidence	Global	Maternal sepsis and other maternal infections
35 to 39	Female	2022	521.191563919417	476.265603836078	569.079857306525	Incidence	Global	Maternal sepsis and other maternal infections
35 to 39	Female	2023	514.338202130089	466.981075921613	565.028	Incidence	Global	Maternal sepsis and other maternal infections
35 to 39	Female	2024	507.394744352816	456.320019350387	562.405976529113	Incidence	Global	Maternal sepsis and other maternal infections
35 to 39	Female	2025	500.217896676161	444.211304864341	561.061987507723	Incidence	Global	Maternal sepsis and other maternal infections
35 to 39	Female	2026	492.582856402734	430.611591830031	560.650265229467	Incidence	Global	Maternal sepsis and other maternal infections
35 to 39	Female	2027	484.329372614122	415.611148156037	560.809833967631	Incidence	Global	Maternal sepsis and other maternal infections
35 to 39	Female	2028	475.701025168287	399.719754595336	561.539568762009	Incidence	Global	Maternal sepsis and other maternal infections
35 to 39	Female	2029	466.614195528694	383.098297689421	562.531198902199	Incidence	Global	Maternal sepsis and other maternal infections
35 to 39	Female	2030	456.831547573955	365.733887082641	563.336131490368	Incidence	Global	Maternal sepsis and other maternal infections
35 to 39	Female	2031	446.145408007248	347.625386008884	563.546199992593	Incidence	Global	Maternal sepsis and other maternal infections
35 to 39	Female	2032	434.537994822486	328.928690428429	562.963866633316	Incidence	Global	Maternal sepsis and other maternal infections
35 to 39	Female	2033	422.408134234955	310.13715442234	561.871853567309	Incidence	Global	Maternal sepsis and other maternal infections
35 to 39	Female	2034	410.128793300997	291.642711590263	560.615717416348	Incidence	Global	Maternal sepsis and other maternal infections
35 to 39	Female	2035	397.985907545295	273.709045444714	559.507398445249	Incidence	Global	Maternal sepsis and other maternal infections
35 to 39	Female	2036	386.142875354487	256.471923042577	558.746362526307	Incidence	Global	Maternal sepsis and other maternal infections
35 to 39	Female	2037	374.653240491178	239.978740265514	558.39142293725	Incidence	Global	Maternal sepsis and other maternal infections
35 to 39	Female	2038	363.509614311667	224.252520795904	558.373236874675	Incidence	Global	Maternal sepsis and other maternal infections
35 to 39	Female	2039	352.764945787804	209.315109455237	558.771748815295	Incidence	Global	Maternal sepsis and other maternal infections
35 to 39	Female	2040	342.476707932466	195.157930927152	559.741222345936	Incidence	Global	Maternal sepsis and other maternal infections
35 to 39	Female	2041	332.673705576318	181.737573008219	561.443703633763	Incidence	Global	Maternal sepsis and other maternal infections
35 to 39	Female	2042	323.34033660081	168.991919830622	563.976837067017	Incidence	Global	Maternal sepsis and other maternal infections
35 to 39	Female	2043	314.470311057157	156.901374219228	567.381061910257	Incidence	Global	Maternal sepsis and other maternal infections
35 to 39	Female	2044	306.056987587642	145.449845113403	571.689553075429	Incidence	Global	Maternal sepsis and other maternal infections
40 to 44	Female	1990	314.346724929341	313.419579770096	315.273928761376	Incidence	Global	Maternal sepsis and other maternal infections
40 to 44	Female	1991	300.385455578132	299.500922494505	301.270041573896	Incidence	Global	Maternal sepsis and other maternal infections
40 to 44	Female	1992	289.756520871495	288.902457054648	290.610637753838	Incidence	Global	Maternal sepsis and other maternal infections
40 to 44	Female	1993	279.330297379412	278.506887526304	280.15375864844	Incidence	Global	Maternal sepsis and other maternal infections
40 to 44	Female	1994	272.191625898978	271.390295411744	272.99300431512	Incidence	Global	Maternal sepsis and other maternal infections
40 to 44	Female	1995	265.171860734187	264.395517594398	265.948241011136	Incidence	Global	Maternal sepsis and other maternal infections
40 to 44	Female	1996	259.991342748247	259.230912141232	260.751808179541	Incidence	Global	Maternal sepsis and other maternal infections
40 to 44	Female	1997	256.206092314816	255.457805535769	256.95441109595	Incidence	Global	Maternal sepsis and other maternal infections
40 to 44	Female	1998	254.191300487234	253.450322218051	254.932307452603	Incidence	Global	Maternal sepsis and other maternal infections
40 to 44	Female	1999	253.430829985632	252.694027412586	254.167656981887	Incidence	Global	Maternal sepsis and other maternal infections
40 to 44	Female	2000	253.242317964077	252.509089182027	253.975564686685	Incidence	Global	Maternal sepsis and other maternal infections
40 to 44	Female	2001	252.086572999004	251.360557226924	252.812598377962	Incidence	Global	Maternal sepsis and other maternal infections
40 to 44	Female	2002	248.925039840703	248.212189503126	249.637891026281	Incidence	Global	Maternal sepsis and other maternal infections
40 to 44	Female	2003	243.791534328702	243.097933344036	244.485126516594	Incidence	Global	Maternal sepsis and other maternal infections
40 to 44	Female	2004	238.264986733883	237.592054352412	238.937900180039	Incidence	Global	Maternal sepsis and other maternal infections
40 to 44	Female	2005	233.469727603108	232.815429428054	234.123996755035	Incidence	Global	Maternal sepsis and other maternal infections
40 to 44	Female	2006	229.860237884205	229.220767473669	230.499670197803	Incidence	Global	Maternal sepsis and other maternal infections
40 to 44	Female	2007	227.251153600878	226.623192146769	227.879068929394	Incidence	Global	Maternal sepsis and other maternal infections
40 to 44	Female	2008	226.081117032665	225.460202284958	226.701978414999	Incidence	Global	Maternal sepsis and other maternal infections
40 to 44	Female	2009	226.024467605841	225.407613951249	226.64126035004	Incidence	Global	Maternal sepsis and other maternal infections
40 to 44	Female	2010	226.930105919038	226.31524721171	227.544894950753	Incidence	Global	Maternal sepsis and other maternal infections
40 to 44	Female	2011	228.498184407457	227.884565494157	229.111722882208	Incidence	Global	Maternal sepsis and other maternal infections
40 to 44	Female	2012	230.594075008547	229.980684087926	231.207	Incidence	Global	Maternal sepsis and other maternal infections
40 to 44	Female	2013	232.783281135794	232.169756387802	233.396702865175	Incidence	Global	Maternal sepsis and other maternal infections
40 to 44	Female	2014	234.853812767364	234.24	235.467719067735	Incidence	Global	Maternal sepsis and other maternal infections
40 to 44	Female	2015	236.661926263384	236.04700851095	237.276723801707	Incidence	Global	Maternal sepsis and other maternal infections
40 to 44	Female	2016	237.914948096227	237.298998280782	238.530773223619	Incidence	Global	Maternal sepsis and other maternal infections
40 to 44	Female	2017	238.47938720126	237.862967006711	239.095680687498	Incidence	Global	Maternal sepsis and other maternal infections
40 to 44	Female	2018	238.536233681333	237.920385286575	239.151954082401	Incidence	Global	Maternal sepsis and other maternal infections
40 to 44	Female	2019	238.311262077263	237.697463992889	238.924929772328	Incidence	Global	Maternal sepsis and other maternal infections
40 to 44	Female	2020	237.731562417184	237.121542130222	238.341448763682	Incidence	Global	Maternal sepsis and other maternal infections
40 to 44	Female	2021	236.391162294013	235.78654826099	236.995639828712	Incidence	Global	Maternal sepsis and other maternal infections
40 to 44	Female	2022	236.027944216169	215.689153386188	257.688363353759	Incidence	Global	Maternal sepsis and other maternal infections
40 to 44	Female	2023	234.565474161642	212.977222266549	257.655973792674	Incidence	Global	Maternal sepsis and other maternal infections
40 to 44	Female	2024	232.661187305274	209.251830062013	257.861253651835	Incidence	Global	Maternal sepsis and other maternal infections
40 to 44	Female	2025	230.37970646184	204.597532794621	258.378230229544	Incidence	Global	Maternal sepsis and other maternal infections
40 to 44	Female	2026	227.803571435728	199.158796481841	259.257888874137	Incidence	Global	Maternal sepsis and other maternal infections
40 to 44	Female	2027	225.03718148721	193.126445754378	260.545900785997	Incidence	Global	Maternal sepsis and other maternal infections
40 to 44	Female	2028	222.225911242463	186.754009288657	262.297012949655	Incidence	Global	Maternal sepsis and other maternal infections
40 to 44	Female	2029	219.395718487305	180.157230230601	264.465108813786	Incidence	Global	Maternal sepsis and other maternal infections
40 to 44	Female	2030	216.48346235607	173.35	266.925934554631	Incidence	Global	Maternal sepsis and other maternal infections
40 to 44	Female	2031	213.390807079939	166.309396024984	269.52092061149	Incidence	Global	Maternal sepsis and other maternal infections
40 to 44	Female	2032	210.046874803537	159.037457250593	272.113244917806	Incidence	Global	Maternal sepsis and other maternal infections
40 to 44	Female	2033	206.554963583231	151.686670474582	274.755965289084	Incidence	Global	Maternal sepsis and other maternal infections
40 to 44	Female	2034	202.876627850704	144.278678427181	277.345046126605	Incidence	Global	Maternal sepsis and other maternal infections
40 to 44	Female	2035	198.906903368039	136.77917370853	279.69335121826	Incidence	Global	Maternal sepsis and other maternal infections
40 to 44	Female	2036	194.55299789989	129.16529475099	281.621094846744	Incidence	Global	Maternal sepsis and other maternal infections
40 to 44	Female	2037	189.804142373729	121.477	283.045963671078	Incidence	Global	Maternal sepsis and other maternal infections
40 to 44	Female	2038	184.830863839334	113.879799331838	284.127312858746	Incidence	Global	Maternal sepsis and other maternal infections
40 to 44	Female	2039	179.793665104895	106.50293315327	285.051578824491	Incidence	Global	Maternal sepsis and other maternal infections
40 to 44	Female	2040	174.816217076374	99.4302733227934	285.986413188641	Incidence	Global	Maternal sepsis and other maternal infections
40 to 44	Female	2041	169.969413719068	92.699837636589	287.041852653252	Incidence	Global	Maternal sepsis and other maternal infections
40 to 44	Female	2042	165.276275230382	86.3182775187769	288.256395716867	Incidence	Global	Maternal sepsis and other maternal infections
40 to 44	Female	2043	160.732645483495	80.2837844269766	289.603952241661	Incidence	Global	Maternal sepsis and other maternal infections
40 to 44	Female	2044	156.361478314574	74.5967709009656	291.128671152647	Incidence	Global	Maternal sepsis and other maternal infections
45 to 49	Female	1990	133.145348260741	132.47644738117	133.815321429884	Incidence	Global	Maternal sepsis and other maternal infections
45 to 49	Female	1991	128.234759548585	127.582993976223	128.887598660302	Incidence	Global	Maternal sepsis and other maternal infections
45 to 49	Female	1992	120.944756047194	120.322613693381	121.56795178217	Incidence	Global	Maternal sepsis and other maternal infections
45 to 49	Female	1993	113.941111473292	113.348139532555	114.535114108156	Incidence	Global	Maternal sepsis and other maternal infections
45 to 49	Female	1994	106.350322014531	105.791229686931	106.910407677689	Incidence	Global	Maternal sepsis and other maternal infections
45 to 49	Female	1995	101.406073219686	100.870766106355	101.942340347801	Incidence	Global	Maternal sepsis and other maternal infections
45 to 49	Female	1996	97.7870515309571	97.2737892874932	98.3012232388972	Incidence	Global	Maternal sepsis and other maternal infections
45 to 49	Female	1997	95.2103741778671	94.7122209628985	95.7094044830484	Incidence	Global	Maternal sepsis and other maternal infections
45 to 49	Female	1998	92.4052343467723	91.9231857815463	92.8881263121525	Incidence	Global	Maternal sepsis and other maternal infections
45 to 49	Female	1999	90.3520321684859	89.8820140181697	90.8228678611473	Incidence	Global	Maternal sepsis and other maternal infections
45 to 49	Female	2000	87.5897780998295	87.1356291901607	88.0447110113013	Incidence	Global	Maternal sepsis and other maternal infections
45 to 49	Female	2001	85.5470591503136	85.1033507082271	85.9915340901209	Incidence	Global	Maternal sepsis and other maternal infections
45 to 49	Female	2002	84.3057729685622	83.8694590133673	84.7428370282557	Incidence	Global	Maternal sepsis and other maternal infections
45 to 49	Female	2003	83.7502289688145	83.3182637153883	84.1829313791857	Incidence	Global	Maternal sepsis and other maternal infections
45 to 49	Female	2004	83.4838600179251	83.0547495100078	83.9136973506144	Incidence	Global	Maternal sepsis and other maternal infections
45 to 49	Female	2005	83.1052935619391	82.6794258841722	83.5318777640084	Incidence	Global	Maternal sepsis and other maternal infections
45 to 49	Female	2006	82.1293	81.7094993647942	82.5498764944145	Incidence	Global	Maternal sepsis and other maternal infections
45 to 49	Female	2007	80.4487440671529	80.0384877445968	80.8596827612239	Incidence	Global	Maternal sepsis and other maternal infections
45 to 49	Female	2008	78.2710339460473	77.8734974739706	78.6692251060433	Incidence	Global	Maternal sepsis and other maternal infections
45 to 49	Female	2009	76.1059394498902	75.7215325014278	76.4909709762706	Incidence	Global	Maternal sepsis and other maternal infections
45 to 49	Female	2010	74.2991054724974	73.9262612376479	74.6725459734224	Incidence	Global	Maternal sepsis and other maternal infections
45 to 49	Female	2011	72.9274707364547	72.5637767929414	73.2917375391388	Incidence	Global	Maternal sepsis and other maternal infections
45 to 49	Female	2012	71.7268814173144	71.3707858275702	72.0835315412984	Incidence	Global	Maternal sepsis and other maternal infections
45 to 49	Female	2013	70.7712188021324	70.4206512921991	71.122328928234	Incidence	Global	Maternal sepsis and other maternal infections
45 to 49	Female	2014	69.9706457707736	69.6243387191061	70.3174873153051	Incidence	Global	Maternal sepsis and other maternal infections
45 to 49	Female	2015	69.2582217786837	68.9155244352948	69.6014472980099	Incidence	Global	Maternal sepsis and other maternal infections
45 to 49	Female	2016	68.4738768456057	68.1350595839044	68.8132159008184	Incidence	Global	Maternal sepsis and other maternal infections
45 to 49	Female	2017	67.7313446497118	67.3960864457081	68.067119269872	Incidence	Global	Maternal sepsis and other maternal infections
45 to 49	Female	2018	67.0310628706279	66.6990882949045	67.3635492040667	Incidence	Global	Maternal sepsis and other maternal infections
45 to 49	Female	2019	66.4137232415621	66.0845119719302	66.7434428357436	Incidence	Global	Maternal sepsis and other maternal infections
45 to 49	Female	2020	65.9498016950528	65.6225114908482	66.2775984272869	Incidence	Global	Maternal sepsis and other maternal infections
45 to 49	Female	2021	65.2604681061223	64.9351352655221	65.5863096017647	Incidence	Global	Maternal sepsis and other maternal infections
45 to 49	Female	2022	75.3438532764846	68.850469517502	82.2633346089532	Incidence	Global	Maternal sepsis and other maternal infections
45 to 49	Female	2023	75.6967488568571	68.7285969008629	83.1523866175254	Incidence	Global	Maternal sepsis and other maternal infections
45 to 49	Female	2024	75.9133519778276	68.2733842801207	84.1408740175209	Incidence	Global	Maternal sepsis and other maternal infections
45 to 49	Female	2025	75.9690529184411	67.4651640277317	85.2085094255919	Incidence	Global	Maternal sepsis and other maternal infections
45 to 49	Female	2026	75.8596893365221	66.3187300544105	86.3419021948534	Incidence	Global	Maternal sepsis and other maternal infections
45 to 49	Female	2027	75.5911088326393	64.8699528933654	87.5264569168436	Incidence	Global	Maternal sepsis and other maternal infections
45 to 49	Female	2028	75.1727739887157	63.1713635213441	88.7350578921675	Incidence	Global	Maternal sepsis and other maternal infections
45 to 49	Female	2029	74.6202697569033	61.2723933207461	89.9559156338953	Incidence	Global	Maternal sepsis and other maternal infections
45 to 49	Female	2030	73.9537960086321	59.2172660417152	91.1916569145248	Incidence	Global	Maternal sepsis and other maternal infections
45 to 49	Female	2031	73.1994327892254	57.0485	92.4588009384117	Incidence	Global	Maternal sepsis and other maternal infections
45 to 49	Female	2032	72.3903141041073	54.8113022533348	93.7848994280072	Incidence	Global	Maternal sepsis and other maternal infections
45 to 49	Female	2033	71.5726148242712	52.5632130611854	95.2081195165404	Incidence	Global	Maternal sepsis and other maternal infections
45 to 49	Female	2034	70.7542737866494	50.3232008297607	96.728785097755	Incidence	Global	Maternal sepsis and other maternal infections
45 to 49	Female	2035	69.9147532931915	48.0848614781492	98.3147708845893	Incidence	Global	Maternal sepsis and other maternal infections
45 to 49	Female	2036	69.0220143929835	45.8336343146456	99.9173999628496	Incidence	Global	Maternal sepsis and other maternal infections
45 to 49	Female	2037	68.0526496385068	43.5641724166584	101.493341084074	Incidence	Global	Maternal sepsis and other maternal infections
45 to 49	Female	2038	67.0393276065525	41.3126075521136	103.069520650941	Incidence	Global	Maternal sepsis and other maternal infections
45 to 49	Female	2039	65.9689321403175	39.0805951410773	104.611407732669	Incidence	Global	Maternal sepsis and other maternal infections
45 to 49	Female	2040	64.8066454838876	36.8557755366802	106.050450069675	Incidence	Global	Maternal sepsis and other maternal infections
45 to 49	Female	2041	63.521358360038	34.6297173157922	107.318691361156	Incidence	Global	Maternal sepsis and other maternal infections
45 to 49	Female	2042	62.1084277947486	32.4112190761187	108.38424679872	Incidence	Global	Maternal sepsis and other maternal infections
45 to 49	Female	2043	60.6223122043429	30.2421100170489	109.308723426256	Incidence	Global	Maternal sepsis and other maternal infections
45 to 49	Female	2044	59.1147213588111	28.154641203374	110.164067780473	Incidence	Global	Maternal sepsis and other maternal infections
15 to 19	Female	1990	682.14924750336	681.136524748022	683.160938194362	Incidence	Global	Maternal hemorrhage
15 to 19	Female	1991	673.746571920604	672.739612778954	674.752512274535	Incidence	Global	Maternal hemorrhage
15 to 19	Female	1992	666.800181853809	665.797718498499	667.801637498416	Incidence	Global	Maternal hemorrhage
15 to 19	Female	1993	660.890748678618	659.892824501158	661.887674547191	Incidence	Global	Maternal hemorrhage
15 to 19	Female	1994	655.417518615937	654.425529658575	656.408517798887	Incidence	Global	Maternal hemorrhage
15 to 19	Female	1995	650.716246655381	649.731654505729	651.699856091051	Incidence	Global	Maternal hemorrhage
15 to 19	Female	1996	646.057574681445	645.081841113445	647.032332353093	Incidence	Global	Maternal hemorrhage
15 to 19	Female	1997	640.095255038216	639.130441016444	641.05910194567	Incidence	Global	Maternal hemorrhage
15 to 19	Female	1998	632.820718519298	631.868868957157	633.771611731945	Incidence	Global	Maternal hemorrhage
15 to 19	Female	1999	624.537039863537	623.599785246718	625.473350418429	Incidence	Global	Maternal hemorrhage
15 to 19	Female	2000	615.683200566197	614.761745345454	616.603724853815	Incidence	Global	Maternal hemorrhage
15 to 19	Female	2001	605.156483444489	604.252929704241	606.059121959874	Incidence	Global	Maternal hemorrhage
15 to 19	Female	2002	593.379484855292	592.49449873179	594.263573466892	Incidence	Global	Maternal hemorrhage
15 to 19	Female	2003	582.263544411467	581.395229849359	583.130978258643	Incidence	Global	Maternal hemorrhage
15 to 19	Female	2004	573.054516715001	572.199385491987	573.908781197484	Incidence	Global	Maternal hemorrhage
15 to 19	Female	2005	566.661736659253	565.815226332577	567.507390000469	Incidence	Global	Maternal hemorrhage
15 to 19	Female	2006	563.123338628992	562.280504088172	563.965321698027	Incidence	Global	Maternal hemorrhage
15 to 19	Female	2007	560.887032310411	560.044826884678	561.728389931895	Incidence	Global	Maternal hemorrhage
15 to 19	Female	2008	559.118666975954	558.275399815955	559.961089422486	Incidence	Global	Maternal hemorrhage
15 to 19	Female	2009	556.986064245567	556.141284166802	557.830003411664	Incidence	Global	Maternal hemorrhage
15 to 19	Female	2010	553.812922695661	552.967158991274	554.657851063341	Incidence	Global	Maternal hemorrhage
15 to 19	Female	2011	547.147541703623	546.304279280248	547.989980012152	Incidence	Global	Maternal hemorrhage
15 to 19	Female	2012	536.178666716753	535.342341996253	537.014185591236	Incidence	Global	Maternal hemorrhage
15 to 19	Female	2013	522.680073978789	521.853436270664	523.50592845542	Incidence	Global	Maternal hemorrhage
15 to 19	Female	2014	508.399442206688	507.583712285467	509.214413071081	Incidence	Global	Maternal hemorrhage
15 to 19	Female	2015	494.935538479496	494.130762840501	495.73957804706	Incidence	Global	Maternal hemorrhage
15 to 19	Female	2016	481.360910803341	480.567713896843	482.153395004771	Incidence	Global	Maternal hemorrhage
15 to 19	Female	2017	466.214177833618	465.434523081172	466.993146151726	Incidence	Global	Maternal hemorrhage
15 to 19	Female	2018	450.672538390503	449.907659634555	451.436757779311	Incidence	Global	Maternal hemorrhage
15 to 19	Female	2019	435.98257259279	435.232700091315	436.731811273794	Incidence	Global	Maternal hemorrhage
15 to 19	Female	2020	421.63425812738	420.899925851945	422.367981473444	Incidence	Global	Maternal hemorrhage
15 to 19	Female	2021	411.576399112065	410.854833716225	412.297372320614	Incidence	Global	Maternal hemorrhage
15 to 19	Female	2022	401.444340893047	357.337920112501	449.293706939578	Incidence	Global	Maternal hemorrhage
15 to 19	Female	2023	390.232985421357	341.579744486418	443.562836869389	Incidence	Global	Maternal hemorrhage
15 to 19	Female	2024	379.433190923324	324.869656101222	440.097373553992	Incidence	Global	Maternal hemorrhage
15 to 19	Female	2025	369.048293538392	307.600024427809	438.601762712596	Incidence	Global	Maternal hemorrhage
15 to 19	Female	2026	359.080183804837	290.129050638499	438.795091201818	Incidence	Global	Maternal hemorrhage
15 to 19	Female	2027	349.529497907364	272.74075130821	440.454139065532	Incidence	Global	Maternal hemorrhage
15 to 19	Female	2028	340.395810221379	255.646507240799	443.415916834326	Incidence	Global	Maternal hemorrhage
15 to 19	Female	2029	331.677811270462	238.999011596538	447.566924622573	Incidence	Global	Maternal hemorrhage
15 to 19	Female	2030	323.373473773914	222.906463874967	452.831212445536	Incidence	Global	Maternal hemorrhage
15 to 19	Female	2031	315.480207876324	207.443826422963	459.160790716578	Incidence	Global	Maternal hemorrhage
15 to 19	Female	2032	307.995009073657	192.661104413998	466.528712644107	Incidence	Global	Maternal hemorrhage
15 to 19	Female	2033	300.914601608597	178.589336706461	474.924291689052	Incidence	Global	Maternal hemorrhage
15 to 19	Female	2034	294.235575864159	165.24496750233	484.349849604232	Incidence	Global	Maternal hemorrhage
15 to 19	Female	2035	287.954520567684	152.633095645966	494.818522321795	Incidence	Global	Maternal hemorrhage
15 to 19	Female	2036	282.068150857836	140.749945749019	506.352794318807	Incidence	Global	Maternal hemorrhage
15 to 19	Female	2037	276.573433256486	129.584789972954	518.983537378598	Incidence	Global	Maternal hemorrhage
15 to 19	Female	2038	271.467708545776	119.121472221091	532.749410151268	Incidence	Global	Maternal hemorrhage
15 to 19	Female	2039	266.748813727088	109.339637152342	547.696520179528	Incidence	Global	Maternal hemorrhage
15 to 19	Female	2040	262.415204440073	100.215734076718	563.878283291127	Incidence	Global	Maternal hemorrhage
15 to 19	Female	2041	258.466079351282	91.7238447423682	581.355437598609	Incidence	Global	Maternal hemorrhage
15 to 19	Female	2042	254.901508085768	83.8363702083294	600.196183774237	Incidence	Global	Maternal hemorrhage
15 to 19	Female	2043	251.722564711324	76.5246026697618	620.47643283985	Incidence	Global	Maternal hemorrhage
15 to 19	Female	2044	248.931468839163	69.7592018370434	642.280149712934	Incidence	Global	Maternal hemorrhage
20 to 24	Female	1990	1788.90865184004	1787.23031032223	1790.5846056884	Incidence	Global	Maternal hemorrhage
20 to 24	Female	1991	1737.62181840069	1735.97461533155	1739.26668998082	Incidence	Global	Maternal hemorrhage
20 to 24	Female	1992	1692.61031123165	1690.98999388433	1694.22834629358	Incidence	Global	Maternal hemorrhage
20 to 24	Female	1993	1653.18240535663	1651.58552781075	1654.77704382921	Incidence	Global	Maternal hemorrhage
20 to 24	Female	1994	1620.24405177563	1618.66624739069	1621.81965298573	Incidence	Global	Maternal hemorrhage
20 to 24	Female	1995	1595.18467339606	1593.62095756774	1596.74621317834	Incidence	Global	Maternal hemorrhage
20 to 24	Female	1996	1579.03555936144	1577.48031939027	1580.58864042293	Incidence	Global	Maternal hemorrhage
20 to 24	Female	1997	1569.27017126769	1567.7198321616	1570.81836170094	Incidence	Global	Maternal hemorrhage
20 to 24	Female	1998	1563.08506570725	1561.53907756557	1564.62891248491	Incidence	Global	Maternal hemorrhage
20 to 24	Female	1999	1556.8010102345	1555.26216932587	1558.33771899394	Incidence	Global	Maternal hemorrhage
20 to 24	Female	2000	1546.61799927326	1545.09124025847	1548.14264140473	Incidence	Global	Maternal hemorrhage
20 to 24	Female	2001	1528.94588318564	1527.43683321082	1530.45284063321	Incidence	Global	Maternal hemorrhage
20 to 24	Female	2002	1504.97826259526	1503.49168650695	1506.46277817485	Incidence	Global	Maternal hemorrhage
20 to 24	Female	2003	1477.78865039061	1476.32789346899	1479.24738334231	Incidence	Global	Maternal hemorrhage
20 to 24	Female	2004	1450.30907799102	1448.87583185361	1451.74033801726	Incidence	Global	Maternal hemorrhage
20 to 24	Female	2005	1426.00166032719	1424.5957650331	1427.40560498629	Incidence	Global	Maternal hemorrhage
20 to 24	Female	2006	1403.48747067452	1402.1094204013	1404.86360485104	Incidence	Global	Maternal hemorrhage
20 to 24	Female	2007	1380.69644767708	1379.34581832228	1382.04519541962	Incidence	Global	Maternal hemorrhage
20 to 24	Female	2008	1359.24248704438	1357.91642336119	1360.56670076005	Incidence	Global	Maternal hemorrhage
20 to 24	Female	2009	1340.30146128272	1338.99535005596	1341.60574931577	Incidence	Global	Maternal hemorrhage
20 to 24	Female	2010	1324.85787045981	1323.56533834295	1326.1485993972	Incidence	Global	Maternal hemorrhage
20 to 24	Female	2011	1312.04061649824	1310.75524380186	1313.32419986925	Incidence	Global	Maternal hemorrhage
20 to 24	Female	2012	1299.3747883056	1298.09313443611	1300.65466435461	Incidence	Global	Maternal hemorrhage
20 to 24	Female	2013	1286.58734147902	1285.30736474548	1287.86555075028	Incidence	Global	Maternal hemorrhage
20 to 24	Female	2014	1273.09461865767	1271.81566527317	1274.37181519059	Incidence	Global	Maternal hemorrhage
20 to 24	Female	2015	1258.43599538937	1257.15879958097	1259.71144647876	Incidence	Global	Maternal hemorrhage
20 to 24	Female	2016	1238.15050272493	1236.87970727565	1239.41957295059	Incidence	Global	Maternal hemorrhage
20 to 24	Female	2017	1210.97419223899	1209.71521480628	1212.23147283065	Incidence	Global	Maternal hemorrhage
20 to 24	Female	2018	1181.12261419679	1179.8781324118	1182.36543154333	Incidence	Global	Maternal hemorrhage
20 to 24	Female	2019	1152.44381842502	1151.21425155791	1153.67175285742	Incidence	Global	Maternal hemorrhage
20 to 24	Female	2020	1122.28236758735	1121.06958640034	1123.4935509085	Incidence	Global	Maternal hemorrhage
20 to 24	Female	2021	1097.01153901765	1095.81346779232	1098.20804192084	Incidence	Global	Maternal hemorrhage
20 to 24	Female	2022	1092.02593741194	988.510215799601	1203.0929105152	Incidence	Global	Maternal hemorrhage
20 to 24	Female	2023	1061.70269499463	954.949526454499	1176.65900614857	Incidence	Global	Maternal hemorrhage
20 to 24	Female	2024	1031.98668294276	919.323334612458	1153.98487174083	Incidence	Global	Maternal hemorrhage
20 to 24	Female	2025	1003.08068572363	881.594964452943	1135.7208786764	Incidence	Global	Maternal hemorrhage
20 to 24	Female	2026	975.147363490965	841.853862391883	1122.36255017773	Incidence	Global	Maternal hemorrhage
20 to 24	Female	2027	948.236203407177	800.386051278057	1114.00050426404	Incidence	Global	Maternal hemorrhage
20 to 24	Female	2028	922.355877837533	757.907	1110.14026401929	Incidence	Global	Maternal hemorrhage
20 to 24	Female	2029	897.511488741069	715.106531719201	1110.27485156593	Incidence	Global	Maternal hemorrhage
20 to 24	Female	2030	873.705029573843	672.56564520049	1113.97338688006	Incidence	Global	Maternal hemorrhage
20 to 24	Female	2031	850.935853162468	630.741672494871	1120.90170047656	Incidence	Global	Maternal hemorrhage
20 to 24	Female	2032	829.201097228154	589.981424023331	1130.8147001607	Incidence	Global	Maternal hemorrhage
20 to 24	Female	2033	808.496088849373	550.540843933383	1143.54106162311	Incidence	Global	Maternal hemorrhage
20 to 24	Female	2034	788.814732457073	512.604	1158.96837106655	Incidence	Global	Maternal hemorrhage
20 to 24	Female	2035	770.14988182348	476.296312327649	1177.03108217642	Incidence	Global	Maternal hemorrhage
20 to 24	Female	2036	752.493697345345	441.700847452956	1197.70145157772	Incidence	Global	Maternal hemorrhage
20 to 24	Female	2037	735.837989714035	408.863512467609	1220.98296016364	Incidence	Global	Maternal hemorrhage
20 to 24	Female	2038	720.174551506432	377.80250284897	1246.90564305932	Incidence	Global	Maternal hemorrhage
20 to 24	Female	2039	705.49547863982	348.513673072684	1275.52284042406	Incidence	Global	Maternal hemorrhage
20 to 24	Female	2040	691.793483999708	320.975162738817	1306.90899955489	Incidence	Global	Maternal hemorrhage
20 to 24	Female	2041	679.062205897953	295.151138091218	1341.15826130425	Incidence	Global	Maternal hemorrhage
20 to 24	Female	2042	667.296514367178	270.994851610701	1378.38364214022	Incidence	Global	Maternal hemorrhage
20 to 24	Female	2043	656.49281866727	248.451166418166	1418.7166800355	Incidence	Global	Maternal hemorrhage
20 to 24	Female	2044	646.649379771931	227.458652947365	1462.3074527656	Incidence	Global	Maternal hemorrhage
25 to 29	Female	1990	1765.87186027774	1764.11572698743	1767.62556817985	Incidence	Global	Maternal hemorrhage
25 to 29	Female	1991	1710.05447040366	1708.35094918724	1711.75564102343	Incidence	Global	Maternal hemorrhage
25 to 29	Female	1992	1658.32275816032	1656.6647980768	1659.9784349191	Incidence	Global	Maternal hemorrhage
25 to 29	Female	1993	1615.41615562989	1613.79265298748	1617.03742865838	Incidence	Global	Maternal hemorrhage
25 to 29	Female	1994	1582.66805623447	1581.06981521338	1584.2641080312	Incidence	Global	Maternal hemorrhage
25 to 29	Female	1995	1561.79546226811	1560.21457019075	1563.37419166692	Incidence	Global	Maternal hemorrhage
25 to 29	Female	1996	1549.04064584477	1547.47328442466	1550.60586262975	Incidence	Global	Maternal hemorrhage
25 to 29	Female	1997	1540.39652439983	1538.83991276556	1541.9510046106	Incidence	Global	Maternal hemorrhage
25 to 29	Female	1998	1533.24384420312	1531.69676790835	1534.78880040918	Incidence	Global	Maternal hemorrhage
25 to 29	Female	1999	1527.12751608158	1525.58837588344	1528.66454575012	Incidence	Global	Maternal hemorrhage
25 to 29	Female	2000	1522.08824304711	1520.55489544834	1523.61948752404	Incidence	Global	Maternal hemorrhage
25 to 29	Female	2001	1514.62614099376	1513.09783858173	1516.15234903955	Incidence	Global	Maternal hemorrhage
25 to 29	Female	2002	1503.46198895778	1501.93986170535	1504.98203410179	Incidence	Global	Maternal hemorrhage
25 to 29	Female	2003	1491.46622031546	1489.95171542837	1492.9786569035	Incidence	Global	Maternal hemorrhage
25 to 29	Female	2004	1480.05371294475	1478.54923135958	1481.55614108826	Incidence	Global	Maternal hemorrhage
25 to 29	Female	2005	1471.34376046573	1469.85101745699	1472.8344638931	Incidence	Global	Maternal hemorrhage
25 to 29	Female	2006	1466.25311643669	1464.77224101263	1467.73196349796	Incidence	Global	Maternal hemorrhage
25 to 29	Female	2007	1462.19929181183	1460.73142868211	1463.66513779706	Incidence	Global	Maternal hemorrhage
25 to 29	Female	2008	1457.92163338459	1456.46887446914	1459.37238796541	Incidence	Global	Maternal hemorrhage
25 to 29	Female	2009	1453.5205224812	1452.08450067603	1454.95	Incidence	Global	Maternal hemorrhage
25 to 29	Female	2010	1449.72577346027	1448.3070606505	1451.14251022034	Incidence	Global	Maternal hemorrhage
25 to 29	Female	2011	1448.49900871024	1447.09741556492	1449.89863828494	Incidence	Global	Maternal hemorrhage
25 to 29	Female	2012	1451.40891447874	1450.02190355488	1452.79396999299	Incidence	Global	Maternal hemorrhage
25 to 29	Female	2013	1455.9732376554	1454.59748942921	1457.34703545728	Incidence	Global	Maternal hemorrhage
25 to 29	Female	2014	1458.02295286945	1456.65583363181	1459.38812660745	Incidence	Global	Maternal hemorrhage
25 to 29	Female	2015	1452.77869658551	1451.41904507971	1454.13641145882	Incidence	Global	Maternal hemorrhage
25 to 29	Female	2016	1440.00045012928	1438.64668637169	1441.35228985511	Incidence	Global	Maternal hemorrhage
25 to 29	Female	2017	1423.02111322631	1421.67173659549	1424.36858016489	Incidence	Global	Maternal hemorrhage
25 to 29	Female	2018	1403.90702367391	1402.56113077463	1405.25102217377	Incidence	Global	Maternal hemorrhage
25 to 29	Female	2019	1384.44887303055	1383.10606087451	1385.78980627589	Incidence	Global	Maternal hemorrhage
25 to 29	Female	2020	1358.28744126109	1356.95157943146	1359.62144728246	Incidence	Global	Maternal hemorrhage
25 to 29	Female	2021	1350.55450492421	1349.21880781085	1351.88835189627	Incidence	Global	Maternal hemorrhage
25 to 29	Female	2022	1263.38776282917	1144.05217873532	1391.32266694634	Incidence	Global	Maternal hemorrhage
25 to 29	Female	2023	1232.58450226791	1109.07397463537	1365.47852915524	Incidence	Global	Maternal hemorrhage
25 to 29	Female	2024	1201.12425473464	1070.80377593655	1342.03538081539	Incidence	Global	Maternal hemorrhage
25 to 29	Female	2025	1169.63345212088	1030.02378572165	1321.59110021222	Incidence	Global	Maternal hemorrhage
25 to 29	Female	2026	1138.51277850287	987.484362288929	1304.34721314149	Incidence	Global	Maternal hemorrhage
25 to 29	Female	2027	1107.9240808595	943.822669483171	1290.13236320514	Incidence	Global	Maternal hemorrhage
25 to 29	Female	2028	1077.86332232936	899.624531878229	1278.44899079665	Incidence	Global	Maternal hemorrhage
25 to 29	Female	2029	1048.48802616798	855.362704277901	1269.25	Incidence	Global	Maternal hemorrhage
25 to 29	Female	2030	1019.99662004949	811.318861981564	1262.80779223395	Incidence	Global	Maternal hemorrhage
25 to 29	Female	2031	992.549787752426	767.621689150563	1259.5144756255	Incidence	Global	Maternal hemorrhage
25 to 29	Female	2032	966.194370839246	724.338004458004	1259.62236213006	Incidence	Global	Maternal hemorrhage
25 to 29	Female	2033	940.934163430682	681.720526083531	1263.02769018086	Incidence	Global	Maternal hemorrhage
25 to 29	Female	2034	916.770183118188	640.009730735323	1269.62013558026	Incidence	Global	Maternal hemorrhage
25 to 29	Female	2035	893.70105662398	599.41820626907	1279.30156733193	Incidence	Global	Maternal hemorrhage
25 to 29	Female	2036	871.723431741799	560.124573246975	1291.99407480247	Incidence	Global	Maternal hemorrhage
25 to 29	Female	2037	850.832390886012	522.272345195087	1307.64296457903	Incidence	Global	Maternal hemorrhage
25 to 29	Female	2038	831.021853381193	485.971354148418	1326.21746002051	Incidence	Global	Maternal hemorrhage
25 to 29	Female	2039	812.284963065097	451.300492126085	1347.71036466618	Incidence	Global	Maternal hemorrhage
25 to 29	Female	2040	794.614460848385	418.31105473739	1372.13729798113	Incidence	Global	Maternal hemorrhage
25 to 29	Female	2041	778.003046451698	387.03026086191	1399.5358312506	Incidence	Global	Maternal hemorrhage
25 to 29	Female	2042	762.443730362915	357.464697351031	1429.96469501819	Incidence	Global	Maternal hemorrhage
25 to 29	Female	2043	747.930177152638	329.603549645613	1463.5031489626	Incidence	Global	Maternal hemorrhage
25 to 29	Female	2044	734.457044345615	303.42154612318	1500.2505663183	Incidence	Global	Maternal hemorrhage
30 to 34	Female	1990	1212.05643052624	1210.49117846327	1213.61986387953	Incidence	Global	Maternal hemorrhage
30 to 34	Female	1991	1190.55917844122	1189.01871494859	1192.09785486962	Incidence	Global	Maternal hemorrhage
30 to 34	Female	1992	1165.3707738934	1163.86339094008	1166.87640769912	Incidence	Global	Maternal hemorrhage
30 to 34	Female	1993	1135.72028468589	1134.25555051528	1137.18331510829	Incidence	Global	Maternal hemorrhage
30 to 34	Female	1994	1106.99716455311	1105.57616423081	1108.41650565966	Incidence	Global	Maternal hemorrhage
30 to 34	Female	1995	1084.5608611306	1083.17753908709	1085.94255959442	Incidence	Global	Maternal hemorrhage
30 to 34	Female	1996	1070.20076354603	1068.84597553548	1071.55395192285	Incidence	Global	Maternal hemorrhage
30 to 34	Female	1997	1061.68104680147	1060.3471985714	1063.01331070756	Incidence	Global	Maternal hemorrhage
30 to 34	Female	1998	1059.30708104711	1057.98514981103	1060.62743388804	Incidence	Global	Maternal hemorrhage
30 to 34	Female	1999	1060.19076887738	1058.87572212851	1061.50423814016	Incidence	Global	Maternal hemorrhage
30 to 34	Female	2000	1062.25639078535	1060.94614469147	1063.56505844914	Incidence	Global	Maternal hemorrhage
30 to 34	Female	2001	1063.66643139146	1062.36185587891	1064.96942859699	Incidence	Global	Maternal hemorrhage
30 to 34	Female	2002	1064.62694277749	1063.32778405861	1065.92452380406	Incidence	Global	Maternal hemorrhage
30 to 34	Female	2003	1064.79016961149	1063.49646911206	1066.08229397555	Incidence	Global	Maternal hemorrhage
30 to 34	Female	2004	1064.98623451975	1063.69697561279	1066.27391852245	Incidence	Global	Maternal hemorrhage
30 to 34	Female	2005	1066.5896485164	1065.30255993445	1067.87516118444	Incidence	Global	Maternal hemorrhage
30 to 34	Female	2006	1069.93110231341	1068.64349764323	1071.21712731581	Incidence	Global	Maternal hemorrhage
30 to 34	Female	2007	1074.25877335102	1072.96934987871	1075.54661192215	Incidence	Global	Maternal hemorrhage
30 to 34	Female	2008	1078.84932273226	1077.55882691629	1080.13822841207	Incidence	Global	Maternal hemorrhage
30 to 34	Female	2009	1083.37024584238	1082.08106360823	1084.65783365593	Incidence	Global	Maternal hemorrhage
30 to 34	Female	2010	1088.98420779429	1087.69806529485	1090.2687511601	Incidence	Global	Maternal hemorrhage
30 to 34	Female	2011	1096.84724426332	1095.56415921667	1098.12872332166	Incidence	Global	Maternal hemorrhage
30 to 34	Female	2012	1104.53308564901	1103.25463852134	1105.80992095237	Incidence	Global	Maternal hemorrhage
30 to 34	Female	2013	1110.15089488881	1108.87988038786	1111.42029516109	Incidence	Global	Maternal hemorrhage
30 to 34	Female	2014	1112.36609901837	1111.10573858518	1113.62484772289	Incidence	Global	Maternal hemorrhage
30 to 34	Female	2015	1109.70542423212	1108.45961149528	1110.9496342857	Incidence	Global	Maternal hemorrhage
30 to 34	Female	2016	1102.90146355019	1101.67365076182	1104.12768829486	Incidence	Global	Maternal hemorrhage
30 to 34	Female	2017	1095.22168235733	1094.01168650302	1096.43010565498	Incidence	Global	Maternal hemorrhage
30 to 34	Female	2018	1087.69882484102	1086.50424798887	1088.89184341247	Incidence	Global	Maternal hemorrhage
30 to 34	Female	2019	1080.81100508468	1079.62822373207	1081.99224012756	Incidence	Global	Maternal hemorrhage
30 to 34	Female	2020	1069.68642924637	1068.51386244836	1070.85746467648	Incidence	Global	Maternal hemorrhage
30 to 34	Female	2021	1069.60838098003	1068.43566173037	1070.77956885856	Incidence	Global	Maternal hemorrhage
30 to 34	Female	2022	971.910098783726	880.504253482986	1069.91191222666	Incidence	Global	Maternal hemorrhage
30 to 34	Female	2023	957.044076927068	861.516819077951	1059.82367647629	Incidence	Global	Maternal hemorrhage
30 to 34	Female	2024	941.367372486143	839.509435123166	1051.5042110033	Incidence	Global	Maternal hemorrhage
30 to 34	Female	2025	924.455663000997	814.21669895455	1044.46960051663	Incidence	Global	Maternal hemorrhage
30 to 34	Female	2026	905.97555579568	785.659960070191	1038.14134434432	Incidence	Global	Maternal hemorrhage
30 to 34	Female	2027	885.912997960252	754.290419829331	1032.13520455318	Incidence	Global	Maternal hemorrhage
30 to 34	Female	2028	864.892528755966	721.232402371694	1026.62463565312	Incidence	Global	Maternal hemorrhage
30 to 34	Female	2029	843.471900273854	687.406657220999	1021.85593033307	Incidence	Global	Maternal hemorrhage
30 to 34	Female	2030	822.082661861097	653.481352525458	1018.0743346474	Incidence	Global	Maternal hemorrhage
30 to 34	Female	2031	801.000107585481	619.892559168769	1015.44256166356	Incidence	Global	Maternal hemorrhage
30 to 34	Female	2032	780.332351882863	586.89555620168	1013.9553589412	Incidence	Global	Maternal hemorrhage
30 to 34	Female	2033	760.068342050861	554.671601675774	1013.4021859583	Incidence	Global	Maternal hemorrhage
30 to 34	Female	2034	740.313644189707	523.363159237388	1013.88050749675	Incidence	Global	Maternal hemorrhage
30 to 34	Female	2035	721.206021912622	493.03476444986	1015.68456721403	Incidence	Global	Maternal hemorrhage
30 to 34	Female	2036	702.858	463.677554853166	1019.18611959454	Incidence	Global	Maternal hemorrhage
30 to 34	Female	2037	685.302842561454	435.242525789937	1024.65595202412	Incidence	Global	Maternal hemorrhage
30 to 34	Female	2038	668.541201314899	407.765884382016	1032.15090123457	Incidence	Global	Maternal hemorrhage
30 to 34	Female	2039	652.572784853397	381.288771470593	1041.71270212025	Incidence	Global	Maternal hemorrhage
30 to 34	Female	2040	637.395985393441	355.850571768849	1053.37722530702	Incidence	Global	Maternal hemorrhage
30 to 34	Female	2041	623.008309518468	331.485020326931	1067.18032568705	Incidence	Global	Maternal hemorrhage
30 to 34	Female	2042	609.406668604175	308.218088453509	1083.16162740252	Incidence	Global	Maternal hemorrhage
30 to 34	Female	2043	596.587662022457	286.067012483068	1101.36707832356	Incidence	Global	Maternal hemorrhage
30 to 34	Female	2044	584.547853024246	265.040068570233	1121.85076857208	Incidence	Global	Maternal hemorrhage
35 to 39	Female	1990	697.793526901965	696.550492597613	699.035566759997	Incidence	Global	Maternal hemorrhage
35 to 39	Female	1991	678.448178615051	677.237106052255	679.658285582739	Incidence	Global	Maternal hemorrhage
35 to 39	Female	1992	663.629108788117	662.44281611791	664.814457831806	Incidence	Global	Maternal hemorrhage
35 to 39	Female	1993	655.126637739697	653.955497214502	656.296846773719	Incidence	Global	Maternal hemorrhage
35 to 39	Female	1994	651.977637560573	650.814348112597	653.13999887081	Incidence	Global	Maternal hemorrhage
35 to 39	Female	1995	652.314907382294	651.156326953277	653.472556511481	Incidence	Global	Maternal hemorrhage
35 to 39	Female	1996	650.848724768378	649.699742213418	651.996774655624	Incidence	Global	Maternal hemorrhage
35 to 39	Female	1997	643.513901102606	642.38443465034	644.642442228483	Incidence	Global	Maternal hemorrhage
35 to 39	Female	1998	630.488975573256	629.389152003483	631.587889356647	Incidence	Global	Maternal hemorrhage
35 to 39	Female	1999	616.317146037584	615.24929835934	617.384101084389	Incidence	Global	Maternal hemorrhage
35 to 39	Female	2000	604.352611646391	603.313262222664	605.391082387385	Incidence	Global	Maternal hemorrhage
35 to 39	Female	2001	596.480213627737	595.462562388439	597.496994251618	Incidence	Global	Maternal hemorrhage
35 to 39	Female	2002	592.301571744853	591.299435788286	593.302839891911	Incidence	Global	Maternal hemorrhage
35 to 39	Female	2003	591.873995011748	590.880343520954	592.866776434558	Incidence	Global	Maternal hemorrhage
35 to 39	Female	2004	592.810622482668	591.822110932558	593.798260212902	Incidence	Global	Maternal hemorrhage
35 to 39	Female	2005	593.236199869492	592.252230329535	594.219293178818	Incidence	Global	Maternal hemorrhage
35 to 39	Female	2006	591.356093809507	590.378881699002	592.332431266431	Incidence	Global	Maternal hemorrhage
35 to 39	Female	2007	587.778448913653	586.808898982003	588.747128915388	Incidence	Global	Maternal hemorrhage
35 to 39	Female	2008	583.528512430926	582.566817513697	584.489343432653	Incidence	Global	Maternal hemorrhage
35 to 39	Female	2009	580.643286056374	579.687553639126	581.598158440847	Incidence	Global	Maternal hemorrhage
35 to 39	Female	2010	581.47242643317	580.518333657911	582.425657007943	Incidence	Global	Maternal hemorrhage
35 to 39	Female	2011	586.351740717181	585.394550607915	587.308059910817	Incidence	Global	Maternal hemorrhage
35 to 39	Female	2012	592.89744501798	591.935289871228	593.858717877041	Incidence	Global	Maternal hemorrhage
35 to 39	Female	2013	599.289267943957	598.322890476069	600.254751928938	Incidence	Global	Maternal hemorrhage
35 to 39	Female	2014	603.803019767866	602.835637285901	604.769500413914	Incidence	Global	Maternal hemorrhage
35 to 39	Female	2015	605.312184980416	604.348199590709	606.275264858709	Incidence	Global	Maternal hemorrhage
35 to 39	Female	2016	604.381692771318	603.424168846078	605.338311424957	Incidence	Global	Maternal hemorrhage
35 to 39	Female	2017	601.614892904545	600.666254865467	602.562628826817	Incidence	Global	Maternal hemorrhage
35 to 39	Female	2018	597.051564906773	596.114304512196	597.987929152877	Incidence	Global	Maternal hemorrhage
35 to 39	Female	2019	591.042964865025	590.119091389958	591.965950422426	Incidence	Global	Maternal hemorrhage
35 to 39	Female	2020	583.789719847012	582.880941998661	584.697619960383	Incidence	Global	Maternal hemorrhage
35 to 39	Female	2021	574.720718384353	573.829214064077	575.611358027655	Incidence	Global	Maternal hemorrhage
35 to 39	Female	2022	554.847737837333	502.777921065934	610.687228675838	Incidence	Global	Maternal hemorrhage
35 to 39	Female	2023	548.446613665086	493.832844098544	607.213367220338	Incidence	Global	Maternal hemorrhage
35 to 39	Female	2024	542.044198293941	483.541564733171	605.303611514557	Incidence	Global	Maternal hemorrhage
35 to 39	Female	2025	535.489073199652	471.797246409475	604.832709498985	Incidence	Global	Maternal hemorrhage
35 to 39	Female	2026	528.595970328978	458.568227551497	605.537699686642	Incidence	Global	Maternal hemorrhage
35 to 39	Female	2027	521.247509948633	443.966284358718	607.13904895594	Incidence	Global	Maternal hemorrhage
35 to 39	Female	2028	513.620213821841	428.435984781652	609.583247716215	Incidence	Global	Maternal hemorrhage
35 to 39	Female	2029	505.60179603563	412.116393309384	612.541407506435	Incidence	Global	Maternal hemorrhage
35 to 39	Female	2030	496.96028890691	395.005624272848	615.578968960654	Incidence	Global	Maternal hemorrhage
35 to 39	Female	2031	487.512106789248	377.126952858828	618.32548743561	Incidence	Global	Maternal hemorrhage
35 to 39	Female	2032	477.244244869818	358.643198098788	620.598991694367	Incidence	Global	Maternal hemorrhage
35 to 39	Female	2033	466.485570129044	339.998232762782	622.599486425791	Incidence	Global	Maternal hemorrhage
35 to 39	Female	2034	455.531194855713	321.532996048917	624.574285985452	Incidence	Global	Maternal hemorrhage
35 to 39	Female	2035	444.611	303.480025302357	626.759189303999	Incidence	Global	Maternal hemorrhage
35 to 39	Female	2036	433.870578591298	285.974324798679	629.326489576058	Incidence	Global	Maternal hemorrhage
35 to 39	Female	2037	423.367160449632	269.077041295584	632.334546007576	Incidence	Global	Maternal hemorrhage
35 to 39	Female	2038	413.091399278588	252.822545703249	635.706967281923	Incidence	Global	Maternal hemorrhage
35 to 39	Female	2039	403.098552215509	237.24314669796	639.528454191192	Incidence	Global	Maternal hemorrhage
35 to 39	Female	2040	393.462752091065	222.345996215683	643.985840087294	Incidence	Global	Maternal hemorrhage
35 to 39	Female	2041	384.245721086139	208.109743790646	649.305608732009	Incidence	Global	Maternal hemorrhage
35 to 39	Female	2042	375.466224045216	194.493637795441	655.656903229862	Incidence	Global	Maternal hemorrhage
35 to 39	Female	2043	367.12501339963	181.48710323511	663.102233558495	Incidence	Global	Maternal hemorrhage
35 to 39	Female	2044	359.222342765921	169.083014615763	671.696947755217	Incidence	Global	Maternal hemorrhage
40 to 44	Female	1990	332.676212332346	331.722281017728	333.630146407086	Incidence	Global	Maternal hemorrhage
40 to 44	Female	1991	318.842886718019	317.931439757247	319.754330390223	Incidence	Global	Maternal hemorrhage
40 to 44	Female	1992	308.851836073001	307.969932756754	309.733734244531	Incidence	Global	Maternal hemorrhage
40 to 44	Female	1993	298.931158422004	298.079202233529	299.783106279405	Incidence	Global	Maternal hemorrhage
40 to 44	Female	1994	292.279652193685	291.449131992638	293.11015915039	Incidence	Global	Maternal hemorrhage
40 to 44	Female	1995	284.94832110619	284.143406560676	285.753212849978	Incidence	Global	Maternal hemorrhage
40 to 44	Female	1996	279.914714820824	279.12554462513	280.703859499666	Incidence	Global	Maternal hemorrhage
40 to 44	Female	1997	276.860803177846	276.082796598217	277.638779322585	Incidence	Global	Maternal hemorrhage
40 to 44	Female	1998	276.049788585898	275.277463973953	276.822076002842	Incidence	Global	Maternal hemorrhage
40 to 44	Female	1999	276.787129853059	276.016976162772	277.557237827609	Incidence	Global	Maternal hemorrhage
40 to 44	Female	2000	278.118173375236	277.349625652299	278.886664731867	Incidence	Global	Maternal hemorrhage
40 to 44	Female	2001	277.874144918228	277.111748274087	278.636474614753	Incidence	Global	Maternal hemorrhage
40 to 44	Female	2002	274.596601302052	273.847747302413	275.34538040162	Incidence	Global	Maternal hemorrhage
40 to 44	Female	2003	268.41597464198	267.688046142825	269.143822161559	Incidence	Global	Maternal hemorrhage
40 to 44	Female	2004	261.234736029447	260.529980569493	261.939405684884	Incidence	Global	Maternal hemorrhage
40 to 44	Female	2005	254.390224895036	253.707117637327	255.073242637633	Incidence	Global	Maternal hemorrhage
40 to 44	Female	2006	248.095496770267	247.431032824216	248.759870172676	Incidence	Global	Maternal hemorrhage
40 to 44	Female	2007	242.157381273308	241.509051483687	242.805622226281	Incidence	Global	Maternal hemorrhage
40 to 44	Female	2008	237.58826546419	236.951656217137	238.224788463843	Incidence	Global	Maternal hemorrhage
40 to 44	Female	2009	234.463269835597	233.834927472533	235.091527250972	Incidence	Global	Maternal hemorrhage
40 to 44	Female	2010	233.112140827409	232.488891856708	233.735302607165	Incidence	Global	Maternal hemorrhage
40 to 44	Female	2011	232.970654177127	232.350993373307	233.590221971844	Incidence	Global	Maternal hemorrhage
40 to 44	Female	2012	233.346428310244	232.729327581154	233.963429453906	Incidence	Global	Maternal hemorrhage
40 to 44	Female	2013	233.848346840511	233.233365650186	234.463222084016	Incidence	Global	Maternal hemorrhage
40 to 44	Female	2014	234.430590075087	233.817074786276	235.043993865927	Incidence	Global	Maternal hemorrhage
40 to 44	Female	2015	235.136434025418	234.52345477526	235.74929727372	Incidence	Global	Maternal hemorrhage
40 to 44	Female	2016	235.891738748148	235.278368291624	236.504990085312	Incidence	Global	Maternal hemorrhage
40 to 44	Female	2017	236.527433864908	235.913496076268	237.141250326835	Incidence	Global	Maternal hemorrhage
40 to 44	Female	2018	236.888923468182	236.275159122548	237.502564380678	Incidence	Global	Maternal hemorrhage
40 to 44	Female	2019	236.823224742723	236.211299925344	237.435023299366	Incidence	Global	Maternal hemorrhage
40 to 44	Female	2020	236.545632770385	235.937090495372	237.154044410995	Incidence	Global	Maternal hemorrhage
40 to 44	Female	2021	234.955761337014	234.352944340028	235.558445811176	Incidence	Global	Maternal hemorrhage
40 to 44	Female	2022	233.925334585454	211.977040628251	257.438069889288	Incidence	Global	Maternal hemorrhage
40 to 44	Female	2023	232.26605924175	209.14536100332	257.12434144984	Incidence	Global	Maternal hemorrhage
40 to 44	Female	2024	230.275117844845	205.43065662301	257.120656862266	Incidence	Global	Maternal hemorrhage
40 to 44	Female	2025	228.038499420464	200.923746558942	257.538099797262	Incidence	Global	Maternal hemorrhage
40 to 44	Female	2026	225.647944603714	195.762385618492	258.457740267374	Incidence	Global	Maternal hemorrhage
40 to 44	Female	2027	223.19748642424	190.114418567001	259.934260247997	Incidence	Global	Maternal hemorrhage
40 to 44	Female	2028	220.771045802928	184.168103646665	261.971970692116	Incidence	Global	Maternal hemorrhage
40 to 44	Female	2029	218.364397058718	178.007185105099	264.501412521425	Incidence	Global	Maternal hemorrhage
40 to 44	Female	2030	215.91561548507	171.644403409537	267.405943674458	Incidence	Global	Maternal hemorrhage
40 to 44	Female	2031	213.349167429447	165.071899981066	270.559792260191	Incidence	Global	Maternal hemorrhage
40 to 44	Female	2032	210.616527865672	158.30611959168	273.86127014409	Incidence	Global	Maternal hemorrhage
40 to 44	Female	2033	207.78694280866	151.467282691737	277.330090058538	Incidence	Global	Maternal hemorrhage
40 to 44	Female	2034	204.813351164576	144.567810160684	280.858866814999	Incidence	Global	Maternal hemorrhage
40 to 44	Female	2035	201.600401752543	137.578170597955	284.281529316594	Incidence	Global	Maternal hemorrhage
40 to 44	Female	2036	198.071758285252	130.483874102211	287.451164844528	Incidence	Global	Maternal hemorrhage
40 to 44	Female	2037	194.219711456096	123.32286462558	290.302123984209	Incidence	Global	Maternal hemorrhage
40 to 44	Female	2038	190.175017088865	116.230347424899	292.94777914967	Incidence	Global	Maternal hemorrhage
40 to 44	Female	2039	186.055700637435	109.308642443864	295.518060731474	Incidence	Global	Maternal hemorrhage
40 to 44	Female	2040	181.954059518429	102.624787369232	298.134387517053	Incidence	Global	Maternal hemorrhage
40 to 44	Female	2041	177.929147074137	96.2138768267735	300.88689041369	Incidence	Global	Maternal hemorrhage
40 to 44	Female	2042	174.003508625064	90.0868113357278	303.811478300942	Incidence	Global	Maternal hemorrhage
40 to 44	Female	2043	170.172453720603	84.2458514734439	306.88049888978	Incidence	Global	Maternal hemorrhage
40 to 44	Female	2044	166.458194028126	78.6951188568428	310.136499329414	Incidence	Global	Maternal hemorrhage
45 to 49	Female	1990	127.804288066522	127.148870911141	128.460806932811	Incidence	Global	Maternal hemorrhage
45 to 49	Female	1991	122.820463511028	122.182502859801	123.459527805493	Incidence	Global	Maternal hemorrhage
45 to 49	Female	1992	115.602527137436	114.994172304352	116.211965301726	Incidence	Global	Maternal hemorrhage
45 to 49	Female	1993	108.830367420569	108.250739052422	109.411055366198	Incidence	Global	Maternal hemorrhage
45 to 49	Female	1994	101.585256698919	101.038725649231	102.132808330413	Incidence	Global	Maternal hemorrhage
45 to 49	Female	1995	97.4187040556484	96.8939125740508	97.944478491154	Incidence	Global	Maternal hemorrhage
45 to 49	Female	1996	94.5386329632301	94.0338503638093	95.0443435877085	Incidence	Global	Maternal hemorrhage
45 to 49	Female	1997	92.900879536189	92.4086795549212	93.3939698068073	Incidence	Global	Maternal hemorrhage
45 to 49	Female	1998	91.1129100792935	90.6341080438428	91.5925631001127	Incidence	Global	Maternal hemorrhage
45 to 49	Female	1999	90.0501437817299	89.5807633660165	90.5203438932289	Incidence	Global	Maternal hemorrhage
45 to 49	Female	2000	87.8675619715826	87.4125410681627	88.3233659621589	Incidence	Global	Maternal hemorrhage
45 to 49	Female	2001	86.1816947641459	85.7361879812721	86.6279652558223	Incidence	Global	Maternal hemorrhage
45 to 49	Female	2002	85.0122014911405	84.5739092542455	85.4512406512531	Incidence	Global	Maternal hemorrhage
45 to 49	Female	2003	84.3219078355473	83.8883204220959	84.7562299053532	Incidence	Global	Maternal hemorrhage
45 to 49	Female	2004	83.7525129261887	83.3225673981107	84.1831843605312	Incidence	Global	Maternal hemorrhage
45 to 49	Female	2005	82.9521443149852	82.5265304831367	83.3784760060417	Incidence	Global	Maternal hemorrhage
45 to 49	Female	2006	81.1211815260302	80.7038055381641	81.5392658428188	Incidence	Global	Maternal hemorrhage
45 to 49	Female	2007	77.9860706510243	77.5820470225876	78.3907903337783	Incidence	Global	Maternal hemorrhage
45 to 49	Female	2008	74.0198495091906	73.6331973460415	74.4071795640623	Incidence	Global	Maternal hemorrhage
45 to 49	Female	2009	70.1427081116025	69.7736343188374	70.5124387612781	Incidence	Global	Maternal hemorrhage
45 to 49	Female	2010	67.205	66.8503769351903	67.5602428373895	Incidence	Global	Maternal hemorrhage
45 to 49	Female	2011	65.2333945746974	64.8894115917479	65.5779918444488	Incidence	Global	Maternal hemorrhage
45 to 49	Female	2012	63.6108121701456	63.2754647438052	63.9467578352669	Incidence	Global	Maternal hemorrhage
45 to 49	Female	2013	62.4345252838368	62.1052537701339	62.7643844090162	Incidence	Global	Maternal hemorrhage
45 to 49	Female	2014	61.5586370218264	61.2338176428127	61.8840364493475	Incidence	Global	Maternal hemorrhage
45 to 49	Female	2015	60.8727652793844	60.5514903621926	61.1946139454363	Incidence	Global	Maternal hemorrhage
45 to 49	Female	2016	60.1969105708689	59.879240059321	60.5151480072728	Incidence	Global	Maternal hemorrhage
45 to 49	Female	2017	59.5782070231907	59.2637859681404	59.8931890796233	Incidence	Global	Maternal hemorrhage
45 to 49	Female	2018	58.9872934138782	58.6758882277813	59.299254459152	Incidence	Global	Maternal hemorrhage
45 to 49	Female	2019	58.4721782489247	58.1632935657334	58.7816149163681	Incidence	Global	Maternal hemorrhage
45 to 49	Female	2020	58.0507488538245	57.7437046099586	58.3583431594528	Incidence	Global	Maternal hemorrhage
45 to 49	Female	2021	57.6186535597877	57.3129898133952	57.9248683395292	Incidence	Global	Maternal hemorrhage
45 to 49	Female	2022	65.7154095528989	59.5480760516327	72.3266816553729	Incidence	Global	Maternal hemorrhage
45 to 49	Female	2023	65.8771136990927	59.3173361943791	72.9325760206923	Incidence	Global	Maternal hemorrhage
45 to 49	Female	2024	65.9370422866268	58.8206242863733	73.6298433868677	Incidence	Global	Maternal hemorrhage
45 to 49	Female	2025	65.8724973171595	58.0377367139851	74.4011309466038	Incidence	Global	Maternal hemorrhage
45 to 49	Female	2026	65.6794988333624	56.9787950381857	75.2375154724046	Incidence	Global	Maternal hemorrhage
45 to 49	Female	2027	65.366	55.6753079230512	76.1326635368031	Incidence	Global	Maternal hemorrhage
45 to 49	Female	2028	64.9460247122967	54.1758411767286	77.0734087264204	Incidence	Global	Maternal hemorrhage
45 to 49	Female	2029	64.4396731954326	52.5270863100496	78.0601413827253	Incidence	Global	Maternal hemorrhage
45 to 49	Female	2030	63.8705801898965	50.7710437442215	79.1053500275505	Incidence	Global	Maternal hemorrhage
45 to 49	Female	2031	63.2641607928128	48.945156656329	80.2297410379105	Incidence	Global	Maternal hemorrhage
45 to 49	Female	2032	62.646524861817	47.084545205636	81.4571290233417	Incidence	Global	Maternal hemorrhage
45 to 49	Female	2033	62.0407882652517	45.2241021743517	82.8024340259885	Incidence	Global	Maternal hemorrhage
45 to 49	Female	2034	61.4455341818897	43.3730399661617	84.2571836417681	Incidence	Global	Maternal hemorrhage
45 to 49	Female	2035	60.8432642210577	41.5254307567157	85.7954313072948	Incidence	Global	Maternal hemorrhage
45 to 49	Female	2036	60.2125561142116	39.6723220243524	87.3855473939195	Incidence	Global	Maternal hemorrhage
45 to 49	Female	2037	59.539435886773	37.8120510055076	89.001779520312	Incidence	Global	Maternal hemorrhage
45 to 49	Female	2038	58.8429526339463	35.9683217044189	90.6574718301502	Incidence	Global	Maternal hemorrhage
45 to 49	Female	2039	58.1093661446292	34.1402830893737	92.3221325033138	Incidence	Global	Maternal hemorrhage
45 to 49	Female	2040	57.3111702399165	32.3182071301849	93.9436483312954	Incidence	Global	Maternal hemorrhage
45 to 49	Female	2041	56.4260715460921	30.496635756277	95.4744248677079	Incidence	Global	Maternal hemorrhage
45 to 49	Female	2042	55.4510970028695	28.6826703021699	96.8930673219338	Incidence	Global	Maternal hemorrhage
45 to 49	Female	2043	54.422617100519	26.9057975247595	98.2387163539892	Incidence	Global	Maternal hemorrhage
45 to 49	Female	2044	53.3737332012014	25.1878993888148	99.5556578050358	Incidence	Global	Maternal hemorrhage
15 to 19	Female	1990	724.359225117987	723.315684453255	725.401668579205	Incidence	Global	Maternal hypertensive disorders
15 to 19	Female	1991	715.31428868611	714.276785150817	716.350708811994	Incidence	Global	Maternal hypertensive disorders
15 to 19	Female	1992	709.076472266132	708.042774660258	710.109096017791	Incidence	Global	Maternal hypertensive disorders
15 to 19	Female	1993	704.757602544279	703.727147936622	705.786989909541	Incidence	Global	Maternal hypertensive disorders
15 to 19	Female	1994	701.297456813084	700.271389755682	702.322461856515	Incidence	Global	Maternal hypertensive disorders
15 to 19	Female	1995	698.767087436249	697.746842652665	699.786273919178	Incidence	Global	Maternal hypertensive disorders
15 to 19	Female	1996	695.900185582607	694.887562958654	696.911754100049	Incidence	Global	Maternal hypertensive disorders
15 to 19	Female	1997	691.195195011317	690.192656678539	692.196686247999	Incidence	Global	Maternal hypertensive disorders
15 to 19	Female	1998	684.924389456571	683.934174727118	685.913566500754	Incidence	Global	Maternal hypertensive disorders
15 to 19	Female	1999	677.602183793175	676.62596616557	678.577374767155	Incidence	Global	Maternal hypertensive disorders
15 to 19	Female	2000	669.652562632996	668.691610792805	670.61249983435	Incidence	Global	Maternal hypertensive disorders
15 to 19	Female	2001	660.936776585562	659.992537075588	661.880014672936	Incidence	Global	Maternal hypertensive disorders
15 to 19	Female	2002	651.948217604163	651.020619355168	652.874828100282	Incidence	Global	Maternal hypertensive disorders
15 to 19	Female	2003	643.344873898835	642.432183837508	644.256589303314	Incidence	Global	Maternal hypertensive disorders
15 to 19	Female	2004	635.242772958112	634.342468725195	636.142114843641	Incidence	Global	Maternal hypertensive disorders
15 to 19	Female	2005	627.262549137819	626.371955858194	628.152192142575	Incidence	Global	Maternal hypertensive disorders
15 to 19	Female	2006	617.912431365078	617.029581671374	618.794344894595	Incidence	Global	Maternal hypertensive disorders
15 to 19	Female	2007	606.611081751452	605.735260415402	607.485984103982	Incidence	Global	Maternal hypertensive disorders
15 to 19	Female	2008	594.978742369417	594.108899970898	595.847683733675	Incidence	Global	Maternal hypertensive disorders
15 to 19	Female	2009	584.748570820519	583.883045804694	585.613210899305	Incidence	Global	Maternal hypertensive disorders
15 to 19	Female	2010	578.020738951146	577.156744359864	578.883859480378	Incidence	Global	Maternal hypertensive disorders
15 to 19	Female	2011	571.950094931615	571.087987707418	572.811338012528	Incidence	Global	Maternal hypertensive disorders
15 to 19	Female	2012	563.045145639566	562.188178828069	563.901262769099	Incidence	Global	Maternal hypertensive disorders
15 to 19	Female	2013	552.542673411832	551.692801950808	553.391712317783	Incidence	Global	Maternal hypertensive disorders
15 to 19	Female	2014	541.670598670074	540.828649753923	542.511732890371	Incidence	Global	Maternal hypertensive disorders
15 to 19	Female	2015	531.533715226675	530.699762740607	532.366869754577	Incidence	Global	Maternal hypertensive disorders
15 to 19	Female	2016	520.207350694936	519.382813444585	521.031108786726	Incidence	Global	Maternal hypertensive disorders
15 to 19	Female	2017	506.155075398749	505.342752360134	506.966642742273	Incidence	Global	Maternal hypertensive disorders
15 to 19	Female	2018	491.664108058957	490.865240868529	492.462243829208	Incidence	Global	Maternal hypertensive disorders
15 to 19	Female	2019	479.107298448563	478.321249939966	479.892636470019	Incidence	Global	Maternal hypertensive disorders
15 to 19	Female	2020	468.023323123496	467.249674551469	468.796279489442	Incidence	Global	Maternal hypertensive disorders
15 to 19	Female	2021	460.592651802331	459.829329350971	461.355293690877	Incidence	Global	Maternal hypertensive disorders
15 to 19	Female	2022	448.976955705311	407.996751353485	492.77393937593	Incidence	Global	Maternal hypertensive disorders
15 to 19	Female	2023	438.427125022315	391.038671042593	489.714404857606	Incidence	Global	Maternal hypertensive disorders
15 to 19	Female	2024	428.244386595263	372.684794051882	489.43573397774	Incidence	Global	Maternal hypertensive disorders
15 to 19	Female	2025	418.441378765008	353.523674703233	491.487316315394	Incidence	Global	Maternal hypertensive disorders
15 to 19	Female	2026	409.02892497247	334.029523954454	495.511336484486	Incidence	Global	Maternal hypertensive disorders
15 to 19	Female	2027	400.016283015526	314.549090511336	501.26441623871	Incidence	Global	Maternal hypertensive disorders
15 to 19	Female	2028	391.411362201647	295.329952239229	508.59284541754	Incidence	Global	Maternal hypertensive disorders
15 to 19	Female	2029	383.220927670197	276.548934932941	517.405853319793	Incidence	Global	Maternal hypertensive disorders
15 to 19	Female	2030	375.450802033132	258.332671362992	527.656373324701	Incidence	Global	Maternal hypertensive disorders
15 to 19	Female	2031	368.106065686253	240.771388078721	539.328617990435	Incidence	Global	Maternal hypertensive disorders
15 to 19	Female	2032	361.191255732161	223.928132191303	552.430299990798	Incidence	Global	Maternal hypertensive disorders
15 to 19	Female	2033	354.710564015165	207.845110257168	566.987799763666	Incidence	Global	Maternal hypertensive disorders
15 to 19	Female	2034	348.668033905315	192.548205309734	583.043182240248	Incidence	Global	Maternal hypertensive disorders
15 to 19	Female	2035	343.067756891454	178.050320926127	600.652394129942	Incidence	Global	Maternal hypertensive disorders
15 to 19	Female	2036	337.91407022214	164.353945521393	619.884239518719	Incidence	Global	Maternal hypertensive disorders
15 to 19	Female	2037	333.211757068523	151.453178767184	640.819890138048	Incidence	Global	Maternal hypertensive disorders
15 to 19	Female	2038	328.966251031976	139.335372131062	663.552780417224	Incidence	Global	Maternal hypertensive disorders
15 to 19	Female	2039	325.183847170197	127.982482044006	688.18879572687	Incidence	Global	Maternal hypertensive disorders
15 to 19	Female	2040	321.871922095695	117.372201187859	714.846695144143	Incidence	Global	Maternal hypertensive disorders
15 to 19	Female	2041	319.039166120377	107.478913095079	743.65873632373	Incidence	Global	Maternal hypertensive disorders
15 to 19	Female	2042	316.695830896687	98.2745022624995	774.771481707707	Incidence	Global	Maternal hypertensive disorders
15 to 19	Female	2043	314.853996553468	89.7290434980393	808.346776315873	Incidence	Global	Maternal hypertensive disorders
15 to 19	Female	2044	313.527862964129	81.8113887040323	844.562894648135	Incidence	Global	Maternal hypertensive disorders
20 to 24	Female	1990	1758.61534307701	1756.95133516664	1760.27699358284	Incidence	Global	Maternal hypertensive disorders
20 to 24	Female	1991	1725.12664182269	1723.48543420392	1726.76553056517	Incidence	Global	Maternal hypertensive disorders
20 to 24	Female	1992	1697.18504901861	1695.5626026693	1698.80520850005	Incidence	Global	Maternal hypertensive disorders
20 to 24	Female	1993	1674.54870290669	1672.94159365796	1676.15355135157	Incidence	Global	Maternal hypertensive disorders
20 to 24	Female	1994	1659.2172682232	1657.62065010921	1660.81164327202	Incidence	Global	Maternal hypertensive disorders
20 to 24	Female	1995	1654.38835043108	1652.79592522834	1655.97853876278	Incidence	Global	Maternal hypertensive disorders
20 to 24	Female	1996	1670.17528746134	1668.57583025013	1671.77249214582	Incidence	Global	Maternal hypertensive disorders
20 to 24	Female	1997	1706.63338553495	1705.01664010393	1708.24784177385	Incidence	Global	Maternal hypertensive disorders
20 to 24	Female	1998	1751.72542241969	1750.08881292931	1753.35969884903	Incidence	Global	Maternal hypertensive disorders
20 to 24	Female	1999	1791.37676875344	1789.72605810722	1793.0251106453	Incidence	Global	Maternal hypertensive disorders
20 to 24	Female	2000	1811.46638386486	1809.81405570797	1813.1163295762	Incidence	Global	Maternal hypertensive disorders
20 to 24	Female	2001	1814.73151868174	1813.08745924067	1816.37320007683	Incidence	Global	Maternal hypertensive disorders
20 to 24	Female	2002	1812.02753578654	1810.39632646869	1813.65637873428	Incidence	Global	Maternal hypertensive disorders
20 to 24	Female	2003	1801.14392272144	1799.53122693175	1802.75427323829	Incidence	Global	Maternal hypertensive disorders
20 to 24	Female	2004	1780.18111141425	1778.59318683095	1781.76672279635	Incidence	Global	Maternal hypertensive disorders
20 to 24	Female	2005	1747.63377157982	1746.07735761186	1749.18791661716	Incidence	Global	Maternal hypertensive disorders
20 to 24	Female	2006	1691.09805607814	1689.58536527291	1692.6085460537	Incidence	Global	Maternal hypertensive disorders
20 to 24	Female	2007	1613.2319801234	1611.77203206658	1614.68981535258	Incidence	Global	Maternal hypertensive disorders
20 to 24	Female	2008	1533.23371563863	1531.82533955434	1534.64006761301	Incidence	Global	Maternal hypertensive disorders
20 to 24	Female	2009	1468.47225512906	1467.10513142238	1469.83742651146	Incidence	Global	Maternal hypertensive disorders
20 to 24	Female	2010	1435.05330201002	1433.70810542592	1436.39658392762	Incidence	Global	Maternal hypertensive disorders
20 to 24	Female	2011	1426.11875320221	1424.77868010078	1427.45692119516	Incidence	Global	Maternal hypertensive disorders
20 to 24	Female	2012	1422.3289096695	1420.98800104871	1423.66791506262	Incidence	Global	Maternal hypertensive disorders
20 to 24	Female	2013	1422.64372181625	1421.29777758141	1423.98775899549	Incidence	Global	Maternal hypertensive disorders
20 to 24	Female	2014	1425.58026211008	1424.22688823083	1426.93172167781	Incidence	Global	Maternal hypertensive disorders
20 to 24	Female	2015	1429.47311557341	1428.11189428196	1430.83241438679	Incidence	Global	Maternal hypertensive disorders
20 to 24	Female	2016	1426.55227123037	1425.18821261465	1427.91440733862	Incidence	Global	Maternal hypertensive disorders
20 to 24	Female	2017	1413.33251188275	1411.97240075058	1414.69071225543	Incidence	Global	Maternal hypertensive disorders
20 to 24	Female	2018	1395.40253026404	1394.04985435026	1396.75331289841	Incidence	Global	Maternal hypertensive disorders
20 to 24	Female	2019	1378.17745092456	1376.83283200743	1379.52019407316	Incidence	Global	Maternal hypertensive disorders
20 to 24	Female	2020	1350.37077591187	1349.04043447351	1351.6992708469	Incidence	Global	Maternal hypertensive disorders
20 to 24	Female	2021	1341.94159226235	1340.61648165126	1343.26486589069	Incidence	Global	Maternal hypertensive disorders
20 to 24	Female	2022	1289.31358530935	1191.27554431445	1392.98900543315	Incidence	Global	Maternal hypertensive disorders
20 to 24	Female	2023	1258.83232513863	1155.86766962513	1368.40197035163	Incidence	Global	Maternal hypertensive disorders
20 to 24	Female	2024	1228.77	1117.86583899705	1347.94313793587	Incidence	Global	Maternal hypertensive disorders
20 to 24	Female	2025	1199.5783368971	1077.2931019716	1332.68790343218	Incidence	Global	Maternal hypertensive disorders
20 to 24	Female	2026	1171.41573505446	1033.83189872237	1323.46394810122	Incidence	Global	Maternal hypertensive disorders
20 to 24	Female	2027	1144.20226960532	987.342048925379	1320.58298813446	Incidence	Global	Maternal hypertensive disorders
20 to 24	Female	2028	1117.97377055656	938.759956961261	1323.46884615802	Incidence	Global	Maternal hypertensive disorders
20 to 24	Female	2029	1092.76137893393	889.046672338693	1331.52021916172	Incidence	Global	Maternal hypertensive disorders
20 to 24	Female	2030	1068.59189197717	839.025396010378	1344.24594820409	Incidence	Global	Maternal hypertensive disorders
20 to 24	Female	2031	1045.48825976868	789.350391823753	1361.28789481753	Incidence	Global	Maternal hypertensive disorders
20 to 24	Female	2032	1023.47013351554	740.524460955103	1382.40630480022	Incidence	Global	Maternal hypertensive disorders
20 to 24	Female	2033	1002.5544157328	692.927158677153	1407.45773830268	Incidence	Global	Maternal hypertensive disorders
20 to 24	Female	2034	982.755803985453	646.840777832029	1436.37542818019	Incidence	Global	Maternal hypertensive disorders
20 to 24	Female	2035	964.087327741501	602.471168987097	1469.15425350898	Incidence	Global	Maternal hypertensive disorders
20 to 24	Female	2036	946.560879185516	559.963732518069	1505.83999327771	Incidence	Global	Maternal hypertensive disorders
20 to 24	Female	2037	930.187739483318	519.415637325636	1546.52195207641	Incidence	Global	Maternal hypertensive disorders
20 to 24	Female	2038	914.979102780462	480.885261087091	1591.32808746594	Incidence	Global	Maternal hypertensive disorders
20 to 24	Female	2039	900.94660103226	444.399609343367	1640.42197527923	Incidence	Global	Maternal hypertensive disorders
20 to 24	Female	2040	888.102833558676	409.960255583113	1694.00113372981	Incidence	Global	Maternal hypertensive disorders
20 to 24	Female	2041	876.461906015443	377.548179462926	1752.29637478961	Incidence	Global	Maternal hypertensive disorders
20 to 24	Female	2042	866.039984316301	347.127764249797	1815.57196391511	Incidence	Global	Maternal hypertensive disorders
20 to 24	Female	2043	856.855869964462	318.650137970442	1884.12643890643	Incidence	Global	Maternal hypertensive disorders
20 to 24	Female	2044	848.93160428801	292.05598976279	1958.29399066187	Incidence	Global	Maternal hypertensive disorders
25 to 29	Female	1990	1840.68561580032	1838.89270825775	1842.47602014712	Incidence	Global	Maternal hypertensive disorders
25 to 29	Female	1991	1787.04368193764	1785.30227798973	1788.78265512449	Incidence	Global	Maternal hypertensive disorders
25 to 29	Female	1992	1743.49565156983	1741.79568726218	1745.19324366563	Incidence	Global	Maternal hypertensive disorders
25 to 29	Female	1993	1712.03058166236	1710.35927086895	1713.6995616767	Incidence	Global	Maternal hypertensive disorders
25 to 29	Female	1994	1690.72429812083	1689.07243074416	1692.3738627996	Incidence	Global	Maternal hypertensive disorders
25 to 29	Female	1995	1679.63160097864	1677.99218492646	1681.26873051618	Incidence	Global	Maternal hypertensive disorders
25 to 29	Female	1996	1679.13481338179	1677.50298816547	1680.76435756877	Incidence	Global	Maternal hypertensive disorders
25 to 29	Female	1997	1686.78256137512	1685.15368584015	1688.40915260651	Incidence	Global	Maternal hypertensive disorders
25 to 29	Female	1998	1699.1055645216	1697.47697342339	1700.73186309879	Incidence	Global	Maternal hypertensive disorders
25 to 29	Female	1999	1714.02764852276	1712.39705141357	1715.65594165282	Incidence	Global	Maternal hypertensive disorders
25 to 29	Female	2000	1730.33146742195	1728.69659472383	1731.96402225938	Incidence	Global	Maternal hypertensive disorders
25 to 29	Female	2001	1746.88923618738	1745.24793038808	1748.52820860769	Incidence	Global	Maternal hypertensive disorders
25 to 29	Female	2002	1763.10825367933	1761.4599161025	1764.75424220376	Incidence	Global	Maternal hypertensive disorders
25 to 29	Female	2003	1776.91966293219	1775.26655385505	1778.57041055698	Incidence	Global	Maternal hypertensive disorders
25 to 29	Female	2004	1784.34525397079	1782.69331989643	1785.99482274069	Incidence	Global	Maternal hypertensive disorders
25 to 29	Female	2005	1783.12416112906	1781.48083294265	1784.76513124401	Incidence	Global	Maternal hypertensive disorders
25 to 29	Female	2006	1766.63195709714	1765.00643762021	1768.26	Incidence	Global	Maternal hypertensive disorders
25 to 29	Female	2007	1734.10868915626	1732.51014663468	1735.70493810851	Incidence	Global	Maternal hypertensive disorders
25 to 29	Female	2008	1694.3643456418	1692.79820117208	1695.92824590306	Incidence	Global	Maternal hypertensive disorders
25 to 29	Female	2009	1658.39573597121	1656.86184404386	1659.92743057342	Incidence	Global	Maternal hypertensive disorders
25 to 29	Female	2010	1637.99646128967	1636.48844042743	1639.50231713247	Incidence	Global	Maternal hypertensive disorders
25 to 29	Female	2011	1627.87017318478	1626.38433558319	1629.35386896444	Incidence	Global	Maternal hypertensive disorders
25 to 29	Female	2012	1617.82176534709	1616.35740408556	1619.2840075376	Incidence	Global	Maternal hypertensive disorders
25 to 29	Female	2013	1610.05544084153	1608.60873704246	1611.50004408565	Incidence	Global	Maternal hypertensive disorders
25 to 29	Female	2014	1605.26525920143	1603.83078083139	1606.69764955406	Incidence	Global	Maternal hypertensive disorders
25 to 29	Female	2015	1602.87807999736	1601.44992736463	1604.30415107445	Incidence	Global	Maternal hypertensive disorders
25 to 29	Female	2016	1600.91269731959	1599.4853070979	1602.33800775854	Incidence	Global	Maternal hypertensive disorders
25 to 29	Female	2017	1597.71608103145	1596.28627979922	1599.14380245385	Incidence	Global	Maternal hypertensive disorders
25 to 29	Female	2018	1595.57385794228	1594.13903170267	1597.00660168085	Incidence	Global	Maternal hypertensive disorders
25 to 29	Female	2019	1597.03475158271	1595.5925195711	1598.4748944165	Incidence	Global	Maternal hypertensive disorders
25 to 29	Female	2020	1584.28916855375	1582.8464373766	1585.72981790131	Incidence	Global	Maternal hypertensive disorders
25 to 29	Female	2021	1605.06149879551	1603.60535843758	1606.51553430631	Incidence	Global	Maternal hypertensive disorders
25 to 29	Female	2022	1497.00146379169	1383.89579388945	1616.48304966222	Incidence	Global	Maternal hypertensive disorders
25 to 29	Female	2023	1473.87417780067	1353.81752002384	1601.53439112825	Incidence	Global	Maternal hypertensive disorders
25 to 29	Female	2024	1448.2336465431	1317.93481260646	1588.13793488862	Incidence	Global	Maternal hypertensive disorders
25 to 29	Female	2025	1420.46336861011	1276.90366407921	1576.51788145659	Incidence	Global	Maternal hypertensive disorders
25 to 29	Female	2026	1390.8992463703	1231.55536849783	1566.61797043425	Incidence	Global	Maternal hypertensive disorders
25 to 29	Female	2027	1359.88125852339	1182.90431172809	1558.17622451406	Incidence	Global	Maternal hypertensive disorders
25 to 29	Female	2028	1328.52479456716	1132.8743506116	1551.47952887754	Incidence	Global	Maternal hypertensive disorders
25 to 29	Female	2029	1297.69093006677	1082.65066631576	1547.11066315708	Incidence	Global	Maternal hypertensive disorders
25 to 29	Female	2030	1267.8637186436	1032.6280414967	1545.79289056332	Incidence	Global	Maternal hypertensive disorders
25 to 29	Female	2031	1239.19412704463	982.645634032473	1548.28262639442	Incidence	Global	Maternal hypertensive disorders
25 to 29	Female	2032	1211.60199200642	932.393973128431	1555.12519945398	Incidence	Global	Maternal hypertensive disorders
25 to 29	Female	2033	1185.12036113621	882.163898411285	1566.38188167888	Incidence	Global	Maternal hypertensive disorders
25 to 29	Female	2034	1159.77784788732	832.292196132455	1582.05166449843	Incidence	Global	Maternal hypertensive disorders
25 to 29	Female	2035	1135.59922922774	783.112873918398	1602.11577083175	Incidence	Global	Maternal hypertensive disorders
25 to 29	Female	2036	1112.60606885335	734.931563838874	1626.56133840064	Incidence	Global	Maternal hypertensive disorders
25 to 29	Female	2037	1090.81733160048	688.013308012114	1655.39458706679	Incidence	Global	Maternal hypertensive disorders
25 to 29	Female	2038	1070.24997780688	642.578221708208	1688.64831035633	Incidence	Global	Maternal hypertensive disorders
25 to 29	Female	2039	1050.91954135325	598.801758950186	1726.38601773991	Incidence	Global	Maternal hypertensive disorders
25 to 29	Female	2040	1032.84069757151	556.817520115563	1768.70411149978	Incidence	Global	Maternal hypertensive disorders
25 to 29	Female	2041	1016.02783470855	516.72130267893	1815.73300098996	Incidence	Global	Maternal hypertensive disorders
25 to 29	Female	2042	1000.4956345144	478.575605900242	1867.63774221383	Incidence	Global	Maternal hypertensive disorders
25 to 29	Female	2043	986.25965328145	442.414135550187	1924.62	Incidence	Global	Maternal hypertensive disorders
25 to 29	Female	2044	973.336918143507	408.246067509382	1986.91147370283	Incidence	Global	Maternal hypertensive disorders
30 to 34	Female	1990	1506.58720284146	1504.84206999188	1508.33013650135	Incidence	Global	Maternal hypertensive disorders
30 to 34	Female	1991	1491.97405552492	1490.2495466678	1493.69638803647	Incidence	Global	Maternal hypertensive disorders
30 to 34	Female	1992	1469.1527518364	1467.46022831963	1470.84313461347	Incidence	Global	Maternal hypertensive disorders
30 to 34	Female	1993	1437.49694302876	1435.84902018868	1439.14277465816	Incidence	Global	Maternal hypertensive disorders
30 to 34	Female	1994	1404.37086245851	1402.77030038688	1405.96938551987	Incidence	Global	Maternal hypertensive disorders
30 to 34	Female	1995	1376.31787106837	1374.75951590324	1377.87423243489	Incidence	Global	Maternal hypertensive disorders
30 to 34	Female	1996	1353.94274363037	1352.4188687673	1355.46466120941	Incidence	Global	Maternal hypertensive disorders
30 to 34	Female	1997	1335.73247144013	1334.23630838488	1337.2267068316	Incidence	Global	Maternal hypertensive disorders
30 to 34	Female	1998	1325.05607931368	1323.57756968994	1326.53267932183	Incidence	Global	Maternal hypertensive disorders
30 to 34	Female	1999	1322.04030998027	1320.57178864762	1323.50692916201	Incidence	Global	Maternal hypertensive disorders
30 to 34	Female	2000	1327.37487456173	1325.91019024968	1328.8376537426	Incidence	Global	Maternal hypertensive disorders
30 to 34	Female	2001	1336.22327983392	1334.76104933818	1337.6835985292	Incidence	Global	Maternal hypertensive disorders
30 to 34	Female	2002	1342.8743404203	1341.41521908658	1344.33154569209	Incidence	Global	Maternal hypertensive disorders
30 to 34	Female	2003	1348.60075514084	1347.14477894021	1350.0548119462	Incidence	Global	Maternal hypertensive disorders
30 to 34	Female	2004	1355.20823939042	1353.75384303274	1356.66071153187	Incidence	Global	Maternal hypertensive disorders
30 to 34	Female	2005	1365.05681528181	1363.60069425789	1366.51100284147	Incidence	Global	Maternal hypertensive disorders
30 to 34	Female	2006	1377.67960279434	1376.21846268643	1379.13879616095	Incidence	Global	Maternal hypertensive disorders
30 to 34	Female	2007	1391.0160274209	1389.54872047013	1392.48137320029	Incidence	Global	Maternal hypertensive disorders
30 to 34	Female	2008	1404.14982862719	1402.67752481111	1405.6201577399	Incidence	Global	Maternal hypertensive disorders
30 to 34	Female	2009	1416.42252998786	1414.9483950475	1417.89467929525	Incidence	Global	Maternal hypertensive disorders
30 to 34	Female	2010	1429.87115319266	1428.39734098481	1431.3429693174	Incidence	Global	Maternal hypertensive disorders
30 to 34	Female	2011	1444.5269881406	1443.05446946601	1445.99750015692	Incidence	Global	Maternal hypertensive disorders
30 to 34	Female	2012	1456.50309479608	1455.0349644241	1457.96921215371	Incidence	Global	Maternal hypertensive disorders
30 to 34	Female	2013	1464.17395614886	1462.71423015995	1465.63166878306	Incidence	Global	Maternal hypertensive disorders
30 to 34	Female	2014	1466.69171696884	1465.24442677708	1468.13700008232	Incidence	Global	Maternal hypertensive disorders
30 to 34	Female	2015	1463.15081742494	1461.72024880944	1464.57939261498	Incidence	Global	Maternal hypertensive disorders
30 to 34	Female	2016	1452.7060145241	1451.29682988166	1454.11322754495	Incidence	Global	Maternal hypertensive disorders
30 to 34	Female	2017	1438.93492989773	1437.54795545695	1440.31995750211	Incidence	Global	Maternal hypertensive disorders
30 to 34	Female	2018	1426.89098100629	1425.52271598189	1428.25732043893	Incidence	Global	Maternal hypertensive disorders
30 to 34	Female	2019	1420.46605271246	1419.1100508058	1421.82014199582	Incidence	Global	Maternal hypertensive disorders
30 to 34	Female	2020	1413.64846239306	1412.30044213765	1414.99458025092	Incidence	Global	Maternal hypertensive disorders
30 to 34	Female	2021	1434.33138440954	1432.97330315899	1435.68754232895	Incidence	Global	Maternal hypertensive disorders
30 to 34	Female	2022	1301.40242842147	1203.73424136076	1404.66620315434	Incidence	Global	Maternal hypertensive disorders
30 to 34	Female	2023	1290.8548487311	1186.41744977712	1401.98475414771	Incidence	Global	Maternal hypertensive disorders
30 to 34	Female	2024	1281.30900567562	1166.72253345221	1404.45	Incidence	Global	Maternal hypertensive disorders
30 to 34	Female	2025	1271.16634307205	1143.26433083898	1410.34669022624	Incidence	Global	Maternal hypertensive disorders
30 to 34	Female	2026	1258.72855622379	1114.85262578348	1417.55691261807	Incidence	Global	Maternal hypertensive disorders
30 to 34	Female	2027	1242.82871793512	1081.05471311234	1424.24728049726	Incidence	Global	Maternal hypertensive disorders
30 to 34	Female	2028	1224.37565921801	1043.57299918899	1430.52265290534	Incidence	Global	Maternal hypertensive disorders
30 to 34	Female	2029	1203.93010920861	1003.54185979149	1436.40752685553	Incidence	Global	Maternal hypertensive disorders
30 to 34	Female	2030	1181.80038470314	961.664055637029	1441.88078631408	Incidence	Global	Maternal hypertensive disorders
30 to 34	Female	2031	1158.25698858924	918.48811745644	1447.01048068383	Incidence	Global	Maternal hypertensive disorders
30 to 34	Female	2032	1133.57362693465	874.55300861573	1451.84733581711	Incidence	Global	Maternal hypertensive disorders
30 to 34	Female	2033	1108.66558138039	831.001306918967	1457.02974586587	Incidence	Global	Maternal hypertensive disorders
30 to 34	Female	2034	1084.24073060353	788.505961389826	1463.32080586881	Incidence	Global	Maternal hypertensive disorders
30 to 34	Female	2035	1060.70019875598	747.258087735062	1471.46578050914	Incidence	Global	Maternal hypertensive disorders
30 to 34	Female	2036	1038.17065435824	707.096908241376	1482.14573271899	Incidence	Global	Maternal hypertensive disorders
30 to 34	Female	2037	1016.58652815673	667.739802827017	1495.85347679117	Incidence	Global	Maternal hypertensive disorders
30 to 34	Female	2038	995.973455860655	629.235079590236	1512.81275996493	Incidence	Global	Maternal hypertensive disorders
30 to 34	Female	2039	976.354131583566	591.665777963844	1533.19935703926	Incidence	Global	Maternal hypertensive disorders
30 to 34	Female	2040	957.748806461742	555.12937741283	1557.16354890452	Incidence	Global	Maternal hypertensive disorders
30 to 34	Female	2041	940.175800514352	519.724722971768	1584.84498683851	Incidence	Global	Maternal hypertensive disorders
30 to 34	Female	2042	923.65202084617	485.543753360867	1616.38285201698	Incidence	Global	Maternal hypertensive disorders
30 to 34	Female	2043	908.193481501312	452.666481323674	1651.92315947038	Incidence	Global	Maternal hypertensive disorders
30 to 34	Female	2044	893.815822711283	421.15823185218	1691.62429556055	Incidence	Global	Maternal hypertensive disorders
35 to 39	Female	1990	985.173911108581	983.696807328662	986.649525285392	Incidence	Global	Maternal hypertensive disorders
35 to 39	Female	1991	965.007737550352	963.563255220879	966.450760544987	Incidence	Global	Maternal hypertensive disorders
35 to 39	Female	1992	950.765175765635	949.345131539137	952.183781930518	Incidence	Global	Maternal hypertensive disorders
35 to 39	Female	1993	944.851873498862	943.445289789506	946.257027734671	Incidence	Global	Maternal hypertensive disorders
35 to 39	Female	1994	944.989532231195	943.588903113474	946.388731243445	Incidence	Global	Maternal hypertensive disorders
35 to 39	Female	1995	948.444191825869	947.047044546842	949.83990326245	Incidence	Global	Maternal hypertensive disorders
35 to 39	Female	1996	947.348674668711	945.962342404092	948.733572304366	Incidence	Global	Maternal hypertensive disorders
35 to 39	Female	1997	935.259308605715	933.897553153394	936.619647455863	Incidence	Global	Maternal hypertensive disorders
35 to 39	Female	1998	912.668151552674	911.34478990191	913.990130608144	Incidence	Global	Maternal hypertensive disorders
35 to 39	Female	1999	887.544486382454	886.262926146466	888.824701915702	Incidence	Global	Maternal hypertensive disorders
35 to 39	Female	2000	866.629249324359	865.384536932367	867.872648591169	Incidence	Global	Maternal hypertensive disorders
35 to 39	Female	2001	852.318727595454	851.10215746913	853.534006277399	Incidence	Global	Maternal hypertensive disorders
35 to 39	Female	2002	843.734229973083	842.538061583475	844.929120050098	Incidence	Global	Maternal hypertensive disorders
35 to 39	Female	2003	841.833453687452	840.648323345512	843.017308859103	Incidence	Global	Maternal hypertensive disorders
35 to 39	Female	2004	844.360873613065	843.181038943445	845.539429700205	Incidence	Global	Maternal hypertensive disorders
35 to 39	Female	2005	849.612769630474	848.435130369311	850.789122958345	Incidence	Global	Maternal hypertensive disorders
35 to 39	Female	2006	856.052058009187	854.876213128823	857.226608078549	Incidence	Global	Maternal hypertensive disorders
35 to 39	Female	2007	863.299409644846	862.124289057049	864.473225525305	Incidence	Global	Maternal hypertensive disorders
35 to 39	Female	2008	871.263672729568	870.088442682729	872.437587292589	Incidence	Global	Maternal hypertensive disorders
35 to 39	Female	2009	880.683628631156	879.506465502602	881.859463500679	Incidence	Global	Maternal hypertensive disorders
35 to 39	Female	2010	892.759118298873	891.576783234523	893.940108549367	Incidence	Global	Maternal hypertensive disorders
35 to 39	Female	2011	907.319474123539	906.128649764087	908.508933550163	Incidence	Global	Maternal hypertensive disorders
35 to 39	Female	2012	922.182816491119	920.982729676662	923.381517897385	Incidence	Global	Maternal hypertensive disorders
35 to 39	Female	2013	935.633080244441	934.425460108682	936.839296758357	Incidence	Global	Maternal hypertensive disorders
35 to 39	Female	2014	945.867079371229	944.656161462089	947.07658044178	Incidence	Global	Maternal hypertensive disorders
35 to 39	Female	2015	952.404415108507	951.195096050102	953.612309843511	Incidence	Global	Maternal hypertensive disorders
35 to 39	Female	2016	954.312837703803	953.109495456815	955.514754835298	Incidence	Global	Maternal hypertensive disorders
35 to 39	Female	2017	951.151261141422	949.958328915128	952.342774621982	Incidence	Global	Maternal hypertensive disorders
35 to 39	Female	2018	944.466888208666	943.287933316277	945.644435814915	Incidence	Global	Maternal hypertensive disorders
35 to 39	Female	2019	936.659600371539	935.496429637882	937.821377119319	Incidence	Global	Maternal hypertensive disorders
35 to 39	Female	2020	927.32659722075	926.181095659868	928.470720424414	Incidence	Global	Maternal hypertensive disorders
35 to 39	Female	2021	925.661685953143	924.53013604265	926.791863573755	Incidence	Global	Maternal hypertensive disorders
35 to 39	Female	2022	888.129853104354	821.656310773766	958.384543958803	Incidence	Global	Maternal hypertensive disorders
35 to 39	Female	2023	876.341080233142	805.629911710357	951.561675330434	Incidence	Global	Maternal hypertensive disorders
35 to 39	Female	2024	865.73074355855	788.507344875091	948.69204204236	Incidence	Global	Maternal hypertensive disorders
35 to 39	Female	2025	856.583901293006	770.62081917726	950.104480178812	Incidence	Global	Maternal hypertensive disorders
35 to 39	Female	2026	848.537405539121	751.809673331322	955.323493954782	Incidence	Global	Maternal hypertensive disorders
35 to 39	Female	2027	841.056026507264	731.872109243484	963.562799530787	Incidence	Global	Maternal hypertensive disorders
35 to 39	Female	2028	834.749999290876	711.791297389089	975.084691948725	Incidence	Global	Maternal hypertensive disorders
35 to 39	Female	2029	829.167226202201	691.440968485348	989.153808806844	Incidence	Global	Maternal hypertensive disorders
35 to 39	Female	2030	823.272458733867	670.121345512073	1004.44823923445	Incidence	Global	Maternal hypertensive disorders
35 to 39	Female	2031	815.963907277933	647.105752949745	1019.54248609157	Incidence	Global	Maternal hypertensive disorders
35 to 39	Female	2032	806.479817266818	622.042330374635	1033.29302720378	Incidence	Global	Maternal hypertensive disorders
35 to 39	Female	2033	795.398246855704	595.769469254961	1045.99519771462	Incidence	Global	Maternal hypertensive disorders
35 to 39	Female	2034	783.072916602026	568.808593673133	1057.83002610213	Incidence	Global	Maternal hypertensive disorders
35 to 39	Female	2035	769.696847670886	541.463178457936	1068.89041246285	Incidence	Global	Maternal hypertensive disorders
35 to 39	Female	2036	755.439705063573	513.966712232563	1079.30270088441	Incidence	Global	Maternal hypertensive disorders
35 to 39	Female	2037	740.472978262167	486.552538222597	1089.1734260069	Incidence	Global	Maternal hypertensive disorders
35 to 39	Female	2038	725.384553090706	459.784017395748	1099.06732046975	Incidence	Global	Maternal hypertensive disorders
35 to 39	Female	2039	710.631892064341	433.991027518437	1109.58636346533	Incidence	Global	Maternal hypertensive disorders
35 to 39	Female	2040	696.476387270175	409.260019207926	1121.27034109335	Incidence	Global	Maternal hypertensive disorders
35 to 39	Female	2041	683.002866968635	385.497533822275	1134.57628524694	Incidence	Global	Maternal hypertensive disorders
35 to 39	Female	2042	670.170900180689	362.539902887413	1149.82080445085	Incidence	Global	Maternal hypertensive disorders
35 to 39	Female	2043	657.997664420886	340.373149298087	1167.19709124883	Incidence	Global	Maternal hypertensive disorders
35 to 39	Female	2044	646.498989660383	318.998943296469	1186.87643197657	Incidence	Global	Maternal hypertensive disorders
40 to 44	Female	1990	468.948729803884	467.816003216267	470.08108021386	Incidence	Global	Maternal hypertensive disorders
40 to 44	Female	1991	453.021635626895	451.935075796253	454.107821162408	Incidence	Global	Maternal hypertensive disorders
40 to 44	Female	1992	441.962626394793	440.907538445342	443.017342493071	Incidence	Global	Maternal hypertensive disorders
40 to 44	Female	1993	430.117861279274	429.095801666511	431.139552525775	Incidence	Global	Maternal hypertensive disorders
40 to 44	Female	1994	422.364975736219	421.366479171529	423.363103682977	Incidence	Global	Maternal hypertensive disorders
40 to 44	Female	1995	413.298395822467	412.328887879605	414.267532834412	Incidence	Global	Maternal hypertensive disorders
40 to 44	Female	1996	405.776603643049	404.826318393178	406.726522616462	Incidence	Global	Maternal hypertensive disorders
40 to 44	Female	1997	399.761686915203	398.826702815499	400.696308518101	Incidence	Global	Maternal hypertensive disorders
40 to 44	Female	1998	396.219524128357	395.29413885926	397.14454834472	Incidence	Global	Maternal hypertensive disorders
40 to 44	Female	1999	394.68915475757	393.769388743849	395.608558407173	Incidence	Global	Maternal hypertensive disorders
40 to 44	Female	2000	394.464096914954	393.548715515041	395.379111117957	Incidence	Global	Maternal hypertensive disorders
40 to 44	Female	2001	392.822170601793	391.915614123165	393.728354914214	Incidence	Global	Maternal hypertensive disorders
40 to 44	Female	2002	387.681477509629	386.79160871534	388.570972792624	Incidence	Global	Maternal hypertensive disorders
40 to 44	Female	2003	379.230625352662	378.365308074223	380.09557067003	Incidence	Global	Maternal hypertensive disorders
40 to 44	Female	2004	370.234658247436	369.395580826763	371.073365364861	Incidence	Global	Maternal hypertensive disorders
40 to 44	Female	2005	362.74883021887	361.93302863438	363.564261281133	Incidence	Global	Maternal hypertensive disorders
40 to 44	Female	2006	357.560511935477	356.762730964197	358.357920150615	Incidence	Global	Maternal hypertensive disorders
40 to 44	Female	2007	354.320366808157	353.536037561853	355.10431948276	Incidence	Global	Maternal hypertensive disorders
40 to 44	Female	2008	353.57509452507	352.798379000317	354.351427542543	Incidence	Global	Maternal hypertensive disorders
40 to 44	Female	2009	354.564321600686	353.791508662816	355.336744235699	Incidence	Global	Maternal hypertensive disorders
40 to 44	Female	2010	356.746737231065	355.975599186641	357.517475583995	Incidence	Global	Maternal hypertensive disorders
40 to 44	Female	2011	359.134210570503	358.364712628778	359.903298915833	Incidence	Global	Maternal hypertensive disorders
40 to 44	Female	2012	361.35053542405	360.582472667989	362.118179628155	Incidence	Global	Maternal hypertensive disorders
40 to 44	Female	2013	363.412554086338	362.645771707601	364.178909752922	Incidence	Global	Maternal hypertensive disorders
40 to 44	Female	2014	365.59575733242	364.829461155417	366.36161913099	Incidence	Global	Maternal hypertensive disorders
40 to 44	Female	2015	368.397946920429	367.630545165428	369.164906268208	Incidence	Global	Maternal hypertensive disorders
40 to 44	Female	2016	370.982215763272	370.212869537706	371.75111310796	Incidence	Global	Maternal hypertensive disorders
40 to 44	Female	2017	372.350645752923	371.580206695751	373.120632503979	Incidence	Global	Maternal hypertensive disorders
40 to 44	Female	2018	372.974849381645	372.204570559001	373.744673659994	Incidence	Global	Maternal hypertensive disorders
40 to 44	Female	2019	373.414618952856	372.646088095681	374.182692164919	Incidence	Global	Maternal hypertensive disorders
40 to 44	Female	2020	373.922475193104	373.157222383178	374.687265711867	Incidence	Global	Maternal hypertensive disorders
40 to 44	Female	2021	377.035128576143	376.271345582299	377.798438462582	Incidence	Global	Maternal hypertensive disorders
40 to 44	Female	2022	386.732162988294	357.800538876637	417.277143996203	Incidence	Global	Maternal hypertensive disorders
40 to 44	Female	2023	385.794444419301	354.683133098263	418.855518481508	Incidence	Global	Maternal hypertensive disorders
40 to 44	Female	2024	383.502314103715	349.311064962383	420.198288458173	Incidence	Global	Maternal hypertensive disorders
40 to 44	Female	2025	380.088110378017	341.956900788015	421.531315849567	Incidence	Global	Maternal hypertensive disorders
40 to 44	Female	2026	375.799761178157	332.970946997536	423.032270008369	Incidence	Global	Maternal hypertensive disorders
40 to 44	Female	2027	370.992064423685	322.838707556316	424.956356391098	Incidence	Global	Maternal hypertensive disorders
40 to 44	Female	2028	366.291532189092	312.342284586023	427.78801109856	Incidence	Global	Maternal hypertensive disorders
40 to 44	Female	2029	362.114359748674	301.975122243975	431.895664230348	Incidence	Global	Maternal hypertensive disorders
40 to 44	Female	2030	358.579756340785	291.895364228249	437.402665670263	Incidence	Global	Maternal hypertensive disorders
40 to 44	Female	2031	355.536788692718	282.001542317937	444.160045633446	Incidence	Global	Maternal hypertensive disorders
40 to 44	Female	2032	352.762112871615	272.147475877682	451.911122875032	Incidence	Global	Maternal hypertensive disorders
40 to 44	Female	2033	350.510891079668	262.612254094286	460.910795223821	Incidence	Global	Maternal hypertensive disorders
40 to 44	Female	2034	348.593319695845	253.280392956272	470.911204393398	Incidence	Global	Maternal hypertensive disorders
40 to 44	Female	2035	346.574590843461	243.850550631977	481.34793857599	Incidence	Global	Maternal hypertensive disorders
40 to 44	Female	2036	343.99	234.029388546655	491.576492486946	Incidence	Global	Maternal hypertensive disorders
40 to 44	Female	2037	340.515456308523	223.669283791835	501.069421127124	Incidence	Global	Maternal hypertensive disorders
40 to 44	Female	2038	336.388868908778	213.050639004524	509.997576246008	Incidence	Global	Maternal hypertensive disorders
40 to 44	Female	2039	331.755124736398	202.345492101475	518.461268045262	Incidence	Global	Maternal hypertensive disorders
40 to 44	Female	2040	326.692233974257	191.651334096077	526.508466174571	Incidence	Global	Maternal hypertensive disorders
40 to 44	Female	2041	321.269058470301	181.041771551347	534.200308416713	Incidence	Global	Maternal hypertensive disorders
40 to 44	Female	2042	315.555315980166	170.588935006469	541.591747942721	Incidence	Global	Maternal hypertensive disorders
40 to 44	Female	2043	309.797214234663	160.476700690435	548.977666034691	Incidence	Global	Maternal hypertensive disorders
40 to 44	Female	2044	304.187975689218	150.811108345661	556.65989376364	Incidence	Global	Maternal hypertensive disorders
45 to 49	Female	1990	162.082143769024	161.344029717687	162.821183024702	Incidence	Global	Maternal hypertensive disorders
45 to 49	Female	1991	157.434050650934	156.711857301766	158.157167946909	Incidence	Global	Maternal hypertensive disorders
45 to 49	Female	1992	149.671052461837	148.978929379035	150.364080611139	Incidence	Global	Maternal hypertensive disorders
45 to 49	Female	1993	142.162086868434	141.499692365569	142.82536539288	Incidence	Global	Maternal hypertensive disorders
45 to 49	Female	1994	133.435061368659	132.808755994956	134.062218120864	Incidence	Global	Maternal hypertensive disorders
45 to 49	Female	1995	127.535226721634	126.934848735309	128.136427523008	Incidence	Global	Maternal hypertensive disorders
45 to 49	Female	1996	122.874219956571	122.298825943376	123.450392487788	Incidence	Global	Maternal hypertensive disorders
45 to 49	Female	1997	119.33972036128	118.781963509456	119.898	Incidence	Global	Maternal hypertensive disorders
45 to 49	Female	1998	115.317468144918	114.778936497437	115.856723774308	Incidence	Global	Maternal hypertensive disorders
45 to 49	Female	1999	112.358145540049	111.833989614822	112.883004334168	Incidence	Global	Maternal hypertensive disorders
45 to 49	Female	2000	108.873579456914	108.367239212907	109.380592915558	Incidence	Global	Maternal hypertensive disorders
45 to 49	Female	2001	106.322369608631	105.827699377362	106.817697975558	Incidence	Global	Maternal hypertensive disorders
45 to 49	Female	2002	104.651742926854	104.165617024726	105.138512824377	Incidence	Global	Maternal hypertensive disorders
45 to 49	Female	2003	103.850428895513	103.369411008518	104.332079352481	Incidence	Global	Maternal hypertensive disorders
45 to 49	Female	2004	103.481706239289	103.003959043892	103.960076583232	Incidence	Global	Maternal hypertensive disorders
45 to 49	Female	2005	103.059185170777	102.584940709802	103.534043181357	Incidence	Global	Maternal hypertensive disorders
45 to 49	Female	2006	101.876352449133	101.408756961825	102.344548870234	Incidence	Global	Maternal hypertensive disorders
45 to 49	Female	2007	99.6808193385704	99.2241456998965	100.138076869091	Incidence	Global	Maternal hypertensive disorders
45 to 49	Female	2008	96.6645855429727	96.2227973809197	97.1069345737006	Incidence	Global	Maternal hypertensive disorders
45 to 49	Female	2009	93.5949651318008	93.1686711581311	94.0217949124817	Incidence	Global	Maternal hypertensive disorders
45 to 49	Female	2010	91.1014340213254	90.6885801323643	91.514799467146	Incidence	Global	Maternal hypertensive disorders
45 to 49	Female	2011	89.2388021419461	88.8364903332626	89.6416051389706	Incidence	Global	Maternal hypertensive disorders
45 to 49	Female	2012	87.6010378058283	87.2075132939283	87.9950376758283	Incidence	Global	Maternal hypertensive disorders
45 to 49	Female	2013	86.4050224928544	86.0176742712548	86.7928354727346	Incidence	Global	Maternal hypertensive disorders
45 to 49	Female	2014	85.5510224961541	85.1681065519979	85.9343953561143	Incidence	Global	Maternal hypertensive disorders
45 to 49	Female	2015	84.988671917574	84.6090563001188	85.3687374117416	Incidence	Global	Maternal hypertensive disorders
45 to 49	Female	2016	84.1747226958109	83.7990719750214	84.5508168900745	Incidence	Global	Maternal hypertensive disorders
45 to 49	Female	2017	83.0351362931977	82.6639346185983	83.4067775426279	Incidence	Global	Maternal hypertensive disorders
45 to 49	Female	2018	81.8880312630262	81.5211023533965	82.2553967220014	Incidence	Global	Maternal hypertensive disorders
45 to 49	Female	2019	81.1645322255453	80.8005741256517	81.5289235203634	Incidence	Global	Maternal hypertensive disorders
45 to 49	Female	2020	80.8286517558338	80.4662775231079	81.191456358473	Incidence	Global	Maternal hypertensive disorders
45 to 49	Female	2021	81.301030980454	80.9378453198393	81.6646435118789	Incidence	Global	Maternal hypertensive disorders
45 to 49	Female	2022	94.7728745837833	87.6854974057092	102.259499650467	Incidence	Global	Maternal hypertensive disorders
45 to 49	Female	2023	96.3671770971413	88.596396469871	104.62714520552	Incidence	Global	Maternal hypertensive disorders
45 to 49	Female	2024	97.6731821146646	88.9644174625779	107.023756362444	Incidence	Global	Maternal hypertensive disorders
45 to 49	Female	2025	98.6255616354684	88.7303513599021	109.387116588969	Incidence	Global	Maternal hypertensive disorders
45 to 49	Female	2026	99.2056464716829	87.8982349682225	111.684201203578	Incidence	Global	Maternal hypertensive disorders
45 to 49	Female	2027	99.4082434823652	86.5035716515752	113.877700702441	Incidence	Global	Maternal hypertensive disorders
45 to 49	Female	2028	99.2279033044276	84.6106459075384	115.894968089186	Incidence	Global	Maternal hypertensive disorders
45 to 49	Female	2029	98.7086271481859	82.3116857097119	117.735633943325	Incidence	Global	Maternal hypertensive disorders
45 to 49	Female	2030	97.909395983282	79.6965117858214	119.434099544867	Incidence	Global	Maternal hypertensive disorders
45 to 49	Female	2031	96.8934100285304	76.8474321675165	121.043676173123	Incidence	Global	Maternal hypertensive disorders
45 to 49	Female	2032	95.751537389498	73.8640357186787	122.656939363777	Incidence	Global	Maternal hypertensive disorders
45 to 49	Female	2033	94.6446	70.9047551373128	124.443906098258	Incidence	Global	Maternal hypertensive disorders
45 to 49	Female	2034	93.6798896816678	68.0621498829546	126.538470710507	Incidence	Global	Maternal hypertensive disorders
45 to 49	Female	2035	92.8885908341807	65.356763944446	128.998049536203	Incidence	Global	Maternal hypertensive disorders
45 to 49	Female	2036	92.2322673448412	62.7543710832854	131.795051351941	Incidence	Global	Maternal hypertensive disorders
45 to 49	Female	2037	91.6534627290272	60.2133298274601	134.866649741539	Incidence	Global	Maternal hypertensive disorders
45 to 49	Female	2038	91.2184388228005	57.7865186912957	138.303603685794	Incidence	Global	Maternal hypertensive disorders
45 to 49	Female	2039	90.8781669217312	55.4423738114258	142.04151637282	Incidence	Global	Maternal hypertensive disorders
45 to 49	Female	2040	90.5195589063018	53.1112446105589	145.915494124829	Incidence	Global	Maternal hypertensive disorders
45 to 49	Female	2041	90.0210457014937	50.7272696025878	149.731741344601	Incidence	Global	Maternal hypertensive disorders
45 to 49	Female	2042	89.2968213985474	48.2572441302952	153.329207607565	Incidence	Global	Maternal hypertensive disorders
45 to 49	Female	2043	88.4075016777058	45.7598817551863	156.761512671771	Incidence	Global	Maternal hypertensive disorders
45 to 49	Female	2044	87.3897561350755	43.2707277536456	160.059081760538	Incidence	Global	Maternal hypertensive disorders
15 to 19	Female	1990	807.167073302922	806.065389251833	808.267537216998	Incidence	Global	Maternal obstructed labor and uterine rupture
15 to 19	Female	1991	782.330353120937	781.245228123205	783.414294066728	Incidence	Global	Maternal obstructed labor and uterine rupture
15 to 19	Female	1992	760.705	759.634465400213	761.774856695513	Incidence	Global	Maternal obstructed labor and uterine rupture
15 to 19	Female	1993	742.222936829795	741.165351759072	743.279397415283	Incidence	Global	Maternal obstructed labor and uterine rupture
15 to 19	Female	1994	726.697702678994	725.653131912694	727.741172450099	Incidence	Global	Maternal obstructed labor and uterine rupture
15 to 19	Female	1995	714.948188229468	713.916117642856	715.979175668127	Incidence	Global	Maternal obstructed labor and uterine rupture
15 to 19	Female	1996	704.407743216129	703.388874877286	705.425544411251	Incidence	Global	Maternal obstructed labor and uterine rupture
15 to 19	Female	1997	691.906136106052	690.903014047085	692.908210011307	Incidence	Global	Maternal obstructed labor and uterine rupture
15 to 19	Female	1998	678.02116471593	677.035890830176	679.005411542702	Incidence	Global	Maternal obstructed labor and uterine rupture
15 to 19	Female	1999	663.569760458458	662.603647999884	664.534867806052	Incidence	Global	Maternal obstructed labor and uterine rupture
15 to 19	Female	2000	649.524427889566	648.577977523872	650.469894446447	Incidence	Global	Maternal obstructed labor and uterine rupture
15 to 19	Female	2001	634.561855668225	633.636602644453	635.486147567294	Incidence	Global	Maternal obstructed labor and uterine rupture
15 to 19	Female	2002	618.420893827777	617.517422226713	619.323428818385	Incidence	Global	Maternal obstructed labor and uterine rupture
15 to 19	Female	2003	603.03112112339	602.147455001068	603.913874062269	Incidence	Global	Maternal obstructed labor and uterine rupture
15 to 19	Female	2004	589.631109307929	588.763698621179	590.497627283165	Incidence	Global	Maternal obstructed labor and uterine rupture
15 to 19	Female	2005	578.943412542029	578.087780765568	579.798168041503	Incidence	Global	Maternal obstructed labor and uterine rupture
15 to 19	Female	2006	570.24230468767	569.394165194325	571.08958148691	Incidence	Global	Maternal obstructed labor and uterine rupture
15 to 19	Female	2007	561.727024239744	560.884197871621	562.569001483046	Incidence	Global	Maternal obstructed labor and uterine rupture
15 to 19	Female	2008	553.199994820847	552.361216469911	554.03793793825	Incidence	Global	Maternal obstructed labor and uterine rupture
15 to 19	Female	2009	544.525425705658	543.690166436883	545.359864177291	Incidence	Global	Maternal obstructed labor and uterine rupture
15 to 19	Female	2010	535.661517729937	534.829751472123	536.492478228352	Incidence	Global	Maternal obstructed labor and uterine rupture
15 to 19	Female	2011	524.161978656794	523.336644383089	524.986526700866	Incidence	Global	Maternal obstructed labor and uterine rupture
15 to 19	Female	2012	508.902986565949	508.088240836324	509.716972048976	Incidence	Global	Maternal obstructed labor and uterine rupture
15 to 19	Female	2013	491.614905725396	490.813242465851	492.41583852586	Incidence	Global	Maternal obstructed labor and uterine rupture
15 to 19	Female	2014	474.064402955778	473.276736072424	474.851370079076	Incidence	Global	Maternal obstructed labor and uterine rupture
15 to 19	Female	2015	457.929049670937	457.154984389567	458.702443771587	Incidence	Global	Maternal obstructed labor and uterine rupture
15 to 19	Female	2016	441.707945432231	440.948163352461	442.467085412647	Incidence	Global	Maternal obstructed labor and uterine rupture
15 to 19	Female	2017	423.793786888229	423.050493490673	424.536470680767	Incidence	Global	Maternal obstructed labor and uterine rupture
15 to 19	Female	2018	406.036551372375	405.310586483021	406.761939114884	Incidence	Global	Maternal obstructed labor and uterine rupture
15 to 19	Female	2019	390.293377192268	389.583933563663	391.002272424892	Incidence	Global	Maternal obstructed labor and uterine rupture
15 to 19	Female	2020	376.218386525257	375.524778013669	376.911472166548	Incidence	Global	Maternal obstructed labor and uterine rupture
15 to 19	Female	2021	365.981502650566	365.301119893636	366.661380271503	Incidence	Global	Maternal obstructed labor and uterine rupture
15 to 19	Female	2022	353.082935169546	315.278690962042	394.000544505319	Incidence	Global	Maternal obstructed labor and uterine rupture
15 to 19	Female	2023	340.741629516776	298.847562152468	386.610722621413	Incidence	Global	Maternal obstructed labor and uterine rupture
15 to 19	Female	2024	328.924892370987	281.749384039533	381.40850390727	Incidence	Global	Maternal obstructed labor and uterine rupture
15 to 19	Female	2025	317.627448722197	264.387940901392	378.050213078098	Incidence	Global	Maternal obstructed labor and uterine rupture
15 to 19	Female	2026	306.842622781144	247.106363260958	376.231649166239	Incidence	Global	Maternal obstructed labor and uterine rupture
15 to 19	Female	2027	296.56259070788	230.160657654109	375.720806225928	Incidence	Global	Maternal obstructed labor and uterine rupture
15 to 19	Female	2028	286.778609866658	213.730532778093	376.351377528355	Incidence	Global	Maternal obstructed labor and uterine rupture
15 to 19	Female	2029	277.481222206377	197.938	378.007217615946	Incidence	Global	Maternal obstructed labor and uterine rupture
15 to 19	Female	2030	268.660439895101	182.861055926138	380.608473701447	Incidence	Global	Maternal obstructed labor and uterine rupture
15 to 19	Female	2031	260.305916836141	168.549241957591	384.101439217163	Incidence	Global	Maternal obstructed labor and uterine rupture
15 to 19	Female	2032	252.407107230823	155.027884574354	388.451607187788	Incidence	Global	Maternal obstructed labor and uterine rupture
15 to 19	Female	2033	244.953413552354	142.305918666217	393.639011453731	Incidence	Global	Maternal obstructed labor and uterine rupture
15 to 19	Female	2034	237.934323791565	130.379707155791	399.655107358263	Incidence	Global	Maternal obstructed labor and uterine rupture
15 to 19	Female	2035	231.339538964338	119.236161279839	406.500673910617	Incidence	Global	Maternal obstructed labor and uterine rupture
15 to 19	Female	2036	225.159092195863	108.855104106343	414.184399639939	Incidence	Global	Maternal obstructed labor and uterine rupture
15 to 19	Female	2037	219.383460648509	99.2111	422.721933732793	Incidence	Global	Maternal obstructed labor and uterine rupture
15 to 19	Female	2038	214.003671634143	90.2748876071398	432.135261157067	Incidence	Global	Maternal obstructed labor and uterine rupture
15 to 19	Female	2039	209.011404349932	82.0145360962793	442.452312553617	Incidence	Global	Maternal obstructed labor and uterine rupture
15 to 19	Female	2040	204.399088775641	74.3963557981058	453.706746642637	Incidence	Global	Maternal obstructed labor and uterine rupture
15 to 19	Female	2041	200.16000337373	67.3856469461731	465.937866177574	Incidence	Global	Maternal obstructed labor and uterine rupture
15 to 19	Female	2042	196.288373358087	60.9472996051723	479.190640569978	Incidence	Global	Maternal obstructed labor and uterine rupture
15 to 19	Female	2043	192.779471410632	55.0462781490178	493.515817615526	Incidence	Global	Maternal obstructed labor and uterine rupture
15 to 19	Female	2044	189.629722893031	49.6480094486559	508.97011266211	Incidence	Global	Maternal obstructed labor and uterine rupture
20 to 24	Female	1990	2348.31596633692	2346.39293267558	2350.2360948654	Incidence	Global	Maternal obstructed labor and uterine rupture
20 to 24	Female	1991	2277.42012975784	2275.53425084572	2279.30317244327	Incidence	Global	Maternal obstructed labor and uterine rupture
20 to 24	Female	1992	2210.80013836315	2208.94823164323	2212.64927304549	Incidence	Global	Maternal obstructed labor and uterine rupture
20 to 24	Female	1993	2150.49701249767	2148.67562034253	2152.31569078819	Incidence	Global	Maternal obstructed labor and uterine rupture
20 to 24	Female	1994	2098.54784691238	2096.75209977962	2100.34092997993	Incidence	Global	Maternal obstructed labor and uterine rupture
20 to 24	Female	1995	2056.94875014428	2055.17297988362	2058.72189592366	Incidence	Global	Maternal obstructed labor and uterine rupture
20 to 24	Female	1996	2020.31144956385	2018.55217863474	2022.06813011504	Incidence	Global	Maternal obstructed labor and uterine rupture
20 to 24	Female	1997	1983.48576771911	1981.7427025232	1985.22627668068	Incidence	Global	Maternal obstructed labor and uterine rupture
20 to 24	Female	1998	1948.57646361711	1946.85025354157	1950.30015120882	Incidence	Global	Maternal obstructed labor and uterine rupture
20 to 24	Female	1999	1916.94400666357	1915.23634912736	1918.64917504937	Incidence	Global	Maternal obstructed labor and uterine rupture
20 to 24	Female	2000	1890.00600721048	1888.3181777486	1891.69137917047	Incidence	Global	Maternal obstructed labor and uterine rupture
20 to 24	Female	2001	1863.5366104652	1861.87053640898	1865.20025993684	Incidence	Global	Maternal obstructed labor and uterine rupture
20 to 24	Female	2002	1833.08154971411	1831.44084435447	1834.71986863448	Incidence	Global	Maternal obstructed labor and uterine rupture
20 to 24	Female	2003	1800.32930069159	1798.71692745729	1801.93932934465	Incidence	Global	Maternal obstructed labor and uterine rupture
20 to 24	Female	2004	1766.87069934597	1765.28868446508	1768.45041353035	Incidence	Global	Maternal obstructed labor and uterine rupture
20 to 24	Female	2005	1734.21395153325	1732.66348721856	1735.76215951084	Incidence	Global	Maternal obstructed labor and uterine rupture
20 to 24	Female	2006	1694.92593675563	1693.41149415458	1696.43817484889	Incidence	Global	Maternal obstructed labor and uterine rupture
20 to 24	Female	2007	1645.51180935076	1644.03728144828	1646.98419364659	Incidence	Global	Maternal obstructed labor and uterine rupture
20 to 24	Female	2008	1593.45064660647	1592.0148299597	1594.8843811992	Incidence	Global	Maternal obstructed labor and uterine rupture
20 to 24	Female	2009	1548.02135809559	1546.61764056316	1549.42304602899	Incidence	Global	Maternal obstructed labor and uterine rupture
20 to 24	Female	2010	1519.01226556565	1517.62822413259	1520.39431030591	Incidence	Global	Maternal obstructed labor and uterine rupture
20 to 24	Female	2011	1501.93484047966	1500.55955585942	1503.30814564072	Incidence	Global	Maternal obstructed labor and uterine rupture
20 to 24	Female	2012	1484.92974299168	1483.55959334433	1486.29792767977	Incidence	Global	Maternal obstructed labor and uterine rupture
20 to 24	Female	2013	1467.68441207175	1466.32	1469.0495922157	Incidence	Global	Maternal obstructed labor and uterine rupture
20 to 24	Female	2014	1449.4117762702	1448.04709317326	1450.77452122554	Incidence	Global	Maternal obstructed labor and uterine rupture
20 to 24	Female	2015	1429.29780674345	1427.93662946812	1430.65706170668	Incidence	Global	Maternal obstructed labor and uterine rupture
20 to 24	Female	2016	1401.19179936859	1399.8398860289	1402.54181594616	Incidence	Global	Maternal obstructed labor and uterine rupture
20 to 24	Female	2017	1363.7203336925	1362.38427942524	1365.05452812532	Incidence	Global	Maternal obstructed labor and uterine rupture
20 to 24	Female	2018	1322.74470871424	1321.42769800549	1324.05990160821	Incidence	Global	Maternal obstructed labor and uterine rupture
20 to 24	Female	2019	1284.0434545043	1282.74555237733	1285.33957968897	Incidence	Global	Maternal obstructed labor and uterine rupture
20 to 24	Female	2020	1246.54234458705	1245.26415718197	1247.81879581561	Incidence	Global	Maternal obstructed labor and uterine rupture
20 to 24	Female	2021	1213.20997871018	1211.95002556653	1214.46823267553	Incidence	Global	Maternal obstructed labor and uterine rupture
20 to 24	Female	2022	1186.37630879724	1077.95442154832	1302.41898795884	Incidence	Global	Maternal obstructed labor and uterine rupture
20 to 24	Female	2023	1144.81398438228	1033.44622526775	1264.53744371668	Incidence	Global	Maternal obstructed labor and uterine rupture
20 to 24	Female	2024	1104.50099776867	987.352625558755	1231.31221452125	Incidence	Global	Maternal obstructed labor and uterine rupture
20 to 24	Female	2025	1065.70158489869	939.690775103281	1203.45559072473	Incidence	Global	Maternal obstructed labor and uterine rupture
20 to 24	Female	2026	1028.51688808481	890.464435784529	1181.41838365083	Incidence	Global	Maternal obstructed labor and uterine rupture
20 to 24	Female	2027	992.900422803556	839.890309102678	1165.17605790592	Incidence	Global	Maternal obstructed labor and uterine rupture
20 to 24	Female	2028	958.837561847585	788.806496463251	1154.06366343094	Incidence	Global	Maternal obstructed labor and uterine rupture
20 to 24	Female	2029	926.30948469892	738.006340788689	1147.41931502297	Incidence	Global	Maternal obstructed labor and uterine rupture
20 to 24	Female	2030	895.293852443026	688.13799837121	1144.68716860887	Incidence	Global	Maternal obstructed labor and uterine rupture
20 to 24	Female	2031	865.765442441057	639.692301679541	1145.43517547518	Incidence	Global	Maternal obstructed labor and uterine rupture
20 to 24	Female	2032	837.696752840437	593.023191862284	1149.34081790563	Incidence	Global	Maternal obstructed labor and uterine rupture
20 to 24	Female	2033	811.058568456157	548.374682427027	1156.16982767881	Incidence	Global	Maternal obstructed labor and uterine rupture
20 to 24	Female	2034	785.820486553614	505.90519353571	1165.75687190336	Incidence	Global	Maternal obstructed labor and uterine rupture
20 to 24	Female	2035	761.951404598217	465.707175254919	1177.99037545218	Incidence	Global	Maternal obstructed labor and uterine rupture
20 to 24	Female	2036	739.419972215573	427.822336689379	1192.80127514044	Incidence	Global	Maternal obstructed labor and uterine rupture
20 to 24	Female	2037	718.195010303948	392.253367754245	1210.15490217153	Incidence	Global	Maternal obstructed labor and uterine rupture
20 to 24	Female	2038	698.245900573824	358.973006497095	1230.04519625527	Incidence	Global	Maternal obstructed labor and uterine rupture
20 to 24	Female	2039	679.542949074881	327.931125419596	1252.49061809139	Incidence	Global	Maternal obstructed labor and uterine rupture
20 to 24	Female	2040	662.057727537579	299.060333032848	1277.53129621116	Incidence	Global	Maternal obstructed labor and uterine rupture
20 to 24	Female	2041	645.763396612431	272.280447822031	1305.22707957233	Incidence	Global	Maternal obstructed labor and uterine rupture
20 to 24	Female	2042	630.635015347538	247.502101195982	1335.65626642233	Incidence	Global	Maternal obstructed labor and uterine rupture
20 to 24	Female	2043	616.649841515868	224.629655506798	1368.91484998049	Incidence	Global	Maternal obstructed labor and uterine rupture
20 to 24	Female	2044	603.787627699176	203.563574303539	1405.11617028001	Incidence	Global	Maternal obstructed labor and uterine rupture
25 to 29	Female	1990	2036.20317846012	2034.3173540279	2038.08630325733	Incidence	Global	Maternal obstructed labor and uterine rupture
25 to 29	Female	1991	1977.0550086268	1975.2232644427	1978.8841310693	Incidence	Global	Maternal obstructed labor and uterine rupture
25 to 29	Female	1992	1921.39783364715	1919.61314862541	1923.17996736759	Incidence	Global	Maternal obstructed labor and uterine rupture
25 to 29	Female	1993	1872.78741686752	1871.03930790977	1874.53303271542	Incidence	Global	Maternal obstructed labor and uterine rupture
25 to 29	Female	1994	1832.87227481716	1831.15228125686	1834.58982169244	Incidence	Global	Maternal obstructed labor and uterine rupture
25 to 29	Female	1995	1802.42209647087	1800.72373006403	1804.11805178501	Incidence	Global	Maternal obstructed labor and uterine rupture
25 to 29	Female	1996	1774.80483835655	1773.12709561684	1776.48020304598	Incidence	Global	Maternal obstructed labor and uterine rupture
25 to 29	Female	1997	1744.43320739935	1742.77666613041	1746.08740592884	Incidence	Global	Maternal obstructed labor and uterine rupture
25 to 29	Female	1998	1713.27018320699	1711.63476554733	1714.90329396501	Incidence	Global	Maternal obstructed labor and uterine rupture
25 to 29	Female	1999	1684.11872164193	1682.50237250607	1685.73279697484	Incidence	Global	Maternal obstructed labor and uterine rupture
25 to 29	Female	2000	1660.72585960891	1659.1241758274	1662.32529575758	Incidence	Global	Maternal obstructed labor and uterine rupture
25 to 29	Female	2001	1639.75846138599	1638.16825723118	1641.34644027048	Incidence	Global	Maternal obstructed labor and uterine rupture
25 to 29	Female	2002	1617.49219128545	1615.91337535927	1619.06880522368	Incidence	Global	Maternal obstructed labor and uterine rupture
25 to 29	Female	2003	1595.76353690407	1594.19695465314	1597.32794072787	Incidence	Global	Maternal obstructed labor and uterine rupture
25 to 29	Female	2004	1575.82059769999	1574.26818897065	1577.37085163764	Incidence	Global	Maternal obstructed labor and uterine rupture
25 to 29	Female	2005	1559.56735523188	1558.03049642615	1561.10208116548	Incidence	Global	Maternal obstructed labor and uterine rupture
25 to 29	Female	2006	1541.49185416216	1539.97344888181	1543.00815171431	Incidence	Global	Maternal obstructed labor and uterine rupture
25 to 29	Female	2007	1516.88781485136	1515.39274714223	1518.38080788057	Incidence	Global	Maternal obstructed labor and uterine rupture
25 to 29	Female	2008	1489.92854859184	1488.45992849409	1491.39513079908	Incidence	Global	Maternal obstructed labor and uterine rupture
25 to 29	Female	2009	1465.11063558427	1463.6689036851	1466.55036514111	Incidence	Global	Maternal obstructed labor and uterine rupture
25 to 29	Female	2010	1447.49869193374	1446.08107523791	1448.91433487624	Incidence	Global	Maternal obstructed labor and uterine rupture
25 to 29	Female	2011	1439.32958856456	1437.93244667537	1440.72477627408	Incidence	Global	Maternal obstructed labor and uterine rupture
25 to 29	Female	2012	1438.74950335257	1437.36856289329	1440.12850121952	Incidence	Global	Maternal obstructed labor and uterine rupture
25 to 29	Female	2013	1442.50711345085	1441.13775108272	1443.87453888041	Incidence	Global	Maternal obstructed labor and uterine rupture
25 to 29	Female	2014	1445.73472100957	1444.37338322234	1447.09412550734	Incidence	Global	Maternal obstructed labor and uterine rupture
25 to 29	Female	2015	1442.37538720697	1441.02062083978	1443.72822725752	Incidence	Global	Maternal obstructed labor and uterine rupture
25 to 29	Female	2016	1430.46056424021	1429.11129982763	1431.8079141219	Incidence	Global	Maternal obstructed labor and uterine rupture
25 to 29	Female	2017	1413.83657917968	1412.4915721231	1415.17968576914	Incidence	Global	Maternal obstructed labor and uterine rupture
25 to 29	Female	2018	1396.45804727573	1395.11573752464	1397.7984701898	Incidence	Global	Maternal obstructed labor and uterine rupture
25 to 29	Female	2019	1382.03123360716	1380.68960144934	1383.37098933681	Incidence	Global	Maternal obstructed labor and uterine rupture
25 to 29	Female	2020	1366.01795300864	1364.67829908093	1367.35574310194	Incidence	Global	Maternal obstructed labor and uterine rupture
25 to 29	Female	2021	1366.67954196299	1365.33589611763	1368.02132085861	Incidence	Global	Maternal obstructed labor and uterine rupture
25 to 29	Female	2022	1266.89803292339	1151.57670784346	1390.18200424205	Incidence	Global	Maternal obstructed labor and uterine rupture
25 to 29	Female	2023	1230.31787239327	1111.03506429137	1358.44383458794	Incidence	Global	Maternal obstructed labor and uterine rupture
25 to 29	Female	2024	1192.23634684303	1066.43799899614	1328.25470450587	Incidence	Global	Maternal obstructed labor and uterine rupture
25 to 29	Female	2025	1153.64055302063	1018.99230960876	1300.49013081236	Incidence	Global	Maternal obstructed labor and uterine rupture
25 to 29	Female	2026	1115.19049644711	969.777669653917	1275.50983434572	Incidence	Global	Maternal obstructed labor and uterine rupture
25 to 29	Female	2027	1077.29431681897	919.736504932766	1253.2893142264	Incidence	Global	Maternal obstructed labor and uterine rupture
25 to 29	Female	2028	1040.25338183786	869.800125768778	1233.54262226092	Incidence	Global	Maternal obstructed labor and uterine rupture
25 to 29	Female	2029	1004.40525903446	820.60480331937	1216.37578398994	Incidence	Global	Maternal obstructed labor and uterine rupture
25 to 29	Female	2030	969.981486866592	772.417547120497	1202.10412807357	Incidence	Global	Maternal obstructed labor and uterine rupture
25 to 29	Female	2031	937.069176092864	725.244281842141	1191.08477138779	Incidence	Global	Maternal obstructed labor and uterine rupture
25 to 29	Female	2032	905.622287106622	679.026266423264	1183.50479962306	Incidence	Global	Maternal obstructed labor and uterine rupture
25 to 29	Female	2033	875.621845906226	633.990970227766	1179.2289415591	Incidence	Global	Maternal obstructed labor and uterine rupture
25 to 29	Female	2034	847.045966690945	590.358170573286	1178.10652908508	Incidence	Global	Maternal obstructed labor and uterine rupture
25 to 29	Female	2035	819.870396479974	548.319059573953	1179.99483406748	Incidence	Global	Maternal obstructed labor and uterine rupture
25 to 29	Female	2036	794.069061929807	508.027920427866	1184.76963169519	Incidence	Global	Maternal obstructed labor and uterine rupture
25 to 29	Female	2037	769.614589109933	469.600419123428	1192.32954408788	Incidence	Global	Maternal obstructed labor and uterine rupture
25 to 29	Female	2038	746.478787154595	433.115357851843	1202.59734162584	Incidence	Global	Maternal obstructed labor and uterine rupture
25 to 29	Female	2039	724.63309619501	398.618164303101	1215.51973272492	Incidence	Global	Maternal obstructed labor and uterine rupture
25 to 29	Female	2040	704.049001101901	366.12512288731	1231.06643550574	Incidence	Global	Maternal obstructed labor and uterine rupture
25 to 29	Female	2041	684.698418813808	335.62777028579	1249.22898701694	Incidence	Global	Maternal obstructed labor and uterine rupture
25 to 29	Female	2042	666.554062686654	307.097120382288	1270.01954365663	Incidence	Global	Maternal obstructed labor and uterine rupture
25 to 29	Female	2043	649.589783376026	280.487548996131	1293.46980604107	Incidence	Global	Maternal obstructed labor and uterine rupture
25 to 29	Female	2044	633.780893648552	255.740265043776	1319.63014871591	Incidence	Global	Maternal obstructed labor and uterine rupture
30 to 34	Female	1990	1216.78151709917	1215.21322864435	1218.34798040613	Incidence	Global	Maternal obstructed labor and uterine rupture
30 to 34	Female	1991	1203.30314640036	1201.75446902607	1204.85001933064	Incidence	Global	Maternal obstructed labor and uterine rupture
30 to 34	Female	1992	1184.11629765369	1182.59684544823	1185.63397518292	Incidence	Global	Maternal obstructed labor and uterine rupture
30 to 34	Female	1993	1158.57000324788	1157.09061127092	1160.04766047728	Incidence	Global	Maternal obstructed labor and uterine rupture
30 to 34	Female	1994	1132.50734826171	1131.07006994929	1133.94293293317	Incidence	Global	Maternal obstructed labor and uterine rupture
30 to 34	Female	1995	1110.17658046773	1108.77701953787	1111.57448347755	Incidence	Global	Maternal obstructed labor and uterine rupture
30 to 34	Female	1996	1090.69681217475	1089.32911567127	1092.06288174331	Incidence	Global	Maternal obstructed labor and uterine rupture
30 to 34	Female	1997	1072.48902881927	1071.14841551202	1073.82804348653	Incidence	Global	Maternal obstructed labor and uterine rupture
30 to 34	Female	1998	1057.71028620321	1056.38936317178	1059.02963295462	Incidence	Global	Maternal obstructed labor and uterine rupture
30 to 34	Female	1999	1046.20676932766	1044.90044028502	1047.51153929689	Incidence	Global	Maternal obstructed labor and uterine rupture
30 to 34	Female	2000	1038.42016381294	1037.12472171336	1039.7140587621	Incidence	Global	Maternal obstructed labor and uterine rupture
30 to 34	Female	2001	1032.99881635255	1031.71320738323	1034.28288709924	Incidence	Global	Maternal obstructed labor and uterine rupture
30 to 34	Female	2002	1027.02411637456	1025.74813233025	1028.29857170986	Incidence	Global	Maternal obstructed labor and uterine rupture
30 to 34	Female	2003	1020.73070496668	1019.46408019921	1021.9958108323	Incidence	Global	Maternal obstructed labor and uterine rupture
30 to 34	Female	2004	1014.7912022715	1013.53272203187	1016.04817267168	Incidence	Global	Maternal obstructed labor and uterine rupture
30 to 34	Female	2005	1010.70003643109	1009.44715492824	1011.9514143354	Incidence	Global	Maternal obstructed labor and uterine rupture
30 to 34	Female	2006	1005.38519647194	1004.13706926569	1006.63182746806	Incidence	Global	Maternal obstructed labor and uterine rupture
30 to 34	Female	2007	997.579732124308	996.337218169496	998.820760344299	Incidence	Global	Maternal obstructed labor and uterine rupture
30 to 34	Female	2008	989.63539233134	988.399449423959	990.869860423611	Incidence	Global	Maternal obstructed labor and uterine rupture
30 to 34	Female	2009	983.866527242435	982.638021543805	985.093566785428	Incidence	Global	Maternal obstructed labor and uterine rupture
30 to 34	Female	2010	983.209849589842	981.987813346285	984.430422217514	Incidence	Global	Maternal obstructed labor and uterine rupture
30 to 34	Female	2011	989.124461017965	987.906059392042	990.341393397691	Incidence	Global	Maternal obstructed labor and uterine rupture
30 to 34	Female	2012	997.819787703404	996.604714078627	999.033	Incidence	Global	Maternal obstructed labor and uterine rupture
30 to 34	Female	2013	1006.02304667571	1004.81315302001	1007.2314553222	Incidence	Global	Maternal obstructed labor and uterine rupture
30 to 34	Female	2014	1010.76439895962	1009.56301939763	1011.96429149138	Incidence	Global	Maternal obstructed labor and uterine rupture
30 to 34	Female	2015	1009.62374980392	1008.43548450359	1010.81	Incidence	Global	Maternal obstructed labor and uterine rupture
30 to 34	Female	2016	1003.47917676322	1002.30805260267	1004.64883273353	Incidence	Global	Maternal obstructed labor and uterine rupture
30 to 34	Female	2017	996.192457653022	995.038500532685	997.344960696871	Incidence	Global	Maternal obstructed labor and uterine rupture
30 to 34	Female	2018	989.236704399205	988.097517166711	990.374450460445	Incidence	Global	Maternal obstructed labor and uterine rupture
30 to 34	Female	2019	983.814277851168	982.685856019265	984.941268305881	Incidence	Global	Maternal obstructed labor and uterine rupture
30 to 34	Female	2020	976.417423806129	975.297179162596	977.536247705654	Incidence	Global	Maternal obstructed labor and uterine rupture
30 to 34	Female	2021	988.943826284717	987.816224745318	990.069991854466	Incidence	Global	Maternal obstructed labor and uterine rupture
30 to 34	Female	2022	900.849811082739	819.280483127193	988.069855859228	Incidence	Global	Maternal obstructed labor and uterine rupture
30 to 34	Female	2023	888.023341080274	802.339137439069	980.06192936478	Incidence	Global	Maternal obstructed labor and uterine rupture
30 to 34	Female	2024	873.816893628316	781.953426054763	973.164463952188	Incidence	Global	Maternal obstructed labor and uterine rupture
30 to 34	Female	2025	857.602563381288	757.701239834877	966.623825555777	Incidence	Global	Maternal obstructed labor and uterine rupture
30 to 34	Female	2026	838.855231002939	729.465254298192	959.579686430358	Incidence	Global	Maternal obstructed labor and uterine rupture
30 to 34	Female	2027	817.518134239338	697.69710696759	951.518510962703	Incidence	Global	Maternal obstructed labor and uterine rupture
30 to 34	Female	2028	794.461343086074	663.777069728141	942.805455887771	Incidence	Global	Maternal obstructed labor and uterine rupture
30 to 34	Female	2029	770.48730391941	628.862389827805	933.911599933557	Incidence	Global	Maternal obstructed labor and uterine rupture
30 to 34	Female	2030	746.223462228271	593.798962530108	925.276785483477	Incidence	Global	Maternal obstructed labor and uterine rupture
30 to 34	Female	2031	722.088804536603	559.146670575837	917.210153318483	Incidence	Global	Maternal obstructed labor and uterine rupture
30 to 34	Female	2032	698.340460997794	525.281543441432	909.864076733414	Incidence	Global	Maternal obstructed labor and uterine rupture
30 to 34	Female	2033	675.164870448462	492.536668856725	903.246301262089	Incidence	Global	Maternal obstructed labor and uterine rupture
30 to 34	Female	2034	652.77470646331	461.115511562763	897.585840801908	Incidence	Global	Maternal obstructed labor and uterine rupture
30 to 34	Female	2035	631.318148873139	431.060878974264	893.200110240179	Incidence	Global	Maternal obstructed labor and uterine rupture
30 to 34	Female	2036	610.851128375155	402.292840249151	890.401079465859	Incidence	Global	Maternal obstructed labor and uterine rupture
30 to 34	Female	2037	591.343511658584	374.692923710581	889.386839401261	Incidence	Global	Maternal obstructed labor and uterine rupture
30 to 34	Female	2038	572.781281351566	348.270387448179	890.193183017243	Incidence	Global	Maternal obstructed labor and uterine rupture
30 to 34	Female	2039	555.149040139598	323.042293422577	892.836082075653	Incidence	Global	Maternal obstructed labor and uterine rupture
30 to 34	Female	2040	538.430363866574	299.025560393896	897.322204068537	Incidence	Global	Maternal obstructed labor and uterine rupture
30 to 34	Female	2041	522.608138630533	276.23238609974	903.655564378435	Incidence	Global	Maternal obstructed labor and uterine rupture
30 to 34	Female	2042	507.664879294415	254.667814932574	911.841793008182	Incidence	Global	Maternal obstructed labor and uterine rupture
30 to 34	Female	2043	493.583028558022	234.32867736749	921.890946401626	Incidence	Global	Maternal obstructed labor and uterine rupture
30 to 34	Female	2044	480.345237285156	215.203412107718	933.81942004083	Incidence	Global	Maternal obstructed labor and uterine rupture
35 to 39	Female	1990	596.00126688207	594.852580945171	597.149157617925	Incidence	Global	Maternal obstructed labor and uterine rupture
35 to 39	Female	1991	582.264970836482	581.143134627394	583.386029907805	Incidence	Global	Maternal obstructed labor and uterine rupture
35 to 39	Female	1992	571.773198237132	570.672170408554	572.873462520261	Incidence	Global	Maternal obstructed labor and uterine rupture
35 to 39	Female	1993	566.23797534165	565.149287524843	567.32590582463	Incidence	Global	Maternal obstructed labor and uterine rupture
35 to 39	Female	1994	564.82479861019	563.742153575946	565.906685864303	Incidence	Global	Maternal obstructed labor and uterine rupture
35 to 39	Female	1995	566.105823688296	565.026617264383	567.184266511991	Incidence	Global	Maternal obstructed labor and uterine rupture
35 to 39	Female	1996	564.12177193261	563.052180208624	565.190598742911	Incidence	Global	Maternal obstructed labor and uterine rupture
35 to 39	Female	1997	554.751634033321	553.703055409115	555.799458250783	Incidence	Global	Maternal obstructed labor and uterine rupture
35 to 39	Female	1998	539.368722957243	538.351577671888	540.385133149508	Incidence	Global	Maternal obstructed labor and uterine rupture
35 to 39	Female	1999	523.145061849968	522.161339334817	524.128069474611	Incidence	Global	Maternal obstructed labor and uterine rupture
35 to 39	Female	2000	509.69192169844	508.737536985759	510.645607238674	Incidence	Global	Maternal obstructed labor and uterine rupture
35 to 39	Female	2001	500.341441284484	499.409504257004	501.272688792624	Incidence	Global	Maternal obstructed labor and uterine rupture
35 to 39	Female	2002	494.315675722891	493.400279710612	495.230387193669	Incidence	Global	Maternal obstructed labor and uterine rupture
35 to 39	Female	2003	491.580676292471	490.675219489916	492.48544937534	Incidence	Global	Maternal obstructed labor and uterine rupture
35 to 39	Female	2004	490.520599238524	489.621510006897	491.41900360116	Incidence	Global	Maternal obstructed labor and uterine rupture
35 to 39	Female	2005	489.914025391417	489.019941984797	490.807422509193	Incidence	Global	Maternal obstructed labor and uterine rupture
35 to 39	Female	2006	487.896969019275	487.009447945957	488.783804981205	Incidence	Global	Maternal obstructed labor and uterine rupture
35 to 39	Female	2007	483.800614852219	482.921093385351	484.679456652996	Incidence	Global	Maternal obstructed labor and uterine rupture
35 to 39	Female	2008	479.012312517198	478.14109020096	479.882862127273	Incidence	Global	Maternal obstructed labor and uterine rupture
35 to 39	Female	2009	475.491484110314	474.626711434783	476.355588997198	Incidence	Global	Maternal obstructed labor and uterine rupture
35 to 39	Female	2010	475.403561143822	474.540967674819	476.265485802466	Incidence	Global	Maternal obstructed labor and uterine rupture
35 to 39	Female	2011	479.193864893252	478.328650231787	480.058403043032	Incidence	Global	Maternal obstructed labor and uterine rupture
35 to 39	Female	2012	485.149257454079	484.279009610013	486.018817278269	Incidence	Global	Maternal obstructed labor and uterine rupture
35 to 39	Female	2013	491.513336177718	490.638257327997	492.387714533505	Incidence	Global	Maternal obstructed labor and uterine rupture
35 to 39	Female	2014	496.753063267219	495.875712806739	497.629702211197	Incidence	Global	Maternal obstructed labor and uterine rupture
35 to 39	Female	2015	499.737822886825	498.862022089267	500.612904591355	Incidence	Global	Maternal obstructed labor and uterine rupture
35 to 39	Female	2016	501.151166247444	500.279333142195	502.022275233371	Incidence	Global	Maternal obstructed labor and uterine rupture
35 to 39	Female	2017	501.540659777523	500.674593864114	502.405998140125	Incidence	Global	Maternal obstructed labor and uterine rupture
35 to 39	Female	2018	500.291680475291	499.433805284466	501.148827350896	Incidence	Global	Maternal obstructed labor and uterine rupture
35 to 39	Female	2019	496.837790004849	495.990817247597	497.684037425768	Incidence	Global	Maternal obstructed labor and uterine rupture
35 to 39	Female	2020	490.183819138656	489.351158154168	491.015763304137	Incidence	Global	Maternal obstructed labor and uterine rupture
35 to 39	Female	2021	490.098597805715	489.275406349499	490.921069027782	Incidence	Global	Maternal obstructed labor and uterine rupture
35 to 39	Female	2022	463.45459341732	421.589988666918	508.224639059809	Incidence	Global	Maternal obstructed labor and uterine rupture
35 to 39	Female	2023	458.842281745848	414.687952284463	506.281175586068	Incidence	Global	Maternal obstructed labor and uterine rupture
35 to 39	Female	2024	454.262892513469	406.646275878442	505.769444175846	Incidence	Global	Maternal obstructed labor and uterine rupture
35 to 39	Female	2025	449.61998530749	397.403341720496	506.616660242298	Incidence	Global	Maternal obstructed labor and uterine rupture
35 to 39	Female	2026	444.674288521629	386.856688582853	508.507369263251	Incidence	Global	Maternal obstructed labor and uterine rupture
35 to 39	Female	2027	439.174102537272	374.972603090655	511.023320331564	Incidence	Global	Maternal obstructed labor and uterine rupture
35 to 39	Female	2028	433.221032694189	362.106798114799	514.03257284189	Incidence	Global	Maternal obstructed labor and uterine rupture
35 to 39	Female	2029	426.633704291064	348.319074840737	517.129007194631	Incidence	Global	Maternal obstructed labor and uterine rupture
35 to 39	Female	2030	419.101213324179	333.529884119882	519.778243474165	Incidence	Global	Maternal obstructed labor and uterine rupture
35 to 39	Female	2031	410.362005035088	317.699004694104	521.497049625499	Incidence	Global	Maternal obstructed labor and uterine rupture
35 to 39	Female	2032	400.381857168718	300.980762128291	522.050191382936	Incidence	Global	Maternal obstructed labor and uterine rupture
35 to 39	Female	2033	389.578340228077	283.897419116123	521.722588564111	Incidence	Global	Maternal obstructed labor and uterine rupture
35 to 39	Female	2034	378.337732785867	266.865749904662	520.857609261764	Incidence	Global	Maternal obstructed labor and uterine rupture
35 to 39	Female	2035	366.963559937174	250.176913125524	519.771143593002	Incidence	Global	Maternal obstructed labor and uterine rupture
35 to 39	Female	2036	355.658373358043	234.007989025156	518.695883887383	Incidence	Global	Maternal obstructed labor and uterine rupture
35 to 39	Female	2037	344.545931682167	218.465478624686	517.769842704463	Incidence	Global	Maternal obstructed labor and uterine rupture
35 to 39	Female	2038	333.714684136222	203.642295727949	517.046757555981	Incidence	Global	Maternal obstructed labor and uterine rupture
35 to 39	Female	2039	323.267646532796	189.591672856241	516.678964999915	Incidence	Global	Maternal obstructed labor and uterine rupture
35 to 39	Female	2040	313.277592461856	176.310321816479	516.849810428052	Incidence	Global	Maternal obstructed labor and uterine rupture
35 to 39	Female	2041	303.772828920887	163.749486813531	517.729683772416	Incidence	Global	Maternal obstructed labor and uterine rupture
35 to 39	Female	2042	294.739337304459	151.843749734089	519.428101939039	Incidence	Global	Maternal obstructed labor and uterine rupture
35 to 39	Female	2043	286.17	140.571777679282	521.988871569808	Incidence	Global	Maternal obstructed labor and uterine rupture
35 to 39	Female	2044	278.058760859994	129.916550694108	525.447097547874	Incidence	Global	Maternal obstructed labor and uterine rupture
40 to 44	Female	1990	231.319443800022	230.524343312329	232.114881222076	Incidence	Global	Maternal obstructed labor and uterine rupture
40 to 44	Female	1991	222.285906561147	221.525229385229	223.046897752019	Incidence	Global	Maternal obstructed labor and uterine rupture
40 to 44	Female	1992	215.17571708146	214.439953015084	215.911783696684	Incidence	Global	Maternal obstructed labor and uterine rupture
40 to 44	Female	1993	207.726604352866	207.016747765045	208.436751897385	Incidence	Global	Maternal obstructed labor and uterine rupture
40 to 44	Female	1994	202.335917465328	201.645236713006	203.02687962136	Incidence	Global	Maternal obstructed labor and uterine rupture
40 to 44	Female	1995	197.150602352821	196.481401851887	197.82006613731	Incidence	Global	Maternal obstructed labor and uterine rupture
40 to 44	Female	1996	192.323783641214	191.66995960094	192.977867511468	Incidence	Global	Maternal obstructed labor and uterine rupture
40 to 44	Female	1997	188.221189849332	187.580027648061	188.862610117544	Incidence	Global	Maternal obstructed labor and uterine rupture
40 to 44	Female	1998	185.337202784819	184.70469993099	185.969963213139	Incidence	Global	Maternal obstructed labor and uterine rupture
40 to 44	Female	1999	183.464515515951	182.837830032421	184.091457739714	Incidence	Global	Maternal obstructed labor and uterine rupture
40 to 44	Female	2000	182.36441621729	181.742415254779	182.986669787318	Incidence	Global	Maternal obstructed labor and uterine rupture
40 to 44	Female	2001	180.820435558789	180.205763780705	181.435351878841	Incidence	Global	Maternal obstructed labor and uterine rupture
40 to 44	Female	2002	177.794576078727	177.192335200491	178.397051204604	Incidence	Global	Maternal obstructed labor and uterine rupture
40 to 44	Female	2003	173.354759905998	172.77008568392	173.939655190826	Incidence	Global	Maternal obstructed labor and uterine rupture
40 to 44	Female	2004	168.695581703294	168.129553724976	169.261816356987	Incidence	Global	Maternal obstructed labor and uterine rupture
40 to 44	Female	2005	164.527956822463	163.978891543385	165.077215186513	Incidence	Global	Maternal obstructed labor and uterine rupture
40 to 44	Female	2006	160.86697129077	160.332	161.401919506378	Incidence	Global	Maternal obstructed labor and uterine rupture
40 to 44	Female	2007	157.598836716777	157.076086931183	158.12176244927	Incidence	Global	Maternal obstructed labor and uterine rupture
40 to 44	Female	2008	155.260668525785	154.746312622353	155.775195971728	Incidence	Global	Maternal obstructed labor and uterine rupture
40 to 44	Female	2009	153.84518043342	153.33646372161	154.354064467817	Incidence	Global	Maternal obstructed labor and uterine rupture
40 to 44	Female	2010	153.449750117639	152.944344454512	153.955317123904	Incidence	Global	Maternal obstructed labor and uterine rupture
40 to 44	Female	2011	154.021869733202	153.518280185784	154.525611112497	Incidence	Global	Maternal obstructed labor and uterine rupture
40 to 44	Female	2012	155.213919340601	154.710872632082	155.717107108774	Incidence	Global	Maternal obstructed labor and uterine rupture
40 to 44	Female	2013	156.59566464901	156.092653240896	157.098806413744	Incidence	Global	Maternal obstructed labor and uterine rupture
40 to 44	Female	2014	157.932654815818	157.429324988432	158.436105722625	Incidence	Global	Maternal obstructed labor and uterine rupture
40 to 44	Female	2015	159.060401890086	158.556473550175	159.564444425659	Incidence	Global	Maternal obstructed labor and uterine rupture
40 to 44	Female	2016	159.998543912511	159.493616913156	160.503580707228	Incidence	Global	Maternal obstructed labor and uterine rupture
40 to 44	Female	2017	160.82920480893	160.323179830488	161.335336248968	Incidence	Global	Maternal obstructed labor and uterine rupture
40 to 44	Female	2018	161.365934512606	160.859594045746	161.872378295078	Incidence	Global	Maternal obstructed labor and uterine rupture
40 to 44	Female	2019	161.467147024147	160.962094005081	161.97229935338	Incidence	Global	Maternal obstructed labor and uterine rupture
40 to 44	Female	2020	160.808577323725	160.307046215213	161.310203625405	Incidence	Global	Maternal obstructed labor and uterine rupture
40 to 44	Female	2021	161.675041791689	161.175196008884	162.174972430365	Incidence	Global	Maternal obstructed labor and uterine rupture
40 to 44	Female	2022	158.963255853456	144.608731666088	174.300851998303	Incidence	Global	Maternal obstructed labor and uterine rupture
40 to 44	Female	2023	158.431813433377	143.191706494198	174.792433042162	Incidence	Global	Maternal obstructed labor and uterine rupture
40 to 44	Female	2024	157.621292402003	141.105376187613	175.474606110213	Incidence	Global	Maternal obstructed labor and uterine rupture
40 to 44	Female	2025	156.558670093049	138.383857320178	176.387017723591	Incidence	Global	Maternal obstructed labor and uterine rupture
40 to 44	Female	2026	155.289738155133	135.107621927573	177.561890010998	Incidence	Global	Maternal obstructed labor and uterine rupture
40 to 44	Female	2027	153.879064827556	131.395054628088	179.030229551046	Incidence	Global	Maternal obstructed labor and uterine rupture
40 to 44	Female	2028	152.453176957349	127.441404433947	180.863251341258	Incidence	Global	Maternal obstructed labor and uterine rupture
40 to 44	Female	2029	151.053161954344	123.343327186586	183.061949384475	Incidence	Global	Maternal obstructed labor and uterine rupture
40 to 44	Female	2030	149.646423055631	119.115552663742	185.562099455425	Incidence	Global	Maternal obstructed labor and uterine rupture
40 to 44	Female	2031	148.152936184573	114.727435373521	188.248714872032	Incidence	Global	Maternal obstructed labor and uterine rupture
40 to 44	Female	2032	146.488107740499	110.151132026209	190.98879098797	Incidence	Global	Maternal obstructed labor and uterine rupture
40 to 44	Female	2033	144.68427278017	105.464375854408	193.767531525856	Incidence	Global	Maternal obstructed labor and uterine rupture
40 to 44	Female	2034	142.679313204315	100.659790499056	196.46160066846	Incidence	Global	Maternal obstructed labor and uterine rupture
40 to 44	Female	2035	140.367826217101	95.6962441345441	198.888724149122	Incidence	Global	Maternal obstructed labor and uterine rupture
40 to 44	Female	2036	137.660176004307	90.5486924894021	200.876767777355	Incidence	Global	Maternal obstructed labor and uterine rupture
40 to 44	Female	2037	134.542204102731	85.2505265636311	202.343407067287	Incidence	Global	Maternal obstructed labor and uterine rupture
40 to 44	Female	2038	131.150924308026	79.9390556471254	203.408674756222	Incidence	Global	Maternal obstructed labor and uterine rupture
40 to 44	Female	2039	127.613832735569	74.7225672813773	204.212179488453	Incidence	Global	Maternal obstructed labor and uterine rupture
40 to 44	Female	2040	124.031546944401	69.6744549947389	204.881755009291	Incidence	Global	Maternal obstructed labor and uterine rupture
40 to 44	Female	2041	120.471392877799	64.8364632082704	205.512806553438	Incidence	Global	Maternal obstructed labor and uterine rupture
40 to 44	Female	2042	116.974461720882	60.2307725919819	206.164562221188	Incidence	Global	Maternal obstructed labor and uterine rupture
40 to 44	Female	2043	113.569791616477	55.8756031587289	206.864972809187	Incidence	Global	Maternal obstructed labor and uterine rupture
40 to 44	Female	2044	110.291983421187	51.780087848586	207.676332972396	Incidence	Global	Maternal obstructed labor and uterine rupture
45 to 49	Female	1990	74.1931888137565	73.694522725319	74.6932837973195	Incidence	Global	Maternal obstructed labor and uterine rupture
45 to 49	Female	1991	71.3267707516983	70.8414511411222	71.8135114401472	Incidence	Global	Maternal obstructed labor and uterine rupture
45 to 49	Female	1992	67.2288958589332	66.7658461726135	67.693330782147	Incidence	Global	Maternal obstructed labor and uterine rupture
45 to 49	Female	1993	63.2763348927668	62.8352391310671	63.7187781663802	Incidence	Global	Maternal obstructed labor and uterine rupture
45 to 49	Female	1994	59.0301033549726	58.6143414492034	59.4471575644539	Incidence	Global	Maternal obstructed labor and uterine rupture
45 to 49	Female	1995	55.820825925479	55.4244224567638	56.2184791101016	Incidence	Global	Maternal obstructed labor and uterine rupture
45 to 49	Female	1996	53.4898283757195	53.1109486172028	53.8698982921579	Incidence	Global	Maternal obstructed labor and uterine rupture
45 to 49	Female	1997	51.556498375751	51.1906344937613	51.9235159116598	Incidence	Global	Maternal obstructed labor and uterine rupture
45 to 49	Female	1998	49.3926446534076	49.0409154875278	49.7454895659277	Incidence	Global	Maternal obstructed labor and uterine rupture
45 to 49	Female	1999	47.659006240847	47.3183391729955	48.0007611065105	Incidence	Global	Maternal obstructed labor and uterine rupture
45 to 49	Female	2000	45.9911504069869	45.6627395521878	46.3206081466083	Incidence	Global	Maternal obstructed labor and uterine rupture
45 to 49	Female	2001	44.5938592914284	44.2741736448869	44.9145706631518	Incidence	Global	Maternal obstructed labor and uterine rupture
45 to 49	Female	2002	43.6855168626808	43.3721021982699	43.9999385472481	Incidence	Global	Maternal obstructed labor and uterine rupture
45 to 49	Female	2003	43.1605177813994	42.8510793124037	43.4709496608406	Incidence	Global	Maternal obstructed labor and uterine rupture
45 to 49	Female	2004	42.7645231771284	42.4580587911218	43.0719709973493	Incidence	Global	Maternal obstructed labor and uterine rupture
45 to 49	Female	2005	42.2585949845255	41.9555697261734	42.5625938176961	Incidence	Global	Maternal obstructed labor and uterine rupture
45 to 49	Female	2006	41.3200454988985	41.0229131132168	41.6181368320288	Incidence	Global	Maternal obstructed labor and uterine rupture
45 to 49	Female	2007	39.9017674874978	39.6135019452554	40.1909699228888	Incidence	Global	Maternal obstructed labor and uterine rupture
45 to 49	Female	2008	38.1757557283325	37.8987861276692	38.4536308186058	Incidence	Global	Maternal obstructed labor and uterine rupture
45 to 49	Female	2009	36.5161460529463	36.2505282974052	36.7826347280237	Incidence	Global	Maternal obstructed labor and uterine rupture
45 to 49	Female	2010	35.2381227251226	34.9819908903531	35.4950923608554	Incidence	Global	Maternal obstructed labor and uterine rupture
45 to 49	Female	2011	34.4119745319351	34.162761710292	34.6619969579316	Incidence	Global	Maternal obstructed labor and uterine rupture
45 to 49	Female	2012	33.8288688869547	33.5849166573449	34.0736074899086	Incidence	Global	Maternal obstructed labor and uterine rupture
45 to 49	Female	2013	33.4880656035591	33.2474982793228	33.7294029501298	Incidence	Global	Maternal obstructed labor and uterine rupture
45 to 49	Female	2014	33.267918176265	33.0296985836802	33.5068956845632	Incidence	Global	Maternal obstructed labor and uterine rupture
45 to 49	Female	2015	33.0505883702376	32.8144114416328	33.2875135272678	Incidence	Global	Maternal obstructed labor and uterine rupture
45 to 49	Female	2016	32.7407528064643	32.5070140391801	32.9752302328602	Incidence	Global	Maternal obstructed labor and uterine rupture
45 to 49	Female	2017	32.3996589829794	32.1683212005133	32.6317274285566	Incidence	Global	Maternal obstructed labor and uterine rupture
45 to 49	Female	2018	32.0060776931367	31.7772108175536	32.235668601198	Incidence	Global	Maternal obstructed labor and uterine rupture
45 to 49	Female	2019	31.5802226578924	31.3537242218782	31.8074404966298	Incidence	Global	Maternal obstructed labor and uterine rupture
45 to 49	Female	2020	31.0161360958881	30.7921822158104	31.2408082750846	Incidence	Global	Maternal obstructed labor and uterine rupture
45 to 49	Female	2021	30.5913614277216	30.3690849400544	30.8143576587373	Incidence	Global	Maternal obstructed labor and uterine rupture
45 to 49	Female	2022	36.2608703917463	32.985935442026	39.7619735318911	Incidence	Global	Maternal obstructed labor and uterine rupture
45 to 49	Female	2023	36.4803719816572	32.9704974792191	40.2493683461525	Incidence	Global	Maternal obstructed labor and uterine rupture
45 to 49	Female	2024	36.6405767465744	32.8002289795981	40.7927476248594	Incidence	Global	Maternal obstructed labor and uterine rupture
45 to 49	Female	2025	36.7376523439581	32.4712523002295	41.3929550281214	Incidence	Global	Maternal obstructed labor and uterine rupture
45 to 49	Female	2026	36.7711581602834	31.9901859710365	42.0476924013374	Incidence	Global	Maternal obstructed labor and uterine rupture
45 to 49	Female	2027	36.7375038749357	31.3672666440051	42.744789727272	Incidence	Global	Maternal obstructed labor and uterine rupture
45 to 49	Female	2028	36.6400654286616	30.6263876438612	43.4704698619562	Incidence	Global	Maternal obstructed labor and uterine rupture
45 to 49	Female	2029	36.4819791419263	29.7871753334264	44.214784570833	Incidence	Global	Maternal obstructed labor and uterine rupture
45 to 49	Female	2030	36.2692726175871	28.8674297302219	44.9755356990185	Incidence	Global	Maternal obstructed labor and uterine rupture
45 to 49	Female	2031	36.012390161921	27.8856616432524	45.7591241497646	Incidence	Global	Maternal obstructed labor and uterine rupture
45 to 49	Female	2032	35.7261343687232	26.8628093613382	46.5781653728663	Incidence	Global	Maternal obstructed labor and uterine rupture
45 to 49	Female	2033	35.4396035752512	25.8323828546798	47.4598933895399	Incidence	Global	Maternal obstructed labor and uterine rupture
45 to 49	Female	2034	35.1621904416044	24.807485573485	48.4130369275176	Incidence	Global	Maternal obstructed labor and uterine rupture
45 to 49	Female	2035	34.8863065321993	23.7860155536743	49.4274127867996	Incidence	Global	Maternal obstructed labor and uterine rupture
45 to 49	Female	2036	34.5932577467703	22.7579475846518	50.4774608612948	Incidence	Global	Maternal obstructed labor and uterine rupture
45 to 49	Female	2037	34.2631323559837	21.7147186753238	51.5314110776295	Incidence	Global	Maternal obstructed labor and uterine rupture
45 to 49	Female	2038	33.9031107631777	20.6689582524255	52.589008917284	Incidence	Global	Maternal obstructed labor and uterine rupture
45 to 49	Female	2039	33.498292062317	19.6173029556968	53.618874452391	Incidence	Global	Maternal obstructed labor and uterine rupture
45 to 49	Female	2040	33.0235094718496	18.5504693389249	54.5718720475791	Incidence	Global	Maternal obstructed labor and uterine rupture
45 to 49	Female	2041	32.4571020910918	17.4627604218827	55.4002773095147	Incidence	Global	Maternal obstructed labor and uterine rupture
45 to 49	Female	2042	31.7949769749784	16.3599258198652	56.0804264078672	Incidence	Global	Maternal obstructed labor and uterine rupture
45 to 49	Female	2043	31.068609130562	15.2674116878523	56.6452746717808	Incidence	Global	Maternal obstructed labor and uterine rupture
45 to 49	Female	2044	30.307529407542	14.2049778205486	57.1331974646038	Incidence	Global	Maternal obstructed labor and uterine rupture
15 to 19	Female	1990	289.05647579933	288.397491849053	289.715175464184	Incidence	Global	Ectopic pregnancy
15 to 19	Female	1991	284.170246443827	283.516542050943	284.823678791534	Incidence	Global	Ectopic pregnancy
15 to 19	Female	1992	279.873427971111	279.224230472893	280.522364523684	Incidence	Global	Ectopic pregnancy
15 to 19	Female	1993	276.083789280921	275.43906205983	276.728264817223	Incidence	Global	Ectopic pregnancy
15 to 19	Female	1994	272.598261162095	271.958776332349	273.237501385354	Incidence	Global	Ectopic pregnancy
15 to 19	Female	1995	269.520621110934	268.88722382941	270.153778090012	Incidence	Global	Ectopic pregnancy
15 to 19	Female	1996	266.356859993344	265.730612173253	266.982870726496	Incidence	Global	Ectopic pregnancy
15 to 19	Female	1997	262.569862456119	261.952185593184	263.187306057711	Incidence	Global	Ectopic pregnancy
15 to 19	Female	1998	258.350614718321	257.742690559576	258.958309597633	Incidence	Global	Ectopic pregnancy
15 to 19	Female	1999	253.980875134765	253.38343405312	254.57809053889	Incidence	Global	Ectopic pregnancy
15 to 19	Female	2000	249.805132366941	249.21843758577	250.391603924537	Incidence	Global	Ectopic pregnancy
15 to 19	Female	2001	245.252317131259	244.677350230813	245.827063472734	Incidence	Global	Ectopic pregnancy
15 to 19	Female	2002	240.209463100381	239.646627850647	240.772081903189	Incidence	Global	Ectopic pregnancy
15 to 19	Female	2003	235.431342577235	234.879436657212	235.983036711051	Incidence	Global	Ectopic pregnancy
15 to 19	Female	2004	231.461289318098	230.918052731038	232.004318553866	Incidence	Global	Ectopic pregnancy
15 to 19	Female	2005	228.68525447224	228.14772290113	229.222582289749	Incidence	Global	Ectopic pregnancy
15 to 19	Female	2006	227.108498694388	226.573477198021	227.643319494161	Incidence	Global	Ectopic pregnancy
15 to 19	Female	2007	226.091178253682	225.556693358782	226.625465931887	Incidence	Global	Ectopic pregnancy
15 to 19	Female	2008	225.28862199668	224.753570759389	225.823480162767	Incidence	Global	Ectopic pregnancy
15 to 19	Female	2009	224.358523611622	223.822598306864	224.894261001214	Incidence	Global	Ectopic pregnancy
15 to 19	Female	2010	222.994562651474	222.458118259428	223.530825687306	Incidence	Global	Ectopic pregnancy
15 to 19	Female	2011	220.204819150163	219.670092520664	220.739373983582	Incidence	Global	Ectopic pregnancy
15 to 19	Female	2012	215.713284779633	215.183056034611	216.243354825788	Incidence	Global	Ectopic pregnancy
15 to 19	Female	2013	210.232142889645	209.708123069144	210.756019255108	Incidence	Global	Ectopic pregnancy
15 to 19	Female	2014	204.473396422455	203.956314424063	204.990350728183	Incidence	Global	Ectopic pregnancy
15 to 19	Female	2015	199.125866539251	198.615645710305	199.635973990929	Incidence	Global	Ectopic pregnancy
15 to 19	Female	2016	194.006685987104	193.503365000036	194.509907059223	Incidence	Global	Ectopic pregnancy
15 to 19	Female	2017	188.469861361697	187.974389290107	188.965247743824	Incidence	Global	Ectopic pregnancy
15 to 19	Female	2018	182.675041524985	182.188311407635	183.161700256995	Incidence	Global	Ectopic pregnancy
15 to 19	Female	2019	176.76947670778	176.292231430547	177.246664469344	Incidence	Global	Ectopic pregnancy
15 to 19	Female	2020	169.836540865931	169.370714625609	170.302325761669	Incidence	Global	Ectopic pregnancy
15 to 19	Female	2021	166.121198735638	165.663000490925	166.579361553028	Incidence	Global	Ectopic pregnancy
15 to 19	Female	2022	162.147229207966	141.96965663125	184.321942537255	Incidence	Global	Ectopic pregnancy
15 to 19	Female	2023	157.803715388024	135.931782432302	182.095	Incidence	Global	Ectopic pregnancy
15 to 19	Female	2024	153.617951826546	129.50774096139	180.766609187484	Incidence	Global	Ectopic pregnancy
15 to 19	Female	2025	149.591760140371	122.832569819106	180.241893067764	Incidence	Global	Ectopic pregnancy
15 to 19	Female	2026	145.726402462804	116.040657247634	180.421170442822	Incidence	Global	Ectopic pregnancy
15 to 19	Female	2027	142.022643157526	109.245455323695	181.220002754302	Incidence	Global	Ectopic pregnancy
15 to 19	Female	2028	138.48081898384	102.535276172483	182.573713765867	Incidence	Global	Ectopic pregnancy
15 to 19	Female	2029	135.100910040685	95.9760161112143	184.435738162439	Incidence	Global	Ectopic pregnancy
15 to 19	Female	2030	131.882607592667	89.6155757715673	186.77423642698	Incidence	Global	Ectopic pregnancy
15 to 19	Female	2031	128.825377986372	83.4879500044815	189.568854763117	Incidence	Global	Ectopic pregnancy
15 to 19	Female	2032	125.928522686229	77.6164867386027	192.808156284283	Incidence	Global	Ectopic pregnancy
15 to 19	Female	2033	123.19123627338	72.0163571468173	196.48773315963	Incidence	Global	Ectopic pregnancy
15 to 19	Female	2034	120.61266284907	66.6964072567147	200.608869624258	Incidence	Global	Ectopic pregnancy
15 to 19	Female	2035	118.191950538308	61.6605531808108	205.177614148274	Incidence	Global	Ectopic pregnancy
15 to 19	Female	2036	115.92830464109	56.9088485737311	210.204147649389	Incidence	Global	Ectopic pregnancy
15 to 19	Female	2037	113.821039849699	52.4383153752356	215.702364989091	Incidence	Global	Ectopic pregnancy
15 to 19	Female	2038	111.869632008576	48.2436012653116	221.689610703433	Incidence	Global	Ectopic pregnancy
15 to 19	Female	2039	110.073769970065	44.3175079606263	228.186530168196	Incidence	Global	Ectopic pregnancy
15 to 19	Female	2040	108.433408112086	40.6514210530491	235.217009045855	Incidence	Global	Ectopic pregnancy
15 to 19	Female	2041	106.948820176232	37.2356631518106	242.808181959721	Incidence	Global	Ectopic pregnancy
15 to 19	Female	2042	105.620655166795	34.059786019564	250.990498018313	Incidence	Global	Ectopic pregnancy
15 to 19	Female	2043	104.449996085485	31.1128132388186	259.797835016794	Incidence	Global	Ectopic pregnancy
15 to 19	Female	2044	103.438422544565	28.3834421400484	269.267657087893	Incidence	Global	Ectopic pregnancy
20 to 24	Female	1990	899.203600996084	898.013884237656	900.39196336412	Incidence	Global	Ectopic pregnancy
20 to 24	Female	1991	872.850673430431	871.683416669643	874.016613624323	Incidence	Global	Ectopic pregnancy
20 to 24	Female	1992	848.221868381934	847.075030677538	849.367425047769	Incidence	Global	Ectopic pregnancy
20 to 24	Female	1993	825.813607129398	824.685171952139	826.940793825506	Incidence	Global	Ectopic pregnancy
20 to 24	Female	1994	805.661655540981	804.549	806.772839802241	Incidence	Global	Ectopic pregnancy
20 to 24	Female	1995	787.734961396306	786.636299966489	788.832430209046	Incidence	Global	Ectopic pregnancy
20 to 24	Female	1996	770.912843994036	769.826360230222	771.998160101474	Incidence	Global	Ectopic pregnancy
20 to 24	Female	1997	754.074666020244	753.000178408307	755.148011211977	Incidence	Global	Ectopic pregnancy
20 to 24	Female	1998	738.066610971827	737.004484618098	739.127619147178	Incidence	Global	Ectopic pregnancy
20 to 24	Female	1999	723.594052816659	722.54514858938	724.641860922135	Incidence	Global	Ectopic pregnancy
20 to 24	Female	2000	711.009306697442	709.97434080882	712.043195653948	Incidence	Global	Ectopic pregnancy
20 to 24	Female	2001	698.496188304738	697.476427911783	699.514890829104	Incidence	Global	Ectopic pregnancy
20 to 24	Female	2002	684.860446402829	683.857839066762	685.86201663862	Incidence	Global	Ectopic pregnancy
20 to 24	Female	2003	671.271409660625	670.287107784716	672.254695087584	Incidence	Global	Ectopic pregnancy
20 to 24	Female	2004	658.769833336073	657.804083232492	659.734585906535	Incidence	Global	Ectopic pregnancy
20 to 24	Female	2005	648.265950754861	647.318236701545	649.212683054776	Incidence	Global	Ectopic pregnancy
20 to 24	Female	2006	637.341146005968	636.412704018477	638.268622650231	Incidence	Global	Ectopic pregnancy
20 to 24	Female	2007	624.025056247257	623.117244371698	624.931922900821	Incidence	Global	Ectopic pregnancy
20 to 24	Female	2008	609.945284291078	609.057171047205	610.832473660515	Incidence	Global	Ectopic pregnancy
20 to 24	Female	2009	597.617208586385	596.745248431708	598.488263601432	Incidence	Global	Ectopic pregnancy
20 to 24	Female	2010	589.950204700173	589.087880998094	590.811634938106	Incidence	Global	Ectopic pregnancy
20 to 24	Female	2011	585.185542789062	584.327304419079	586.042895047888	Incidence	Global	Ectopic pregnancy
20 to 24	Female	2012	579.467077697269	578.611375094103	580.321903190241	Incidence	Global	Ectopic pregnancy
20 to 24	Female	2013	572.906461393762	572.052519779329	573.759536431363	Incidence	Global	Ectopic pregnancy
20 to 24	Female	2014	565.597536953459	564.745260530634	566.448958762484	Incidence	Global	Ectopic pregnancy
20 to 24	Female	2015	557.739788502281	556.889710903708	558.58902454959	Incidence	Global	Ectopic pregnancy
20 to 24	Female	2016	547.836288478109	546.991177869069	548.680573996231	Incidence	Global	Ectopic pregnancy
20 to 24	Female	2017	535.119717078097	534.283009645219	535.955620578468	Incidence	Global	Ectopic pregnancy
20 to 24	Female	2018	520.778194073571	519.952036309888	521.603571958553	Incidence	Global	Ectopic pregnancy
20 to 24	Female	2019	505.737204811727	504.922879278021	506.550775946132	Incidence	Global	Ectopic pregnancy
20 to 24	Female	2020	486.849900369361	486.051319209954	487.647759485218	Incidence	Global	Ectopic pregnancy
20 to 24	Female	2021	473.771657981277	472.984520788678	474.558095766268	Incidence	Global	Ectopic pregnancy
20 to 24	Female	2022	487.887272691274	434.34810777052	546.003642355564	Incidence	Global	Ectopic pregnancy
20 to 24	Female	2023	474.758143572453	419.583171542015	534.773368321858	Incidence	Global	Ectopic pregnancy
20 to 24	Female	2024	461.986235701799	403.812163997677	525.456689885894	Incidence	Global	Ectopic pregnancy
20 to 24	Female	2025	449.592217479614	387.015424108636	518.242822255292	Incidence	Global	Ectopic pregnancy
20 to 24	Female	2026	437.625330304552	369.308114195331	513.276866820653	Incidence	Global	Ectopic pregnancy
20 to 24	Female	2027	426.101143258802	350.89197240856	510.546631389636	Incidence	Global	Ectopic pregnancy
20 to 24	Female	2028	415.024260137809	332.092339821976	509.844216727807	Incidence	Global	Ectopic pregnancy
20 to 24	Female	2029	404.39808666653	313.20686906162	510.95838656221	Incidence	Global	Ectopic pregnancy
20 to 24	Female	2030	394.223949851486	294.478145399534	513.708	Incidence	Global	Ectopic pregnancy
20 to 24	Female	2031	384.502337897303	276.095848399821	517.952824249954	Incidence	Global	Ectopic pregnancy
20 to 24	Female	2032	375.232920032119	258.203442379704	523.589378935894	Incidence	Global	Ectopic pregnancy
20 to 24	Female	2033	366.414663740365	240.906660038257	530.547254608417	Incidence	Global	Ectopic pregnancy
20 to 24	Female	2034	358.04599413604	224.281218363658	538.782035289951	Incidence	Global	Ectopic pregnancy
20 to 24	Female	2035	350.124953209073	208.37910275707	548.270474416576	Incidence	Global	Ectopic pregnancy
20 to 24	Female	2036	342.649356255385	193.233519189744	559.006630688523	Incidence	Global	Ectopic pregnancy
20 to 24	Female	2037	335.616945386385	178.86276925716	570.999035044744	Incidence	Global	Ectopic pregnancy
20 to 24	Female	2038	329.025540066911	165.273296738383	584.268675875093	Incidence	Global	Ectopic pregnancy
20 to 24	Female	2039	322.873185189212	152.462107601218	598.847602624244	Incidence	Global	Ectopic pregnancy
20 to 24	Female	2040	317.158297592688	140.418714554507	614.777997028331	Incidence	Global	Ectopic pregnancy
20 to 24	Female	2041	311.879812258288	129.126717277772	632.111598810689	Incidence	Global	Ectopic pregnancy
20 to 24	Female	2042	307.037329668003	118.565099589566	650.909402719919	Incidence	Global	Ectopic pregnancy
20 to 24	Female	2043	302.63126605494	108.70930262095	671.241570592496	Incidence	Global	Ectopic pregnancy
20 to 24	Female	2044	298.663008501141	99.5321178300338	693.187518637169	Incidence	Global	Ectopic pregnancy
25 to 29	Female	1990	1072.66019726679	1071.2916509222	1074.02713786694	Incidence	Global	Ectopic pregnancy
25 to 29	Female	1991	1048.97027074276	1047.63621004304	1050.30276215926	Incidence	Global	Ectopic pregnancy
25 to 29	Female	1992	1023.73297354255	1022.43045189364	1025.03396353024	Incidence	Global	Ectopic pregnancy
25 to 29	Female	1993	998.885168222777	997.609	1000.16017137118	Incidence	Global	Ectopic pregnancy
25 to 29	Female	1994	976.580417301381	975.325102833881	977.834267747726	Incidence	Global	Ectopic pregnancy
25 to 29	Female	1995	958.492743008792	957.254417608056	959.729630171133	Incidence	Global	Ectopic pregnancy
25 to 29	Female	1996	942.472753102502	941.250331169581	943.693759854252	Incidence	Global	Ectopic pregnancy
25 to 29	Female	1997	927.524265677248	926.316523635377	928.730614056268	Incidence	Global	Ectopic pregnancy
25 to 29	Female	1998	913.596791093191	912.402721465444	914.789487138179	Incidence	Global	Ectopic pregnancy
25 to 29	Female	1999	900.800148094139	899.61819679057	901.980744215548	Incidence	Global	Ectopic pregnancy
25 to 29	Female	2000	889.469350552679	888.297344917782	890.640017194744	Incidence	Global	Ectopic pregnancy
25 to 29	Female	2001	877.818009559209	876.65468454456	878.980012024324	Incidence	Global	Ectopic pregnancy
25 to 29	Female	2002	864.263528257023	863.109627171414	865.416125921049	Incidence	Global	Ectopic pregnancy
25 to 29	Female	2003	850.184744915063	849.041445459672	851.326761057343	Incidence	Global	Ectopic pregnancy
25 to 29	Female	2004	836.866681267372	835.735546265998	837.996552340279	Incidence	Global	Ectopic pregnancy
25 to 29	Female	2005	825.558671951397	824.440678959822	826.67541783864	Incidence	Global	Ectopic pregnancy
25 to 29	Female	2006	814.272405545585	813.169000534332	815.37458041927	Incidence	Global	Ectopic pregnancy
25 to 29	Female	2007	801.502703082191	800.416103078715	802.588092179085	Incidence	Global	Ectopic pregnancy
25 to 29	Female	2008	789.114138924112	788.045502112151	790.181583675335	Incidence	Global	Ectopic pregnancy
25 to 29	Female	2009	778.978010897744	777.926905765302	780.027939730217	Incidence	Global	Ectopic pregnancy
25 to 29	Female	2010	773.120886992817	772.085009144213	774.15559833382	Incidence	Global	Ectopic pregnancy
25 to 29	Female	2011	774.473735845407	773.449026843358	775.497278235575	Incidence	Global	Ectopic pregnancy
25 to 29	Female	2012	782.666494928251	781.648115134623	783.683698824593	Incidence	Global	Ectopic pregnancy
25 to 29	Female	2013	793.546652550848	792.531136165422	794.560980267994	Incidence	Global	Ectopic pregnancy
25 to 29	Female	2014	802.056991912335	801.043157683738	803.069627711616	Incidence	Global	Ectopic pregnancy
25 to 29	Female	2015	802.681901993428	801.671392753769	803.69121291244	Incidence	Global	Ectopic pregnancy
25 to 29	Female	2016	794.707700546236	793.702146148827	795.712067250931	Incidence	Global	Ectopic pregnancy
25 to 29	Female	2017	782.016927096632	781.016755134492	783.015927808019	Incidence	Global	Ectopic pregnancy
25 to 29	Female	2018	766.932	765.937601776919	767.925690643612	Incidence	Global	Ectopic pregnancy
25 to 29	Female	2019	751.610108146227	750.620851551255	752.598233469128	Incidence	Global	Ectopic pregnancy
25 to 29	Female	2020	730.052521037751	729.073309847088	731.030630600165	Incidence	Global	Ectopic pregnancy
25 to 29	Female	2021	721.728461765159	720.752188535593	722.703644898469	Incidence	Global	Ectopic pregnancy
25 to 29	Female	2022	693.573988543698	617.694616664934	775.904471194362	Incidence	Global	Ectopic pregnancy
25 to 29	Female	2023	674.931575829256	596.773842058018	759.869920019778	Incidence	Global	Ectopic pregnancy
25 to 29	Female	2024	656.535736317895	574.439647933373	745.892557533745	Incidence	Global	Ectopic pregnancy
25 to 29	Female	2025	638.686041620446	551.095424963635	734.274080434533	Incidence	Global	Ectopic pregnancy
25 to 29	Female	2026	621.579494083258	527.155241863906	725.136477441121	Incidence	Global	Ectopic pregnancy
25 to 29	Female	2027	605.218137711775	502.906466854593	718.341062007841	Incidence	Global	Ectopic pregnancy
25 to 29	Female	2028	589.409768660411	478.504691453725	713.468546309664	Incidence	Global	Ectopic pregnancy
25 to 29	Female	2029	574.092724719581	454.109192098366	710.343577771433	Incidence	Global	Ectopic pregnancy
25 to 29	Female	2030	559.288241611936	429.856388166596	708.980956618088	Incidence	Global	Ectopic pregnancy
25 to 29	Female	2031	545.054030201633	405.858018058017	709.500731816314	Incidence	Global	Ectopic pregnancy
25 to 29	Female	2032	531.406594198475	382.197972517634	711.964130526085	Incidence	Global	Ectopic pregnancy
25 to 29	Female	2033	518.348348588424	359.019855910915	716.299334267445	Incidence	Global	Ectopic pregnancy
25 to 29	Female	2034	505.880461100908	336.447740354129	722.442021383655	Incidence	Global	Ectopic pregnancy
25 to 29	Female	2035	494.003035471439	314.584019990578	730.341622253531	Incidence	Global	Ectopic pregnancy
25 to 29	Female	2036	482.715316246616	293.509941861763	739.963368696034	Incidence	Global	Ectopic pregnancy
25 to 29	Female	2037	472.015902280201	273.287259417028	751.288419171514	Incidence	Global	Ectopic pregnancy
25 to 29	Female	2038	461.902960564195	253.960289334431	764.313223299008	Incidence	Global	Ectopic pregnancy
25 to 29	Female	2039	452.374436843098	235.558047677318	779.048675670749	Incidence	Global	Ectopic pregnancy
25 to 29	Female	2040	443.42826214792	218.096318355611	795.51930404543	Incidence	Global	Ectopic pregnancy
25 to 29	Female	2041	435.062555706699	201.579586330327	813.762593948109	Incidence	Global	Ectopic pregnancy
25 to 29	Female	2042	427.275825381071	186.00280578892	833.828487198996	Incidence	Global	Ectopic pregnancy
25 to 29	Female	2043	420.067167219214	171.352993868927	855.779062058492	Incidence	Global	Ectopic pregnancy
25 to 29	Female	2044	413.436466060241	157.61065164766	879.688389631483	Incidence	Global	Ectopic pregnancy
30 to 34	Female	1990	841.606184554544	840.302019044789	842.909083524948	Incidence	Global	Ectopic pregnancy
30 to 34	Female	1991	816.209060596446	814.933709023504	817.48318577408	Incidence	Global	Ectopic pregnancy
30 to 34	Female	1992	793.856170909757	792.612186920785	795.098962785041	Incidence	Global	Ectopic pregnancy
30 to 34	Female	1993	774.235414311307	773.026174513905	775.443490675054	Incidence	Global	Ectopic pregnancy
30 to 34	Female	1994	758.607503597496	757.431297344409	759.782568318481	Incidence	Global	Ectopic pregnancy
30 to 34	Female	1995	749.340414349515	748.190695696355	750.489003443564	Incidence	Global	Ectopic pregnancy
30 to 34	Female	1996	745.801909774432	744.671052096818	746.931641384092	Incidence	Global	Ectopic pregnancy
30 to 34	Female	1997	744.363065029961	743.246303051228	745.478701777727	Incidence	Global	Ectopic pregnancy
30 to 34	Female	1998	744.417293840372	743.309227916723	745.524233648167	Incidence	Global	Ectopic pregnancy
30 to 34	Female	1999	744.49574013532	743.39384573554	745.596507819143	Incidence	Global	Ectopic pregnancy
30 to 34	Female	2000	743.692761440953	742.596549695413	744.787847388305	Incidence	Global	Ectopic pregnancy
30 to 34	Female	2001	741.55668166596	740.467506334767	742.644734207026	Incidence	Global	Ectopic pregnancy
30 to 34	Female	2002	739.464076119155	738.381444444484	740.545587997421	Incidence	Global	Ectopic pregnancy
30 to 34	Female	2003	737.442466695379	736.365941476552	738.517875042293	Incidence	Global	Ectopic pregnancy
30 to 34	Female	2004	735.670980131603	734.599539253621	736.741306726792	Incidence	Global	Ectopic pregnancy
30 to 34	Female	2005	734.707780493875	733.639648120998	735.774799980321	Incidence	Global	Ectopic pregnancy
30 to 34	Female	2006	733.531052950292	732.465018651502	734.595976133727	Incidence	Global	Ectopic pregnancy
30 to 34	Female	2007	731.038758358528	729.975184668619	732.101224744674	Incidence	Global	Ectopic pregnancy
30 to 34	Female	2008	728.295321809701	727.235128254087	729.354412236033	Incidence	Global	Ectopic pregnancy
30 to 34	Female	2009	726.462363916326	725.406794574357	727.516832839832	Incidence	Global	Ectopic pregnancy
30 to 34	Female	2010	726.667150333145	725.616640796022	727.716559005689	Incidence	Global	Ectopic pregnancy
30 to 34	Female	2011	732.547310627256	731.498843941758	733.594667446916	Incidence	Global	Ectopic pregnancy
30 to 34	Female	2012	743.864903253612	742.815852352654	744.912827413411	Incidence	Global	Ectopic pregnancy
30 to 34	Female	2013	756.799678774413	755.750357936039	757.847854184944	Incidence	Global	Ectopic pregnancy
30 to 34	Female	2014	768.002523271977	766.955363554084	769.048522107998	Incidence	Global	Ectopic pregnancy
30 to 34	Female	2015	773.750890860974	772.710702559328	774.789911308126	Incidence	Global	Ectopic pregnancy
30 to 34	Female	2016	774.870545032854	773.841481158272	775.898	Incidence	Global	Ectopic pregnancy
30 to 34	Female	2017	774.754855081626	773.737247422946	775.771297028022	Incidence	Global	Ectopic pregnancy
30 to 34	Female	2018	772.518812047786	771.512157507383	773.524305711806	Incidence	Global	Ectopic pregnancy
30 to 34	Female	2019	767.641546113405	766.644821824649	768.63711755246	Incidence	Global	Ectopic pregnancy
30 to 34	Female	2020	753.504372887299	752.520322456133	754.487290608365	Incidence	Global	Ectopic pregnancy
30 to 34	Female	2021	746.378135112186	745.398588962639	747.35655839232	Incidence	Global	Ectopic pregnancy
30 to 34	Female	2022	664.870436431218	592.338862765165	743.536789496707	Incidence	Global	Ectopic pregnancy
30 to 34	Female	2023	650.740418643041	575.569744750562	732.417140559051	Incidence	Global	Ectopic pregnancy
30 to 34	Female	2024	636.273157826543	556.81966691173	722.764413512528	Incidence	Global	Ectopic pregnancy
30 to 34	Female	2025	621.470072918894	536.210896176516	714.549594525545	Incidence	Global	Ectopic pregnancy
30 to 34	Female	2026	606.340125843624	514.016147926067	707.639623751921	Incidence	Global	Ectopic pregnancy
30 to 34	Female	2027	590.952140947405	490.645766045957	701.882496312341	Incidence	Global	Ectopic pregnancy
30 to 34	Female	2028	575.546110797739	466.70826888207	697.242583204692	Incidence	Global	Ectopic pregnancy
30 to 34	Female	2029	560.397519841014	442.738370021232	693.809421085362	Incidence	Global	Ectopic pregnancy
30 to 34	Female	2030	545.756658510395	419.148723969225	691.729864504539	Incidence	Global	Ectopic pregnancy
30 to 34	Female	2031	531.787717955222	396.202400641903	691.118002997925	Incidence	Global	Ectopic pregnancy
30 to 34	Female	2032	518.48882860395	373.991051424941	691.916	Incidence	Global	Ectopic pregnancy
30 to 34	Female	2033	505.690068734588	352.485144791898	693.827376636016	Incidence	Global	Ectopic pregnancy
30 to 34	Female	2034	493.336172907082	331.682255710624	696.771518760454	Incidence	Global	Ectopic pregnancy
30 to 34	Female	2035	481.443762041642	311.585807770994	700.833536846121	Incidence	Global	Ectopic pregnancy
30 to 34	Female	2036	470.06185998974	292.197247108435	706.192929904959	Incidence	Global	Ectopic pregnancy
30 to 34	Female	2037	459.204446679484	273.503298620998	712.980343793666	Incidence	Global	Ectopic pregnancy
30 to 34	Female	2038	448.87268566559	255.529415713608	721.226370003939	Incidence	Global	Ectopic pregnancy
30 to 34	Female	2039	439.067049696652	238.298298542726	730.958882110079	Incidence	Global	Ectopic pregnancy
30 to 34	Female	2040	429.78751092981	221.827882733285	742.207104076553	Incidence	Global	Ectopic pregnancy
30 to 34	Female	2041	421.033735464664	206.130414066601	755.004196279608	Incidence	Global	Ectopic pregnancy
30 to 34	Female	2042	412.805276375965	191.212179774997	769.388935075867	Incidence	Global	Ectopic pregnancy
30 to 34	Female	2043	405.101763785211	177.073635053336	785.406854002955	Incidence	Global	Ectopic pregnancy
30 to 34	Female	2044	397.923098490878	163.71	803.111077224379	Incidence	Global	Ectopic pregnancy
35 to 39	Female	1990	576.764664715693	575.634615911354	577.893958180427	Incidence	Global	Ectopic pregnancy
35 to 39	Female	1991	550.507149286192	549.416291120832	551.597296234229	Incidence	Global	Ectopic pregnancy
35 to 39	Female	1992	527.166243575817	526.109003591826	528.222812966322	Incidence	Global	Ectopic pregnancy
35 to 39	Female	1993	509.58498372167	508.552172426459	510.617156133733	Incidence	Global	Ectopic pregnancy
35 to 39	Female	1994	499.179934976831	498.162134111233	500.19711541561	Incidence	Global	Ectopic pregnancy
35 to 39	Female	1995	495.866168388184	494.856123062018	496.87559654385	Incidence	Global	Ectopic pregnancy
35 to 39	Female	1996	494.127545242043	493.126499960619	495.127970710584	Incidence	Global	Ectopic pregnancy
35 to 39	Female	1997	489.104819366788	488.120226511801	490.088793268971	Incidence	Global	Ectopic pregnancy
35 to 39	Female	1998	481.412801371938	480.451840246399	482.373146377858	Incidence	Global	Ectopic pregnancy
35 to 39	Female	1999	473.73675371638	472.800614614744	474.67227873118	Incidence	Global	Ectopic pregnancy
35 to 39	Female	2000	467.940138096376	467.025649737867	468.854011838636	Incidence	Global	Ectopic pregnancy
35 to 39	Female	2001	464.982571059782	464.084134094363	465.880389530324	Incidence	Global	Ectopic pregnancy
35 to 39	Female	2002	464.235918165205	463.348773839867	465.122437863638	Incidence	Global	Ectopic pregnancy
35 to 39	Female	2003	465.615314355046	464.73405509323	466.495941222703	Incidence	Global	Ectopic pregnancy
35 to 39	Female	2004	468.01748035529	467.139213939155	468.89510607678	Incidence	Global	Ectopic pregnancy
35 to 39	Female	2005	470.840074460505	469.963523357255	471.715976479507	Incidence	Global	Ectopic pregnancy
35 to 39	Female	2006	473.325890746742	472.451674201017	474.199450438993	Incidence	Global	Ectopic pregnancy
35 to 39	Female	2007	476.069145474854	475.196625251107	476.941	Incidence	Global	Ectopic pregnancy
35 to 39	Female	2008	479.106566268659	478.235196521128	479.977263136694	Incidence	Global	Ectopic pregnancy
35 to 39	Female	2009	482.784688065052	481.913240611634	483.655453764288	Incidence	Global	Ectopic pregnancy
35 to 39	Female	2010	487.579474555919	486.705832569866	488.452424521009	Incidence	Global	Ectopic pregnancy
35 to 39	Female	2011	495.245632375337	494.365970615244	496.124587224001	Incidence	Global	Ectopic pregnancy
35 to 39	Female	2012	504.679227001461	503.791558060486	505.566171231621	Incidence	Global	Ectopic pregnancy
35 to 39	Female	2013	513.066722690993	512.172584351042	513.960120376115	Incidence	Global	Ectopic pregnancy
35 to 39	Female	2014	518.266545426412	517.370320641507	519.162018915866	Incidence	Global	Ectopic pregnancy
35 to 39	Female	2015	518.525143154687	517.632957947356	519.416574745483	Incidence	Global	Ectopic pregnancy
35 to 39	Female	2016	515.616	514.731711873386	516.499749291968	Incidence	Global	Ectopic pregnancy
35 to 39	Female	2017	512.299369278896	511.423999950987	513.173991482541	Incidence	Global	Ectopic pregnancy
35 to 39	Female	2018	508.504236350968	507.639288754352	509.368440770046	Incidence	Global	Ectopic pregnancy
35 to 39	Female	2019	504.092799158651	503.239607293102	504.945252630351	Incidence	Global	Ectopic pregnancy
35 to 39	Female	2020	495.07574523989	494.23888563027	495.91187924821	Incidence	Global	Ectopic pregnancy
35 to 39	Female	2021	488.616253402367	487.794263713636	489.437525467445	Incidence	Global	Ectopic pregnancy
35 to 39	Female	2022	458.216095551863	408.323783838292	512.330432958778	Incidence	Global	Ectopic pregnancy
35 to 39	Female	2023	451.534682045264	399.482739331771	508.087126108925	Incidence	Global	Ectopic pregnancy
35 to 39	Female	2024	444.54943169725	389.156082078696	504.84505042755	Incidence	Global	Ectopic pregnancy
35 to 39	Female	2025	437.148528811155	377.304335031651	502.489943931792	Incidence	Global	Ectopic pregnancy
35 to 39	Female	2026	429.258624843577	364.028312102287	500.863852483037	Incidence	Global	Ectopic pregnancy
35 to 39	Female	2027	420.900937015248	349.577128443619	499.846302842158	Incidence	Global	Ectopic pregnancy
35 to 39	Female	2028	412.300197341764	334.414428875971	499.487894372826	Incidence	Global	Ectopic pregnancy
35 to 39	Female	2029	403.524515217688	318.816539589516	499.697766277047	Incidence	Global	Ectopic pregnancy
35 to 39	Female	2030	394.570573695631	302.954274274949	500.334238669524	Incidence	Global	Ectopic pregnancy
35 to 39	Female	2031	385.439780894445	286.969576158124	501.282591708435	Incidence	Global	Ectopic pregnancy
35 to 39	Female	2032	376.171173287087	271.018199366766	502.478319460396	Incidence	Global	Ectopic pregnancy
35 to 39	Female	2033	366.911364233194	255.335753572012	503.977448095474	Incidence	Global	Ectopic pregnancy
35 to 39	Female	2034	357.832598965964	240.121304014511	505.93099759697	Incidence	Global	Ectopic pregnancy
35 to 39	Female	2035	349.092516580858	225.517844579748	508.526021644818	Incidence	Global	Ectopic pregnancy
35 to 39	Female	2036	340.79521971534	211.600594532516	511.916908478837	Incidence	Global	Ectopic pregnancy
35 to 39	Female	2037	332.93916411218	198.364758773815	516.121259484742	Incidence	Global	Ectopic pregnancy
35 to 39	Female	2038	325.414233739312	185.750926012454	520.968096178277	Incidence	Global	Ectopic pregnancy
35 to 39	Female	2039	318.184092590826	173.726399455637	526.42492494779	Incidence	Global	Ectopic pregnancy
35 to 39	Female	2040	311.259236339914	162.26940270179	532.567563099933	Incidence	Global	Ectopic pregnancy
35 to 39	Female	2041	304.671798962309	151.361005991364	539.53748132496	Incidence	Global	Ectopic pregnancy
35 to 39	Female	2042	298.431684232618	140.975085787846	547.443595416064	Incidence	Global	Ectopic pregnancy
35 to 39	Female	2043	292.540171613273	131.102981939722	556.335701066184	Incidence	Global	Ectopic pregnancy
35 to 39	Female	2044	286.998409098022	121.736528748747	566.261704420244	Incidence	Global	Ectopic pregnancy
40 to 44	Female	1990	317.603234043158	316.67109414662	318.535423386124	Incidence	Global	Ectopic pregnancy
40 to 44	Female	1991	302.366705533605	301.479053931427	303.254404738998	Incidence	Global	Ectopic pregnancy
40 to 44	Female	1992	290.221385343281	289.366434838827	291.076388193167	Incidence	Global	Ectopic pregnancy
40 to 44	Female	1993	278.661441668576	277.838824423809	279.484113072708	Incidence	Global	Ectopic pregnancy
40 to 44	Female	1994	270.219802746625	269.421194002426	271.018466118388	Incidence	Global	Ectopic pregnancy
40 to 44	Female	1995	263.121365499205	262.347851166268	263.894923833491	Incidence	Global	Ectopic pregnancy
40 to 44	Female	1996	257.399059058787	256.642255512746	258.155905937419	Incidence	Global	Ectopic pregnancy
40 to 44	Female	1997	252.524964471942	251.78190556345	253.26806723212	Incidence	Global	Ectopic pregnancy
40 to 44	Female	1998	248.97800458166	248.24450390192	249.711550499393	Incidence	Global	Ectopic pregnancy
40 to 44	Female	1999	246.580164790793	245.853235845065	247.307139685023	Incidence	Global	Ectopic pregnancy
40 to 44	Female	2000	244.966118798887	244.244824943846	245.687456381183	Incidence	Global	Ectopic pregnancy
40 to 44	Female	2001	242.92526471292	242.212424165664	243.638143198183	Incidence	Global	Ectopic pregnancy
40 to 44	Female	2002	239.556085839816	238.856644955096	240.255556361585	Incidence	Global	Ectopic pregnancy
40 to 44	Female	2003	235.041736416038	234.36056479067	235.722925968394	Incidence	Global	Ectopic pregnancy
40 to 44	Female	2004	230.72865119159	230.066317390306	231.390988930681	Incidence	Global	Ectopic pregnancy
40 to 44	Female	2005	227.439241224274	226.79332020663	228.085151409781	Incidence	Global	Ectopic pregnancy
40 to 44	Female	2006	225.573660791995	224.940052743314	226.207243622819	Incidence	Global	Ectopic pregnancy
40 to 44	Female	2007	224.815477625979	224.190761309905	225.440155168198	Incidence	Global	Ectopic pregnancy
40 to 44	Female	2008	225.325162292473	224.705155831692	225.945117799562	Incidence	Global	Ectopic pregnancy
40 to 44	Female	2009	226.732538545283	226.11458724608	227.350427106629	Incidence	Global	Ectopic pregnancy
40 to 44	Female	2010	228.91928696027	228.301605943384	229.536892828986	Incidence	Global	Ectopic pregnancy
40 to 44	Female	2011	231.885358940284	231.267074466881	232.503553598321	Incidence	Global	Ectopic pregnancy
40 to 44	Female	2012	235.751521567464	235.131173093077	236.371763887588	Incidence	Global	Ectopic pregnancy
40 to 44	Female	2013	239.653371141344	239.030721273728	240.275899160543	Incidence	Global	Ectopic pregnancy
40 to 44	Female	2014	242.903240326682	242.278649356062	243.527696706644	Incidence	Global	Ectopic pregnancy
40 to 44	Female	2015	244.871588825366	244.245959393825	245.497075839644	Incidence	Global	Ectopic pregnancy
40 to 44	Female	2016	245.622107514766	244.996125268243	246.247944309492	Incidence	Global	Ectopic pregnancy
40 to 44	Female	2017	245.440121424821	244.814636757398	246.065460686205	Incidence	Global	Ectopic pregnancy
40 to 44	Female	2018	244.343283274618	243.719853843897	244.966569167493	Incidence	Global	Ectopic pregnancy
40 to 44	Female	2019	242.386612501315	241.767463953361	243.00561983526	Incidence	Global	Ectopic pregnancy
40 to 44	Female	2020	238.557826087091	237.946632830664	239.168883385972	Incidence	Global	Ectopic pregnancy
40 to 44	Female	2021	236.707412556475	236.102288917364	237.312399073504	Incidence	Global	Ectopic pregnancy
40 to 44	Female	2022	230.847812236045	205.726501907451	258.087204809015	Incidence	Global	Ectopic pregnancy
40 to 44	Female	2023	228.494848206477	202.171304410377	257.09033911243	Incidence	Global	Ectopic pregnancy
40 to 44	Female	2024	225.984806120985	197.844184258363	256.613235316991	Incidence	Global	Ectopic pregnancy
40 to 44	Female	2025	223.333277124733	192.779230283938	256.690309334922	Incidence	Global	Ectopic pregnancy
40 to 44	Female	2026	220.550574420513	187.056737177819	257.311840007176	Incidence	Global	Ectopic pregnancy
40 to 44	Female	2027	217.646113352912	180.788687490721	258.435337407133	Incidence	Global	Ectopic pregnancy
40 to 44	Female	2028	214.65183956377	174.131249527625	260.009112326987	Incidence	Global	Ectopic pregnancy
40 to 44	Female	2029	211.535990469975	167.164001726469	261.921373241184	Incidence	Global	Ectopic pregnancy
40 to 44	Female	2030	208.243628558215	159.929385000549	264.042404802236	Incidence	Global	Ectopic pregnancy
40 to 44	Female	2031	204.737860549156	152.47238552825	266.268364110479	Incidence	Global	Ectopic pregnancy
40 to 44	Female	2032	201.026467294696	144.867723704089	268.548008422803	Incidence	Global	Ectopic pregnancy
40 to 44	Female	2033	197.213563738568	137.262380407925	270.94338903841	Incidence	Global	Ectopic pregnancy
40 to 44	Female	2034	193.329847074926	129.72648955937	273.445149239659	Incidence	Global	Ectopic pregnancy
40 to 44	Female	2035	189.371992152577	122.29247571373	276.012017873196	Incidence	Global	Ectopic pregnancy
40 to 44	Female	2036	185.338994350838	114.987581051522	278.611589779761	Incidence	Global	Ectopic pregnancy
40 to 44	Female	2037	181.247795695044	107.849380979424	281.235017977092	Incidence	Global	Ectopic pregnancy
40 to 44	Female	2038	177.166875633182	100.949790519018	283.939967198401	Incidence	Global	Ectopic pregnancy
40 to 44	Female	2039	173.177947059445	94.3496825650186	286.831319333731	Incidence	Global	Ectopic pregnancy
40 to 44	Female	2040	169.356655162282	88.0902295149669	290.030974329672	Incidence	Global	Ectopic pregnancy
40 to 44	Female	2041	165.753592833295	82.187859667514	293.640733935802	Incidence	Global	Ectopic pregnancy
40 to 44	Female	2042	162.368475335727	76.6293932444653	297.683199572466	Incidence	Global	Ectopic pregnancy
40 to 44	Female	2043	159.147743998943	71.3818984340598	302.071333445272	Incidence	Global	Ectopic pregnancy
40 to 44	Female	2044	156.073805085409	66.4252037070735	306.79086594391	Incidence	Global	Ectopic pregnancy
45 to 49	Female	1990	143.19837169403	142.504325684066	143.893438870245	Incidence	Global	Ectopic pregnancy
45 to 49	Female	1991	137.684540678786	137.008708294248	138.36139852893	Incidence	Global	Ectopic pregnancy
45 to 49	Female	1992	129.669680245305	129.024971488612	130.315397657852	Incidence	Global	Ectopic pregnancy
45 to 49	Female	1993	121.904902324425	121.291038805108	122.519755328376	Incidence	Global	Ectopic pregnancy
45 to 49	Female	1994	113.799383780627	113.22053395498	114.379188460552	Incidence	Global	Ectopic pregnancy
45 to 49	Female	1995	108.290114529611	107.736444465737	108.844708809275	Incidence	Global	Ectopic pregnancy
45 to 49	Female	1996	104.414857512663	103.88402052778	104.946569384073	Incidence	Global	Ectopic pregnancy
45 to 49	Female	1997	101.382079925096	100.86759137256	101.897413111784	Incidence	Global	Ectopic pregnancy
45 to 49	Female	1998	98.0349028508017	97.5379657081558	98.5326537626212	Incidence	Global	Ectopic pregnancy
45 to 49	Female	1999	95.3830871414167	94.899759042892	95.8672061959569	Incidence	Global	Ectopic pregnancy
45 to 49	Female	2000	92.2472401573784	91.7807861372842	92.7144538068383	Incidence	Global	Ectopic pregnancy
45 to 49	Female	2001	89.8424330415963	89.3873427069632	90.2982675211764	Incidence	Global	Ectopic pregnancy
45 to 49	Female	2002	88.4364980227578	87.9892503067458	88.8844744406233	Incidence	Global	Ectopic pregnancy
45 to 49	Female	2003	87.683695340446	87.2413367035452	88.1267707786409	Incidence	Global	Ectopic pregnancy
45 to 49	Female	2004	87.0564619011053	86.6179092739835	87.4957228620396	Incidence	Global	Ectopic pregnancy
45 to 49	Female	2005	86.1135035344451	85.6796527132468	86.5480553247094	Incidence	Global	Ectopic pregnancy
45 to 49	Female	2006	84.4118646993963	83.9859049858681	84.8385151433377	Incidence	Global	Ectopic pregnancy
45 to 49	Female	2007	81.992138758949	81.5776539964828	82.4072982561047	Incidence	Global	Ectopic pregnancy
45 to 49	Female	2008	79.1999662566323	78.799782595173	79.6008004278699	Incidence	Global	Ectopic pregnancy
45 to 49	Female	2009	76.5938215756008	76.2079047267944	76.9803613446057	Incidence	Global	Ectopic pregnancy
45 to 49	Female	2010	74.6258970409064	74.2519656073337	75.0004240788059	Incidence	Global	Ectopic pregnancy
45 to 49	Female	2011	73.3720164108543	73.0069545271554	73.7376499989437	Incidence	Global	Ectopic pregnancy
45 to 49	Female	2012	72.4115421455847	72.0534940141441	72.770142580119	Incidence	Global	Ectopic pregnancy
45 to 49	Female	2013	71.7363371944208	71.383132123591	72.090081399197	Incidence	Global	Ectopic pregnancy
45 to 49	Female	2014	71.2054850457508	70.8558816193827	71.5556183171296	Incidence	Global	Ectopic pregnancy
45 to 49	Female	2015	70.7004	70.3539422916839	71.0474616626985	Incidence	Global	Ectopic pregnancy
45 to 49	Female	2016	70.1232756205555	69.7801549806309	70.4669117034169	Incidence	Global	Ectopic pregnancy
45 to 49	Female	2017	69.642803334298	69.3026045770797	69.983510980053	Incidence	Global	Ectopic pregnancy
45 to 49	Female	2018	69.1463453384262	68.8089358832486	69.4842581273522	Incidence	Global	Ectopic pregnancy
45 to 49	Female	2019	68.5567685730079	68.2220581087454	68.8919789318572	Incidence	Global	Ectopic pregnancy
45 to 49	Female	2020	67.4886985194768	67.1573961920881	67.8205021076108	Incidence	Global	Ectopic pregnancy
45 to 49	Female	2021	67.0913071533939	66.7612492194227	67.4218670640001	Incidence	Global	Ectopic pregnancy
45 to 49	Female	2022	77.8566773061505	69.3760322924991	87.0564839749694	Incidence	Global	Ectopic pregnancy
45 to 49	Female	2023	77.6168774933369	68.6688899793316	87.3402982870791	Incidence	Global	Ectopic pregnancy
45 to 49	Female	2024	77.2586522730371	67.6336775764317	87.7387687560762	Incidence	Global	Ectopic pregnancy
45 to 49	Female	2025	76.7825103391617	66.2751189963616	88.2602715381791	Incidence	Global	Ectopic pregnancy
45 to 49	Female	2026	76.2070668189316	64.6320058118191	88.9197196276554	Incidence	Global	Ectopic pregnancy
45 to 49	Female	2027	75.5541486833985	62.7577359169484	89.7248923448672	Incidence	Global	Ectopic pregnancy
45 to 49	Female	2028	74.8466151809382	60.7158715174366	90.6731255234593	Incidence	Global	Ectopic pregnancy
45 to 49	Female	2029	74.0961927191676	58.5521501755304	91.7550567896146	Incidence	Global	Ectopic pregnancy
45 to 49	Female	2030	73.3075479370941	56.2986143823123	92.958792818774	Incidence	Global	Ectopic pregnancy
45 to 49	Female	2031	72.4836	53.9801610924303	94.2742470765173	Incidence	Global	Ectopic pregnancy
45 to 49	Female	2032	71.6270071531385	51.6191332094186	95.6910459484728	Incidence	Global	Ectopic pregnancy
45 to 49	Female	2033	70.7473703081376	49.2449092664706	97.2023955013722	Incidence	Global	Ectopic pregnancy
45 to 49	Female	2034	69.8338009017757	46.8658185699547	98.7799496495344	Incidence	Global	Ectopic pregnancy
45 to 49	Female	2035	68.8676793994988	44.4818978986327	100.386617646232	Incidence	Global	Ectopic pregnancy
45 to 49	Female	2036	67.8362478804417	42.0963217938462	101.992579758049	Incidence	Global	Ectopic pregnancy
45 to 49	Female	2037	66.7413909129147	39.7222037308089	103.586319211759	Incidence	Global	Ectopic pregnancy
45 to 49	Female	2038	65.616811669461	37.3932557687495	105.199727069034	Incidence	Global	Ectopic pregnancy
45 to 49	Female	2039	64.4720816410795	35.1231284285912	106.835231642771	Incidence	Global	Ectopic pregnancy
45 to 49	Female	2040	63.3055467295421	32.9161639794794	108.480986784973	Incidence	Global	Ectopic pregnancy
45 to 49	Female	2041	62.1163413710202	30.7759915448816	110.127347488692	Incidence	Global	Ectopic pregnancy
45 to 49	Female	2042	60.909575792066	28.7093651240565	111.773595440316	Incidence	Global	Ectopic pregnancy
45 to 49	Female	2043	59.7076076976646	26.7322088825898	113.446144181693	Incidence	Global	Ectopic pregnancy
45 to 49	Female	2044	58.5376021636794	24.8577812894791	115.189518540482	Incidence	Global	Ectopic pregnancy
15 to 19	Female	1990	3212.53326906497	3210.33468170509	3214.72831669523	Incidence	Global	Maternal abortion and miscarriage
15 to 19	Female	1991	3146.20817085717	3144.03131558646	3148.38153346331	Incidence	Global	Maternal abortion and miscarriage
15 to 19	Female	1992	3088.46956054498	3086.31	3090.62442964455	Incidence	Global	Maternal abortion and miscarriage
15 to 19	Female	1993	3037.13936276845	3034.99923626966	3039.27607566759	Incidence	Global	Maternal abortion and miscarriage
15 to 19	Female	1994	2989.61974728585	2987.50026235764	2991.73585825634	Incidence	Global	Maternal abortion and miscarriage
15 to 19	Female	1995	2946.69015515403	2944.59410475433	2948.78287257525	Incidence	Global	Maternal abortion and miscarriage
15 to 19	Female	1996	2902.24880359827	2900.17992029928	2904.31439945485	Incidence	Global	Maternal abortion and miscarriage
15 to 19	Female	1997	2851.30914241151	2849.27202747371	2853.34302278271	Incidence	Global	Maternal abortion and miscarriage
15 to 19	Female	1998	2795.90852699516	2793.90700497161	2797.90687307275	Incidence	Global	Maternal abortion and miscarriage
15 to 19	Female	1999	2738.44505127099	2736.48168942179	2740.40529929978	Incidence	Global	Maternal abortion and miscarriage
15 to 19	Female	2000	2681.28344183705	2679.35974928165	2683.20408418117	Incidence	Global	Maternal abortion and miscarriage
15 to 19	Female	2001	2625.06595768778	2623.18335821292	2626.94557170777	Incidence	Global	Maternal abortion and miscarriage
15 to 19	Female	2002	2572.69800083271	2570.85454840857	2574.53852904089	Incidence	Global	Maternal abortion and miscarriage
15 to 19	Female	2003	2527.92277092143	2526.11282194575	2529.72984807833	Incidence	Global	Maternal abortion and miscarriage
15 to 19	Female	2004	2491.92832394229	2490.14442625453	2493.70939099926	Incidence	Global	Maternal abortion and miscarriage
15 to 19	Female	2005	2463.75884680286	2461.99306476494	2465.52182804135	Incidence	Global	Maternal abortion and miscarriage
15 to 19	Female	2006	2447.08275517927	2445.32510319926	2448.83762128433	Incidence	Global	Maternal abortion and miscarriage
15 to 19	Female	2007	2440.10387904058	2438.34654879683	2441.85842641668	Incidence	Global	Maternal abortion and miscarriage
15 to 19	Female	2008	2435.96678567249	2434.20594932146	2437.72483706701	Incidence	Global	Maternal abortion and miscarriage
15 to 19	Female	2009	2427.68142841012	2425.91706290595	2429.44300848472	Incidence	Global	Maternal abortion and miscarriage
15 to 19	Female	2010	2407.82104287409	2406.05682551714	2409.58248276463	Incidence	Global	Maternal abortion and miscarriage
15 to 19	Female	2011	2363.00964047405	2361.25649852768	2364.76003430381	Incidence	Global	Maternal abortion and miscarriage
15 to 19	Female	2012	2292.84357985239	2291.1134325284	2294.57103128767	Incidence	Global	Maternal abortion and miscarriage
15 to 19	Female	2013	2208.57632308376	2206.8763928624	2210.27	Incidence	Global	Maternal abortion and miscarriage
15 to 19	Female	2014	2121.54148514298	2119.8744324381	2123.20597863876	Incidence	Global	Maternal abortion and miscarriage
15 to 19	Female	2015	2043.00265526643	2041.3669061462	2044.63591120371	Incidence	Global	Maternal abortion and miscarriage
15 to 19	Female	2016	1968.42355859223	1966.81887795887	1970.02581063068	Incidence	Global	Maternal abortion and miscarriage
15 to 19	Female	2017	1888.7755107084	1887.20555997893	1890.34310392984	Incidence	Global	Maternal abortion and miscarriage
15 to 19	Female	2018	1809.62721144145	1808.09384996903	1811.15828860825	Incidence	Global	Maternal abortion and miscarriage
15 to 19	Female	2019	1736.61676516709	1735.11951851169	1738.11179770213	Incidence	Global	Maternal abortion and miscarriage
15 to 19	Female	2020	1672.43092211192	1670.96778369699	1673.89191055394	Incidence	Global	Maternal abortion and miscarriage
15 to 19	Female	2021	1625.32619796774	1623.89170352806	1626.75859271059	Incidence	Global	Maternal abortion and miscarriage
15 to 19	Female	2022	1575.71241069762	1408.91513703998	1756.02803792478	Incidence	Global	Maternal abortion and miscarriage
15 to 19	Female	2023	1523.39169909022	1337.91728463348	1726.24134005974	Incidence	Global	Maternal abortion and miscarriage
15 to 19	Female	2024	1473.22084860118	1263.72378750438	1706.0780389891	Incidence	Global	Maternal abortion and miscarriage
15 to 19	Female	2025	1425.18757128454	1188.12838538816	1694.03509195524	Incidence	Global	Maternal abortion and miscarriage
15 to 19	Female	2026	1379.27328489648	1112.65237538741	1688.78908801712	Incidence	Global	Maternal abortion and miscarriage
15 to 19	Female	2027	1335.45419767045	1038.43407957389	1689.33751316043	Incidence	Global	Maternal abortion and miscarriage
15 to 19	Female	2028	1293.70226937475	966.278584514665	1694.96765433322	Incidence	Global	Maternal abortion and miscarriage
15 to 19	Female	2029	1253.98606458697	896.737716047164	1705.18709150601	Incidence	Global	Maternal abortion and miscarriage
15 to 19	Female	2030	1216.27154048531	830.178208510494	1719.66243110181	Incidence	Global	Maternal abortion and miscarriage
15 to 19	Female	2031	1180.52278284589	766.831860895715	1738.17480737527	Incidence	Global	Maternal abortion and miscarriage
15 to 19	Female	2032	1146.70269479644	706.831037487534	1760.58958579327	Incidence	Global	Maternal abortion and miscarriage
15 to 19	Female	2033	1114.77364637072	650.23384998899	1786.83614663117	Incidence	Global	Maternal abortion and miscarriage
15 to 19	Female	2034	1084.69808224568	597.042360977554	1816.89441682627	Incidence	Global	Maternal abortion and miscarriage
15 to 19	Female	2035	1056.43909251913	547.216067401361	1850.78586937575	Incidence	Global	Maternal abortion and miscarriage
15 to 19	Female	2036	1029.96095166628	500.682136450275	1888.5675107013	Incidence	Global	Maternal abortion and miscarriage
15 to 19	Female	2037	1005.22963071903	457.343349666779	1930.32789479867	Incidence	Global	Maternal abortion and miscarriage
15 to 19	Female	2038	982.213288233561	417.08437788602	1976.1845628725	Incidence	Global	Maternal abortion and miscarriage
15 to 19	Female	2039	960.882746126829	379.776807519414	2026.28250749115	Incidence	Global	Maternal abortion and miscarriage
15 to 19	Female	2040	941.211956974266	345.283205610474	2080.79339839202	Incidence	Global	Maternal abortion and miscarriage
15 to 19	Female	2041	923.178469923123	313.460426136544	2139.91540121415	Incidence	Global	Maternal abortion and miscarriage
15 to 19	Female	2042	906.763902994449	284.162305187824	2203.87347456825	Incidence	Global	Maternal abortion and miscarriage
15 to 19	Female	2043	891.954429971673	257.241855673106	2272.92006979879	Incidence	Global	Maternal abortion and miscarriage
15 to 19	Female	2044	878.741291586834	232.553046738067	2347.33618670155	Incidence	Global	Maternal abortion and miscarriage
20 to 24	Female	1990	7715.87750253665	7712.39114872391	7719.35764518878	Incidence	Global	Maternal abortion and miscarriage
20 to 24	Female	1991	7502.72091998755	7499.29739039245	7506.13836160612	Incidence	Global	Maternal abortion and miscarriage
20 to 24	Female	1992	7305.45654868375	7302.08955863537	7308.81756268552	Incidence	Global	Maternal abortion and miscarriage
20 to 24	Female	1993	7128.75858326942	7125.44180598044	7132.06948435179	Incidence	Global	Maternal abortion and miscarriage
20 to 24	Female	1994	6971.87138895401	6968.59770112423	6975.13928727456	Incidence	Global	Maternal abortion and miscarriage
20 to 24	Female	1995	6834.83146771865	6831.59391797084	6838.06330172295	Incidence	Global	Maternal abortion and miscarriage
20 to 24	Female	1996	6709.71275744004	6706.50609347612	6712.91377019261	Incidence	Global	Maternal abortion and miscarriage
20 to 24	Female	1997	6585.43968229841	6582.26302385656	6588.61075286432	Incidence	Global	Maternal abortion and miscarriage
20 to 24	Female	1998	6465.87994151161	6462.73488489563	6469.01947519207	Incidence	Global	Maternal abortion and miscarriage
20 to 24	Female	1999	6353.85081250805	6350.74128370379	6356.95488761177	Incidence	Global	Maternal abortion and miscarriage
20 to 24	Female	2000	6252.18037106228	6249.10998562446	6255.24537529598	Incidence	Global	Maternal abortion and miscarriage
20 to 24	Female	2001	6152.84828932815	6149.82037068177	6155.8709034898	Incidence	Global	Maternal abortion and miscarriage
20 to 24	Female	2002	6053.32542112607	6050.34335454509	6056.30226468451	Incidence	Global	Maternal abortion and miscarriage
20 to 24	Female	2003	5956.12674643245	5953.1934740519	5959.05488092171	Incidence	Global	Maternal abortion and miscarriage
20 to 24	Female	2004	5862.06737759837	5859.18524082093	5864.94446430722	Incidence	Global	Maternal abortion and miscarriage
20 to 24	Female	2005	5770.75011401669	5767.92128077043	5773.57398755305	Incidence	Global	Maternal abortion and miscarriage
20 to 24	Female	2006	5668.02767737194	5665.25771256946	5670.7927826067	Incidence	Global	Maternal abortion and miscarriage
20 to 24	Female	2007	5548.18272090864	5545.47465471146	5550.8860349321	Incidence	Global	Maternal abortion and miscarriage
20 to 24	Female	2008	5425.46901860758	5422.81911213782	5428.11427558924	Incidence	Global	Maternal abortion and miscarriage
[truncated: 311 more rows]
