# Supplementary material for: Maternal Disorders among Women Aged 15 to 49 Years Global Trends, Inequalities, and Projections from the GBD Study 2021
Source: Research Square preprint supplement (doi:10.21203/rs.3.rs-5848433/v1), 2025-04-04
Supplement: Supplementary file 6 [file 8b9a522e0610d0fdc16ee2da.xlsx]

## Sheet: Table S1
location	DALYs Number-1990	DALYs Rate-1990	DALYs Number-2021	DALYs Rate-2021	Incidence-Number-1990	Incidence-Rate-1990	Incidence-Number-2021	Incidence-Rate-2021
Myanmar	142547.38(192278.77~105177.93)	1367.74(1844.91~1009.18)	97152.38(135872.84~66022.83)	642.63(898.75~436.72)	702601.78(811200.38~614073.04)	6741.44(7783.44~5892.01)	573334.9(658390.52~501013)	3792.42(4355.04~3314.04)
Global	21522506.53(23544495.07~19583487.22)	1609.33(1760.52~1464.34)	12140724.76(14262732.92~10455042.76)	622.97(731.85~536.47)	123564463.32(141488077.44~107240152.78)	9239.42(10579.64~8018.78)	111184451.56(124819663.68~98155262.47)	5705.12(6404.77~5036.56)
Philippines	122594.59(153318.45~95427.7)	789.95(987.92~614.9)	114627.03(151739.6~87482.45)	391.05(517.65~298.44)	1751932.22(2006456.95~1547118.16)	11288.77(12928.83~9969.03)	2147508.31(2459597.59~1888818.28)	7326.14(8390.82~6443.63)
Samoa	148.98(230.04~84.4)	404.01(623.86~228.9)	118.36(188.87~73.23)	243.27(388.2~150.53)	2348.08(2715.5~2006.16)	6367.83(7364.24~5440.56)	3255.31(3736.82~2862.14)	6691.03(7680.73~5882.9)
Turkmenistan	3864.75(4801.45~3166.82)	437.26(543.24~358.3)	4150.97(5843.87~2981.87)	330.33(465.05~237.3)	81589.7(96017.22~68774.41)	9231.12(10863.46~7781.19)	69732(83195.34~59468.69)	5549.23(6620.63~4732.48)
Tajikistan	8534.23(10449.94~7008.65)	707.88(866.78~581.34)	4846.98(6757.08~3303.69)	190.72(265.88~129.99)	132649.75(156053.89~113219.61)	11002.82(12944.11~9391.16)	158445.84(188125.61~133067.7)	6234.6(7402.45~5236.01)
Poland	7218.63(8840.01~5983.63)	76.85(94.11~63.7)	1404.31(1893.79~990.45)	15.91(21.45~11.22)	453988.26(518290.07~399752.12)	4833.03(5517.57~4255.65)	208821.47(233317.03~187225.78)	2365.43(2642.9~2120.8)
Solomon Islands	2225.86(3541.99~998.72)	2990.95(4759.48~1342.01)	3891.16(5689.43~2473.8)	2269.62(3318.51~1442.91)	8985.83(10382.78~7844.36)	12074.52(13951.63~10540.69)	12769.37(14540.41~11171.64)	7448.06(8481.07~6516.15)
Russian Federation	72493.91(84262.32~61689.95)	195.79(227.58~166.61)	18636.22(23980.92~14564.8)	54.98(70.75~42.97)	3154747.62(3673558.98~2708782.33)	8520.45(9921.67~7315.97)	2654083.16(3029367.68~2299253.56)	7830.6(8937.84~6783.71)
Thailand	38873.33(59791.86~22615.44)	243.11(373.93~141.43)	20866.79(31539.36~13224.11)	128.01(193.48~81.12)	756592.59(907637.09~629783.69)	4731.61(5676.22~3938.57)	440338.42(521570.3~373293.48)	2701.23(3199.54~2289.94)
Ukraine	17522.65(20074.81~15516.99)	138.43(158.59~122.58)	4246(5854.47~2778.92)	42.02(57.93~27.5)	1041267.33(1213407.78~882921.97)	8225.86(9585.74~6974.95)	538974.47(616972.33~466508.24)	5333.61(6105.46~4616.49)
Belgium	937.68(1177.82~732.49)	38.52(48.38~30.09)	655.66(876.76~463.72)	26.46(35.39~18.72)	110710.99(126928.52~93932.58)	4547.65(5213.81~3858.45)	98961.43(112193.83~84936.3)	3994.27(4528.35~3428.19)
China	1022619.95(1364940.6~713999.35)	317.38(423.62~221.59)	123557.54(160504.78~94628.24)	38.77(50.36~29.69)	22095329.97(26370115.55~18040777.51)	6857.42(8184.12~5599.06)	9599260.04(10816384.48~8449420.59)	3012.03(3393.94~2651.24)
Romania	15111.82(17637.3~12757.86)	268.74(313.65~226.88)	1977.06(2466.62~1560.84)	48.69(60.75~38.44)	243233.28(275052.81~213498.37)	4325.55(4891.41~3796.76)	139935.16(156772.08~123765.89)	3446.18(3860.82~3047.98)
Italy	4904.68(5907.75~3946.31)	34.32(41.33~27.61)	1990.63(2550.75~1448.3)	16.41(21.02~11.94)	611907.78(718831.1~510532.95)	4281.22(5029.31~3571.95)	388819.15(426671.91~353783.01)	3204.55(3516.53~2915.79)
Vanuatu	286.52(495.65~155.85)	817.18(1413.65~444.51)	440.33(696.93~261.89)	561.53(888.75~333.98)	4548.65(5279.86~3924.92)	12973.3(15058.79~11194.35)	6365.33(7445.79~5513.21)	8117.34(9495.19~7030.68)
Brunei Darussalam	190.35(295.08~113.08)	281.74(436.76~167.37)	86.31(129.45~58.04)	69.08(103.61~46.46)	2576.36(3139.05~2119.77)	3813.31(4646.16~3137.5)	2275.76(2760.66~1867.43)	1821.5(2209.61~1494.67)
Austria	783.12(986.21~583.15)	39.57(49.84~29.47)	434.81(578.84~299.4)	22.02(29.32~15.16)	147265.36(161429.26~133606.03)	7441.86(8157.61~6751.6)	101278.4(112344.66~90190.63)	5129.29(5689.75~4567.75)
United States of America	49857.83(59585.95~41369.92)	74.42(88.94~61.75)	76577.49(90122.7~66001.83)	101.14(119.03~87.17)	3932095.78(4310333.2~3541577.51)	5869.26(6433.84~5286.35)	2890931.46(3176192.66~2627375.02)	3818.22(4194.98~3470.12)
Sri Lanka	18748.69(26574.81~12253.64)	408.39(578.86~266.91)	5178.56(7496.03~3551.18)	91.7(132.74~62.88)	211952.25(244649.64~182775.95)	4616.84(5329.07~3981.31)	176399.86(202894.84~153519.35)	3123.72(3592.89~2718.55)
Andorra	4.27(6.24~2.7)	28.64(41.79~18.06)	3.1(4.51~2.02)	15.5(22.54~10.1)	440.45(501.53~369.75)	2951.44(3360.74~2477.68)	421.87(482~358.81)	2110.67(2411.54~1795.2)
Haiti	68748.82(92530.23~49822.14)	4468.28(6013.94~3238.16)	86072.78(126624.6~53439.1)	2431.44(3576.98~1509.58)	244741.81(284071.65~210288.17)	15906.83(18463.04~13667.54)	315212.34(362872.98~272250.61)	8904.33(10250.68~7690.72)
Viet Nam	58877.76(93405.15~31269.94)	345.03(547.37~183.25)	19805.23(30064.21~12853.11)	77.54(117.71~50.32)	1583205.35(1885883.6~1312909.87)	9277.82(11051.56~7693.85)	986533.53(1107194.02~873087.16)	3862.46(4334.86~3418.29)
Costa Rica	1717.21(1986.86~1469.51)	220.83(255.5~188.97)	1104.72(1335.52~922.27)	85.34(103.17~71.24)	92334.65(110259.37~76922.33)	11873.83(14178.87~9891.88)	69611.9(81778.19~58866.25)	5377.38(6317.2~4547.3)
Chile	9199.13(10521.17~8083.06)	254.5(291.08~223.63)	4046.87(4845.03~3334.38)	85.92(102.86~70.79)	281790.64(312448.3~248678.73)	7796.06(8644.24~6879.98)	263327.81(286164.8~238764.3)	5590.62(6075.46~5069.12)
Taiwan (Province of China)	3565.52(4112.92~3044.88)	64.8(74.75~55.34)	1097.39(1325.61~897.89)	19.53(23.6~15.98)	196313.02(234052.09~165267.95)	3567.9(4253.79~3003.67)	96753.67(111325.97~83692.05)	1722.32(1981.72~1489.81)
Norway	419.23(537.56~321.96)	39.72(50.93~30.5)	266.7(376.36~181.06)	22.02(31.08~14.95)	49824.92(58543.31~41647.39)	4720.63(5546.64~3945.85)	47679.72(57267.41~39140.99)	3936.85(4728.49~3231.81)
Denmark	408.79(513.52~317.52)	31.31(39.33~24.32)	251.98(335.28~174.92)	19.95(26.55~13.85)	57245.09(63475.75~50882.96)	4384.32(4861.52~3897.06)	55159.15(63605.59~46919.2)	4367.12(5035.85~3714.73)
Tonga	187.98(276.08~120.84)	840.33(1234.19~540.2)	158.59(247.5~94.57)	627.26(978.88~374.02)	2428.93(2777.25~2107.32)	10858.31(12415.43~9420.58)	1650.4(1870.66~1436.37)	6527.52(7398.68~5681.04)
Ghana	91494.23(130366.72~58636.81)	2594.22(3696.41~1662.58)	108894.73(154017.19~77530.17)	1192.67(1686.88~849.15)	487171.98(546492.87~431052.51)	13813.25(15495.23~12222.04)	818065.7(921061.17~720104.86)	8959.88(10087.94~7886.96)
Namibia	7014.76(9563.42~4871.2)	2068.62(2820.2~1436.49)	4021.57(7258.55~2188.58)	608.12(1097.6~330.94)	43777.06(50670.22~37716.99)	12909.62(14942.37~11122.54)	50562(58334.47~43770.38)	7645.7(8821~6618.71)
Uzbekistan	18739.91(22613.23~15139.27)	382.55(461.62~309.05)	12467.68(15914.81~9652.92)	140.11(178.85~108.48)	479961.68(566212.56~405485.9)	9797.71(11558.39~8277.4)	472825.67(559919.91~399846.68)	5313.46(6292.19~4493.34)
Cook Islands	2.92(4.18~1.92)	63.64(91.06~41.81)	1.25(1.81~0.85)	29.04(42.05~19.62)	322.67(374.63~279.26)	7023.96(8154.98~6079.02)	135.3(155.01~119.13)	3141.16(3598.85~2765.78)
Malawi	100785.94(131662.72~76752.1)	4463.69(5831.19~3399.26)	84134.71(130402.77~51665.33)	1679.58(2603.23~1031.39)	394819.55(449332.57~348904.51)	17486.1(19900.42~15452.58)	467115.28(530433.67~413878.19)	9325.01(10589.03~8262.24)
Slovakia	893.79(1171.52~641.74)	67.38(88.32~48.38)	324.17(444.15~234.74)	25.68(35.19~18.6)	59245.94(69562.65~50233.38)	4466.33(5244.06~3786.9)	36525.25(41595.41~31639.03)	2893.72(3295.41~2506.61)
Dominica	48.3(62.19~37.05)	283.5(365.06~217.5)	38.19(57.59~22.81)	232.36(350.35~138.74)	1940.53(2290.24~1662.97)	11391.26(13444.08~9761.9)	713.89(825.36~622.25)	4343.16(5021.36~3785.66)
Congo	24220.63(34673.15~15430.5)	4297.09(6151.52~2737.59)	26653.15(41715.19~16335.4)	1860.25(2911.5~1140.13)	68793.8(76787.01~61279.81)	12205.01(13623.13~10871.92)	92806.38(104465.7~82522.31)	6477.4(7291.16~5759.63)
Bosnia and Herzegovina	1054.87(1332.99~772.95)	90.61(114.49~66.39)	157.22(222.68~108.49)	21.49(30.44~14.83)	45684.93(52814.44~39282.92)	3924.01(4536.38~3374.12)	16949.51(19465.55~14860.58)	2316.76(2660.67~2031.23)
Indonesia	1293238.03(1491361.07~1090083.98)	2698.49(3111.89~2274.58)	374409.14(519078.97~283792.48)	497.27(689.41~376.91)	3413684.57(3956918.18~2929047.62)	7123.04(8256.56~6111.79)	2575380.21(2925399.35~2276721.03)	3420.45(3885.32~3023.79)
Kiribati	344.81(505.16~231.94)	1844.62(2702.42~1240.77)	317.57(498.08~186.08)	993.28(1557.89~582.03)	1659.01(1907.21~1437.54)	8875.11(10202.88~7690.32)	1773.17(2027.69~1543.66)	5546.14(6342.24~4828.29)
Serbia	2276.94(3051.28~1575.54)	97.52(130.68~67.48)	543.63(725.06~395.01)	26.74(35.67~19.43)	85890.45(99607.37~74095.6)	3678.51(4265.98~3173.36)	50105.16(57415.28~43398.06)	2464.91(2824.53~2134.95)
Guyana	1486.49(1875.12~1109.47)	727.78(918.04~543.19)	1600.93(2212.06~1082.14)	787.88(1088.64~532.57)	42911.48(50094.53~34743.01)	21009.13(24525.9~17009.91)	21542.02(25536.83~17760.23)	10601.69(12567.69~8740.52)
Czechia	1432.17(1752.39~1183.54)	55.63(68.07~45.97)	466.27(676.9~321.27)	20.33(29.51~14.01)	88468.26(102971.33~75552.76)	3436.23(3999.55~2934.58)	64495.61(73932.55~56314.36)	2811.61(3223.01~2454.96)
Georgia	2579.84(3047.32~2188.45)	187.95(222.01~159.44)	618.91(739.68~502.16)	78.64(93.99~63.81)	63146.92(76210.15~52547.67)	4600.49(5552.19~3828.29)	33057.28(37359.11~28886.34)	4200.58(4747.22~3670.58)
Cyprus	132.94(183.34~87.52)	67.3(92.81~44.31)	78.16(107.81~54.16)	21.88(30.19~15.17)	12233.46(14345.58~10200.04)	6193.24(7262.51~5163.81)	11114.79(13079.82~9484.33)	3112.33(3662.57~2655.77)
San Marino	1.47(2.07~0.96)	23.61(33.29~15.37)	1.23(1.78~0.8)	17.29(24.94~11.3)	187.38(214.59~157.23)	3012.27(3449.72~2527.62)	175.51(200.51~147.8)	2464.36(2815.43~2075.24)
Lebanon	2287.69(3497.66~1420.37)	305.28(466.75~189.54)	970.67(1444.76~643.77)	65.43(97.38~43.39)	65924.84(77005.39~56425.18)	8797.35(10275.99~7529.66)	50741.02(58186.89~43906.05)	3420.13(3922.01~2959.43)
Ecuador	25808.39(29313.52~22989.02)	1023.29(1162.27~911.51)	17497.33(22536.47~13148.99)	371.05(477.92~278.84)	415451.89(477221.81~359090.82)	16472.51(18921.66~14237.81)	496652.21(535161.24~461591.7)	10532.19(11348.83~9788.69)
Micronesia (Federated States of)	305.12(476.35~176.15)	1315.84(2054.27~759.63)	146.74(243.32~80.45)	561.14(930.47~307.66)	2029.76(2319.47~1772.9)	8753.33(10002.7~7645.64)	1204.98(1369.07~1051.51)	4607.96(5235.45~4021.07)
Republic of Korea	9597.87(11689.07~7621.59)	75.96(92.51~60.32)	1877.87(2467.98~1411.83)	16.2(21.29~12.18)	255544.52(315851.51~204255.52)	2022.52(2499.82~1616.59)	108227.06(131017.79~87762.91)	933.58(1130.17~757.05)
Central African Republic	49973.24(63738.12~35853.94)	7796.3(9943.75~5593.56)	58209.39(88104.17~36231.14)	4207.53(6368.4~2618.88)	96199.94(109346.52~85255.23)	15008.11(17059.1~13300.63)	134671.8(151566.98~117882.4)	9734.43(10955.65~8520.85)
Barbados	137.52(162.66~114.57)	200.71(237.41~167.22)	104.15(135.17~81)	146.3(189.87~113.77)	5884.43(7004.56~4833.17)	8588.6(10223.49~7054.24)	3651.35(4263.27~3045.91)	5129.1(5988.66~4278.62)
Colombia	54806.33(66528.22~43549.92)	631.06(766.03~501.45)	29473.91(37416.99~22126.25)	224.99(285.62~168.9)	883955.64(1044110.55~740991.89)	10178.18(12022.26~8532.04)	1085506.54(1263789.05~909373.54)	8286.07(9646.96~6941.58)
Malta	60.24(73.08~49.82)	63.52(77.06~52.53)	35.81(45.12~28.47)	37.98(47.86~30.2)	4208.13(4847.78~3575.73)	4437.25(5111.73~3770.42)	3073.98(3538.76~2611.24)	3260.72(3753.73~2769.87)
Trinidad and Tobago	961.73(1122~826.25)	312.64(364.74~268.6)	862.9(1167.32~629.89)	253.89(343.46~185.33)	28191.38(33577.3~23329.37)	9164.42(10915.28~7583.89)	16744.06(19561.9~14287.84)	4926.67(5755.78~4203.97)
Nicaragua	7162.57(8682.16~5677.79)	793.86(962.28~629.29)	3893.62(4892.16~3071.2)	214.77(269.85~169.41)	146072.07(172112.1~121665.45)	16189.72(19075.84~13484.65)	96411.58(109838.13~84754.56)	5318.12(6058.73~4675.11)
Australia	1807.04(2244.52~1404.29)	40.48(50.29~31.46)	1587.16(2131.04~1146.51)	26.35(35.37~19.03)	206455.04(240977.09~171076.63)	4625.4(5398.83~3832.78)	247335.29(282955.99~211378.97)	4105.6(4696.88~3508.75)
Jamaica	1376.38(1664.38~1121.61)	231(279.34~188.24)	1574.31(2257.67~1097.04)	203.89(292.4~142.08)	67235.19(80747.62~55430.36)	11284.31(13552.14~9303.06)	35065.64(41467.11~29466.76)	4541.47(5370.55~3816.34)
Oman	1605.82(2697.45~900.68)	473.68(795.69~265.68)	1115.97(1721.84~716.09)	109.9(169.56~70.52)	36673.39(42321.3~31485.83)	10817.92(12483.94~9287.69)	44008.6(50703.22~38439.26)	4333.73(4992.98~3785.29)
Netherlands	1679.12(1990.68~1393.49)	42.38(50.25~35.17)	905.47(1168.08~691.01)	24.67(31.83~18.83)	171668.17(198753.83~145353.64)	4333.08(5016.75~3668.87)	138349.64(159723.33~116613.42)	3770.14(4352.59~3177.81)
Canada	1958.62(2472.94~1498.95)	26.63(33.62~20.38)	2783.26(3389.22~2242)	33.56(40.86~27.03)	216610.9(247869.36~177291.66)	2944.63(3369.56~2410.12)	229857.37(262355.14~195344.63)	2771.39(3163.22~2355.27)
Malaysia	26814.86(37479.42~17443.03)	598.49(836.51~389.31)	19110.16(24888.88~14210.91)	226.78(295.36~168.64)	306698.27(355054.2~264649.63)	6845.26(7924.52~5906.77)	316114.43(361018.05~275423.46)	3751.34(4284.21~3268.46)
Algeria	77890.79(107200.76~52240.15)	1340.34(1844.7~898.94)	36947.02(54562.76~23283.93)	329.2(486.16~207.46)	507743.21(591186.79~435472.04)	8737.21(10173.1~7493.57)	583002.37(668451.86~506981.81)	5194.56(5955.92~4517.22)
United Kingdom	6907.81(8320.93~5701.57)	48.68(58.63~40.18)	4190.37(5451.1~3158)	27.32(35.54~20.59)	688652.33(799148.34~583416.36)	4852.55(5631.16~4111.01)	606267.9(684726.72~533880.04)	3952.32(4463.8~3480.42)
Bolivia (Plurinational State of)	47762.43(59732.13~36008.67)	3122(3904.4~2353.72)	28964.35(41245.25~20683.2)	928.95(1322.82~663.35)	321915.24(377022.66~272829.31)	21042.06(24644.17~17833.55)	319893.26(370105.42~270217.78)	10259.64(11870.05~8666.45)
Madagascar	113116.37(149383.85~83701.55)	4200(5546.61~3107.83)	158365.59(214871.52~109505.52)	2186.34(2966.45~1511.8)	435284.69(491998.96~386713.2)	16162.07(18267.86~14358.62)	664534.69(749723.1~585154.6)	9174.35(10350.43~8078.45)
Lesotho	9025.11(12393.5~6425.7)	2385.47(3275.78~1698.41)	8611.57(13738.31~5171.77)	1698.91(2710.32~1020.3)	37639.89(42590.75~33170.58)	9948.77(11257.36~8767.47)	28293.21(31936.62~24959.44)	5581.73(6300.51~4924.04)
Luxembourg	41.82(49.12~34.65)	43.04(50.54~35.66)	32.91(41.31~25.28)	21.14(26.53~16.24)	3654.79(4250.05~3023.77)	3760.96(4373.51~3111.61)	4464.47(5216.86~3800.68)	2867.64(3350.91~2441.27)
Venezuela (Bolivarian Republic of)	25866.86(29069.95~22973.66)	534.38(600.56~474.61)	27490.53(36654.22~19846.06)	400.52(534.03~289.14)	508982.8(597478.52~435540.55)	10515.06(12343.29~8997.82)	436636.09(507238.18~374533.97)	6361.48(7390.1~5456.69)
Benin	71084.98(92345.9~52611.85)	6489.16(8430.02~4802.8)	75104.62(106061.34~47693.54)	2315.1(3269.34~1470.15)	163263.92(184904.87~146576.28)	14903.94(16879.48~13380.56)	489372.98(557814.16~431291.7)	15084.91(17194.61~13294.56)
Mauritania	47469.45(59092.58~36711.03)	10098.51(12571.18~7809.79)	30680.35(49370.32~17100.11)	2858.14(4599.28~1593.02)	61953.41(68527.89~56042.5)	13179.78(14578.42~11922.31)	83051.12(91882.33~75595.17)	7736.94(8559.64~7042.35)
Gambia	13922.92(19776.52~8724.33)	6135.3(8714.76~3844.48)	18797.03(28782.32~11431.48)	3056.54(4680.22~1858.84)	33962.01(38384.53~29936.56)	14965.77(16914.61~13191.9)	59193.28(66527.26~52841.63)	9625.26(10817.82~8592.44)
Saudi Arabia	30590.45(48095.63~17231.4)	938.06(1474.85~528.4)	24132.18(37284.6~14842.42)	237.84(367.47~146.29)	385626.97(440887.16~333229.69)	11825.25(13519.81~10218.49)	285819.59(326944.97~250286.15)	2817.02(3222.35~2466.8)
Latvia	998.34(1169.09~853.91)	154.04(180.39~131.76)	152.37(207.96~109.66)	39.1(53.37~28.14)	54284.89(62916.3~46152.7)	8376.04(9707.84~7121.26)	29116.13(33979.28~24797.41)	7471.76(8719.74~6363.49)
Iceland	22.51(28.8~17)	34.7(44.4~26.22)	17.63(23.47~12.5)	22.14(29.47~15.7)	3285.88(3657.94~2846.5)	5066.09(5639.73~4388.66)	3088.29(3518.18~2619.13)	3878.16(4417.99~3289)
Monaco	2.64(3.83~1.55)	37.9(55~22.2)	2.55(3.91~1.56)	35.67(54.75~21.82)	251.57(287.61~214.53)	3608.92(4126.02~3077.56)	233.58(264.84~201.6)	3271.13(3709.03~2823.29)
Croatia	637.3(777.83~528.74)	53.08(64.78~44.04)	150.75(200.13~109.41)	16.81(22.31~12.2)	39472.92(44332.27~35113.4)	3287.5(3692.21~2924.42)	21457.26(23780.91~19437.45)	2391.99(2651.02~2166.82)
Togo	32690.76(43904.46~22080.03)	3831.38(5145.63~2587.79)	31884.85(49989.3~18863.66)	1478.67(2318.28~874.81)	112754.11(125585.88~100806.11)	13214.85(14718.75~11814.54)	192610.29(216479.54~171235.71)	8932.38(10039.33~7941.13)
Grenada	62.12(73.59~51.18)	319.13(378.08~262.94)	66.82(83.52~52.52)	260.87(326.07~205.05)	2647.98(3238.75~2175.34)	13604.21(16639.31~11175.97)	1480.41(1762.5~1239.92)	5779.46(6880.74~4840.61)
Cuba	6796.53(7814.31~5943.37)	221.81(255.03~193.97)	3196.46(3834.15~2632.52)	128.43(154.05~105.77)	267345.03(316213.16~213534.1)	8725.01(10319.86~6968.85)	144300.33(168954.85~120551.21)	5797.8(6788.38~4843.59)
North Macedonia	512.03(674.85~362.92)	100.61(132.6~71.31)	147.89(206.81~102.05)	27.87(38.97~19.23)	24937.36(28753.28~21197.19)	4900.04(5649.84~4165.12)	14047.42(15888.06~12135.54)	2646.86(2993.68~2286.62)
Democratic People's Republic of Korea	27760.33(45597.94~15217.1)	489.52(804.07~268.34)	10807.54(18505.03~6042.28)	164(280.81~91.69)	347161.03(408691.77~294240.76)	6121.82(7206.85~5188.62)	165570.22(197347.9~141143.24)	2512.5(2994.73~2141.83)
Bermuda	22.11(26.44~18.6)	129.25(154.55~108.73)	12.83(15.67~10.46)	95.19(116.25~77.56)	1147.48(1357.36~955.59)	6708.3(7935.27~5586.49)	597.32(716.25~507.31)	4430.48(5312.65~3762.86)
Morocco	171120.39(221426.47~130646.84)	2717.21(3516.02~2074.54)	35142.23(58295.82~19740.29)	362.82(601.87~203.81)	573711.9(669365.06~496301.1)	9109.95(10628.82~7880.75)	362335.71(413169.65~315035.78)	3740.9(4265.73~3252.56)
Republic of Moldova	2849.67(3322.57~2434.89)	253.2(295.22~216.35)	377.57(474.07~298.66)	42.8(53.74~33.86)	109917.06(127290.45~93323.15)	9766.46(11310.14~8292.04)	43923.52(50244.92~37725.83)	4979.5(5696.14~4276.88)
Saint Kitts and Nevis	140.69(161.79~121.79)	1409.16(1620.45~1219.88)	71.78(91.64~54.1)	459.71(586.96~346.52)	1219.4(1455.86~995.14)	12213.63(14582.01~9967.43)	710.13(847.15~590)	4548.27(5425.86~3778.84)
Bhutan	7858.34(11436.06~4969.77)	5489.11(7988.17~3471.42)	1295.72(2113.93~727.67)	625.86(1021.07~351.48)	19647.58(22838.58~16671.03)	13723.98(15952.91~11644.83)	10601.11(12399.51~8967.77)	5120.54(5989.2~4331.61)
Argentina	29155.14(34940.76~24175.38)	363.22(435.3~301.18)	17419.81(21866.49~13781.91)	146.55(183.96~115.95)	633882.82(714080.84~551127.35)	7897.09(8896.22~6866.1)	612041.01(684467.53~536842.55)	5149.13(5758.46~4516.48)
Paraguay	9032.33(11189.04~7218.23)	960.72(1190.12~767.76)	7906.05(10901.93~5492.76)	416.76(574.69~289.55)	114014.56(133185.2~95642.9)	12127.11(14166.18~10173.01)	121247.96(141488.3~102993.71)	6391.51(7458.46~5429.25)
Portugal	1303.26(1534.44~1103.98)	51.51(60.65~43.64)	576.79(705.09~455.38)	24.78(30.29~19.56)	88869.27(101675.16~75504.25)	3512.72(4018.9~2984.44)	67025.72(73960.47~61076.65)	2879.26(3177.16~2623.7)
Iraq	31568.01(47391.07~19537.03)	777.98(1167.93~481.48)	18013.3(27959.12~11565.04)	170.86(265.2~109.7)	557565.56(649120.2~478775.86)	13740.94(15997.27~11799.21)	617384.04(710494.66~531108.87)	5856.14(6739.33~5037.78)
Estonia	554.41(665.56~472.78)	145.5(174.67~124.07)	103.67(147.04~69.63)	37.24(52.82~25.01)	39530.47(43788.64~35000.41)	10374.12(11491.61~9185.28)	20178.12(23258.44~17248.72)	7248.79(8355.36~6196.43)
France	8091.59(9831.06~6456.88)	55.91(67.93~44.62)	4403.91(5686.13~3331.17)	31.02(40.05~23.46)	692863.04(798706.29~592926.28)	4787.64(5519.01~4097.08)	609821.07(697581.77~517741.19)	4295.32(4913.47~3646.75)
Timor-Leste	13162.13(18223.3~8349.88)	7063.18(9779.15~4480.79)	4460.22(6948.37~2742.55)	1288.29(2006.97~792.16)	22840.11(26248.3~19955.87)	12256.67(14085.6~10708.9)	24321.44(28151.84~21132.05)	7025.02(8131.4~6103.8)
El Salvador	21488.74(26370.5~16578.1)	1639.4(2011.83~1264.76)	3271.99(4440.1~2275.53)	184.2(249.97~128.11)	211489.57(257587.22~172950.98)	16134.78(19651.62~13194.62)	78541.34(90595.18~68660.15)	4421.66(5100.26~3865.38)
Afghanistan	137688.69(194940.97~90529.66)	6257.75(8859.79~4114.44)	224006.73(340109.9~134311.71)	3113.24(4726.84~1866.66)	314538.64(368888.91~265803.27)	14295.33(16765.48~12080.38)	814178.8(963500.68~694043.35)	11315.44(13390.71~9645.8)
Japan	15400.88(18403.17~12870.31)	47.97(57.33~40.09)	4760.35(5936.12~3702.15)	19.14(23.87~14.89)	2039391.09(2290188.07~1778005.58)	6352.66(7133.89~5538.45)	553670.96(629084.95~493255.73)	2226.59(2529.87~1983.63)
Israel	855.26(1038.95~699.78)	70.11(85.17~57.36)	919.07(1217.62~677.88)	41.32(54.74~30.47)	90598.29(102225.2~80792.86)	7426.75(8379.86~6622.96)	150694.4(168766.3~129294.9)	6774.47(7586.9~5812.46)
Uruguay	1271.78(1489.93~1088.44)	169.34(198.39~144.93)	808.64(970.55~661.72)	97.15(116.6~79.5)	55006.36(61683.17~47829.77)	7324.27(8213.3~6368.68)	51574.08(58156.46~45767.51)	6196.01(6986.81~5498.42)
Greenland	14(19.41~9.65)	95.03(131.79~65.51)	8.74(12.69~5.9)	68.68(99.67~46.33)	929.85(1082.21~792.57)	6312.23(7346.5~5380.29)	581.7(669.15~497.22)	4570.19(5257.29~3906.49)
Niue	1.84(3.09~0.99)	371.07(622.97~199.16)	1.6(2.44~0.99)	416.92(636.47~258.92)	30.9(35.45~26.81)	6237.34(7155.17~5412.9)	15.13(17.25~13.21)	3943.67(4494~3442.45)
Albania	1623.79(2108.03~1218.94)	194.44(252.42~145.96)	214.13(300.65~145.52)	34.89(48.99~23.71)	43469.39(50018.74~38254.1)	5205.21(5989.46~4580.71)	19478.8(22354.09~17047.08)	3173.9(3642.4~2777.67)
Tokelau	1.88(3.38~0.98)	533.21(957.97~277.54)	1.3(1.99~0.8)	405.48(618.71~248.73)	25.33(29.4~22.14)	7169.71(8320.62~6265.93)	15.25(17.29~13.35)	4741.07(5377.69~4151.82)
Nepal	288355.43(409923.82~178036.51)	6313.17(8974.75~3897.88)	76252.1(128877.35~43380.62)	840.59(1420.72~478.22)	671589.87(777919.86~581704.92)	14703.59(17031.55~12735.68)	826346.02(968906.09~677728.77)	9109.45(10681~7471.13)
Kuwait	238.94(314.47~184.76)	57.65(75.88~44.58)	398.08(515.41~302.69)	27.23(35.26~20.71)	26716.54(30919.14~22919.08)	6446.44(7460.48~5530.15)	37491.57(43224.06~32593.08)	2564.84(2957~2229.73)
Peru	81430.84(103341.54~62664.89)	1499.01(1902.35~1153.56)	38074.09(54885.79~24816.26)	395.83(570.61~258)	838144.52(993942.84~698012.56)	15428.91(18296.91~12849.3)	807467.65(936970.06~691467.73)	8394.64(9740.98~7188.68)
Dominican Republic	13902.24(16605.48~11166.09)	736.38(879.56~591.45)	13278.99(17590.2~9946.99)	458.4(607.23~343.38)	246529.77(291363.96~206922.59)	13058.26(15433.05~10960.34)	172863.91(202115.3~146755.82)	5967.38(6977.16~5066.11)
Fiji	1304.32(2000.39~780.39)	667.2(1023.26~399.19)	1001.86(1596.55~585.45)	438.68(699.07~256.34)	13595.89(15951.19~11569.61)	6954.69(8159.49~5918.19)	14419.56(16817.66~12153.77)	6313.74(7363.77~5321.64)
Spain	3526.33(4423.1~2837.88)	36.62(45.93~29.47)	2164.46(2830.54~1582.3)	21.86(28.58~15.98)	375693.45(424728.95~323860.1)	3900.99(4410.15~3362.78)	323489.83(360863.54~287392.07)	3266.52(3643.91~2902.01)
Equatorial Guinea	7348.88(11109.75~4163.09)	7440.66(11248.5~4215.09)	5335.15(9668.56~2548.46)	1463.81(2652.76~699.22)	15619.11(17572.38~13830.36)	15814.18(17791.85~14003.1)	27863.99(31103.89~24806.92)	7645.05(8533.98~6806.28)
Lithuania	1079.06(1314.74~901.61)	117.05(142.61~97.8)	206.65(292.51~140.04)	36.07(51.06~24.44)	90135.81(106258.46~76087.57)	9777.26(11526.12~8253.41)	43737(51182.3~36728.27)	7633.96(8933.48~6410.64)
Cambodia	88763.46(121366.42~62987.43)	3544.37(4846.23~2515.12)	29259.65(45873.56~18025.72)	647.55(1015.23~398.93)	268270.01(306931.49~234567.16)	10712.17(12255.95~9366.4)	349661.05(413799.67~291702.85)	7738.38(9157.84~6455.7)
Seychelles	60.44(81.78~41.09)	334(451.92~227.04)	58.61(82.12~40.36)	241.8(338.79~166.5)	1240.79(1463.45~1053.65)	6856.31(8086.67~5822.21)	1147.85(1316.73~994.34)	4735.2(5431.87~4101.92)
Comoros	3764.71(5352.67~2133.45)	3573.32(5080.55~2024.99)	2324.28(3407.67~1534)	1190.58(1745.53~785.77)	19424.49(21856.5~17191.59)	18436.98(20745.36~16317.6)	16030.69(17992.55~14272.39)	8211.49(9216.43~7310.83)
Kyrgyzstan	6030.55(6913.73~5229.16)	575.33(659.59~498.87)	3083.98(3785.5~2471.72)	178.87(219.56~143.36)	90109.24(106640.84~75667.81)	8596.64(10173.8~7218.89)	96502.08(113308.5~82488.53)	5597.2(6571.98~4784.4)
Eswatini	2387.12(3510.47~1458.88)	1224.82(1801.21~748.55)	2361.44(4228.6~1141.01)	749.25(1341.68~362.03)	21696.3(24417.27~19020.36)	11132.29(12528.41~9759.27)	25707.8(29563.52~22254.73)	8156.74(9380.11~7061.13)
Yemen	180404.01(248328.86~119944.67)	6586.12(9065.89~4378.89)	127328.09(207827.36~75933.57)	1523.86(2487.27~908.77)	468207.48(537837.37~406711.97)	17093.13(19635.15~14848.08)	664863.13(770992.1~575323.52)	7957.04(9227.19~6885.44)
Mozambique	132200.48(174503.63~99923.28)	4189.46(5530.05~3166.59)	156238.52(228893.86~100810.73)	2057.86(3014.82~1327.8)	584908.56(664102.5~516152.18)	18535.85(21045.52~16356.95)	997818.25(1136750.13~885707.48)	13142.53(14972.44~11665.89)
Qatar	261.49(385.25~164.89)	330.72(487.24~208.54)	335.94(496.78~217.03)	60.55(89.55~39.12)	6901.03(7888.53~6019.42)	8728.07(9977.01~7613.05)	19721.66(22320.81~17191.24)	3554.87(4023.37~3098.76)
Greece	726.43(897.68~577.78)	28.83(35.63~22.93)	450.37(572.24~347.88)	20.78(26.4~16.05)	95422.79(112972.48~77779.54)	3787.04(4483.53~3086.83)	65286.51(73707.96~56709.76)	3012(3400.53~2616.31)
Hungary	1848.98(2169.06~1576.43)	72.95(85.57~62.19)	512.9(642.33~391.51)	23.98(30.03~18.3)	83648.25(96136.03~72426.5)	3300.09(3792.75~2857.37)	55333.09(63088.92~48303.64)	2587.03(2949.65~2258.38)
India	7681700.88(8439662.6~6853108.7)	3804.57(4179.97~3394.18)	1985766.53(2369624.99~1685367.27)	524.93(626.41~445.52)	24382992.08(28371656.89~20823161.67)	12076.32(14051.81~10313.22)	19401000.24(22645996.94~16249664.83)	5128.62(5986.42~4295.57)
Mali	142899.95(164132.67~122330.92)	7446.89(8553.39~6374.99)	178853.63(246619.02~131111.37)	3285.13(4529.83~2408.22)	315693.37(355116.81~283061.39)	16451.61(18506.07~14751.08)	767378.19(859717.1~680464.12)	14094.98(15791.03~12498.57)
Switzerland	629.38(785.39~508.44)	35.76(44.62~28.88)	441.39(596.45~307.87)	22.56(30.48~15.74)	65678.1(75191.96~55256.73)	3731.19(4271.68~3139.15)	79770.26(90965.06~68612.59)	4077.07(4649.23~3506.8)
Azerbaijan	4701.23(5844.21~3765.95)	250.71(311.66~200.83)	1654.21(2228.19~1192.95)	60.35(81.29~43.52)	132205.77(157432.13~110918.99)	7050.3(8395.58~5915.12)	91409.29(108431.22~77738.54)	3334.76(3955.75~2836.03)
Finland	408.23(512.31~309.46)	32.31(40.55~24.5)	270.31(357.84~193.97)	23.78(31.49~17.07)	46430.82(51930.36~39557.22)	3675.29(4110.62~3131.2)	35172.37(40590.19~29732.35)	3094.74(3571.44~2616.08)
Slovenia	252.86(304.41~210.59)	50.82(61.18~42.32)	85.12(123.53~56.01)	20.24(29.37~13.32)	16774.33(19331.38~14474.64)	3371.14(3885.03~2908.97)	13191.13(15110.39~11438.44)	3136.16(3592.46~2719.46)
Guinea-Bissau	11798.74(16999.39~7514.55)	5058.09(7287.6~3221.47)	10292.07(16740.37~6252.32)	1959.23(3186.75~1190.21)	32671.83(36544.45~29262.76)	14006.34(15666.52~12544.88)	50264.22(56028.09~44950.03)	9568.47(10665.7~8556.84)
United Republic of Tanzania	297120.63(363137.41~234554.97)	4951.86(6052.1~3909.13)	377045.27(515969.41~256898.81)	2537.41(3472.33~1728.86)	1141718.86(1290332.69~1003810.79)	19028.05(21504.87~16729.66)	1832055.18(2106206.59~1595809.31)	12329.21(14174.17~10739.34)
Burkina Faso	86875.5(115228.93~61671.46)	4150.39(5504.95~2946.29)	126042.19(180459.3~87800.37)	2294.66(3285.36~1598.45)	328955.69(368545.81~293720.43)	15715.54(17606.92~14032.21)	792547.13(892445.99~698289.29)	14428.74(16247.45~12712.72)
Brazil	276009.94(298495.05~254177.61)	708.61(766.34~652.56)	129828.65(143190.57~117514.02)	221.11(243.87~200.14)	3681387.4(4360485.05~3087501.31)	9451.36(11194.84~7926.66)	3194694.71(3695293.56~2768326.15)	5440.94(6293.52~4714.78)
Coted'Ivoire	109822.52(155191~75324.31)	4013.31(5671.24~2752.62)	157852.78(246754.49~95675.76)	2370.58(3705.68~1436.83)	386940.51(430623.93~345111.86)	14140.2(15736.55~12611.63)	633443.97(707890.03~570212.47)	9512.86(10630.87~8563.27)
Somalia	169385.03(237861.4~110599.21)	10000.95(14043.97~6530.07)	267740.14(384048.36~171604.5)	5535.9(7940.74~3548.16)	327509.29(369098.01~293053.68)	19337.03(21792.53~17302.67)	732819.27(822198.49~652727.43)	15152.07(17000.11~13496.05)
Burundi	101429.26(139854.28~66263.71)	8053.83(11104.91~5261.56)	83003.44(117149.72~52784.44)	2653.98(3745.78~1687.75)	234680.2(265129.49~208344.7)	18634.41(21052.19~16543.28)	411935.19(466066.63~363532.61)	13171.34(14902.16~11623.7)
New Zealand	722.25(920.74~569.1)	79.9(101.86~62.96)	506.97(668.25~383.19)	42.43(55.93~32.07)	75917.24(85645.69~65528.22)	8398.49(9474.71~7249.18)	65851.67(71925.78~59988.46)	5511.75(6020.15~5021.01)
Niger	120499.5(158598.97~91951.22)	6927.06(9117.25~5285.93)	240501.94(350372.28~150698.08)	4511.31(6572.24~2826.78)	300743.19(334884.76~267444.77)	17288.58(19251.25~15374.38)	979490.73(1095307.16~866430.82)	18373.17(20545.64~16252.41)
Sudan	235687.58(334281.57~167663.44)	5034.04(7139.9~3581.12)	140339.82(233458.88~74365.27)	1243.16(2068.03~658.74)	716652.25(835037.31~608669.54)	15306.94(17835.52~13000.55)	836890.41(975846.47~711503.64)	7413.36(8644.26~6302.66)
Nauru	33.76(57.18~18.83)	1387.19(2349.17~773.7)	27.54(47.06~15.55)	967.14(1652.73~545.98)	255.62(293.89~220.46)	10502.5(12074.95~9057.74)	199.33(229.33~174.21)	7000.3(8053.88~6118.16)
Singapore	457.1(538.26~392.99)	48.91(57.59~42.05)	184.09(238.1~138.21)	12.66(16.37~9.5)	22572.41(26459.69~19492.87)	2415.11(2831.03~2085.62)	16683.07(20411.5~13495.25)	1146.87(1403.18~927.72)
Guatemala	54806.96(63087.17~46820.07)	2983.22(3433.93~2548.48)	33399.38(41822.82~25902.73)	759.88(951.52~589.32)	350270.71(410316.02~293695.34)	19065.75(22334.1~15986.27)	375803.21(437472.76~317255.91)	8549.97(9953.02~7217.95)
Bulgaria	2163.15(2541.86~1864.34)	104.46(122.74~90.03)	442.08(563.46~348.68)	31.04(39.56~24.48)	75214.15(87010.02~64017.04)	3632.03(4201.64~3091.33)	37824.42(43095.07~33146.43)	2655.35(3025.36~2326.94)
Marshall Islands	74.4(130.77~41.83)	760.89(1337.46~427.78)	85.88(147.48~48.17)	579.03(994.39~324.76)	934.09(1074.02~794.64)	9553.28(10984.36~8127.09)	750.82(859.44~645.37)	5062.32(5794.72~4351.35)
Guam	75.73(103.3~52.11)	217.05(296.06~149.34)	69.36(96.24~48.66)	192.23(266.76~134.88)	3473.51(4094.26~2945.86)	9955.17(11734.23~8442.9)	2406.85(2779.69~2063.14)	6671.15(7704.54~5718.47)
Tuvalu	28.06(52.8~15.07)	1152.93(2169.75~619.26)	15.65(26.08~9.19)	538.91(897.99~316.56)	254.45(289.27~224.38)	10455.56(11886.59~9219.95)	177.66(202.07~152.4)	6117.31(6957.69~5247.59)
Libya	4395.01(6507.93~2629.55)	482.58(714.58~288.73)	2825.05(4558.36~1650.03)	142.02(229.16~82.95)	91867.76(106485.95~77848.46)	10087.23(11692.33~8547.89)	49037.43(56041.53~42605.96)	2465.23(2817.35~2141.91)
South Sudan	82723.33(123456.93~48580.33)	6387.85(9533.28~3751.35)	113157.93(177916.5~69191.01)	4874.03(7663.36~2980.25)	243863.11(273756.14~217158.67)	18830.97(21139.3~16768.87)	425284.47(483119.88~374249.12)	18318.18(20809.32~16119.95)
Mexico	127749.96(145189.12~112624.67)	583.52(663.17~514.43)	62406.26(75399.83~51061.51)	178.08(215.16~145.71)	3530175.71(4117687.64~2987712.63)	16124.56(18808.1~13646.79)	2839311.59(3188353.98~2505188.9)	8102.14(9098.15~7148.7)
Bahamas	200.32(238.42~166.75)	276.18(328.7~229.9)	257.06(337.24~194.86)	238.42(312.78~180.73)	5372.45(6313.78~4508.05)	7406.92(8704.71~6215.19)	4886.64(5765.42~4096.56)	4532.24(5347.29~3799.46)
Jordan	9844.25(13188.29~6691.19)	1180.44(1581.44~802.35)	3883.01(5803.48~2437.59)	125.3(187.27~78.66)	87945.3(104927.49~73807.12)	10545.7(12582.07~8850.36)	152644.94(175866.98~131789.67)	4925.6(5674.94~4252.64)
Kazakhstan	12434.99(14112.34~10859.63)	302.19(342.96~263.91)	3649.34(4458.22~2903.15)	77.06(94.14~61.3)	257685.62(302214.84~216501.21)	6262.23(7344.38~5261.38)	248466.76(286503.43~214058.77)	5246.59(6049.77~4520.04)
Middle SDI	4104427.31(4679610.2~3649178.75)	918.09(1046.74~816.25)	1512765.16(1734623.27~1340739.45)	244.6(280.47~216.78)	39196436.99(45611702.13~33252168.72)	8767.53(10202.5~7437.9)	27906492.63(31471274.16~24519241.94)	4512.2(5088.59~3964.52)
Saint Lucia	114.89(135.76~97.49)	336.85(398.04~285.86)	99.11(125.18~79.08)	216.98(274.07~173.14)	4340.47(5242.67~3570.04)	12726.55(15371.86~10467.59)	1833.75(2164.33~1566.18)	4014.66(4738.4~3428.85)
Palestine	1560.13(2348.63~922.18)	352.92(531.29~208.61)	1298.54(1822.12~874.33)	99.73(139.94~67.15)	56856.3(66731.67~48020.89)	12861.73(15095.68~10863.03)	69695.61(80811.19~59060.88)	5352.55(6206.22~4535.82)
Bangladesh	1322504.97(1554025.43~1111853.05)	5371.76(6312.15~4516.13)	267743.32(368621.93~183928.83)	582.11(801.43~399.89)	2812864.36(3280273.44~2391470.63)	11425.32(13323.84~9713.7)	1894492.61(2181357.48~1619300.19)	4118.88(4742.57~3520.58)
Belarus	2954.01(3525.93~2526.55)	116.59(139.16~99.72)	892.16(1171.65~661.84)	42.07(55.25~31.21)	207362.78(235350.17~179172.39)	8184.19(9288.8~7071.57)	115721.94(132824.55~100001.43)	5456.84(6263.31~4715.55)
Antigua and Barbuda	26.18(30.47~22.17)	161.15(187.55~136.46)	29.32(34.36~25.21)	121.32(142.21~104.34)	1105.37(1297.25~931.64)	6803.28(7984.25~5734.04)	846.62(983.12~734.49)	3503.62(4068.51~3039.6)
Bahrain	427.07(578.44~301.59)	370.41(501.69~261.57)	402.61(566.97~278.76)	123.49(173.91~85.5)	13815.01(16511.01~11567.08)	11982.05(14320.35~10032.38)	17452.74(20862.07~14710.76)	5353.24(6398.97~4512.19)
Sweden	696.43(878.43~532.59)	33.93(42.79~25.94)	462.73(598.35~337.8)	21.06(27.24~15.38)	119217.83(136423.35~101338.79)	5807.65(6645.81~4936.68)	86683.54(100512.8~74839.96)	3945.62(4575.09~3406.53)
Germany	8896.73(10809.34~7259.18)	45.78(55.62~37.35)	4969.38(6785.18~3527.41)	29.18(39.84~20.71)	829161.85(952010.92~690407.12)	4266.28(4898.38~3552.35)	706168.19(812658.89~601864.12)	4146.44(4771.72~3533.99)
Armenia	1674.52(2015.69~1388.36)	193.34(232.73~160.3)	313.41(386.47~249.81)	42.54(52.45~33.9)	50035.93(59527.87~42435.36)	5777.17(6873.12~4899.61)	18575.84(21478.03~16123.01)	2521.14(2915.03~2188.24)
Panama	2667.04(3103.91~2278.57)	435.82(507.21~372.34)	3119.49(3813.19~2482.16)	291.85(356.74~232.22)	79256.2(94307.75~64482.8)	12951.34(15410.93~10537.21)	87747.72(105326.97~72937.35)	8209.27(9853.9~6823.68)
Ireland	316.02(392.05~249.64)	35.79(44.4~28.27)	253.34(329.05~186.43)	21.71(28.2~15.98)	32907.02(37606.57~27881.34)	3726.51(4258.7~3157.38)	37514.07(42969.93~31863.03)	3215.38(3683~2731.02)
Mauritius	805.49(937.17~684.8)	269.6(313.68~229.21)	432.88(509.56~367.16)	136.77(161~116.01)	14022.08(16383.19~12065.27)	4693.3(5483.59~4038.35)	7333.81(8402.1~6392.65)	2317.17(2654.71~2019.8)
Belize	153.37(181.03~131.4)	364.33(430.05~312.13)	365.37(440.08~305.33)	302.48(364.33~252.77)	9116.94(10801.2~7432.95)	21657.34(25658.29~17657.01)	10537.5(12593.67~8681.43)	8723.71(10425.95~7187.12)
Suriname	592.01(872.03~352.93)	608.78(896.72~362.93)	780.99(1131.75~503.6)	538.15(779.84~347.01)	9685.49(11404.75~8132.32)	9959.73(11727.67~8362.58)	8376.31(9785.24~7090.29)	5771.77(6742.6~4885.62)
Iran (Islamic Republic of)	48771.14(63321~36259.7)	385.62(500.66~286.7)	14674.88(18847.55~10967.97)	63.13(81.08~47.18)	1421653.23(1626513.36~1228187.7)	11240.63(12860.4~9710.95)	995990.71(1136504.94~876784.26)	4284.67(4889.15~3771.85)
Botswana	4371.77(6480.61~2607.04)	1357.87(2012.88~809.75)	2770.91(3797.43~1841.8)	407.26(558.14~270.7)	34668.16(38753.71~30674.39)	10767.96(12036.93~9527.49)	38535.91(43811.84~34005.19)	5663.94(6439.39~4998.03)
Rwanda	99943.25(131571.73~75222.98)	6159.95(8109.35~4636.33)	54895.52(76694.36~36538.89)	1558.85(2177.86~1037.58)	277422.39(314637.23~246141.06)	17098.77(19392.49~15170.76)	295501.83(332359.52~264183.15)	8391.24(9437.87~7501.9)
Democratic Republic of the Congo	447280.06(612494.36~296995.13)	5240.77(7176.58~3479.89)	693315.34(958137.89~455135.39)	3253.86(4496.72~2136.04)	1387492.82(1559066.13~1246682.4)	16257.22(18267.54~14607.35)	2048943.57(2316392.26~1821646.31)	9616.07(10871.26~8549.33)
Saint Vincent and the Grenadines	88.78(106.48~74.23)	336.98(404.15~281.76)	78.87(96.46~64.46)	283.75(347.06~231.93)	3873.21(4601.93~3153.97)	14701.38(17467.34~11971.38)	2018.49(2388~1657.15)	7262.12(8591.54~5962.09)
Angola	143355.07(213525.17~91185.1)	6227.29(9275.45~3961.05)	134615.86(210195.29~81894.83)	1753.95(2738.69~1067.03)	373572.65(421729.23~331064.12)	16227.85(18319.75~14381.3)	758994.28(861080.05~674328.13)	9889.15(11219.25~8786.01)
Pakistan	811890.78(1110332.54~522476.54)	3432.27(4693.93~2208.77)	736358.69(1203283.82~421616.22)	1215.63(1986.46~696.03)	4131378.99(4716934.99~3583308.48)	17465.4(19940.84~15148.44)	5937216.96(6823934.86~5142961.25)	9801.55(11265.41~8490.34)
Honduras	26325.68(32745.71~20119.48)	2495.26(3103.78~1907.01)	15415.23(27406.92~7761.6)	543.08(965.55~273.44)	228828.38(273326.14~190621.98)	21689.35(25907.05~18067.98)	200936.32(233313.14~173848.95)	7079(8219.63~6124.71)
Lao People's Democratic Republic	68372.66(93527.37~46835.82)	7065.29(9664.66~4839.78)	16521.13(29875.48~8259.59)	832.58(1505.57~416.24)	108526.81(126120.78~95381.39)	11214.63(13032.7~9856.24)	116720.92(134190.15~100223.99)	5882.12(6762.47~5050.76)
United Arab Emirates	958.97(1585.24~556.85)	280.19(463.17~162.7)	1278.99(1887.16~840.84)	74.19(109.46~48.77)	26617.86(30395.64~23316.52)	7777.14(8880.92~6812.56)	47831.21(54987.23~41477.99)	2774.45(3189.54~2405.94)
South Africa	146514.47(194859.73~104703.37)	1517.76(2018.57~1084.63)	89273.98(110927.47~69334.09)	576.42(716.23~447.67)	877208.34(1014250.02~761714.72)	9087.09(10506.72~7890.68)	1105417.98(1300954.04~936632.32)	7137.38(8399.91~6047.58)
Egypt	178856.91(236480~122817.85)	1363.93(1803.35~936.59)	58970.18(80831.15~40083.53)	227.27(311.52~154.48)	1336610.93(1536663.82~1137599.91)	10192.74(11718.31~8675.12)	1540261.71(1779588.42~1322366.39)	5936.02(6858.36~5096.27)
Syrian Arab Republic	28875.38(40972.82~18801.49)	1047.18(1485.9~681.85)	4362.12(7123.23~2523.34)	112.12(183.1~64.86)	299028.24(346457.3~257471.28)	10844.44(12564.48~9337.35)	114525.18(129959.2~100100.13)	2943.75(3340.46~2572.97)
Kenya	215723.36(274842.75~161571.67)	4164.99(5306.41~3119.48)	207547.9(296235.69~142455.49)	1563.73(2231.93~1073.3)	907216.53(1036813.51~800253.05)	17515.71(20017.85~15450.55)	1244553.15(1411087.02~1098421.67)	9376.83(10631.55~8275.83)
Zimbabwe	48349.79(66644.21~33706.35)	2010.86(2771.72~1401.84)	82977.85(129455.01~50854.21)	2043.47(3188.05~1252.37)	308992.36(353749.38~267101.41)	12850.94(14712.38~11108.7)	372678.47(426554.26~320733.19)	9177.84(10504.62~7898.6)
Djibouti	6013.97(8552.69~3979.76)	6118.3(8701.06~4048.8)	7876.61(12750.46~4387.73)	2451.53(3968.48~1365.65)	14635.66(16412.02~12867.64)	14889.56(16696.74~13090.87)	28493.53(31543.02~25496.8)	8868.39(9817.52~7935.68)
Tunisia	10456.71(14568.01~7160.74)	511.43(712.51~350.23)	3755.83(6352.19~2118.86)	122.41(207.04~69.06)	228094.8(271530.44~189588.93)	11155.92(13280.32~9272.63)	115873.39(138853.81~98505.5)	3776.65(4525.65~3210.58)
Gabon	6642.64(8795.79~4824.08)	3000.58(3973.18~2179.11)	4959.41(8220.66~2777.89)	1013.02(1679.18~567.42)	27855.73(31416.59~24618.79)	12582.83(14191.32~11120.66)	32278.76(35955.46~28853.5)	6593.36(7344.37~5893.7)
High-middle SDI	743059.22(878987.23~611071.45)	267.52(316.46~220)	197684.37(234711.94~166608.43)	64.79(76.92~54.6)	18683262.68(21742378.62~15854762.67)	6726.55(7827.93~5708.21)	12276252.76(13662460.96~10928840.32)	4023.31(4477.62~3581.72)
Guinea	114437.24(148310.02~84665.91)	8389.59(10872.86~6207)	123483.21(183488.2~77820.6)	3720.95(5529.09~2344.98)	218969(243195.44~196570.97)	16052.99(17829.08~14410.96)	408698.56(465100.77~360919.65)	12315.4(14014.98~10875.67)
Cameroon	116226.76(154388.36~83533.96)	4884.73(6488.57~3510.73)	189267.27(258349.58~121819.84)	2416.38(3298.35~1555.28)	381191.88(431074.06~337061.46)	16020.57(18116.99~14165.87)	847768.11(947962.17~753688.19)	10823.47(12102.65~9622.35)
Zambia	71216.12(93343.73~52780.55)	3872.41(5075.61~2869.97)	73540.74(109379.41~46353)	1495.07(2223.67~942.35)	399611.53(460762.62~347043.02)	21729.09(25054.21~18870.65)	630432.66(722178.24~543873.14)	12816.61(14681.79~11056.87)
Nigeria	1092535.42(1521228~720560.45)	5394.73(7511.53~3557.99)	1566991.07(2328002.97~1036404.39)	2728.96(4054.29~1804.93)	3340328.81(3732191~3025040.6)	16493.89(18428.83~14937.06)	6235883.55(6910033.69~5635532.5)	10859.98(12034.03~9814.45)
Liberia	48758.02(66689.07~33998.86)	8788.03(12019.88~6127.87)	53804.78(79346.21~33861.8)	3856.06(5686.55~2426.79)	100733.08(114764.06~89694.18)	18155.89(20684.81~16166.27)	141200.68(158986.89~124550.5)	10119.5(11394.2~8926.23)
Papua New Guinea	24619.87(37084.89~12072.47)	2554.64(3848.05~1252.68)	45159.62(64319.37~29624.78)	1726.15(2458.5~1132.36)	92264.52(105657.96~79068.01)	9573.67(10963.41~8204.35)	183890.74(210332.17~159874.46)	7028.9(8039.58~6110.92)
Turkey	119525.91(169658~75994.68)	839.12(1191.07~533.51)	19671.72(28921.16~13337.41)	90.86(133.58~61.6)	1640461.88(1962480.45~1347359.94)	11516.7(13777.4~9459.01)	995929.55(1151909.74~840769.31)	4599.8(5320.22~3883.18)
Maldives	1531.33(1956.86~1118.95)	3217.23(4111.26~2350.85)	241.34(330.61~165.59)	209.51(287.01~143.75)	6029.73(7014.44~5148.55)	12668.11(14736.93~10816.81)	4547.79(5196.55~3940.26)	3948.01(4511.21~3420.6)
Cabo Verde	1027.96(1485.92~653.22)	1296.07(1873.48~823.59)	372.1(573.12~231.21)	247.58(381.32~153.84)	11525.53(13201.87~10011.51)	14531.58(16645.13~12622.67)	10356.83(11996.35~9022.13)	6890.93(7981.79~6002.89)
Uganda	161725.96(213226.77~120382.51)	4202.85(5541.23~3128.44)	185769.15(252194.35~127422.8)	1783.89(2421.76~1223.61)	852403.18(972470.91~742650.57)	22151.83(25272.09~19299.63)	1359461.81(1536334.61~1187149.89)	13054.55(14753.02~11399.89)
Sao Tome and Principe	512.52(747.04~324.89)	1997.8(2911.94~1266.4)	264.44(449.86~147.31)	471.44(801.99~262.63)	3392.5(3801.27~2998.46)	13223.83(14817.2~11687.86)	3185.8(3595.01~2832.46)	5679.58(6409.11~5049.66)
Senegal	87162.91(111091.59~65376.37)	5065.54(6456.17~3799.4)	89762.38(130851.99~60878.5)	2301.01(3354.32~1560.59)	244929.65(272394.6~220722.81)	14234.26(15830.41~12827.47)	296441.33(331196.21~265523.47)	7599.12(8490.04~6806.55)
Montenegro	94.53(131.64~62.73)	60.57(84.34~40.19)	48.8(68.57~34.05)	33.88(47.61~23.64)	6586.7(7512.7~5714.06)	4220.1(4813.39~3661)	4524.33(5095.26~3929.43)	3141.38(3537.8~2728.32)
Chad	101054.77(127491.11~73766.5)	7599.95(9588.13~5547.7)	237561.24(339338.73~155886.92)	6141.74(8773.02~4030.19)	220066.26(246911.23~195557.89)	16550.37(18569.28~14707.18)	626400.8(709837.65~555587.54)	16194.52(18351.63~14363.76)
Palau	42.07(68.05~23.18)	1026.45(1660.23~565.47)	34.75(55.79~20.33)	927.68(1489.64~542.8)	200.5(228.05~174.03)	4891.38(5563.59~4245.68)	119.44(136.27~104.72)	3188.98(3638.34~2795.96)
American Samoa	58.52(84.35~36.76)	486.87(701.74~305.79)	55.66(84.98~34.15)	474.38(724.31~291.02)	1232.96(1413.62~1075.99)	10257.35(11760.37~8951.48)	564(635.99~494.71)	4806.9(5420.48~4216.37)
Sierra Leone	67947.91(93480.18~44996.55)	6767.71(9310.76~4481.72)	84959.3(126274.34~52273.6)	3735.77(5552.44~2298.54)	154530.1(173774.36~138159.18)	15391.41(17308.17~13760.85)	225846.08(255575.85~201530.79)	9930.73(11237.99~8861.56)
Ethiopia	1060881.25(1250305.91~853759.43)	9402.01(11080.78~7566.4)	482998.16(647536.71~337082.44)	1742.47(2336.07~1216.07)	2754924.82(3163325.8~2404706.1)	24415.39(28034.82~21311.59)	4100683.08(4666093.03~3546921.96)	14793.7(16833.49~12795.94)
High SDI	170763.14(202589.23~143279.13)	75.32(89.36~63.2)	139497.37(167040.25~118337.38)	57.37(68.7~48.67)	11965484.19(13220703.87~10618243.13)	5277.96(5831.63~4683.69)	8114874.94(8951350.76~7268719.62)	3337.29(3681.29~2989.3)
Eritrea	78774.38(100219.33~58332.66)	9989.23(12708.62~7397.05)	51952.64(82590.13~30042.7)	3138.71(4989.66~1815.02)	136445.1(153574.12~120418.3)	17302.35(19474.45~15270.02)	215936.17(245002.52~186671.94)	13045.73(14801.77~11277.74)
Northern Mariana Islands	52.71(84.11~29.11)	381.7(609.08~210.83)	31.06(47.74~18.58)	271.41(417.09~162.35)	859.38(991.89~745.47)	6223.34(7182.96~5398.47)	402.33(456.48~354.41)	3515.31(3988.48~3096.62)
United States Virgin Islands	78.71(114.99~48.86)	273.85(400.05~169.98)	23.12(33.79~14.82)	134.41(196.42~86.14)	3686.84(4324.21~3037.85)	12826.86(15044.34~10568.97)	1117.99(1316.51~930.52)	6499.22(7653.26~5409.37)
Mongolia	5846.06(7855.45~4017.59)	1142.34(1534.99~785.05)	1973.01(2803.95~1379.93)	233.82(332.29~163.53)	48462.9(56896.4~41147.48)	9469.85(11117.79~8040.39)	50746.37(58427.34~44128.22)	6013.84(6924.1~5229.54)
Low-middle SDI	9522812.37(10436239.52~8611781.02)	3489.28(3823.97~3155.46)	3825706.81(4502051.64~3272137.27)	755.66(889.26~646.32)	34265759.14(39297855.05~29790840.83)	12555.4(14399.22~10915.73)	32061956.48(36733786.29~27858312.44)	6332.97(7255.76~5502.65)
Puerto Rico	1176.11(1390.68~998.66)	122.76(145.15~104.24)	547.9(680.21~440.17)	73.07(90.71~58.7)	78643.52(94893.21~64598.25)	8208.51(9904.59~6742.52)	21793.4(25752.33~18297.65)	2906.34(3434.3~2440.15)
Low SDI	6970020.11(7884384.71~6036997)	6240.76(7059.46~5405.36)	6455006.95(7769870.68~5363212.84)	2353.17(2832.5~1955.16)	19359512.19(21839551.44~17254794.97)	17333.97(19554.53~15449.47)	30743419.02(34650980.23~27264188.96)	11207.5(12632~9939.15)
