# Supplementary material for: Maternal Disorders among Women Aged 15 to 49 Years Global Trends, Inequalities, and Projections from the GBD Study 2021
Source: Research Square preprint supplement (doi:10.21203/rs.3.rs-5848433/v1), 2025-04-04
Supplement: Supplementary file 7 [file bb2b7213ce7b4959a9cad889.xlsx]

## Sheet: Table S2
cause	year	P1	rlm(95%CI)	SE	P2	Concentration_index(95%CI)
Ectopic pregnancy	1990	<0.01	-122.47(-137.40~-107.54)	0.08	<0.01	-0.53(-0.37~-0.69)
Ectopic pregnancy	2021	<0.01	-75.05(-85.37~-64.72)	0.08	<0.01	-0.70(-0.55~-0.85)
Maternal abortion and miscarriage	1990	<0.01	-765.00(-824.98~-705.022)	0.05	<0.01	-0.66(-0.57~-0.75)
Maternal abortion and miscarriage	2021	<0.01	-133.59(-148.87~-118.32)	0.06	<0.01	-0.65(-0.54~-0.77)
Maternal hemorrhage	1990	<0.01	-1584.99(-1689.71~-1480.26)	0.03	<0.01	-0.58(-0.52~-0.63)
Maternal hemorrhage	2021	<0.01	-356.29(-392.20~-320.37)	0.05	<0.01	-0.63(-0.53~-0.73)
Maternal hypertensive disorders	1990	<0.01	-965.05(-1032.88~-897.23)	0.04	<0.01	-0.57(-0.5~-0.64)
Maternal hypertensive disorders	2021	<0.01	-330.45(-366.46~-294.44)	0.04	<0.01	-0.59(-0.51~-0.66)
Maternal obstructed labor and uterine rupture	1990	<0.01	-339.90(-367.22~-312.57)	0.04	<0.01	-0.63(-0.54~-0.71)
Maternal obstructed labor and uterine rupture	2021	<0.01	-107.02(-119.81~-94.24)	0.04	<0.01	-0.57(-0.5~-0.64)
Maternal sepsis and other maternal infections	1990	<0.01	-579.49(-625.33~-533.65)	0.06	<0.01	-0.63(-0.51~-0.74)
Maternal sepsis and other maternal infections	2021	<0.01	-137.17(-151.68~-122.66)	0.07	<0.01	-0.66(-0.53~-0.79)
